# Supplementary material for: Sensitivity of substrate translocation in chaperone-mediated autophagy to Alzheimer’s disease progression
Source: Aging (Albany NY). 2024 May 23;16(10):9072–105. doi: 10.18632/aging.205856 (PMC11164475; doi:10.18632/aging.205856)
Supplement: Supplementary File 1 [file aging-16-205856-s003.xlsx]

## Sheet: AD_grad
Supplementary File 1. Result set S_1.
rank	value	abs	SYMBOL
1	0.0681147	0.0681147	GFAP		The rankings in this one Sheet were obtained through AD patient calculations.
2	0.0450024	0.0450024	MT1F
3	-0.0427613	0.0427613	SLC1A3
4	0.0409503	0.0409503	RPL31
5	-0.0369353	0.0369353	MTURN
6	0.036552	0.036552	CSRP1
7	-0.0352807	0.0352807	ZNF417
8	-0.0332725	0.0332725	PLP1
9	0.0331552	0.0331552	FAM107A
10	-0.0330847	0.0330847	MT3
11	-0.0322372	0.0322372	CAMK2A
12	0.0318173	0.0318173	CHGA
13	-0.0294383	0.0294383	SPARC
14	-0.0289575	0.0289575	ZNF91
15	0.0288065	0.0288065	CAMK2N1
16	-0.0277145	0.0277145	SCIN
17	-0.0273878	0.0273878	FAM98B
18	0.0268396	0.0268396	RPL38
19	-0.0265481	0.0265481	ALDOC
20	0.02622	0.02622	RAB3A
21	0.0262094	0.0262094	N4BP2
22	0.0261677	0.0261677	ZNF652
23	-0.0258194	0.0258194	ACTB
24	-0.0255368	0.0255368	C1orf61
25	-0.0232248	0.0232248	FSIP2
26	-0.023033	0.023033	C11orf58
27	-0.0224123	0.0224123	PEA15
28	0.0221717	0.0221717	GFOD1
29	-0.0219292	0.0219292	CLU
30	0.0218999	0.0218999	PTN
31	0.0218082	0.0218082	GABPB2
32	0.0214437	0.0214437	GNA11
33	0.0211957	0.0211957	RPL19
34	-0.02098	0.02098	TUBB2B
35	0.0201355	0.0201355	ATP1A3
36	-0.0200083	0.0200083	IFI6
37	-0.0199625	0.0199625	PJA2
38	0.0198974	0.0198974	HIST1H4C
39	-0.0197424	0.0197424	SDC3
40	-0.0193666	0.0193666	GPM6A
41	-0.01932	0.01932	APOE
42	0.0192717	0.0192717	GOLGA2
43	0.0191243	0.0191243	FBXL22
44	0.0185391	0.0185391	ATP6V0C
45	0.0181905	0.0181905	BLZF1
46	-0.0181149	0.0181149	NPIPA1
47	0.0179525	0.0179525	RPL4
48	-0.0178362	0.0178362	CHN1
49	-0.0175705	0.0175705	PMP2
50	-0.0174969	0.0174969	HSPA1B
51	-0.0169346	0.0169346	SV2B
52	0.0169338	0.0169338	GLTSCR2
53	0.0168377	0.0168377	EEF1A1
54	0.0168334	0.0168334	SYAP1
55	-0.0168111	0.0168111	LLPH
56	-0.016405	0.016405	GP1BB
57	0.0162813	0.0162813	OLAH
58	0.0158004	0.0158004	H1F0
59	-0.0157072	0.0157072	VWF
60	-0.0155698	0.0155698	DDN
61	-0.0153931	0.0153931	RPL24
62	0.0153307	0.0153307	NDUFA4
63	0.0153081	0.0153081	CNOT2
64	-0.0151763	0.0151763	FTH1
65	-0.0151542	0.0151542	TCF7
66	-0.015152	0.015152	TAGLN3
67	0.0151406	0.0151406	PNPLA8
68	-0.0149579	0.0149579	CPE
69	0.0146572	0.0146572	RPL11
70	0.0146209	0.0146209	RPS14
71	-0.0146002	0.0146002	GLUD1
72	0.0145643	0.0145643	ZIC2
73	0.014444	0.014444	REEP5
74	0.0142877	0.0142877	SPP1
75	-0.0142207	0.0142207	SEPT5
76	-0.0141999	0.0141999	HBB
77	0.0141584	0.0141584	ZIC1
78	-0.0140322	0.0140322	ATP6V1B2
79	0.0139883	0.0139883	PDLIM5
80	0.0138641	0.0138641	MSH3
81	0.0137712	0.0137712	NEFH
82	-0.0137393	0.0137393	PRRT2
83	-0.0135562	0.0135562	IFITM3
84	0.0135461	0.0135461	CKB
85	0.0135446	0.0135446	PFKP
86	0.0135078	0.0135078	NUCKS1
87	-0.0134606	0.0134606	TUBA1A
88	0.0134365	0.0134365	PTMA
89	-0.0134206	0.0134206	ENO2
90	-0.0133953	0.0133953	CELF5
91	-0.0133726	0.0133726	ZNF623
92	-0.0133712	0.0133712	RPS26
93	-0.013357	0.013357	WSB2
94	0.0133519	0.0133519	RPL5
95	0.0133346	0.0133346	MAPK3
96	0.0133317	0.0133317	CBX6
97	0.0133025	0.0133025	SPOP
98	-0.0132576	0.0132576	SEPT2
99	-0.0132495	0.0132495	SNAPC1
100	0.0130748	0.0130748	PSMA7
101	-0.0129322	0.0129322	ELMOD3
102	0.0129298	0.0129298	PTGDS
103	0.012886	0.012886	YWHAH
104	0.0128618	0.0128618	EEF1G
105	-0.0127553	0.0127553	METTL7A
106	0.012721	0.012721	CCNI
107	0.0127111	0.0127111	PSMC5
108	0.0126334	0.0126334	RPL35
109	-0.0125745	0.0125745	RPL41
110	-0.0124796	0.0124796	ZNF492
111	0.0124172	0.0124172	ALKBH5
112	-0.012362	0.012362	RTN1
113	0.0122429	0.0122429	STOX2
114	0.0122086	0.0122086	CALM1
115	-0.0121551	0.0121551	TSPOAP1
116	-0.0121171	0.0121171	RGS4
117	0.01208	0.01208	MT1G
118	0.0120709	0.0120709	RPS24
119	-0.0119201	0.0119201	SNX10
120	0.011827	0.011827	MT2A
121	-0.0117554	0.0117554	GAP43
122	-0.0117388	0.0117388	CYP4F3
123	-0.0117348	0.0117348	PPP2R1A
124	-0.0113655	0.0113655	ARPC3
125	-0.0113373	0.0113373	ENC1
126	0.0113	0.0113	DIP2B
127	-0.0111618	0.0111618	UQCR10
128	0.0111548	0.0111548	TPT1
129	-0.0111415	0.0111415	CTXN1
130	-0.0111141	0.0111141	PPDPF
131	-0.0109865	0.0109865	HEY1
132	0.0109818	0.0109818	PEG3
133	-0.01097	0.01097	STXBP4
134	0.0109572	0.0109572	MT1H
135	0.0109527	0.0109527	SLPI
136	0.0109351	0.0109351	ADD3
137	0.0109334	0.0109334	LMTK3
138	0.0107801	0.0107801	ZNF665
139	-0.0107764	0.0107764	PRNP
140	-0.0107552	0.0107552	AHCYL1
141	0.0107476	0.0107476	MXD4
142	-0.0106638	0.0106638	DDAH1
143	-0.0106618	0.0106618	NRN1
144	-0.0104993	0.0104993	CIT
145	-0.0104441	0.0104441	HSP90AB1
146	-0.0104049	0.0104049	SRP14
147	-0.0103976	0.0103976	ATP6V1E1
148	0.0103229	0.0103229	RPS25
149	-0.0103073	0.0103073	TMBIM6
150	-0.0103059	0.0103059	ATP6V0A1
151	-0.0102646	0.0102646	DYNC1H1
152	0.010238	0.010238	RERE
153	0.0101956	0.0101956	TRIM74
154	-0.0101443	0.0101443	EID1
155	-0.010133	0.010133	TUBB2A
156	-0.0100857	0.0100857	MGEA5
157	0.010081	0.010081	MRAS
158	-0.0100758	0.0100758	CALY
159	0.0100476	0.0100476	ARSK
160	-0.0100249	0.0100249	SPARCL1
161	-0.00999955	0.00999955	GJA1
162	-0.00997437	0.00997437	TPP1
163	0.00997251	0.00997251	S100A6
164	0.00996046	0.00996046	H1FX
165	0.0099433	0.0099433	TMBIM4
166	0.00994026	0.00994026	GPRC5B
167	-0.00986868	0.00986868	NAPB
168	-0.00986746	0.00986746	CST3
169	0.00985277	0.00985277	NACA
170	0.00984923	0.00984923	RAMP1
171	0.00983748	0.00983748	RPL18A
172	0.00977977	0.00977977	RPS4Y1
173	-0.00975955	0.00975955	NRSN1
174	-0.00971579	0.00971579	PFKL
175	0.00969349	0.00969349	JUND
176	-0.00968998	0.00968998	ACADVL
177	0.00968372	0.00968372	LMO4
178	-0.0096822	0.0096822	TMEM9
179	0.00961592	0.00961592	MGLL
180	0.00960512	0.00960512	RELN
181	0.00957393	0.00957393	HINT1
182	0.00948466	0.00948466	VIM
183	-0.00945021	0.00945021	SRRM1
184	0.00940057	0.00940057	MIF
185	-0.00939002	0.00939002	BEX4
186	-0.00936473	0.00936473	NCS1
187	0.00935604	0.00935604	SYDE2
188	-0.00930538	0.00930538	COL16A1
189	0.00918992	0.00918992	CEBPD
190	0.00918982	0.00918982	RPL12
191	-0.00915524	0.00915524	FCGBP
192	0.0091299	0.0091299	PRKCB
193	-0.00912473	0.00912473	BAALC
194	-0.00905641	0.00905641	KLHL28
195	0.00905292	0.00905292	RBPJ
196	-0.00903324	0.00903324	ETNPPL
197	0.00900239	0.00900239	EEF1D
198	-0.00895317	0.00895317	SEPT7
199	-0.00893579	0.00893579	TUBA1C
200	-0.00890306	0.00890306	SVOP
201	0.00888024	0.00888024	ZNF358
202	-0.00886783	0.00886783	CSAD
203	-0.00885068	0.00885068	NPTX2
204	-0.0088268	0.0088268	ISG15
205	0.00881487	0.00881487	CDC42EP4
206	-0.00881214	0.00881214	VSNL1
207	-0.00879794	0.00879794	UBC
208	0.00879174	0.00879174	YPEL5
209	0.00878545	0.00878545	METTL21A
210	0.00876812	0.00876812	NRGN
211	-0.0087569	0.0087569	PPIAL4A
212	0.00870824	0.00870824	DUSP3
213	-0.00868643	0.00868643	RPL37A
214	-0.00868314	0.00868314	TUBGCP4
215	0.00867671	0.00867671	SLFN13
216	-0.00867514	0.00867514	NDUFC2
217	0.00867503	0.00867503	ZNF454
218	-0.00866227	0.00866227	SIRPA
219	0.00863545	0.00863545	RPL18
220	0.00863452	0.00863452	CNST
221	0.0085592	0.0085592	APOD
222	0.00854155	0.00854155	ELK1
223	0.00852751	0.00852751	PHGDH
224	-0.00851549	0.00851549	GDI1
225	-0.00849588	0.00849588	CA11
226	0.00847888	0.00847888	SMG1
227	0.00845055	0.00845055	MARK2
228	0.0084358	0.0084358	SERBP1
229	0.00840668	0.00840668	CCK
230	-0.00839178	0.00839178	INF2
231	0.00837947	0.00837947	RPS4X
232	-0.00835127	0.00835127	UBA52
233	0.00830866	0.00830866	PLEKHA1
234	0.00829887	0.00829887	2022-03-06
235	-0.00827454	0.00827454	ATP5G1
236	0.00826481	0.00826481	SH3BGRL3
237	-0.00826365	0.00826365	ICAM5
238	-0.0082373	0.0082373	HARS
239	-0.00820198	0.00820198	ZNF667
240	0.00817267	0.00817267	GPR37
241	-0.00811983	0.00811983	RPS27
242	-0.00811399	0.00811399	ITM2C
243	-0.00810137	0.00810137	RPSA
244	-0.00810107	0.00810107	TBC1D32
245	0.0080909	0.0080909	ZNF580
246	0.00807145	0.00807145	C5orf24
247	0.00806813	0.00806813	CLSTN1
248	0.00806791	0.00806791	HDAC4
249	-0.00806577	0.00806577	RGS11
250	0.00804464	0.00804464	HSD17B7
251	-0.0080426	0.0080426	HBD
252	0.00802156	0.00802156	GNAI2
253	0.00799674	0.00799674	RPL23A
254	-0.00799495	0.00799495	HAUS2
255	0.00798556	0.00798556	CYP1B1
256	-0.00798395	0.00798395	LDHB
257	0.00797705	0.00797705	FBXO2
258	-0.00795506	0.00795506	ATP6V1D
259	0.00794197	0.00794197	TCEAL2
260	0.00787535	0.00787535	CDK2AP1
261	-0.00787233	0.00787233	APOBEC3A
262	0.00783326	0.00783326	CRABP1
263	-0.00782789	0.00782789	RPL37
264	0.00781291	0.00781291	C2orf15
265	0.00781209	0.00781209	MAP6D1
266	0.00779675	0.00779675	RPS6
267	-0.00778627	0.00778627	EIF1
268	-0.00778148	0.00778148	SCD
269	0.00777606	0.00777606	RPLP1
270	0.00774288	0.00774288	ARL6IP5
271	-0.00771998	0.00771998	CHD5
272	0.00770376	0.00770376	ZBTB7A
273	0.00769787	0.00769787	TRIM44
274	0.00769643	0.00769643	SET
275	0.00769469	0.00769469	SOD1
276	-0.00768103	0.00768103	MAP2
277	0.00765781	0.00765781	PVALB
278	0.00765294	0.00765294	DYNLL1
279	-0.00765063	0.00765063	NOMO1
280	-0.00761316	0.00761316	NDUFA5
281	0.0076084	0.0076084	POU2F1
282	-0.0075066	0.0075066	PON2
283	0.00748678	0.00748678	TCF4
284	0.00748334	0.00748334	CAMK1D
285	-0.00746221	0.00746221	RPS10
286	0.00744658	0.00744658	RPS3
287	0.00744213	0.00744213	AGO2
288	0.00743463	0.00743463	KCNJ10
289	0.00742821	0.00742821	APCDD1
290	0.00741615	0.00741615	RPS23
291	0.00740243	0.00740243	FOSB
292	0.0073683	0.0073683	CHGB
293	-0.00736596	0.00736596	CDK5RAP3
294	0.00735248	0.00735248	SNAP25
295	-0.00734278	0.00734278	SERPINA3
296	-0.00733638	0.00733638	AQP1
297	0.00732818	0.00732818	TEP1
298	-0.00730248	0.00730248	CDK14
299	-0.00728045	0.00728045	RAPGEF4
300	-0.00726622	0.00726622	STMN3
301	0.00726005	0.00726005	LPIN1
302	-0.00725686	0.00725686	CHCHD2
303	0.00723412	0.00723412	RHOBTB3
304	-0.00722064	0.00722064	ATG10
305	0.00721613	0.00721613	SLC47A1
306	-0.00720816	0.00720816	SPRED1
307	-0.0071935	0.0071935	SAT1
308	-0.00718817	0.00718817	TMEM158
309	-0.00718721	0.00718721	EIF3C
310	-0.00717842	0.00717842	ATP5B
311	-0.00717394	0.00717394	MSRB3
312	-0.00715529	0.00715529	ARGLU1
313	-0.0071423	0.0071423	ZNF33A
314	0.00713185	0.00713185	EEF1A2
315	-0.00713095	0.00713095	BCAS1
316	0.00711202	0.00711202	HP
317	-0.00709801	0.00709801	PPP3R1
318	-0.00709633	0.00709633	FGFR3
319	0.00708869	0.00708869	NDUFB4
320	-0.00708724	0.00708724	RIMBP2
321	0.00708451	0.00708451	WDR34
322	-0.00706478	0.00706478	ATP1A2
323	-0.00705795	0.00705795	OAZ2
324	0.00704567	0.00704567	S100A13
325	0.00702717	0.00702717	RPS21
326	0.0070249	0.0070249	DUSP8
327	0.00702266	0.00702266	ATP5A1
328	0.00701709	0.00701709	MTCH1
329	0.00701389	0.00701389	GDPD1
330	-0.00699508	0.00699508	NARS
331	0.00699026	0.00699026	CLPTM1
332	-0.00698975	0.00698975	RGL1
333	-0.00698028	0.00698028	XRCC5
334	0.00695209	0.00695209	PBOV1
335	-0.00694178	0.00694178	BSCL2
336	-0.00693655	0.00693655	NDUFV1
337	-0.00690047	0.00690047	KIFC2
338	-0.00684181	0.00684181	HTRA1
339	-0.00681729	0.00681729	ADIRF
340	0.00680455	0.00680455	SLITRK4
341	-0.00679973	0.00679973	HSD17B12
342	0.00677213	0.00677213	ATP1B1
343	-0.00668786	0.00668786	RAB10
344	-0.00666817	0.00666817	SKP1
345	-0.0066655	0.0066655	FASN
346	0.00666487	0.00666487	COBL
347	0.00665978	0.00665978	COX5A
348	-0.00665247	0.00665247	STAT2
349	-0.00664007	0.00664007	NDRG2
350	0.00664003	0.00664003	SCN11A
351	-0.00662145	0.00662145	ALPP
352	0.0065957	0.0065957	SLC38A2
353	-0.00659412	0.00659412	TYMP
354	0.0065813	0.0065813	ZRANB1
355	0.00655418	0.00655418	BTG1
356	0.00655144	0.00655144	VGLL4
357	0.00653588	0.00653588	RACK1
358	-0.00652406	0.00652406	FAHD2A
359	0.00652406	0.00652406	FOXP1
360	-0.00652343	0.00652343	RAP1GAP
361	0.00651336	0.00651336	GRIA2
362	0.00650539	0.00650539	RRAGC
363	-0.00650426	0.00650426	SARAF
364	0.00650241	0.00650241	RPS3A
365	0.00647487	0.00647487	KCNB1
366	0.0064743	0.0064743	BLOC1S1
367	0.00647414	0.00647414	SH3GL2
368	0.00647278	0.00647278	WDR82
369	-0.0064722	0.0064722	MT1X
370	-0.0064713	0.0064713	COX4I1
371	-0.00646938	0.00646938	PAM
372	-0.00646113	0.00646113	SNCG
373	-0.00644027	0.00644027	SCN2A
374	0.00643385	0.00643385	COX7C
375	0.00642338	0.00642338	ATP1A1
376	0.00641833	0.00641833	DUSP19
377	0.00641278	0.00641278	RCAN2
378	0.00640936	0.00640936	NWD1
379	0.00640181	0.00640181	CEMIP
380	0.00638515	0.00638515	KPNA6
381	0.00637926	0.00637926	CXXC5
382	-0.00636848	0.00636848	BEX1
383	-0.00636186	0.00636186	C2CD5
384	0.00636117	0.00636117	RDH11
385	0.00635506	0.00635506	ZNF136
386	-0.00634917	0.00634917	FAIM2
387	-0.00634152	0.00634152	PSAT1
388	0.00634019	0.00634019	TTR
389	0.00633157	0.00633157	NT5C2
390	-0.00632359	0.00632359	PCDHB9
391	0.00632071	0.00632071	FEZ1
392	-0.00631103	0.00631103	SMIM14
393	0.00626924	0.00626924	CUEDC1
394	-0.00625558	0.00625558	BNIP3
395	-0.00624804	0.00624804	NPTN
396	0.00624762	0.00624762	PTPRN
397	0.0062431	0.0062431	MCM8
398	-0.00623444	0.00623444	GPT2
399	-0.00623141	0.00623141	MAN2C1
400	0.00622673	0.00622673	APLNR
401	-0.00622179	0.00622179	PDK4
402	0.00621738	0.00621738	PTTG1IP
403	-0.00620057	0.00620057	FABP5
404	-0.00616078	0.00616078	RPS27L
405	0.00616052	0.00616052	ZFYVE9
406	-0.00614068	0.00614068	CLIP3
407	0.00611448	0.00611448	ZYG11B
408	0.0061075	0.0061075	RGMA
409	-0.00609475	0.00609475	TMSB4X
410	-0.00607904	0.00607904	RTN3
411	-0.00607821	0.00607821	CHMP4B
412	0.00607287	0.00607287	HLA-DPB1
413	-0.00606009	0.00606009	MRPL24
414	-0.00605376	0.00605376	KLF9
415	0.00605285	0.00605285	TTC17
416	0.00604632	0.00604632	GABRA1
417	-0.00604483	0.00604483	SPCS1
418	0.00603058	0.00603058	PA2G4
419	-0.00602814	0.00602814	RPS20
420	-0.00601025	0.00601025	RPH3A
421	-0.00600924	0.00600924	CES4A
422	-0.00600325	0.00600325	HBA1
423	-0.00598422	0.00598422	CACNG3
424	-0.00597431	0.00597431	TRA2A
425	-0.0059738	0.0059738	CCDC88B
426	-0.00595423	0.00595423	TMEM59L
427	-0.00594577	0.00594577	SPOCK1
428	-0.00593939	0.00593939	DNAJA2
429	-0.00593469	0.00593469	SCRG1
430	0.00592568	0.00592568	FAU
431	0.00591089	0.00591089	RYBP
432	0.00588615	0.00588615	VEZF1
433	0.00586134	0.00586134	DUSP26
434	0.00585253	0.00585253	RAD51B
435	-0.00584525	0.00584525	GCSH
436	-0.00582834	0.00582834	TUBB4B
437	0.00582452	0.00582452	HSPA6
438	-0.00580781	0.00580781	FEZ2
439	0.00580354	0.00580354	PIH1D3
440	0.00580073	0.00580073	ACSS1
441	-0.00579464	0.00579464	TSC22D1
442	-0.00578398	0.00578398	MYH10
443	-0.00578389	0.00578389	RNASET2
444	0.00578365	0.00578365	KLHDC3
445	-0.00578206	0.00578206	HBA2
446	0.0057744	0.0057744	FAM19A5
447	0.00574122	0.00574122	REEP2
448	0.00574001	0.00574001	NR2F1
449	-0.00573894	0.00573894	TBCA
450	0.00573692	0.00573692	OPTN
451	0.00573272	0.00573272	ABLIM1
452	-0.00570651	0.00570651	PDHB
453	0.00568562	0.00568562	ATCAY
454	0.00567824	0.00567824	CERS6
455	-0.00567438	0.00567438	PTPRZ1
456	0.00565773	0.00565773	HAPLN4
457	0.00565619	0.00565619	SPHAR
458	-0.00565563	0.00565563	TKT
459	0.00565364	0.00565364	TMEM246
460	0.00565095	0.00565095	DBT
461	-0.00564726	0.00564726	NRCAM
462	0.00564504	0.00564504	NFIA
463	-0.00564216	0.00564216	STK39
464	0.0056307	0.0056307	U2AF1
465	0.00562964	0.00562964	CYTH1
466	-0.00562892	0.00562892	HES4
467	0.00561451	0.00561451	RPLP2
468	0.00561143	0.00561143	DYNC1LI2
469	-0.00560421	0.00560421	UBB
470	-0.0055921	0.0055921	NDRG4
471	0.00558562	0.00558562	LRRC47
472	0.00557618	0.00557618	ATP1B3
473	0.00556649	0.00556649	ANKRD44
474	0.00554606	0.00554606	ADGRG1
475	0.0055415	0.0055415	ERCC5
476	0.00554035	0.00554035	VWA1
477	-0.0055366	0.0055366	RPL27
478	0.00553586	0.00553586	ILK
479	0.00553539	0.00553539	KCNK12
480	-0.00553415	0.00553415	RAB15
481	0.00553079	0.00553079	PTOV1
482	0.00551697	0.00551697	YBX1
483	-0.0055001	0.0055001	MANF
484	0.00549877	0.00549877	GNL3L
485	-0.00549241	0.00549241	LHX2
486	0.0054818	0.0054818	SLC38A1
487	-0.0054782	0.0054782	FADS2
488	-0.00546724	0.00546724	IDO2
489	0.00546701	0.00546701	LARP1
490	-0.00546097	0.00546097	SPC24
491	-0.00545704	0.00545704	AK3
492	0.00545562	0.00545562	LMO3
493	0.00545053	0.00545053	GAD2
494	-0.00544935	0.00544935	SRSF5
495	-0.00544851	0.00544851	SHTN1
496	0.00543982	0.00543982	MAPK8IP3
497	0.00543428	0.00543428	PFDN5
498	0.00543357	0.00543357	RPS8
499	0.00542265	0.00542265	POLR2I
500	0.0054167	0.0054167	ZNF671
501	-0.00541265	0.00541265	NPY
502	0.00540021	0.00540021	KIAA1109
503	-0.00538777	0.00538777	RPL26
504	-0.00538591	0.00538591	ATP1B2
505	0.00538203	0.00538203	POU3F2
506	-0.00537704	0.00537704	HSPA9
507	0.00537566	0.00537566	TMEM245
508	0.00536227	0.00536227	EXOSC2
509	0.00536141	0.00536141	POLR2F
510	-0.00535832	0.00535832	RAB40C
511	-0.00533896	0.00533896	ATP6V0B
512	-0.00533606	0.00533606	STOM
513	0.00533196	0.00533196	DAAM2
514	-0.00532956	0.00532956	ATPAF1
515	0.00531883	0.00531883	ZNF430
516	-0.00531826	0.00531826	FKBP1A
517	0.0053107	0.0053107	ZCCHC24
518	-0.00530704	0.00530704	TOMM34
519	-0.00529755	0.00529755	TSC22D4
520	0.00529272	0.00529272	PUM1
521	-0.00528996	0.00528996	UBXN2A
522	-0.00527871	0.00527871	TMEM59
523	0.00526332	0.00526332	MRPL57
524	-0.00525892	0.00525892	NUAK1
525	-0.00525624	0.00525624	SLC7A11
526	-0.0052552	0.0052552	CABP1
527	0.00525512	0.00525512	SLC24A3
528	0.00524261	0.00524261	ZNF428
529	0.00524064	0.00524064	MAST1
530	-0.00523442	0.00523442	IL18
531	-0.00521003	0.00521003	TMEM256
532	0.00520963	0.00520963	CCT7
533	-0.00520893	0.00520893	PCNT
534	-0.00520448	0.00520448	HOPX
535	-0.00520077	0.00520077	NDUFA10
536	-0.00519458	0.00519458	PPP2R2C
537	-0.00519275	0.00519275	VSIG1
538	0.00519064	0.00519064	PAFAH1B3
539	-0.00518946	0.00518946	ZMAT3
540	0.00518653	0.00518653	ZDHHC8
541	-0.00518254	0.00518254	DMC1
542	-0.00517811	0.00517811	IL4R
543	0.00517432	0.00517432	CLCN7
544	-0.00517242	0.00517242	LYRM1
545	0.00517161	0.00517161	GAPDH
546	-0.00516926	0.00516926	NDUFB5
547	0.00515858	0.00515858	THUMPD1
548	0.00513877	0.00513877	YWHAG
549	0.00513001	0.00513001	SIPA1L1
550	-0.00511934	0.00511934	ZDHHC23
551	0.00511893	0.00511893	SRGAP3
552	0.0051149	0.0051149	SLC25A18
553	-0.00511084	0.00511084	TACC1
554	-0.00510982	0.00510982	CTSB
555	-0.0051021	0.0051021	NEUROD6
556	-0.00509845	0.00509845	FERMT2
557	-0.00509453	0.00509453	TMBIM1
558	0.00508454	0.00508454	ALS2
559	0.0050685	0.0050685	SNTA1
560	0.00504335	0.00504335	PIAS4
561	-0.00504198	0.00504198	DAPP1
562	-0.00503977	0.00503977	RTN4
563	0.00502584	0.00502584	CAPN1
564	0.00502538	0.00502538	MAPK8IP1
565	0.00501709	0.00501709	COASY
566	-0.00500934	0.00500934	NDP
567	0.00500859	0.00500859	MAP1A
568	-0.00500477	0.00500477	HDDC2
569	0.00499616	0.00499616	SLC5A3
570	0.004977	0.004977	TBCB
571	0.00497318	0.00497318	RASEF
572	0.00496182	0.00496182	PAX6
573	-0.00495261	0.00495261	COX8A
574	-0.00495016	0.00495016	AP2B1
575	0.00494088	0.00494088	EEF2
576	-0.00493982	0.00493982	MAL
577	-0.00493624	0.00493624	TMEM74B
578	-0.00492333	0.00492333	TSPAN18
579	-0.00492172	0.00492172	YPEL3
580	-0.00490524	0.00490524	EXOC6B
581	0.00490092	0.00490092	CNIH2
582	0.00489594	0.00489594	ATRX
583	0.00489517	0.00489517	SLC1A2
584	-0.0048913	0.0048913	SCAP
585	0.00488746	0.00488746	ARHGAP1
586	-0.00488603	0.00488603	F3
587	-0.00488603	0.00488603	CCKBR
588	0.00488601	0.00488601	DNER
589	0.00486228	0.00486228	OLFM1
590	-0.00485742	0.00485742	MAOA
591	0.00484749	0.00484749	HIST1H1C
592	-0.00484745	0.00484745	BCL2L2
593	-0.00484622	0.00484622	PLLP
594	-0.00484369	0.00484369	ENO1
595	-0.00483857	0.00483857	GPR137B
596	0.00483466	0.00483466	AVPI1
597	0.00483262	0.00483262	PDCD7
598	-0.0048316	0.0048316	AP3S1
599	0.00481253	0.00481253	RABEP1
600	-0.00481031	0.00481031	OLIG2
601	0.00480895	0.00480895	MKRN1
602	-0.00480531	0.00480531	CHMP5
603	0.00480409	0.00480409	NDUFS8
604	-0.00480201	0.00480201	SGIP1
605	0.00479601	0.00479601	ZNF264
606	0.00479276	0.00479276	DPF1
607	-0.00478736	0.00478736	UCHL1
608	-0.00478643	0.00478643	TMEM175
609	-0.00477992	0.00477992	SNRNP70
610	0.00477783	0.00477783	ZFR
611	0.00477212	0.00477212	RBM14
612	-0.00477117	0.00477117	NEDD8
613	0.00476956	0.00476956	TMEM51
614	-0.00475723	0.00475723	N4BP2L1
615	0.00474133	0.00474133	C1orf43
616	0.00473916	0.00473916	FYN
617	0.00473748	0.00473748	CCDC3
618	-0.0047326	0.0047326	ACO1
619	0.00473258	0.00473258	UBE4A
620	-0.00472991	0.00472991	CCDC14
621	0.00472615	0.00472615	SYT13
622	0.00472157	0.00472157	PSMD11
623	0.00471815	0.00471815	SIK3
624	-0.0046936	0.0046936	TMEM63A
625	-0.00467426	0.00467426	PAAF1
626	-0.00467417	0.00467417	MUM1L1
627	0.00467013	0.00467013	RAB3IL1
628	0.00466911	0.00466911	PAG1
629	0.00466627	0.00466627	VASP
630	0.00466298	0.00466298	TK2
631	-0.00465591	0.00465591	NAA10
632	0.00465483	0.00465483	CSDE1
633	0.00465399	0.00465399	DCN
634	0.00464833	0.00464833	SLC13A4
635	-0.00464619	0.00464619	RPS7
636	0.00464428	0.00464428	RPL3
637	-0.00464243	0.00464243	SPRY2
638	-0.0046337	0.0046337	GARNL3
639	-0.0046246	0.0046246	SULF2
640	0.00462349	0.00462349	JDP2
641	-0.00461783	0.00461783	TUBA1B
642	-0.00461464	0.00461464	DCAF8
643	-0.00460761	0.00460761	KLK7
644	-0.00460286	0.00460286	VPS8
645	0.00460107	0.00460107	EMID1
646	0.00459902	0.00459902	PTCHD1
647	-0.00459504	0.00459504	CDK9
648	-0.00459496	0.00459496	LYRM5
649	0.00458507	0.00458507	SLC22A23
650	0.00458186	0.00458186	ANKLE1
651	0.00457213	0.00457213	AP2S1
652	0.00456943	0.00456943	RAB11FIP4
653	0.00456878	0.00456878	CYLD
654	-0.00456875	0.00456875	KYAT1
655	-0.00456816	0.00456816	CAMLG
656	-0.00456671	0.00456671	RRAGD
657	0.00455357	0.00455357	GPR155
658	0.00454083	0.00454083	GOLIM4
659	-0.00454031	0.00454031	CCDC90B
660	-0.00453866	0.00453866	SMAD6
661	-0.00452939	0.00452939	CPLX1
662	0.0045254	0.0045254	FUT6
663	-0.00451876	0.00451876	MGST3
664	0.00451604	0.00451604	MSI1
665	-0.00450668	0.00450668	AHSA2
666	0.00450595	0.00450595	CRLF1
667	-0.00450472	0.00450472	AIRE
668	0.00450334	0.00450334	ITM2A
669	0.00449907	0.00449907	ANKRD9
670	-0.00449584	0.00449584	ARNT2
671	-0.00449188	0.00449188	ASPHD1
672	-0.0044902	0.0044902	PPP2CA
673	0.00449003	0.00449003	PPM1K
674	-0.00448058	0.00448058	EVL
675	-0.00447702	0.00447702	GRIPAP1
676	-0.0044765	0.0044765	WBP1
677	-0.00447624	0.00447624	CA10
678	-0.00447468	0.00447468	RPL21
679	-0.00447005	0.00447005	PSMB3
680	0.00447002	0.00447002	SRP72
681	-0.00446592	0.00446592	SLC30A3
682	-0.00446013	0.00446013	TTC3
683	-0.00444832	0.00444832	HBQ1
684	0.00444336	0.00444336	CHN2
685	-0.00444228	0.00444228	SDF2L1
686	0.00443278	0.00443278	SNRPD3
687	-0.0044327	0.0044327	DTNB
688	-0.00442818	0.00442818	SLITRK2
689	-0.00442652	0.00442652	GLO1
690	0.00442393	0.00442393	PODXL2
691	0.00442382	0.00442382	MID1IP1
692	0.00442372	0.00442372	IRF2BPL
693	0.00441873	0.00441873	GRIN1
694	0.00441843	0.00441843	SETBP1
695	0.00441332	0.00441332	COLGALT2
696	-0.00441135	0.00441135	HSPB8
697	-0.00441038	0.00441038	LETMD1
698	0.00441004	0.00441004	DTX3
699	0.00440579	0.00440579	SASH1
700	-0.00439649	0.00439649	DLGAP2
701	0.00439184	0.00439184	XIAP
702	-0.00436841	0.00436841	MLLT1
703	-0.00436829	0.00436829	CBFB
704	0.0043626	0.0043626	AMER2
705	0.00435107	0.00435107	EFHD1
706	-0.00435063	0.00435063	PRR13
707	0.00434456	0.00434456	RPL36
708	0.00434096	0.00434096	RPN2
709	-0.00434042	0.00434042	AP1G2
710	-0.00433613	0.00433613	SYP
711	-0.00433461	0.00433461	2022-03-02
712	-0.00433354	0.00433354	FAM98A
713	0.00433264	0.00433264	DIP2C
714	0.00432947	0.00432947	H3F3A
715	-0.00432922	0.00432922	APOLD1
716	0.0043281	0.0043281	PSD2
717	0.00432661	0.00432661	ISYNA1
718	-0.00432372	0.00432372	ZNF419
719	-0.00431677	0.00431677	DCLK1
720	0.00431156	0.00431156	DNAJA1
721	0.00430774	0.00430774	CAP2
722	0.00430747	0.00430747	SCN1A
723	0.0043048	0.0043048	PCBP1
724	0.00430442	0.00430442	EZR
725	-0.00429447	0.00429447	RHOT2
726	0.00429181	0.00429181	YPEL4
727	-0.00428455	0.00428455	FADS1
728	-0.00428403	0.00428403	B2M
729	-0.00428305	0.00428305	NDUFS7
730	-0.00427847	0.00427847	ERAP2
731	0.00427774	0.00427774	GNAO1
732	0.00427623	0.00427623	NFKBIA
733	-0.00427553	0.00427553	S1PR1
734	0.00427552	0.00427552	TIMP1
735	-0.0042745	0.0042745	FBXO15
736	0.00427376	0.00427376	RPL10A
737	0.00426807	0.00426807	VPS26A
738	0.00426457	0.00426457	FN3K
739	-0.00425522	0.00425522	UBAC1
740	-0.00425375	0.00425375	S100A1
741	-0.00424754	0.00424754	NPEPL1
742	0.0042388	0.0042388	BAG6
743	-0.00423815	0.00423815	UBE2V1
744	-0.00423708	0.00423708	CANX
745	-0.00423697	0.00423697	HDGFRP3
746	-0.00422635	0.00422635	ARPC5L
747	-0.00422619	0.00422619	HDHD2
748	-0.00421698	0.00421698	SS18L2
749	-0.00421614	0.00421614	GSDMB
750	0.00421254	0.00421254	VPS35
751	-0.00420951	0.00420951	CAST
752	0.00420759	0.00420759	YWHAE
753	0.00420461	0.00420461	SEC31A
754	-0.0042033	0.0042033	RAB5B
755	0.00420309	0.00420309	BGN
756	-0.00420187	0.00420187	OPALIN
757	0.00420182	0.00420182	SLIRP
758	-0.00419536	0.00419536	TAP1
759	-0.00418597	0.00418597	PFDN2
760	-0.0041834	0.0041834	MICAL2
761	0.00418122	0.00418122	SWSAP1
762	-0.00418071	0.00418071	HSPB1
763	0.00417831	0.00417831	TAF15
764	0.00417424	0.00417424	MEF2C
765	0.00416986	0.00416986	SEPT9
766	-0.00416545	0.00416545	CMTM5
767	-0.00416408	0.00416408	CCNL2
768	0.00415626	0.00415626	H3F3B
769	0.00415096	0.00415096	YTHDC1
770	0.00414646	0.00414646	TRMT112
771	-0.00414495	0.00414495	NECAB2
772	-0.0041441	0.0041441	TPI1
773	0.00414269	0.00414269	ZFHX2
774	0.00414063	0.00414063	SART1
775	0.00412472	0.00412472	IGFBP4
776	0.00412463	0.00412463	GNAS
777	0.00412342	0.00412342	MRPL16
778	-0.00411747	0.00411747	QDPR
779	-0.00411254	0.00411254	SSBP2
780	-0.00410377	0.00410377	CTSA
781	0.00409723	0.00409723	NAA38
782	-0.00409676	0.00409676	C1QA
783	0.00409529	0.00409529	CDH2
784	0.00409168	0.00409168	PARD6A
785	0.00409053	0.00409053	MRPS23
786	-0.00408832	0.00408832	KIAA0513
787	0.00408788	0.00408788	EGR1
788	-0.00408689	0.00408689	ATP5O
789	0.00407909	0.00407909	APC2
790	-0.00407898	0.00407898	PAN2
791	-0.00407829	0.00407829	SLC2A8
792	0.00407759	0.00407759	LSS
793	-0.00407153	0.00407153	GNPDA1
794	0.00406995	0.00406995	MLF2
795	-0.00406987	0.00406987	INTS7
796	0.00406758	0.00406758	ATXN2
797	-0.00406748	0.00406748	TRAPPC2L
798	0.00406699	0.00406699	SIVA1
799	-0.00406615	0.00406615	PTPN11
800	0.00406063	0.00406063	TOMM40L
801	-0.00406018	0.00406018	SMAD3
802	0.00405875	0.00405875	VHL
803	0.00405834	0.00405834	SYNJ2BP
804	0.00405799	0.00405799	KAT6A
805	-0.00405144	0.00405144	PFKM
806	0.00405001	0.00405001	SATB1
807	0.00404282	0.00404282	SAFB2
808	-0.00403238	0.00403238	AMY1A
809	0.00402783	0.00402783	MTIF3
810	-0.0040274	0.0040274	GANAB
811	0.00402705	0.00402705	NPAS4
812	0.00402546	0.00402546	EIF2B4
813	-0.00402193	0.00402193	TADA3
814	0.00401835	0.00401835	ELAVL3
815	0.0040109	0.0040109	LRRFIP1
816	-0.00400678	0.00400678	BAG3
817	-0.00400294	0.00400294	GABARAPL1
818	0.00400242	0.00400242	N4BP1
819	0.00399527	0.00399527	FAM13B
820	-0.00399076	0.00399076	NAGPA
821	-0.00398897	0.00398897	RASAL1
822	-0.0039884	0.0039884	KLHDC9
823	0.00398382	0.00398382	RPL13A
824	0.00397858	0.00397858	UBE2R2
825	0.00397197	0.00397197	CHRNA5
826	-0.00396757	0.00396757	TMEM141
827	-0.00396482	0.00396482	HLA-A
828	0.00396323	0.00396323	RABGAP1
829	-0.00396298	0.00396298	METTL2B
830	-0.00396274	0.00396274	PITHD1
831	-0.00396215	0.00396215	SLC25A11
832	0.00395545	0.00395545	GPX4
833	0.00394935	0.00394935	MTUS1
834	-0.00393909	0.00393909	RPL9
835	-0.00393807	0.00393807	PGK1
836	-0.00393718	0.00393718	NECAP1
837	-0.00393636	0.00393636	GPR1
838	-0.00393409	0.00393409	BCAN
839	-0.00393394	0.00393394	IL1B
840	0.00393191	0.00393191	GADD45G
841	-0.00393055	0.00393055	ECHS1
842	-0.00393054	0.00393054	ALDH2
843	0.0039291	0.0039291	RBM5
844	-0.00392357	0.00392357	PRKCG
845	-0.00392226	0.00392226	TRIB2
846	-0.00392221	0.00392221	MORF4L1
847	-0.00392163	0.00392163	KIFC3
848	-0.00392076	0.00392076	SLC48A1
849	0.00391885	0.00391885	KLF4
850	0.00391648	0.00391648	SPTAN1
851	0.00390363	0.00390363	PPP2R5B
852	0.00389775	0.00389775	UBL5
853	0.00389421	0.00389421	DDX17
854	-0.00389272	0.00389272	NSF
855	-0.0038921	0.0038921	CEPT1
856	0.00389187	0.00389187	TFIP11
857	-0.00389096	0.00389096	CYSTM1
858	0.00389051	0.00389051	CLN6
859	0.00389013	0.00389013	RPS6KB1
860	0.00389013	0.00389013	RUSC1
861	-0.00388826	0.00388826	DENND4C
862	-0.00388645	0.00388645	FAM120B
863	-0.00388504	0.00388504	BACE1
864	0.00388398	0.00388398	OGN
865	0.00388353	0.00388353	NFIC
866	0.00388225	0.00388225	ITPKB
867	0.00387742	0.00387742	DYNLRB1
868	-0.00387149	0.00387149	SCGB2A2
869	-0.00386982	0.00386982	RNF182
870	-0.00386953	0.00386953	PSMC3
871	-0.00386884	0.00386884	CTTNBP2NL
872	0.00386527	0.00386527	DDX27
873	0.00386494	0.00386494	RASIP1
874	-0.00386387	0.00386387	THBS4
875	0.00386238	0.00386238	KLHL42
876	-0.00386198	0.00386198	DENND3
877	-0.00385857	0.00385857	NDUFB8
878	0.00385701	0.00385701	SYNM
879	-0.003855	0.003855	CALM3
880	0.00385445	0.00385445	GATAD2A
881	-0.00385332	0.00385332	KMO
882	0.00385249	0.00385249	PPP4R1
883	0.00384826	0.00384826	TIPRL
884	-0.00384383	0.00384383	P4HTM
885	-0.00384246	0.00384246	GALNT2
886	-0.00384236	0.00384236	MORN1
887	0.00384154	0.00384154	RPL30
888	0.0038402	0.0038402	SRSF11
889	-0.00383907	0.00383907	FBXL16
890	0.00383158	0.00383158	IGF2
891	-0.00382941	0.00382941	GRM4
892	0.00382893	0.00382893	NPC2
893	-0.00382395	0.00382395	C6orf1
894	-0.00382341	0.00382341	SEPW1
895	0.00382283	0.00382283	SF1
896	0.00382263	0.00382263	UBQLN2
897	-0.00382056	0.00382056	CLIC4
898	0.00381689	0.00381689	ZMIZ1
899	-0.00381642	0.00381642	LAMP5
900	-0.00381635	0.00381635	SLC47A2
901	-0.00381622	0.00381622	PPIP5K1
902	-0.00381458	0.00381458	PRDM2
903	0.00381454	0.00381454	FAM104A
904	-0.00381343	0.00381343	HOXA5
905	-0.00381299	0.00381299	MYO18B
906	-0.00380638	0.00380638	EIF2S3
907	0.00380556	0.00380556	BRINP1
908	0.00380121	0.00380121	NEBL
909	-0.00380086	0.00380086	IMPA2
910	-0.00380031	0.00380031	ZNF620
911	0.00380017	0.00380017	MLLT11
912	0.00379798	0.00379798	LYN
913	0.00379763	0.00379763	RBPMS2
914	0.0037954	0.0037954	SCAMP4
915	0.0037947	0.0037947	ARHGEF12
916	-0.00379447	0.00379447	GCA
917	0.00379237	0.00379237	CALB1
918	-0.00379209	0.00379209	RAB14
919	-0.00378927	0.00378927	PRLHR
920	0.00378887	0.00378887	KIF3B
921	0.00378746	0.00378746	FOXO1
922	0.0037859	0.0037859	RARG
923	0.00378541	0.00378541	PRELP
924	-0.00378467	0.00378467	MSANTD3
925	-0.00378367	0.00378367	SUGP2
926	-0.00378082	0.00378082	ERGIC3
927	-0.00377987	0.00377987	EIF1B
928	0.00377672	0.00377672	IGFBP6
929	-0.00377167	0.00377167	PGM2L1
930	-0.00377101	0.00377101	EMG1
931	-0.00376926	0.00376926	PARP16
932	-0.00376785	0.00376785	DNAJB9
933	-0.00376561	0.00376561	KIAA0141
934	0.00376509	0.00376509	KRTAP19-7
935	0.00376303	0.00376303	ISCU
936	0.0037627	0.0037627	FLYWCH1
937	0.00376164	0.00376164	DYNC1I1
938	0.00376114	0.00376114	BRIX1
939	-0.00376058	0.00376058	RNF11
940	-0.00375899	0.00375899	2022-03-01
941	-0.00375467	0.00375467	TCTEX1D1
942	0.00375046	0.00375046	GPRC5A
943	-0.00374982	0.00374982	DNAL4
944	-0.00374933	0.00374933	RBM3
945	0.0037492	0.0037492	ALDH4A1
946	0.00374845	0.00374845	FABP7
947	0.00374706	0.00374706	VAMP2
948	0.00374442	0.00374442	MFGE8
949	-0.00374425	0.00374425	IL32
950	0.00374119	0.00374119	EIF4A1
951	0.00373845	0.00373845	CLIP2
952	0.0037379	0.0037379	ZNF577
953	-0.00373383	0.00373383	STX1A
954	0.00373207	0.00373207	MAST2
955	0.00372981	0.00372981	SEC61B
956	0.00372975	0.00372975	EPHB6
957	-0.00372773	0.00372773	FKBP1B
958	-0.00372594	0.00372594	CPNE6
959	-0.00372559	0.00372559	FIS1
960	-0.00372544	0.00372544	MRPL17
961	-0.00372228	0.00372228	GARS
962	-0.00372221	0.00372221	SYNE1
963	0.00372162	0.00372162	PTGFR
964	-0.00372149	0.00372149	CYP2C8
965	-0.00372071	0.00372071	BAP1
966	-0.00372048	0.00372048	ZFAND5
967	-0.00371979	0.00371979	ANKRD37
968	0.00371878	0.00371878	SV2A
969	-0.00371785	0.00371785	MAT2A
970	-0.0037147	0.0037147	RSAD2
971	-0.00371292	0.00371292	GSTK1
972	-0.00370947	0.00370947	RASL12
973	0.00370765	0.00370765	EPM2AIP1
974	0.00370741	0.00370741	MTSS1
975	-0.00370329	0.00370329	AK1
976	-0.00370176	0.00370176	RAC1
977	-0.00369958	0.00369958	SLC9A9
978	-0.00369788	0.00369788	PITPNB
979	0.0036967	0.0036967	USP20
980	-0.00369629	0.00369629	APOL3
981	0.00369083	0.00369083	HMGN3
982	-0.00368503	0.00368503	C10orf10
983	-0.00368385	0.00368385	TFRC
984	-0.00368069	0.00368069	SCARB2
985	0.00367851	0.00367851	PDHX
986	0.00367769	0.00367769	UBXN1
987	0.00367597	0.00367597	ARC
988	-0.00367596	0.00367596	FRMD6
989	0.00367251	0.00367251	KIT
990	0.00367057	0.00367057	DMAP1
991	0.00367032	0.00367032	AASS
992	-0.00366638	0.00366638	MAST3
993	0.00366601	0.00366601	EML1
994	-0.00366476	0.00366476	RPE
995	-0.00366341	0.00366341	SNCAIP
996	-0.00366222	0.00366222	ALG1L
997	0.00366218	0.00366218	GINM1
998	0.00366107	0.00366107	NPM1
999	0.00365719	0.00365719	SYT1
1000	-0.0036557	0.0036557	SDHD
1001	-0.00365531	0.00365531	PLA2G4D
1002	0.00365469	0.00365469	MAGEB6
1003	0.00365441	0.00365441	SFXN5
1004	-0.00365412	0.00365412	HIST1H1D
1005	0.00364944	0.00364944	SNRPB2
1006	0.00364915	0.00364915	C11orf1
1007	-0.00364834	0.00364834	CWF19L2
1008	0.00364747	0.00364747	PPP1CC
1009	0.00364503	0.00364503	CRMP1
1010	0.00364409	0.00364409	LYAR
1011	0.00364274	0.00364274	AKAP17A
1012	-0.00364265	0.00364265	HTR7
1013	0.00364169	0.00364169	SPRYD3
1014	-0.003638	0.003638	DUSP22
1015	0.00363533	0.00363533	PITPNM1
1016	0.00363375	0.00363375	MOK
1017	0.00363105	0.00363105	NECAB3
1018	-0.00362811	0.00362811	DDX58
1019	-0.00362594	0.00362594	MGST1
1020	-0.00362437	0.00362437	GSKIP
1021	-0.00362401	0.00362401	PPP1R3C
1022	0.00362271	0.00362271	CHRNG
1023	-0.00362242	0.00362242	PI16
1024	0.00362038	0.00362038	SMYD3
1025	0.00361821	0.00361821	KCNS2
1026	0.0036168	0.0036168	COL6A2
1027	-0.00361616	0.00361616	C8orf46
1028	-0.00361524	0.00361524	NELL1
1029	0.00361112	0.00361112	MYL10
1030	-0.00360996	0.00360996	CERCAM
1031	-0.0036081	0.0036081	SLC26A10
1032	-0.00360751	0.00360751	ULK2
1033	-0.00360657	0.00360657	INPP1
1034	0.00360555	0.00360555	SEC23IP
1035	-0.00360307	0.00360307	RPS6KA1
1036	-0.00360261	0.00360261	SHCBP1
1037	-0.00359993	0.00359993	ASUN
1038	-0.00359541	0.00359541	DNAJC13
1039	0.00359535	0.00359535	ATG12
1040	0.00359098	0.00359098	OR4S1
1041	-0.00359027	0.00359027	S100A7A
1042	-0.00359015	0.00359015	CCS
1043	-0.00358911	0.00358911	THYN1
1044	-0.00358861	0.00358861	ZNF570
1045	0.0035883	0.0035883	CAPN2
1046	0.0035857	0.0035857	OR2Z1
1047	0.00358496	0.00358496	EFTUD2
1048	0.00358169	0.00358169	TBL1X
1049	0.00358099	0.00358099	VPS16
1050	-0.00358046	0.00358046	TRIM69
1051	0.00358046	0.00358046	CAMKK2
1052	0.00357876	0.00357876	SLITRK3
1053	-0.00357728	0.00357728	TMEM167A
1054	-0.00357687	0.00357687	SDHC
1055	0.00357655	0.00357655	NSA2
1056	0.00357564	0.00357564	MFN2
1057	0.00357505	0.00357505	SKIV2L2
1058	0.0035743	0.0035743	VSX1
1059	-0.00357201	0.00357201	GPR26
1060	0.00357187	0.00357187	CKAP2L
1061	0.00357164	0.00357164	BTBD2
1062	-0.00357143	0.00357143	POGZ
1063	0.00357046	0.00357046	NAPEPLD
1064	0.00356863	0.00356863	UROD
1065	0.00356839	0.00356839	ROCK2
1066	0.00356651	0.00356651	MPRIP
1067	-0.00356562	0.00356562	PAIP2B
1068	0.00356525	0.00356525	FOXRED2
1069	0.0035637	0.0035637	ANKRD26
1070	0.00356259	0.00356259	KCND2
1071	-0.00356113	0.00356113	CCDC125
1072	-0.003561	0.003561	SYTL2
1073	-0.0035608	0.0035608	NLRC4
1074	0.00356054	0.00356054	OR1C1
1075	-0.00355887	0.00355887	OR10A6
1076	-0.00355861	0.00355861	NSUN6
1077	0.00355768	0.00355768	MRC2
1078	-0.00355604	0.00355604	FOXD4L4
1079	0.00355446	0.00355446	TPGS2
1080	-0.00355396	0.00355396	RAD9A
1081	0.00355326	0.00355326	EPB41L3
1082	-0.00355312	0.00355312	SLC23A3
1083	0.00355298	0.00355298	SLC35A3
1084	0.00355164	0.00355164	KCNK5
1085	-0.00354914	0.00354914	FAM131A
1086	0.00354866	0.00354866	MED25
1087	-0.00354836	0.00354836	AMY2B
1088	-0.00354558	0.00354558	LIG4
1089	0.00354259	0.00354259	PTRHD1
1090	0.00353654	0.00353654	ADIPOR2
1091	0.00353585	0.00353585	NDE1
1092	0.00353581	0.00353581	AKT1S1
1093	0.00353466	0.00353466	MAGEA4
1094	-0.00353116	0.00353116	UGP2
1095	0.0035278	0.0035278	WASH1
1096	0.00352611	0.00352611	CXXC4
1097	0.00352557	0.00352557	USE1
1098	0.00352458	0.00352458	GFPT2
1099	-0.00352381	0.00352381	RPS28
1100	-0.0035226	0.0035226	VPS41
1101	-0.00352043	0.00352043	SGSM2
1102	0.00352019	0.00352019	FAM171A1
1103	0.00352007	0.00352007	MMP11
1104	0.00351954	0.00351954	KLK2
1105	-0.00351826	0.00351826	IRX3
1106	-0.00351496	0.00351496	ACKR4
1107	0.00351459	0.00351459	LHX6
1108	0.00351456	0.00351456	TMSB4Y
1109	-0.00351439	0.00351439	SCG2
1110	-0.0035118	0.0035118	EXOSC6
1111	0.00351158	0.00351158	DCST1
1112	0.00351063	0.00351063	SPHK2
1113	0.00350945	0.00350945	RCVRN
1114	0.00350922	0.00350922	ADAR
1115	-0.00350901	0.00350901	PON3
1116	0.00350745	0.00350745	MYH7
1117	-0.00350578	0.00350578	FCGR3A
1118	-0.00350575	0.00350575	ARL6IP1
1119	-0.0035013	0.0035013	MORN4
1120	0.00350118	0.00350118	SELE
1121	0.00350079	0.00350079	TMEM208
1122	0.00349933	0.00349933	CCP110
1123	-0.00349855	0.00349855	ZDHHC2
1124	-0.00349707	0.00349707	RNF39
1125	0.00349634	0.00349634	SPSB1
1126	-0.0034962	0.0034962	ZNF202
1127	-0.00349305	0.00349305	FAM133A
1128	-0.0034928	0.0034928	C12orf74
1129	-0.0034911	0.0034911	NKAIN2
1130	0.00349106	0.00349106	YEATS2
1131	0.00349048	0.00349048	RIOK1
1132	0.00348977	0.00348977	SBDS
1133	0.00348949	0.00348949	FZD3
1134	0.00348878	0.00348878	ADNP
1135	-0.00348852	0.00348852	TRIM2
1136	-0.00348812	0.00348812	MYH13
1137	-0.0034876	0.0034876	ZCRB1
1138	0.00348751	0.00348751	WFS1
1139	0.00348721	0.00348721	RABGGTA
1140	-0.00348318	0.00348318	LRRC34
1141	0.00348245	0.00348245	MDH1
1142	0.00348097	0.00348097	PBXIP1
1143	-0.0034808	0.0034808	CCDC63
1144	-0.00347617	0.00347617	SLC14A2
1145	-0.0034748	0.0034748	NXPH3
1146	-0.00347388	0.00347388	VARS2
1147	-0.00347264	0.00347264	RHBDL3
1148	0.00347054	0.00347054	MEGF6
1149	-0.00347026	0.00347026	FGB
1150	-0.0034692	0.0034692	ATP5F1
1151	-0.00346805	0.00346805	SYDE1
1152	-0.00346649	0.00346649	BBOX1
1153	-0.00346519	0.00346519	DSC3
1154	-0.0034628	0.0034628	FIBIN
1155	-0.00346257	0.00346257	TMEM225
1156	0.00345957	0.00345957	FAM110B
1157	0.00345953	0.00345953	PPP5C
1158	0.00345793	0.00345793	ZNF521
1159	0.00345771	0.00345771	SLC25A36
1160	-0.00345765	0.00345765	SPA17
1161	0.00345656	0.00345656	KDM5D
1162	-0.00345614	0.00345614	RBBP9
1163	0.00345565	0.00345565	CCDC92
1164	-0.00345533	0.00345533	MBTPS2
1165	-0.00345438	0.00345438	SDHA
1166	0.00345434	0.00345434	FAM200A
1167	-0.00345316	0.00345316	S100A8
1168	-0.0034481	0.0034481	FABP3
1169	-0.00344522	0.00344522	MFSD10
1170	0.00344436	0.00344436	GK2
1171	-0.00344385	0.00344385	NUTM2F
1172	0.00344242	0.00344242	FRMPD1
1173	0.00344129	0.00344129	DDX1
1174	0.00343989	0.00343989	PAFAH2
1175	-0.00343852	0.00343852	CYP20A1
1176	-0.00343849	0.00343849	ALDH5A1
1177	-0.00343762	0.00343762	C1QC
1178	0.00343743	0.00343743	MYBPC1
1179	0.00343737	0.00343737	TRIM8
1180	0.00343706	0.00343706	ZNF507
1181	-0.00343678	0.00343678	MYNN
1182	0.00343654	0.00343654	C9orf43
1183	-0.00343638	0.00343638	STK36
1184	0.00343383	0.00343383	PPA1
1185	-0.00343081	0.00343081	RAB39A
1186	-0.00342942	0.00342942	CALM2
1187	0.00342939	0.00342939	SLC22A24
1188	-0.00342745	0.00342745	TICRR
1189	0.00342522	0.00342522	ZNF555
1190	-0.00342507	0.00342507	LMOD1
1191	-0.00342501	0.00342501	PURG
1192	-0.00342495	0.00342495	MIR99AHG
1193	-0.00342461	0.00342461	FLNA
1194	-0.00342249	0.00342249	CAP1
1195	0.00342169	0.00342169	TTF2
1196	-0.0034211	0.0034211	GLUD2
1197	-0.00341907	0.00341907	MARCKSL1
1198	0.00341882	0.00341882	FBN1
1199	0.00341829	0.00341829	MAP4K2
1200	0.0034182	0.0034182	ZW10
1201	0.0034173	0.0034173	CABS1
1202	0.00341643	0.00341643	FAM92A1
1203	0.00341599	0.00341599	CACNB4
1204	0.00341575	0.00341575	FHL1
1205	-0.00341346	0.00341346	ZNF568
1206	0.0034132	0.0034132	CRISP2
1207	-0.00341026	0.00341026	PAK6
1208	0.00341014	0.00341014	NET1
1209	0.00340838	0.00340838	GABBR1
1210	0.00340802	0.00340802	POM121
1211	0.00340663	0.00340663	CMA1
1212	-0.00340414	0.00340414	CCDC191
1213	0.00340399	0.00340399	MED31
1214	0.00340394	0.00340394	PLCE1
1215	-0.00340335	0.00340335	THUMPD3
1216	0.00340062	0.00340062	HIST1H2AB
1217	0.00339883	0.00339883	C8orf33
1218	0.0033988	0.0033988	DGKG
1219	-0.00339876	0.00339876	NXF2
1220	-0.00339788	0.00339788	RANBP3L
1221	-0.00339675	0.00339675	AUTS2
1222	0.00339632	0.00339632	CCDC28B
1223	-0.0033942	0.0033942	MRPS18A
1224	-0.00339414	0.00339414	ETFDH
1225	-0.00339287	0.00339287	OR6C76
1226	0.00339158	0.00339158	OR4D1
1227	-0.00339067	0.00339067	SH2D5
1228	-0.00339027	0.00339027	TBXA2R
1229	0.00339023	0.00339023	RPS6KA2
1230	-0.00338883	0.00338883	TMEM222
1231	-0.00338836	0.00338836	STIM2
1232	0.00338836	0.00338836	CAPS2
1233	-0.00338768	0.00338768	LRRC73
1234	0.00338542	0.00338542	ASXL3
1235	0.00338536	0.00338536	E2F2
1236	0.00338456	0.00338456	NKAP
1237	0.00338408	0.00338408	AP1G1
1238	0.00338308	0.00338308	FGFBP1
1239	-0.00338295	0.00338295	HOXD4
1240	0.00338234	0.00338234	RP1L1
1241	-0.00338202	0.00338202	PPIL6
1242	0.00338195	0.00338195	ABHD6
1243	0.00338164	0.00338164	PI4KAP2
1244	-0.0033816	0.0033816	NCAPD3
1245	-0.00337861	0.00337861	SPEG
1246	-0.00337819	0.00337819	ZNF292
1247	0.0033774	0.0033774	PSMA1
1248	0.00337725	0.00337725	KLHL20
1249	0.00337715	0.00337715	PAQR5
1250	-0.0033752	0.0033752	H6PD
1251	-0.0033751	0.0033751	SCML1
1252	-0.00337498	0.00337498	MDN1
1253	-0.00337483	0.00337483	TNFRSF13C
1254	0.00337355	0.00337355	APLN
1255	0.00337321	0.00337321	RPP21
1256	0.00337273	0.00337273	DUX1
1257	-0.00337146	0.00337146	IGFBP5
1258	0.00337006	0.00337006	B3GALNT1
1259	0.00336922	0.00336922	LDOC1
1260	-0.00336897	0.00336897	ORC6
1261	0.00336629	0.00336629	DEPTOR
1262	-0.00336576	0.00336576	SQSTM1
1263	0.00336427	0.00336427	NUDT13
1264	0.00336358	0.00336358	CALB2
1265	0.0033635	0.0033635	ASB9
1266	0.0033631	0.0033631	MMP7
1267	-0.00336182	0.00336182	IFNE
1268	0.00336156	0.00336156	SIGLEC5
1269	0.00336073	0.00336073	RNF165
1270	-0.00335954	0.00335954	GPX3
1271	0.00335933	0.00335933	DGCR2
1272	0.00335843	0.00335843	SLC35B3
1273	0.003358	0.003358	RHOG
1274	-0.00335626	0.00335626	PGPEP1
1275	-0.00335481	0.00335481	PPARG
1276	-0.00335465	0.00335465	TIMP2
1277	-0.00335453	0.00335453	STK19
1278	0.00335299	0.00335299	ZKSCAN4
1279	0.0033528	0.0033528	MAP3K5
1280	0.00335272	0.00335272	PF4V1
1281	-0.00335234	0.00335234	RAB3B
1282	-0.00334944	0.00334944	MAP3K12
1283	0.00334887	0.00334887	NICN1
1284	0.00334862	0.00334862	BLVRA
1285	-0.00334853	0.00334853	RSBN1L
1286	0.00334767	0.00334767	MRPL44
1287	0.00334661	0.00334661	SLC26A4
1288	0.00334631	0.00334631	NANP
1289	-0.00334624	0.00334624	LMAN2L
1290	-0.00334609	0.00334609	STARD5
1291	-0.0033448	0.0033448	SCGB1A1
1292	0.00334424	0.00334424	AHCYL2
1293	0.00334358	0.00334358	TAS2R42
1294	0.00334356	0.00334356	PPP1R13B
1295	-0.00334332	0.00334332	ADD1
1296	0.0033426	0.0033426	AKIRIN1
1297	-0.00334056	0.00334056	GPR32
1298	0.00334002	0.00334002	AKR1C2
1299	-0.00333928	0.00333928	CDK2
1300	-0.00333903	0.00333903	SNX19
1301	-0.00333773	0.00333773	EHBP1L1
1302	-0.00333718	0.00333718	LOR
1303	-0.00333696	0.00333696	NRBP2
1304	-0.00333604	0.00333604	PDHA2
1305	0.00333338	0.00333338	HAO2
1306	-0.00333248	0.00333248	MPC1
1307	-0.00333157	0.00333157	NAT10
1308	-0.00332841	0.00332841	PHF21B
1309	0.00332814	0.00332814	FYCO1
1310	0.00332807	0.00332807	FAM175A
1311	0.00332739	0.00332739	MFSD6
1312	-0.0033241	0.0033241	TRUB1
1313	0.00332251	0.00332251	UBA1
1314	-0.00332189	0.00332189	LAYN
1315	0.00332133	0.00332133	NUBP1
1316	-0.00332081	0.00332081	CXCR2
1317	-0.00332021	0.00332021	BEND3
1318	-0.00331981	0.00331981	MRS2
1319	0.00331906	0.00331906	PSG4
1320	0.00331878	0.00331878	SETD1B
1321	0.00331803	0.00331803	NELFCD
1322	-0.00331782	0.00331782	TMEM130
1323	-0.00331701	0.00331701	IL26
1324	-0.0033145	0.0033145	B4GALT7
1325	0.0033139	0.0033139	RNF208
1326	0.00331371	0.00331371	NEK5
1327	-0.0033134	0.0033134	HAVCR1
1328	0.00331314	0.00331314	SOCS5
1329	0.00331276	0.00331276	PSMA6
1330	0.00331266	0.00331266	ZNF444
1331	0.00331147	0.00331147	CACNA1C
1332	-0.00331145	0.00331145	PTCD1
1333	-0.00331125	0.00331125	MCPH1
1334	0.00331123	0.00331123	ITPK1
1335	-0.00331056	0.00331056	AK9
1336	0.00331034	0.00331034	SMARCA4
1337	0.00330896	0.00330896	WDR33
1338	-0.00330883	0.00330883	AKR1C4
1339	-0.00330879	0.00330879	CTSZ
1340	-0.00330857	0.00330857	MEA1
1341	0.00330782	0.00330782	CD55
1342	-0.00330671	0.00330671	FAM160B2
1343	0.0033065	0.0033065	ZC3H12A
1344	0.00330608	0.00330608	SCGB1D1
1345	0.00330586	0.00330586	E2F5
1346	-0.00330571	0.00330571	SHCBP1L
1347	0.00330556	0.00330556	ANK3
1348	-0.00330488	0.00330488	GDNF
1349	0.00330486	0.00330486	TGFBI
1350	-0.00330363	0.00330363	HPCAL1
1351	-0.00330224	0.00330224	PPP2R3B
1352	0.00330165	0.00330165	JARID2
1353	-0.00330154	0.00330154	PKDCC
1354	-0.00329969	0.00329969	ATP6V1H
1355	-0.00329959	0.00329959	DHH
1356	-0.00329927	0.00329927	SLC35B1
1357	-0.00329719	0.00329719	GLB1L2
1358	0.00329635	0.00329635	ZNF331
1359	0.00329574	0.00329574	TMEM184C
1360	-0.00329536	0.00329536	MRPS35
1361	0.00329492	0.00329492	KRT33A
1362	-0.00329403	0.00329403	COMMD9
1363	-0.00329279	0.00329279	SOCS3
1364	-0.00329155	0.00329155	OR1E1
1365	-0.00329123	0.00329123	SLC25A29
1366	-0.00329114	0.00329114	HSF4
1367	0.0032903	0.0032903	SNX2
1368	0.00329	0.00329	GLTP
1369	-0.00328958	0.00328958	MRGPRE
1370	0.00328948	0.00328948	NOD2
1371	-0.00328852	0.00328852	SEMA6C
1372	-0.00328806	0.00328806	ALDH3A1
1373	-0.00328742	0.00328742	ADAM9
1374	-0.00328741	0.00328741	SLC9A1
1375	-0.0032874	0.0032874	A1BG
1376	0.00328548	0.00328548	SLC44A1
1377	0.00328536	0.00328536	PRELID3A
1378	0.00328496	0.00328496	RAN
1379	-0.00328496	0.00328496	HEYL
1380	0.00328484	0.00328484	COG7
1381	0.0032845	0.0032845	GRIK4
1382	-0.00328181	0.00328181	DTNA
1383	-0.00328179	0.00328179	ADAMTSL4
1384	0.00328116	0.00328116	TSPAN8
1385	-0.00328078	0.00328078	TESC
1386	0.00328032	0.00328032	TRIP6
1387	0.0032799	0.0032799	PPP1R9A
1388	-0.00327978	0.00327978	DGCR6L
1389	0.00327948	0.00327948	ATG101
1390	0.00327922	0.00327922	SLC12A7
1391	0.00327816	0.00327816	XRRA1
1392	-0.00327805	0.00327805	SCOC
1393	-0.00327623	0.00327623	IL5
1394	0.00327594	0.00327594	SHOX2
1395	-0.00327484	0.00327484	HYDIN
1396	0.00327474	0.00327474	PAPSS1
1397	-0.00327452	0.00327452	POMZP3
1398	-0.00327401	0.00327401	SYNCRIP
1399	-0.00327398	0.00327398	ODF1
1400	0.00327322	0.00327322	GCG
1401	-0.00327232	0.00327232	PRRC1
1402	0.00327151	0.00327151	ENTPD2
1403	0.00327084	0.00327084	RPL27A
1404	0.00327022	0.00327022	KLF2
1405	0.0032698	0.0032698	ITGA2B
1406	0.00326974	0.00326974	OR4D5
1407	-0.0032695	0.0032695	FAM64A
1408	0.0032674	0.0032674	ABHD16A
1409	0.00326675	0.00326675	RBBP7
1410	-0.00326484	0.00326484	C1D
1411	-0.00326465	0.00326465	TCHH
1412	0.00326434	0.00326434	SLC22A8
1413	-0.0032637	0.0032637	RB1CC1
1414	-0.00326287	0.00326287	STYX
1415	0.00326265	0.00326265	TEFM
1416	0.00326212	0.00326212	LYG2
1417	0.00326138	0.00326138	SHMT1
1418	-0.00326086	0.00326086	PIGX
1419	-0.00325583	0.00325583	STX1B
1420	0.00325513	0.00325513	POLR3F
1421	-0.00325492	0.00325492	NRN1L
1422	0.00325344	0.00325344	ACOT2
1423	-0.00325275	0.00325275	GXYLT1
1424	-0.00325201	0.00325201	HTR2A
1425	0.00325123	0.00325123	F8A1
1426	-0.00325066	0.00325066	OLA1
1427	0.00325057	0.00325057	TAF4
1428	-0.00325052	0.00325052	CSRNP2
1429	0.00325052	0.00325052	ITM2B
1430	0.00325037	0.00325037	OR8D4
1431	-0.00325022	0.00325022	SUMO2
1432	-0.00325006	0.00325006	GPR135
1433	-0.00324959	0.00324959	POLD4
1434	-0.0032486	0.0032486	TAS2R9
1435	0.00324809	0.00324809	LTF
1436	-0.00324806	0.00324806	BNIP1
1437	-0.0032464	0.0032464	CYP4F12
1438	0.00324624	0.00324624	CLEC3A
1439	-0.00324561	0.00324561	ARL5B
1440	0.00324502	0.00324502	RNF40
1441	-0.00324415	0.00324415	CHST14
1442	0.00324103	0.00324103	TEKT3
1443	0.00324101	0.00324101	GPR142
1444	-0.00323961	0.00323961	MDH2
1445	0.0032383	0.0032383	HYI
1446	0.00323725	0.00323725	NOP9
1447	0.00323685	0.00323685	SH2D3C
1448	-0.00323607	0.00323607	C1orf100
1449	0.00323581	0.00323581	FKBP11
1450	0.00323497	0.00323497	MRPS6
1451	0.00323381	0.00323381	POLR2L
1452	0.00323284	0.00323284	BRPF1
1453	-0.00323217	0.00323217	MED18
1454	0.00323207	0.00323207	CSF3
1455	0.00323124	0.00323124	SLC44A4
1456	0.00323021	0.00323021	NOV
1457	0.00323003	0.00323003	SHKBP1
1458	0.00322906	0.00322906	ZSCAN18
1459	0.003229	0.003229	SPG21
1460	0.00322881	0.00322881	LIG1
1461	-0.00322747	0.00322747	SNU13
1462	-0.00322663	0.00322663	PLEKHH2
1463	-0.00322515	0.00322515	R3HCC1
1464	-0.00322375	0.00322375	SAA2
1465	0.00322331	0.00322331	PHC2
1466	0.00322329	0.00322329	ZNF581
1467	0.00322214	0.00322214	IPO9
1468	0.00322195	0.00322195	PLEKHO2
1469	0.00322108	0.00322108	MLC1
1470	0.00322102	0.00322102	FNDC8
1471	-0.0032202	0.0032202	CAV1
1472	0.00322019	0.00322019	PLEKHM1
1473	0.00321954	0.00321954	STAMBPL1
1474	-0.00321913	0.00321913	USP15
1475	-0.00321902	0.00321902	FMNL2
1476	-0.00321897	0.00321897	PHYHIP
1477	-0.00321782	0.00321782	REEP1
1478	0.00321776	0.00321776	RASL10B
1479	-0.00321565	0.00321565	TRIM13
1480	0.00321556	0.00321556	KHSRP
1481	-0.00321506	0.00321506	FAM134B
1482	-0.00321456	0.00321456	FAM50A
1483	-0.00321381	0.00321381	MOB4
1484	0.00321231	0.00321231	CYYR1
1485	-0.00321223	0.00321223	U2SURP
1486	-0.00321177	0.00321177	SOAT1
1487	-0.00321147	0.00321147	NIPA1
1488	-0.0032112	0.0032112	ZNRF4
1489	-0.00320996	0.00320996	BEX5
1490	-0.00320994	0.00320994	CDH6
1491	-0.00320837	0.00320837	FOXA1
1492	0.00320752	0.00320752	KLHL3
1493	-0.00320708	0.00320708	HEPACAM2
1494	0.00320478	0.00320478	RGS6
1495	-0.00320448	0.00320448	PDGFRL
1496	0.00320333	0.00320333	FAM180B
1497	-0.00320263	0.00320263	CRBN
1498	-0.00320182	0.00320182	MRPL41
1499	0.00320175	0.00320175	CCNL1
1500	0.0031998	0.0031998	LILRA6
1501	-0.00319772	0.00319772	NPHS1
1502	-0.00319714	0.00319714	ST3GAL3
1503	-0.00319707	0.00319707	FIP1L1
1504	-0.00319389	0.00319389	TTTY5
1505	-0.00319296	0.00319296	PPP2R2B
1506	-0.00319211	0.00319211	CCDC113
1507	-0.00319207	0.00319207	OSTN
1508	0.00319198	0.00319198	ALPL
1509	-0.00319152	0.00319152	DDX56
1510	0.00319135	0.00319135	TMSB15B
1511	-0.00319111	0.00319111	TRIM9
1512	-0.00318926	0.00318926	LIMD2
1513	-0.00318918	0.00318918	FKBP7
1514	0.00318872	0.00318872	HSPA14
1515	-0.00318826	0.00318826	RBM28
1516	-0.00318823	0.00318823	KCNAB3
1517	0.00318768	0.00318768	RRP9
1518	0.00318665	0.00318665	ALDH3A2
1519	-0.00318536	0.00318536	RNF149
1520	0.0031852	0.0031852	SH3D19
1521	-0.00318413	0.00318413	ANKRD1
1522	-0.00318402	0.00318402	TSGA13
1523	0.00318363	0.00318363	NTM
1524	-0.00318253	0.00318253	SLC4A1AP
1525	0.00318226	0.00318226	ERMP1
1526	0.00318062	0.00318062	ZNF273
1527	0.00318013	0.00318013	ITGB5
1528	0.00317988	0.00317988	PEG10
1529	-0.00317941	0.00317941	XCL2
1530	-0.00317833	0.00317833	ADAD2
1531	0.00317693	0.00317693	GRPEL2
1532	0.00317545	0.00317545	SLC35E2B
1533	0.00317365	0.00317365	TAF6L
1534	-0.00317329	0.00317329	JCHAIN
1535	-0.00317317	0.00317317	TDP2
1536	-0.00317287	0.00317287	PRKRIP1
1537	-0.00317203	0.00317203	CYP2C19
1538	0.00317176	0.00317176	GAS7
1539	-0.00317173	0.00317173	IMPDH2
1540	-0.00317133	0.00317133	MAN2B2
1541	0.00317126	0.00317126	WFDC13
1542	-0.00317095	0.00317095	APEH
1543	-0.00317095	0.00317095	RCBTB1
1544	-0.0031695	0.0031695	CLNS1A
1545	0.00316887	0.00316887	NOL12
1546	0.00316863	0.00316863	ELOVL4
1547	0.003168	0.003168	B4GALNT4
1548	-0.003168	0.003168	PPP1R2
1549	0.00316677	0.00316677	NUFIP2
1550	-0.00316511	0.00316511	KCNIP1
1551	0.00316508	0.00316508	GLRB
1552	-0.00316497	0.00316497	NUB1
1553	-0.00316423	0.00316423	VDAC2
1554	0.00316403	0.00316403	HEXDC
1555	0.00316318	0.00316318	MAML1
1556	0.00316303	0.00316303	CAPN9
1557	-0.003163	0.003163	ZDHHC21
1558	-0.00316252	0.00316252	DRAM2
1559	0.00316075	0.00316075	B3GLCT
1560	0.00316062	0.00316062	ARMC8
1561	0.00316033	0.00316033	ATP5J2
1562	-0.00316026	0.00316026	TMCO1
1563	0.00315848	0.00315848	SEMA6D
1564	-0.00315814	0.00315814	MED7
1565	0.00315781	0.00315781	COA7
1566	0.00315771	0.00315771	SGCZ
1567	0.00315679	0.00315679	SOX10
1568	-0.00315396	0.00315396	HSPG2
1569	-0.00315381	0.00315381	MRPS36
1570	0.00315365	0.00315365	PDCD4
1571	-0.00315318	0.00315318	TRIM37
1572	-0.00315241	0.00315241	TRMU
1573	-0.00315201	0.00315201	ARPP21
1574	-0.00315191	0.00315191	ADCY5
1575	-0.00315167	0.00315167	TM7SF3
1576	-0.00315118	0.00315118	DDIT3
1577	0.00315113	0.00315113	BOLA1
1578	-0.00315109	0.00315109	SDR39U1
1579	0.00314993	0.00314993	CRYBA1
1580	-0.00314979	0.00314979	HOGA1
1581	0.00314895	0.00314895	FAM171A2
1582	0.00314874	0.00314874	ZNF16
1583	0.00314859	0.00314859	UBE2L6
1584	-0.00314838	0.00314838	RS1
1585	0.00314822	0.00314822	CD86
1586	-0.00314806	0.00314806	KRT33B
1587	0.00314626	0.00314626	ZNF791
1588	-0.00314587	0.00314587	TEX28
1589	0.00314575	0.00314575	NEU3
1590	-0.00314567	0.00314567	MITD1
1591	0.00314539	0.00314539	POLK
1592	-0.0031449	0.0031449	CTDP1
1593	0.00314424	0.00314424	SMARCC1
1594	0.00314188	0.00314188	RGS1
1595	-0.00314188	0.00314188	POMC
1596	0.00314181	0.00314181	MEX3A
1597	-0.00314147	0.00314147	CAPS
1598	0.00314114	0.00314114	SLC16A14
1599	-0.00313879	0.00313879	TNFRSF10B
1600	-0.00313873	0.00313873	FAM184A
1601	-0.00313832	0.00313832	GPATCH3
1602	0.00313831	0.00313831	TECPR1
1603	0.00313764	0.00313764	ARL6IP6
1604	-0.00313712	0.00313712	PEX14
1605	0.00313695	0.00313695	STX8
1606	0.00313692	0.00313692	ROBO4
1607	0.00313682	0.00313682	DYRK1A
1608	0.00313672	0.00313672	PRPS2
1609	-0.00313666	0.00313666	CASP6
1610	-0.00313633	0.00313633	ACAD11
1611	-0.00313594	0.00313594	CPSF3
1612	0.00313544	0.00313544	CPQ
1613	-0.00313531	0.00313531	METTL16
1614	-0.0031348	0.0031348	DLAT
1615	-0.0031346	0.0031346	MMACHC
1616	-0.00313446	0.00313446	CDK2AP2
1617	-0.00313377	0.00313377	TSR2
1618	0.00313324	0.00313324	TPM3
1619	0.00313284	0.00313284	ARHGEF5
1620	0.00313246	0.00313246	SCUBE1
1621	0.00313211	0.00313211	ARRB2
1622	0.00313208	0.00313208	OGDHL
1623	-0.00313116	0.00313116	WNT6
1624	0.00313102	0.00313102	PIEZO2
1625	0.00313088	0.00313088	CCL1
1626	-0.00313077	0.00313077	SREK1
1627	0.00313055	0.00313055	PGRMC2
1628	0.00313046	0.00313046	LEF1
1629	0.00313001	0.00313001	KPNA4
1630	0.00312717	0.00312717	PGGHG
1631	0.00312544	0.00312544	GTF2F1
1632	-0.00312455	0.00312455	SLC25A39
1633	-0.0031244	0.0031244	CD59
1634	0.00312343	0.00312343	SUCO
1635	-0.00312324	0.00312324	SLC2A9
1636	-0.00312277	0.00312277	PLEKHA7
1637	-0.00312245	0.00312245	HMGN2
1638	-0.00312222	0.00312222	CAMK1G
1639	0.00312218	0.00312218	PPP2R5E
1640	0.00312162	0.00312162	SGK1
1641	-0.0031209	0.0031209	CSF1
1642	-0.00312081	0.00312081	WSB1
1643	0.00311861	0.00311861	NFKBID
1644	0.00311859	0.00311859	PRPF40B
1645	0.00311826	0.00311826	GBP1
1646	-0.00311817	0.00311817	MLLT3
1647	0.00311796	0.00311796	ICA1L
1648	-0.00311783	0.00311783	LIN9
1649	0.00311778	0.00311778	CCRL2
1650	-0.00311743	0.00311743	PDE6A
1651	-0.00311604	0.00311604	NMUR2
1652	-0.00311577	0.00311577	UGT2B28
1653	-0.00311558	0.00311558	SOWAHA
1654	-0.00311418	0.00311418	HIST1H2BA
1655	-0.00311382	0.00311382	VAMP4
1656	-0.00311307	0.00311307	TRDN
1657	-0.00311226	0.00311226	LOC400867
1658	-0.00311223	0.00311223	SLC35F3
1659	0.00311173	0.00311173	RAB41
1660	-0.0031116	0.0031116	MMD
1661	0.00311058	0.00311058	FBXW8
1662	-0.00311003	0.00311003	CHAF1A
1663	-0.00310779	0.00310779	L3MBTL4
1664	-0.00310779	0.00310779	RPS6KL1
1665	0.00310752	0.00310752	ZNF681
1666	0.00310751	0.00310751	SOX18
1667	0.00310664	0.00310664	AAMP
1668	0.00310581	0.00310581	ENSA
1669	-0.00310423	0.00310423	ANKRD27
1670	-0.00310377	0.00310377	ZNF8
1671	-0.00310375	0.00310375	TSPAN6
1672	-0.00310346	0.00310346	CYBRD1
1673	0.00310296	0.00310296	NR4A1
1674	0.00310234	0.00310234	ARIH1
1675	-0.00310191	0.00310191	TEX37
1676	0.0031018	0.0031018	RPTOR
1677	-0.00310176	0.00310176	RNLS
1678	-0.00310168	0.00310168	CNEP1R1
1679	-0.00310028	0.00310028	AKR7A2
1680	0.00309936	0.00309936	RAD50
1681	-0.00309932	0.00309932	RPS18
1682	-0.00309852	0.00309852	MPP2
1683	-0.00309786	0.00309786	KCNA5
1684	-0.00309782	0.00309782	ADAT2
1685	-0.00309741	0.00309741	ZNF23
1686	0.00309738	0.00309738	PRKACA
1687	0.00309686	0.00309686	PRDX5
1688	-0.00309607	0.00309607	HPS6
1689	0.00309528	0.00309528	PPARGC1A
1690	0.00309509	0.00309509	PLVAP
1691	-0.00309489	0.00309489	IRF9
1692	0.00309451	0.00309451	KDF1
1693	0.00309445	0.00309445	DIRAS3
1694	0.00309437	0.00309437	RAPGEFL1
1695	0.00309306	0.00309306	DKK1
1696	0.00309268	0.00309268	TAT
1697	0.00309233	0.00309233	ADORA1
1698	-0.00309142	0.00309142	ZNF563
1699	0.00309111	0.00309111	ZNF547
1700	0.00309106	0.00309106	ANKRD20A1
1701	-0.00309097	0.00309097	SLC39A3
1702	-0.00308925	0.00308925	PUDP
1703	-0.00308812	0.00308812	ADAM19
1704	-0.00308805	0.00308805	EMD
1705	0.00308788	0.00308788	SCG5
1706	0.00308746	0.00308746	MAGEB10
1707	0.00308739	0.00308739	PRKAA2
1708	-0.00308675	0.00308675	RRS1
1709	-0.00308594	0.00308594	CDH20
1710	0.00308587	0.00308587	GNPAT
1711	0.00308496	0.00308496	CRLF3
1712	0.00308424	0.00308424	CXorf36
1713	0.0030842	0.0030842	TEX14
1714	0.00308323	0.00308323	TNS3
1715	-0.00308172	0.00308172	PIGP
1716	0.00308115	0.00308115	PLCL2
1717	-0.00308103	0.00308103	RUFY3
1718	0.00308068	0.00308068	ZMYM1
1719	0.00308047	0.00308047	BBX
1720	0.0030794	0.0030794	RAB27B
1721	0.0030791	0.0030791	CBLN1
1722	-0.00307838	0.00307838	SLC25A51
1723	-0.00307827	0.00307827	CSNK1G1
1724	-0.00307817	0.00307817	UQCRB
1725	0.00307793	0.00307793	MRGPRX2
1726	-0.00307785	0.00307785	RGCC
1727	-0.00307734	0.00307734	DUSP6
1728	-0.00307731	0.00307731	BDNF
1729	-0.00307715	0.00307715	JMJD8
1730	0.00307668	0.00307668	NLGN4X
1731	0.00307659	0.00307659	ZNF256
1732	0.00307619	0.00307619	ENPP6
1733	0.00307586	0.00307586	NSUN7
1734	-0.0030754	0.0030754	GLRA1
1735	-0.00307525	0.00307525	HINT3
1736	0.00307486	0.00307486	DDOST
1737	-0.00307479	0.00307479	PCK1
1738	0.00307429	0.00307429	GANC
1739	0.00307414	0.00307414	C1orf116
1740	0.00307298	0.00307298	CMTR1
1741	-0.00307262	0.00307262	SLC19A2
1742	-0.00307232	0.00307232	CA2
1743	-0.00307195	0.00307195	CAGE1
1744	0.00307175	0.00307175	YKT6
1745	0.0030713	0.0030713	PELI1
1746	-0.00307076	0.00307076	ERO1A
1747	-0.0030705	0.0030705	KCNQ1
1748	0.00307022	0.00307022	DUSP1
1749	-0.00306989	0.00306989	MLEC
1750	0.00306889	0.00306889	SOX13
1751	0.003067	0.003067	LRRC40
1752	0.00306693	0.00306693	CEP72
1753	-0.0030667	0.0030667	SYNPR
1754	0.00306663	0.00306663	BAGE3
1755	-0.00306535	0.00306535	MGC70870
1756	0.00306486	0.00306486	MTF1
1757	-0.00306469	0.00306469	FOLR3
1758	-0.00306272	0.00306272	RAD51AP1
1759	-0.00306239	0.00306239	MRPS5
1760	0.0030616	0.0030616	CADM3
1761	0.00306117	0.00306117	CLDN15
1762	0.00306105	0.00306105	ALAS1
1763	-0.00306071	0.00306071	ACSL5
1764	0.00306042	0.00306042	TBL2
1765	0.00306019	0.00306019	CCDC94
1766	-0.00305865	0.00305865	CSNK2A1
1767	0.00305841	0.00305841	MAPRE1
1768	-0.00305826	0.00305826	GRHL3
1769	0.00305785	0.00305785	DMRTC1
1770	0.00305671	0.00305671	NPFFR2
1771	0.00305609	0.00305609	IKBKE
1772	-0.003056	0.003056	RMDN2
1773	0.00305598	0.00305598	PNKP
1774	0.00305576	0.00305576	GPR31
1775	-0.00305549	0.00305549	HELLS
1776	-0.00305328	0.00305328	C20orf85
1777	-0.00305326	0.00305326	CKS2
1778	-0.00305285	0.00305285	ZDHHC15
1779	0.00305271	0.00305271	NDUFB10
1780	-0.0030524	0.0030524	COBLL1
1781	-0.00305215	0.00305215	P2RY1
1782	-0.00305214	0.00305214	KCNJ4
1783	-0.00305119	0.00305119	UEVLD
1784	-0.00305028	0.00305028	GRIN2A
1785	-0.00304955	0.00304955	TCF7L1
1786	0.00304955	0.00304955	FLRT3
1787	0.00304879	0.00304879	RASA3
1788	-0.00304832	0.00304832	PLEKHG5
1789	0.00304826	0.00304826	SCRN1
1790	0.00304824	0.00304824	EPHB3
1791	0.00304721	0.00304721	LRRN3
1792	-0.00304715	0.00304715	PDCD5
1793	0.00304683	0.00304683	SMARCC2
1794	-0.0030462	0.0030462	PPP1R3A
1795	-0.00304466	0.00304466	CLDND1
1796	-0.00304313	0.00304313	GNG4
1797	-0.00304212	0.00304212	DOPEY2
1798	-0.00304166	0.00304166	GLIPR2
1799	0.00304084	0.00304084	NR4A3
1800	-0.00304026	0.00304026	NOB1
1801	0.00303997	0.00303997	ALYREF
1802	0.00303937	0.00303937	GJA9
1803	-0.00303869	0.00303869	MRPL37
1804	-0.00303847	0.00303847	STX10
1805	0.00303847	0.00303847	NFKBIZ
1806	0.00303802	0.00303802	PHIP
1807	-0.00303779	0.00303779	SOCS4
1808	0.00303764	0.00303764	TBP
1809	-0.00303757	0.00303757	HIST1H2AC
1810	0.00303619	0.00303619	NFKB1
1811	-0.00303603	0.00303603	TMPRSS11D
1812	0.00303585	0.00303585	AXDND1
1813	0.00303506	0.00303506	MBTD1
1814	0.00303306	0.00303306	PRKRA
1815	0.0030324	0.0030324	BSN
1816	0.00303214	0.00303214	TBCE
1817	-0.00303175	0.00303175	OAT
1818	-0.00303172	0.00303172	IFT43
1819	0.00303125	0.00303125	DLD
1820	0.00303116	0.00303116	PHACTR1
1821	-0.00303109	0.00303109	SATB2
1822	0.00303013	0.00303013	POLR2J
1823	0.00303004	0.00303004	GLE1
1824	-0.00302983	0.00302983	SNRNP25
1825	-0.0030296	0.0030296	JAKMIP1
1826	0.00302936	0.00302936	PCBP4
1827	0.00302916	0.00302916	ZC3HAV1
1828	0.00302831	0.00302831	FBXO33
1829	0.003028	0.003028	CDS1
1830	-0.00302746	0.00302746	AMY2A
1831	0.00302746	0.00302746	HNRNPM
1832	0.0030273	0.0030273	TREML1
1833	-0.003027	0.003027	PIGF
1834	-0.00302596	0.00302596	MOB2
1835	0.00302571	0.00302571	GABARAP
1836	0.00302551	0.00302551	ELP2
1837	0.003025	0.003025	TTI2
1838	-0.00302393	0.00302393	ANO3
1839	-0.00302368	0.00302368	FAM49B
1840	0.00302318	0.00302318	ATG9B
1841	-0.0030219	0.0030219	ZBTB6
1842	0.00302187	0.00302187	SLC6A8
1843	-0.00302159	0.00302159	KIF6
1844	0.00302142	0.00302142	SIX5
1845	-0.00302111	0.00302111	PMM2
1846	-0.0030211	0.0030211	TTPA
1847	-0.003021	0.003021	COL6A5
1848	-0.00302077	0.00302077	TEX35
1849	0.00302033	0.00302033	TEX101
1850	0.00301973	0.00301973	NALCN
1851	0.00301896	0.00301896	PHF5A
1852	-0.00301871	0.00301871	ANOS1
1853	-0.00301834	0.00301834	STS
1854	0.00301815	0.00301815	SLC6A12
1855	-0.00301808	0.00301808	DHX35
1856	0.00301798	0.00301798	OR10G8
1857	0.00301764	0.00301764	MZF1
1858	0.00301736	0.00301736	SCD5
1859	0.00301683	0.00301683	CXCL8
1860	-0.00301658	0.00301658	GRHL1
1861	-0.0030162	0.0030162	NEUROG2
1862	-0.0030162	0.0030162	ST14
1863	-0.00301607	0.00301607	HS3ST3B1
1864	-0.00301604	0.00301604	GSDMD
1865	-0.00301573	0.00301573	ARHGAP24
1866	0.00301419	0.00301419	RSAD1
1867	-0.00301412	0.00301412	NRG4
1868	-0.00301347	0.00301347	PLPPR5
1869	0.00301312	0.00301312	NLRP4
1870	0.00301292	0.00301292	DCAF10
1871	-0.00301255	0.00301255	OR3A3
1872	0.00301229	0.00301229	COMMD1
1873	-0.0030112	0.0030112	WARS
1874	-0.00301051	0.00301051	PSRC1
1875	-0.00301007	0.00301007	NGEF
1876	-0.00300933	0.00300933	LY75
1877	-0.00300901	0.00300901	IFT20
1878	0.00300864	0.00300864	GUCY1A2
1879	0.00300774	0.00300774	ZNF77
1880	0.00300772	0.00300772	RSPRY1
1881	0.00300722	0.00300722	NEK8
1882	0.00300698	0.00300698	LYRM7
1883	-0.00300457	0.00300457	PRPF3
1884	-0.00300413	0.00300413	BEST3
1885	0.00300316	0.00300316	HIVEP3
1886	0.0030024	0.0030024	MUSK
1887	0.00300227	0.00300227	APCDD1L
1888	-0.00300175	0.00300175	PTPN12
1889	0.00300144	0.00300144	MFSD14A
1890	0.00299991	0.00299991	SAMD9
1891	-0.00299901	0.00299901	HSD11B1L
1892	0.00299775	0.00299775	PIP5K1A
1893	0.00299751	0.00299751	SNAP23
1894	-0.00299558	0.00299558	CREG1
1895	-0.00299554	0.00299554	ZNF44
1896	0.00299553	0.00299553	AMER3
1897	-0.00299516	0.00299516	PPP1R3B
1898	-0.0029951	0.0029951	PTCH2
1899	0.00299454	0.00299454	FBXO38
1900	-0.00299373	0.00299373	SYT16
1901	0.00299363	0.00299363	OR1D2
1902	0.00299346	0.00299346	HLA-DOB
1903	0.00299328	0.00299328	RBM26
1904	-0.00299301	0.00299301	HRASLS5
1905	0.00299255	0.00299255	PEF1
1906	-0.00299237	0.00299237	TMEM53
1907	-0.00299181	0.00299181	ESYT1
1908	0.00299157	0.00299157	RPS9
1909	0.00299083	0.00299083	RNF44
1910	0.00299058	0.00299058	IPMK
1911	0.0029905	0.0029905	MICU2
1912	0.00299032	0.00299032	RPL17
1913	-0.0029903	0.0029903	CEP104
1914	-0.00299003	0.00299003	LRRC6
1915	-0.00298988	0.00298988	GPKOW
1916	0.00298978	0.00298978	SSH1
1917	-0.00298868	0.00298868	OPA1
1918	-0.00298711	0.00298711	PCDHB6
1919	-0.00298703	0.00298703	CSHL1
1920	-0.0029866	0.0029866	CFAP57
1921	0.00298557	0.00298557	OGDH
1922	0.00298546	0.00298546	TSC22D3
1923	0.00298405	0.00298405	CLTC
1924	-0.00298322	0.00298322	TNNT1
1925	-0.00298228	0.00298228	PRRG2
1926	0.00298207	0.00298207	GPR35
1927	0.00298122	0.00298122	IL16
1928	0.00298072	0.00298072	TTC14
1929	0.00298071	0.00298071	LRFN3
1930	0.00297989	0.00297989	HDGFRP2
1931	-0.00297875	0.00297875	QTRT1
1932	0.00297834	0.00297834	SLC6A19
1933	0.00297771	0.00297771	RTCB
1934	0.00297713	0.00297713	BCLAF1
1935	0.00297688	0.00297688	PIK3R4
1936	0.00297644	0.00297644	ENTPD5
1937	-0.00297636	0.00297636	ANKZF1
1938	0.00297629	0.00297629	LRRC8E
1939	0.00297548	0.00297548	CPTP
1940	0.00297404	0.00297404	HOXB3
1941	0.00297312	0.00297312	ARRDC2
1942	0.00297283	0.00297283	ZFP28
1943	0.00297231	0.00297231	NDN
1944	0.00297004	0.00297004	RPN1
1945	0.00296954	0.00296954	XPNPEP1
1946	-0.00296946	0.00296946	HDAC8
1947	0.00296836	0.00296836	TUBA8
1948	0.00296816	0.00296816	GPR137
1949	0.0029672	0.0029672	IRX4
1950	-0.00296555	0.00296555	LDHA
1951	-0.00296496	0.00296496	DNMBP
1952	-0.00296496	0.00296496	COL4A5
1953	-0.00296457	0.00296457	ZZEF1
1954	-0.00296452	0.00296452	FFAR1
1955	-0.00296431	0.00296431	IFT57
1956	-0.00296307	0.00296307	MAPK12
1957	-0.00296222	0.00296222	MTFR1L
1958	-0.00296192	0.00296192	SLC4A7
1959	-0.00296171	0.00296171	SLC17A3
1960	-0.00296156	0.00296156	PALLD
1961	-0.00296121	0.00296121	LY96
1962	0.00296096	0.00296096	ELOF1
1963	-0.00296083	0.00296083	OXSM
1964	-0.0029595	0.0029595	ORMDL3
1965	0.00295927	0.00295927	SNX9
1966	-0.00295887	0.00295887	HIGD1A
1967	0.0029585	0.0029585	PLIN2
1968	-0.00295642	0.00295642	CNBD2
1969	0.00295582	0.00295582	DOK4
1970	0.00295429	0.00295429	CFHR3
1971	-0.00295428	0.00295428	RCAN1
1972	0.00295414	0.00295414	TAOK2
1973	-0.00295414	0.00295414	FAM46D
1974	-0.00295398	0.00295398	SULT1A1
1975	0.0029535	0.0029535	HS3ST3A1
1976	0.00295309	0.00295309	B3GNT6
1977	-0.0029529	0.0029529	ARHGEF2
1978	0.00295259	0.00295259	KHDRBS1
1979	0.00295257	0.00295257	SMAD4
1980	-0.00295256	0.00295256	KRTAP13-1
1981	0.0029521	0.0029521	KLHL26
1982	-0.00295202	0.00295202	CHPF
1983	0.00295163	0.00295163	OR5K1
1984	0.00295091	0.00295091	CREB5
1985	-0.00295078	0.00295078	OR9A4
1986	-0.00295012	0.00295012	OR3A2
1987	-0.00294912	0.00294912	BPIFA1
1988	-0.00294901	0.00294901	SPACA1
1989	-0.00294879	0.00294879	MROH2B
1990	-0.00294836	0.00294836	DNAJC17
1991	-0.00294824	0.00294824	ALPK2
1992	-0.00294748	0.00294748	CRTAC1
1993	0.0029473	0.0029473	SUMO3
1994	0.00294729	0.00294729	CIC
1995	-0.00294617	0.00294617	CYP11B2
1996	0.00294616	0.00294616	LIMCH1
1997	0.00294558	0.00294558	CD1E
1998	0.00294508	0.00294508	BRSK2
[truncated: 14,744 more rows]

## Sheet: Con_grad
rank	value	abs	SYMBOL
1	-0.134821	0.134821	GFAP		The rankings in this one Sheet were obtained through control group calculations.
2	-0.0904835	0.0904835	MT1F
3	0.0827875	0.0827875	SLC1A3
4	-0.0827274	0.0827274	RPL31
5	-0.0718323	0.0718323	CSRP1
6	0.070799	0.070799	MTURN
7	0.068025	0.068025	ZNF417
8	-0.065341	0.065341	FAM107A
9	0.0650879	0.0650879	PLP1
10	-0.0637766	0.0637766	CHGA
11	0.0635348	0.0635348	MT3
12	0.0631084	0.0631084	CAMK2A
13	-0.0583544	0.0583544	CAMK2N1
14	0.0575532	0.0575532	SPARC
15	0.0539159	0.0539159	ZNF91
16	-0.0526582	0.0526582	RPL38
17	-0.0526494	0.0526494	N4BP2
18	0.0524607	0.0524607	SCIN
19	-0.0517837	0.0517837	RAB3A
20	0.0517188	0.0517188	ALDOC
21	-0.0514955	0.0514955	ZNF652
22	0.0509925	0.0509925	FAM98B
23	0.0495315	0.0495315	C1orf61
24	0.0491906	0.0491906	ACTB
25	0.0459504	0.0459504	C11orf58
26	-0.0450174	0.0450174	GABPB2
27	0.0442022	0.0442022	FSIP2
28	-0.0441586	0.0441586	GFOD1
29	0.0440126	0.0440126	PEA15
30	-0.0436844	0.0436844	PTN
31	-0.0430735	0.0430735	GNA11
32	0.0423751	0.0423751	CLU
33	-0.0414639	0.0414639	RPL19
34	0.040794	0.040794	PJA2
35	-0.0404591	0.0404591	ATP1A3
36	-0.0401033	0.0401033	HIST1H4C
37	0.0399867	0.0399867	TUBB2B
38	-0.039228	0.039228	FBXL22
39	-0.0389276	0.0389276	GOLGA2
40	0.0385455	0.0385455	APOE
41	0.0384709	0.0384709	IFI6
42	0.0383598	0.0383598	GPM6A
43	0.0383204	0.0383204	SDC3
44	-0.0377122	0.0377122	ATP6V0C
45	-0.03637	0.03637	RPL4
46	-0.036355	0.036355	BLZF1
47	0.0356617	0.0356617	PMP2
48	0.0355318	0.0355318	HSPA1B
49	0.0342054	0.0342054	NPIPA1
50	-0.0336757	0.0336757	OLAH
51	0.0335746	0.0335746	SV2B
52	0.0335742	0.0335742	CHN1
53	-0.0333602	0.0333602	EEF1A1
54	0.032916	0.032916	LLPH
55	-0.0325713	0.0325713	SYAP1
56	-0.0324597	0.0324597	GLTSCR2
57	0.0324159	0.0324159	GP1BB
58	0.0314121	0.0314121	TAGLN3
59	-0.0310769	0.0310769	H1F0
60	-0.0308898	0.0308898	NDUFA4
61	-0.0307689	0.0307689	CNOT2
62	-0.0306113	0.0306113	PNPLA8
63	-0.0302078	0.0302078	REEP5
64	0.0301445	0.0301445	RPL24
65	0.0301011	0.0301011	VWF
66	0.0297465	0.0297465	DDN
67	0.0295787	0.0295787	TCF7
68	0.0295591	0.0295591	FTH1
69	0.0293796	0.0293796	CPE
70	0.0293193	0.0293193	HBB
71	-0.0290387	0.0290387	MSH3
72	-0.0289116	0.0289116	RPS14
73	-0.0286245	0.0286245	RPL11
74	-0.0286166	0.0286166	PDLIM5
75	-0.0284855	0.0284855	SPP1
76	-0.0283262	0.0283262	ZIC2
77	0.0277405	0.0277405	GLUD1
78	0.0273836	0.0273836	SEPT5
79	-0.0273597	0.0273597	RPL5
80	0.0272991	0.0272991	IFITM3
81	-0.0272102	0.0272102	PTGDS
82	-0.0271935	0.0271935	CKB
83	-0.0271647	0.0271647	NEFH
84	-0.0270614	0.0270614	MAPK3
85	0.0269693	0.0269693	ENO2
86	0.026879	0.026879	CELF5
87	0.0266735	0.0266735	WSB2
88	-0.0266517	0.0266517	CCNI
89	-0.026642	0.026642	EEF1G
90	-0.0266294	0.0266294	CBX6
91	-0.0265939	0.0265939	PFKP
92	0.0264649	0.0264649	SNAPC1
93	-0.0264458	0.0264458	PTMA
94	0.0264128	0.0264128	ATP6V1B2
95	-0.0263376	0.0263376	PSMC5
96	-0.026117	0.026117	NUCKS1
97	0.0261001	0.0261001	PRRT2
98	-0.0260124	0.0260124	PSMA7
99	0.0260024	0.0260024	ELMOD3
100	-0.0259886	0.0259886	ZIC1
101	-0.0258439	0.0258439	CALM1
102	-0.0256712	0.0256712	RPS24
103	0.0254721	0.0254721	ZNF492
104	0.0254545	0.0254545	SEPT2
105	-0.0254367	0.0254367	RPL35
106	-0.0253481	0.0253481	ALKBH5
107	-0.0253007	0.0253007	YWHAH
108	0.025296	0.025296	RPL41
109	0.0249786	0.0249786	TUBA1A
110	0.0248861	0.0248861	ZNF623
111	0.0248468	0.0248468	RPS26
112	-0.0246119	0.0246119	SPOP
113	0.0246055	0.0246055	METTL7A
114	-0.0241589	0.0241589	MT2A
115	-0.0239943	0.0239943	STOX2
116	0.0239336	0.0239336	PPP2R1A
117	0.0239057	0.0239057	RTN1
118	0.0237467	0.0237467	TSPOAP1
119	-0.023642	0.023642	TPT1
120	-0.0236079	0.0236079	MT1G
121	0.023514	0.023514	ARPC3
122	0.0233734	0.0233734	HEY1
123	-0.0231994	0.0231994	PEG3
124	0.0230732	0.0230732	RGS4
125	0.022938	0.022938	GAP43
126	0.022855	0.022855	SNX10
127	-0.0227897	0.0227897	ARSK
128	-0.022661	0.022661	LMTK3
129	0.0223883	0.0223883	STXBP4
130	0.0223687	0.0223687	PPDPF
131	0.0222948	0.0222948	UQCR10
132	0.0218303	0.0218303	CYP4F3
133	-0.0218062	0.0218062	DIP2B
134	0.0216923	0.0216923	PRNP
135	-0.0216212	0.0216212	ADD3
136	0.0215897	0.0215897	ATP6V0A1
137	-0.0214538	0.0214538	GPRC5B
138	-0.0214401	0.0214401	MT1H
139	0.0213687	0.0213687	TMBIM6
140	-0.0213094	0.0213094	JUND
141	-0.0212926	0.0212926	MRAS
142	-0.0212588	0.0212588	MXD4
143	0.0212502	0.0212502	ENC1
144	-0.0211577	0.0211577	H1FX
145	0.0211086	0.0211086	NAPB
146	0.021056	0.021056	AHCYL1
147	0.0208323	0.0208323	ATP6V1E1
148	-0.020799	0.020799	ZNF665
149	-0.0206483	0.0206483	SLPI
150	-0.020633	0.020633	RPS4Y1
151	-0.0205789	0.0205789	NACA
152	0.0204442	0.0204442	DYNC1H1
153	0.0203772	0.0203772	CIT
154	-0.0203202	0.0203202	TMBIM4
155	0.0203028	0.0203028	SRP14
156	-0.0202986	0.0202986	SLFN13
157	-0.0201929	0.0201929	HINT1
158	0.020061	0.020061	NRN1
159	0.0200205	0.0200205	CTXN1
160	0.0199866	0.0199866	MGEA5
161	-0.0199657	0.0199657	TRIM74
162	-0.019891	0.019891	RPS25
163	-0.0198543	0.0198543	MGLL
164	-0.0198517	0.0198517	S100A6
165	0.0198229	0.0198229	NRSN1
166	0.0197721	0.0197721	DDAH1
167	0.0197144	0.0197144	TUBB2A
168	0.019707	0.019707	SPARCL1
169	-0.0195358	0.0195358	SYDE2
170	0.019434	0.019434	ACADVL
171	0.0192774	0.0192774	FCGBP
172	0.0192397	0.0192397	VSNL1
173	-0.0191976	0.0191976	RPL18A
174	0.0191698	0.0191698	NCS1
175	0.0191688	0.0191688	TPP1
176	0.019126	0.019126	ETNPPL
177	0.01912	0.01912	EID1
178	0.0190759	0.0190759	CALY
179	-0.0190628	0.0190628	ZNF358
180	0.019053	0.019053	GJA1
181	0.0190344	0.0190344	PFKL
182	0.0189951	0.0189951	KLHL28
183	0.018804	0.018804	SVOP
184	0.0188039	0.0188039	HSP90AB1
185	0.0187875	0.0187875	TMEM9
186	-0.0187785	0.0187785	RERE
187	-0.0187507	0.0187507	RAMP1
188	-0.0187244	0.0187244	LMO4
189	-0.0185552	0.0185552	CEBPD
190	-0.0184364	0.0184364	MIF
191	-0.0183235	0.0183235	RELN
192	0.0183062	0.0183062	SIRPA
193	-0.0181799	0.0181799	YPEL5
194	-0.0180223	0.0180223	PHGDH
195	0.0180157	0.0180157	BEX4
196	0.0179324	0.0179324	RPL37A
197	-0.0179079	0.0179079	APOD
198	0.0178582	0.0178582	SRRM1
199	-0.0178284	0.0178284	RPL12
200	0.0178084	0.0178084	CST3
201	-0.0177476	0.0177476	FBXO2
202	-0.0177408	0.0177408	HSD17B7
203	0.0177292	0.0177292	COL16A1
204	-0.017722	0.017722	CDC42EP4
205	-0.0177093	0.0177093	METTL21A
206	0.0176919	0.0176919	NPTX2
207	0.0176779	0.0176779	SEPT7
208	0.017673	0.017673	HBD
209	-0.0176556	0.0176556	RBPJ
210	-0.0176061	0.0176061	ELK1
211	-0.0176024	0.0176024	2022-03-06
212	-0.017528	0.017528	SH3BGRL3
213	-0.0175198	0.0175198	VIM
214	0.0175182	0.0175182	TBC1D32
215	0.0173549	0.0173549	BAALC
216	-0.0172739	0.0172739	GPR37
217	-0.0172379	0.0172379	ZNF454
218	-0.0171356	0.0171356	CDK2AP1
219	0.017113	0.017113	UBA52
220	0.0171066	0.0171066	CSAD
221	-0.0170661	0.0170661	EEF1D
222	-0.0170283	0.0170283	RPL18
223	0.0170114	0.0170114	TUBA1C
224	-0.0170057	0.0170057	TRIM44
225	0.0169873	0.0169873	CA11
226	0.0169865	0.0169865	LDHB
227	-0.0169248	0.0169248	ARL6IP5
228	0.0168046	0.0168046	ATP5G1
229	-0.016791	0.016791	RPS4X
230	0.0167641	0.0167641	INF2
231	-0.0166137	0.0166137	CLSTN1
232	-0.0166132	0.0166132	RPS6
233	-0.0165294	0.0165294	PRKCB
234	0.0164445	0.0164445	TUBGCP4
235	-0.0163237	0.0163237	NRGN
236	-0.0163054	0.0163054	CCK
237	-0.0163023	0.0163023	PLEKHA1
238	0.0162768	0.0162768	GDI1
239	-0.0162669	0.0162669	SERBP1
240	0.0162606	0.0162606	UBC
241	-0.016209	0.016209	SMG1
242	-0.0162031	0.0162031	FOSB
243	0.0161485	0.0161485	ISG15
244	-0.0160626	0.0160626	HDAC4
245	-0.016056	0.016056	DUSP3
246	-0.0160513	0.0160513	C2orf15
247	0.0159561	0.0159561	HARS
248	0.0159338	0.0159338	NDUFC2
249	0.0158184	0.0158184	ICAM5
250	-0.0157731	0.0157731	ZNF580
251	0.0157235	0.0157235	PPIAL4A
252	0.0157197	0.0157197	MAP2
253	0.0156965	0.0156965	NDUFA5
254	0.0156583	0.0156583	RPS27
255	0.0156395	0.0156395	ZNF667
256	-0.0156167	0.0156167	MARK2
257	0.0155552	0.0155552	RIMBP2
258	0.0155391	0.0155391	EIF1
259	-0.0154631	0.0154631	RPL23A
260	-0.0154166	0.0154166	CYP1B1
261	-0.0154154	0.0154154	DYNLL1
262	0.0153566	0.0153566	BCAS1
263	-0.0152823	0.0152823	SET
264	-0.0152188	0.0152188	MTCH1
265	0.0151814	0.0151814	CHCHD2
266	0.0151524	0.0151524	AQP1
267	-0.015112	0.015112	CNST
268	-0.0150541	0.0150541	TEP1
269	0.0150514	0.0150514	CDK5RAP3
270	0.0150283	0.0150283	SPRED1
271	0.0149972	0.0149972	HAUS2
272	0.014983	0.014983	BSCL2
273	0.0149646	0.0149646	ATP5B
274	0.0149076	0.0149076	ITM2C
275	-0.0148833	0.0148833	MAP6D1
276	-0.0148529	0.0148529	C5orf24
277	-0.0148098	0.0148098	GNAI2
278	-0.0147953	0.0147953	RPS3
279	-0.0147601	0.0147601	CAMK1D
280	0.0147498	0.0147498	RPL37
281	-0.0147491	0.0147491	PBOV1
282	0.014716	0.014716	ADIRF
283	-0.0146914	0.0146914	POU2F1
284	-0.0146903	0.0146903	NDUFB4
285	-0.0146318	0.0146318	NWD1
286	-0.0145589	0.0145589	LPIN1
287	0.0145424	0.0145424	RGL1
288	0.0145266	0.0145266	ATP1A2
289	-0.0144992	0.0144992	APCDD1
290	-0.0144875	0.0144875	SOD1
291	0.0144854	0.0144854	RGS11
292	0.014465	0.014465	OAZ2
293	0.0144365	0.0144365	EIF3C
294	0.0143916	0.0143916	RPSA
295	0.0143149	0.0143149	RPS10
296	-0.0142993	0.0142993	AGO2
297	0.0142863	0.0142863	NDUFV1
298	0.0142841	0.0142841	APOBEC3A
299	0.0142544	0.0142544	PCDHB9
300	-0.01423	0.01423	PVALB
301	-0.0142266	0.0142266	KCNJ10
302	-0.014224	0.014224	WDR34
303	0.0142155	0.0142155	TYMP
304	-0.0141885	0.0141885	CHGB
305	-0.0141807	0.0141807	TCEAL2
306	0.0141765	0.0141765	SAT1
307	-0.0141545	0.0141545	SLC47A1
308	0.0141456	0.0141456	FAIM2
309	-0.0141256	0.0141256	EEF1A2
310	-0.0141036	0.0141036	RPS21
311	0.014101	0.014101	ARGLU1
312	-0.0140961	0.0140961	RPS3A
313	0.0140704	0.0140704	SCD
314	-0.0140581	0.0140581	SNAP25
315	-0.0140273	0.0140273	S100A13
316	0.0140226	0.0140226	ATP6V1D
317	0.0140148	0.0140148	RAB10
318	0.0140015	0.0140015	FGFR3
319	0.0139901	0.0139901	PON2
320	-0.0139387	0.0139387	RPLP1
321	0.0139153	0.0139153	CHD5
322	-0.0139113	0.0139113	PTPRN
323	-0.0138617	0.0138617	ATP1B1
324	0.0138216	0.0138216	FASN
325	0.0138001	0.0138001	C2CD5
326	-0.013737	0.013737	CRABP1
327	-0.0137301	0.0137301	PIH1D3
328	0.0137139	0.0137139	TMEM158
329	0.0137063	0.0137063	STAT2
330	0.0137043	0.0137043	NARS
331	-0.0137034	0.0137034	RPS23
332	0.0137028	0.0137028	HSD17B12
333	-0.0136718	0.0136718	COBL
334	0.0136688	0.0136688	HTRA1
335	-0.0136635	0.0136635	RHOBTB3
336	0.0136593	0.0136593	NOMO1
337	-0.0135759	0.0135759	CLPTM1
338	0.0134881	0.0134881	CDK14
339	-0.0134594	0.0134594	COX5A
340	-0.0134467	0.0134467	ZBTB7A
341	-0.0134249	0.0134249	RDH11
342	-0.0133894	0.0133894	RAD51B
343	0.0133668	0.0133668	XRCC5
344	0.013359	0.013359	SKP1
345	-0.0133361	0.0133361	HP
346	-0.0133129	0.0133129	CXXC5
347	-0.0133038	0.0133038	TCF4
348	0.0132503	0.0132503	PSAT1
349	0.0132111	0.0132111	SERPINA3
350	0.0132022	0.0132022	SPOCK1
351	0.0131771	0.0131771	KIFC2
352	-0.0131289	0.0131289	GDPD1
353	0.0130676	0.0130676	MSRB3
354	-0.0130576	0.0130576	ZRANB1
355	0.0130513	0.0130513	FAHD2A
356	0.0129964	0.0129964	ZNF33A
357	0.0129821	0.0129821	MRPL24
358	-0.0129402	0.0129402	FEZ1
359	-0.0129393	0.0129393	KCNB1
360	0.0128992	0.0128992	SNCG
361	-0.0128951	0.0128951	RACK1
362	-0.0128732	0.0128732	SLITRK4
363	0.0128705	0.0128705	RNASET2
364	0.0128676	0.0128676	STMN3
365	-0.0128612	0.0128612	SLC38A2
366	-0.0128541	0.0128541	KPNA6
367	-0.0128342	0.0128342	ZNF136
368	0.0128335	0.0128335	RAPGEF4
369	-0.0128014	0.0128014	WDR82
370	0.0127878	0.0127878	NPTN
371	-0.0127598	0.0127598	TTR
372	-0.0127363	0.0127363	FOXP1
373	-0.0127056	0.0127056	COX7C
374	-0.0126855	0.0126855	ATP5A1
375	-0.0126643	0.0126643	FAU
376	0.0126598	0.0126598	RPS20
377	0.0126149	0.0126149	RPH3A
378	-0.012604	0.012604	HSPA6
379	0.0125796	0.0125796	MAN2C1
380	-0.0125552	0.0125552	SCN11A
381	-0.0125434	0.0125434	CEMIP
382	-0.0125378	0.0125378	ATP1A1
383	0.012527	0.012527	ATG10
384	0.0125212	0.0125212	GPT2
385	0.0125162	0.0125162	MT1X
386	-0.0125045	0.0125045	DUSP8
387	-0.0125016	0.0125016	SH3GL2
388	0.0124922	0.0124922	PPP3R1
389	0.0124676	0.0124676	CHMP4B
390	-0.0124517	0.0124517	CUEDC1
391	-0.012422	0.012422	BLOC1S1
392	0.012421	0.012421	DNAJA2
393	-0.0123955	0.0123955	TTC17
394	-0.0123564	0.0123564	NT5C2
395	-0.0123348	0.0123348	MCM8
396	0.0123253	0.0123253	PAM
397	0.012321	0.012321	SCN2A
398	-0.0123155	0.0123155	CERS6
399	0.0122522	0.0122522	SMIM14
400	0.0122335	0.0122335	TMSB4X
401	-0.0122226	0.0122226	GABRA1
402	0.0121148	0.0121148	NDRG2
403	0.0121111	0.0121111	FABP5
404	0.0121026	0.0121026	SCRG1
405	-0.0120736	0.0120736	RRAGC
406	0.0120112	0.0120112	NDRG4
407	-0.0119962	0.0119962	REEP2
408	-0.01198	0.01198	RCAN2
409	-0.0119783	0.0119783	ZYG11B
410	0.0119017	0.0119017	FADS2
411	-0.0118779	0.0118779	GRIA2
412	0.0118674	0.0118674	PDK4
413	-0.0118606	0.0118606	PTTG1IP
414	0.0118561	0.0118561	CABP1
415	0.0118422	0.0118422	RTN3
416	0.0118296	0.0118296	COX4I1
417	0.0118186	0.0118186	HBA1
418	-0.0118122	0.0118122	NFIA
419	0.0118059	0.0118059	RAP1GAP
420	-0.0117972	0.0117972	DUSP19
421	0.0117855	0.0117855	RPL27
422	0.0117478	0.0117478	SRSF5
423	0.0117445	0.0117445	KLF9
424	-0.0117272	0.0117272	HAPLN4
425	-0.0116919	0.0116919	APLNR
426	-0.0116766	0.0116766	BTG1
427	-0.0116634	0.0116634	LRRC47
428	0.0116526	0.0116526	TMEM59L
429	0.0116526	0.0116526	RPS27L
430	0.0116464	0.0116464	UBB
431	-0.0116241	0.0116241	RGMA
432	0.0116222	0.0116222	SPCS1
433	-0.0116148	0.0116148	ABLIM1
434	0.0115764	0.0115764	CACNG3
435	-0.0115699	0.0115699	RPS8
436	-0.0115381	0.0115381	KCNK12
437	-0.011519	0.011519	VGLL4
438	0.0115123	0.0115123	SARAF
439	0.0115108	0.0115108	TUBB4B
440	-0.0114845	0.0114845	ANKRD44
441	0.0114819	0.0114819	GCSH
442	0.0114706	0.0114706	MAOA
443	-0.011434	0.011434	SPHAR
444	-0.0114208	0.0114208	RPLP2
445	0.0114105	0.0114105	ALPP
446	-0.0114003	0.0114003	SIPA1L1
447	-0.0113963	0.0113963	DUSP26
448	0.0113912	0.0113912	MYH10
449	0.0113782	0.0113782	AK3
450	-0.0113514	0.0113514	ILK
451	-0.0113181	0.0113181	PTOV1
452	0.0113146	0.0113146	TSC22D1
453	0.0112818	0.0112818	CCDC88B
454	0.0112548	0.0112548	ATPAF1
455	-0.0112342	0.0112342	DBT
456	-0.0112262	0.0112262	PFDN5
457	-0.0112098	0.0112098	POU3F2
458	0.0112025	0.0112025	NPY
459	-0.0111723	0.0111723	CYTH1
460	-0.0111701	0.0111701	EXOSC2
461	0.0111593	0.0111593	ZDHHC23
462	-0.0111322	0.0111322	PUM1
463	-0.0111076	0.0111076	SLC25A18
464	0.0110993	0.0110993	HBA2
465	-0.0110852	0.0110852	KLHDC3
466	0.0110763	0.0110763	CLIP3
467	-0.011076	0.011076	CLCN7
468	-0.0110616	0.0110616	TMEM246
469	0.01105	0.01105	TMEM59
470	-0.0110296	0.0110296	ZCCHC24
471	-0.0110295	0.0110295	FAM19A5
472	0.0110194	0.0110194	MAL
473	0.0110037	0.0110037	HES4
474	-0.0110024	0.0110024	SRGAP3
475	0.0110008	0.0110008	RAB40C
476	-0.010994	0.010994	ACSS1
477	0.0109714	0.0109714	PTPRZ1
478	-0.0109648	0.0109648	SNTA1
479	0.0109547	0.0109547	LHX2
480	-0.0109486	0.0109486	SLC13A4
481	0.0109363	0.0109363	F3
482	-0.0109347	0.0109347	POLR2I
483	-0.0109278	0.0109278	VEZF1
484	-0.0109157	0.0109157	AVPI1
485	-0.0108901	0.0108901	VWA1
486	-0.0108864	0.0108864	YBX1
487	0.0108741	0.0108741	FERMT2
488	0.0108318	0.0108318	NEDD8
489	-0.0108195	0.0108195	SLC38A1
490	0.0107974	0.0107974	STK39
491	0.0107602	0.0107602	RPL26
492	0.0107598	0.0107598	BEX1
493	-0.0107429	0.0107429	ZFYVE9
494	0.0107296	0.0107296	STOM
495	-0.0107189	0.0107189	PA2G4
496	-0.0106966	0.0106966	LARP1
497	0.0106536	0.0106536	ZMAT3
498	-0.0106528	0.0106528	ERCC5
499	0.010609	0.010609	TRA2A
500	-0.0106003	0.0106003	HLA-DPB1
501	0.0105989	0.0105989	CES4A
502	0.010579	0.010579	CAMLG
503	0.0105745	0.0105745	ATP6V0B
504	-0.0105572	0.0105572	FUT6
505	0.010553	0.010553	HOPX
506	0.0105267	0.0105267	COX8A
507	0.0105093	0.0105093	BNIP3
508	-0.0104972	0.0104972	ZNF428
509	0.0104962	0.0104962	HSPA9
510	0.0104886	0.0104886	LYRM1
511	-0.0104812	0.0104812	KIAA1109
512	-0.0104709	0.0104709	SLC24A3
513	-0.0104618	0.0104618	OPTN
514	0.0104506	0.0104506	RAB15
515	0.0104416	0.0104416	SPC24
516	0.0104352	0.0104352	TBCA
517	0.0104216	0.0104216	ARNT2
518	-0.0104193	0.0104193	ATP1B3
519	0.0103988	0.0103988	TMBIM1
520	0.0103717	0.0103717	TKT
521	-0.0103684	0.0103684	DYNC1LI2
522	0.0103209	0.0103209	PDHB
523	-0.0103024	0.0103024	NR2F1
524	-0.0102607	0.0102607	SETBP1
525	0.0102494	0.0102494	TMEM74B
526	-0.0102288	0.0102288	MRPL57
527	-0.010227	0.010227	FYN
528	-0.0102166	0.0102166	CNIH2
529	0.0102146	0.0102146	NDUFB5
530	0.0102107	0.0102107	NRCAM
531	-0.0101979	0.0101979	CSDE1
532	0.0101963	0.0101963	IDO2
533	-0.0101939	0.0101939	LMO3
534	-0.0101912	0.0101912	U2AF1
535	0.0101543	0.0101543	CTSB
536	-0.0101499	0.0101499	ZNF671
537	-0.0101244	0.0101244	C1orf43
538	0.0101215	0.0101215	DAPP1
539	0.0101127	0.0101127	TOMM34
540	0.0101042	0.0101042	PPP2R2C
541	0.0100958	0.0100958	SPRY2
542	-0.0100819	0.0100819	ADGRG1
543	-0.0100686	0.0100686	MSI1
544	-0.0100618	0.0100618	RYBP
545	0.0100445	0.0100445	NEUROD6
546	0.0100437	0.0100437	TSC22D4
547	-0.0100365	0.0100365	MAST1
548	-0.010013	0.010013	GAD2
549	-0.0100076	0.0100076	ATCAY
550	-0.00999918	0.00999918	PSMD11
551	-0.00999308	0.00999308	EEF2
552	0.00999156	0.00999156	SHTN1
553	0.0099835	0.0099835	EXOC6B
554	0.0099726	0.0099726	DMC1
555	0.00993558	0.00993558	FEZ2
556	-0.00992873	0.00992873	POLR2F
557	-0.0099107	0.0099107	PTCHD1
558	-0.00990045	0.00990045	GNL3L
559	0.00989815	0.00989815	NDUFA10
560	0.00986659	0.00986659	TMEM256
561	0.00984668	0.00984668	IL4R
562	0.00984622	0.00984622	BCL2L2
563	-0.0098461	0.0098461	RPN2
564	0.00984097	0.00984097	HDDC2
565	0.00984085	0.00984085	CCKBR
566	0.0098128	0.0098128	AP2B1
567	-0.00980806	0.00980806	SYT13
568	0.00980572	0.00980572	TSPAN18
569	-0.00979193	0.00979193	COASY
570	-0.00978697	0.00978697	DNER
571	0.00978506	0.00978506	TMEM63A
572	0.00978423	0.00978423	MANF
573	-0.00977086	0.00977086	AP2S1
574	-0.00976717	0.00976717	OLFM1
575	0.0097642	0.0097642	FKBP1A
576	0.00976277	0.00976277	ATP1B2
577	0.00976026	0.00976026	NPEPL1
578	0.00975868	0.00975868	UBE2V1
579	-0.00975811	0.00975811	TMEM245
580	-0.009745	0.009745	NAA38
581	0.00969411	0.00969411	ENO1
582	-0.00969109	0.00969109	ZNF264
583	-0.00968352	0.00968352	GAPDH
584	-0.00966835	0.00966835	ANKLE1
585	-0.00965019	0.00965019	UBE4A
586	0.00961831	0.00961831	APOLD1
587	0.00959793	0.00959793	AHSA2
588	0.00957239	0.00957239	SGIP1
589	-0.00956166	0.00956166	PODXL2
590	-0.00955852	0.00955852	ALS2
591	-0.00955245	0.00955245	PAX6
592	0.00954139	0.00954139	UBXN2A
593	0.00954068	0.00954068	UCHL1
594	-0.00951636	0.00951636	CAPN1
595	-0.00949636	0.00949636	HIST1H1C
596	-0.00947618	0.00947618	GRIN1
597	-0.00947371	0.00947371	CRLF1
598	0.00944975	0.00944975	SNRNP70
599	0.00943125	0.00943125	OLIG2
600	-0.0094283	0.0094283	SPTAN1
601	-0.00942743	0.00942743	DAAM2
602	0.00940737	0.00940737	GLO1
603	-0.00939743	0.00939743	RPL30
604	0.00936285	0.00936285	DLGAP2
605	-0.00933704	0.00933704	ZNF430
606	-0.00932945	0.00932945	RUSC1
607	0.00932905	0.00932905	DTNB
608	-0.00931597	0.00931597	MLLT11
609	-0.00929788	0.00929788	PIAS4
610	0.00928888	0.00928888	GRIPAP1
611	0.00928355	0.00928355	SLC7A11
612	0.00928258	0.00928258	NDP
613	-0.00927731	0.00927731	ZDHHC8
614	-0.00926284	0.00926284	THUMPD1
615	-0.00924583	0.00924583	SLC22A23
616	-0.00923967	0.00923967	PAFAH1B3
617	-0.00922071	0.00922071	ZFR
618	-0.00921424	0.00921424	ARHGAP1
619	-0.00920888	0.00920888	TBCB
620	-0.0091916	0.0091916	CYLD
621	-0.00919104	0.00919104	PDCD7
622	-0.00918091	0.00918091	VASP
623	0.00917231	0.00917231	NAA10
624	0.0091684	0.0091684	MICAL2
625	-0.00916788	0.00916788	MAPK8IP3
626	0.00916576	0.00916576	MLLT1
627	0.00915837	0.00915837	CCDC14
628	-0.00915016	0.00915016	RPL13A
629	-0.00915002	0.00915002	RAB3IL1
630	-0.00913359	0.00913359	CDH2
631	-0.00912777	0.00912777	FAM200A
632	0.00912098	0.00912098	N4BP2L1
633	-0.00911355	0.00911355	DIP2C
634	0.00910569	0.00910569	VPS8
635	0.00910247	0.00910247	MUM1L1
636	-0.00909162	0.00909162	MAPK8IP1
637	-0.00908045	0.00908045	SEC31A
638	-0.00907985	0.00907985	CHN2
639	-0.00907945	0.00907945	TMEM51
640	0.00907338	0.00907338	PLLP
641	0.00906495	0.00906495	CCDC90B
642	0.00905128	0.00905128	TMEM175
643	-0.00903228	0.00903228	ATRX
644	0.00903161	0.00903161	BAG3
645	0.00901934	0.00901934	NUAK1
646	-0.00898202	0.00898202	LRRFIP1
647	0.00898143	0.00898143	DENND4C
648	-0.00896279	0.00896279	MID1IP1
649	-0.00895895	0.00895895	SPHK2
650	0.00894186	0.00894186	EVL
651	0.0089411	0.0089411	PAAF1
652	-0.00893931	0.00893931	EFHD1
653	0.00892917	0.00892917	SMAD6
654	0.0089095	0.0089095	HBQ1
655	-0.00890052	0.00890052	SNRPD3
656	0.0088991	0.0088991	B2M
657	-0.00889453	0.00889453	DCN
658	-0.00889445	0.00889445	AMER2
659	-0.00889206	0.00889206	H3F3B
660	0.00888587	0.00888587	KLK7
661	-0.00887032	0.00887032	RABGAP1
662	0.00887008	0.00887008	SUGP2
663	0.0088601	0.0088601	PCNT
664	-0.0088482	0.0088482	JDP2
665	-0.00883818	0.00883818	YWHAG
666	-0.00881955	0.00881955	ANKRD9
667	0.00879408	0.00879408	SCAP
668	-0.00878346	0.00878346	NDUFS8
669	-0.00878096	0.00878096	SLC5A3
670	0.00878016	0.00878016	KYAT1
671	-0.00877969	0.00877969	DPF1
672	0.00877369	0.00877369	ACO1
673	-0.00876387	0.00876387	RAB11FIP4
674	0.00874245	0.00874245	TAP1
675	-0.00873159	0.00873159	PAG1
676	-0.00872922	0.00872922	COLGALT2
677	-0.00872386	0.00872386	MKRN1
678	-0.00871873	0.00871873	SEPT9
679	0.00871329	0.00871329	IL18
680	-0.00871276	0.00871276	SATB1
681	0.00870947	0.00870947	FBXL16
682	-0.00870363	0.00870363	TK2
683	0.00869859	0.00869859	PSMB3
684	-0.00868071	0.00868071	UBL5
685	-0.00864514	0.00864514	ISYNA1
686	0.00864244	0.00864244	FBXO15
687	-0.00863763	0.00863763	GOLIM4
688	0.00863182	0.00863182	AP1G2
689	-0.00862897	0.00862897	BTBD2
690	-0.00862862	0.00862862	CCDC3
691	-0.00861677	0.00861677	RASEF
692	0.00861442	0.00861442	SCGB2A2
693	0.00861323	0.00861323	HDHD2
694	0.00861112	0.00861112	RTN4
695	0.00860537	0.00860537	CA10
696	-0.00860254	0.00860254	FAM13B
697	-0.00859873	0.00859873	RABEP1
698	0.00859543	0.00859543	2022-03-02
699	0.00859416	0.00859416	SS18L2
700	-0.00858371	0.00858371	DNAJA1
701	0.00857628	0.00857628	FABP3
702	-0.0085667	0.0085667	YPEL4
703	-0.00856256	0.00856256	CCT7
704	-0.00853932	0.00853932	RBM14
705	-0.00852776	0.00852776	SIK3
706	0.00852171	0.00852171	TRAPPC2L
707	0.00850324	0.00850324	TTC3
708	0.00847229	0.00847229	ZNF419
709	0.00846727	0.00846727	TACC1
710	-0.00844122	0.00844122	PPP1CC
711	-0.00843691	0.00843691	SAFB2
712	-0.00843568	0.00843568	DTX3
713	0.00843195	0.00843195	CPLX1
714	-0.00840744	0.00840744	ZFHX2
715	-0.0083995	0.0083995	GNAO1
716	-0.00839933	0.00839933	EPHB6
717	0.00838864	0.00838864	WBP1
718	-0.00837814	0.00837814	SLC44A4
719	0.0083573	0.0083573	AP3S1
720	0.00835475	0.00835475	QDPR
721	-0.00835049	0.00835049	IRF2BPL
722	0.00834775	0.00834775	GSDMB
723	0.00834672	0.00834672	PAN2
724	-0.00832947	0.00832947	EPB41L3
725	0.00832876	0.00832876	SYP
726	-0.00832823	0.00832823	RPP21
727	-0.0083274	0.0083274	RPL3
728	0.00832714	0.00832714	CANX
729	0.00831612	0.00831612	STX1A
730	-0.00830959	0.00830959	SLIRP
731	-0.00830853	0.00830853	FOXO1
732	-0.00830388	0.00830388	MEF2C
733	0.00829565	0.00829565	PTPN11
734	-0.00829494	0.00829494	MRPL16
735	-0.00828551	0.00828551	PCBP1
736	-0.00828226	0.00828226	RPL36
737	0.00826407	0.00826407	GPR137B
738	0.00825926	0.00825926	YPEL3
739	-0.00824691	0.00824691	CAP2
740	0.00823462	0.00823462	TPI1
741	0.00822376	0.00822376	CBFB
742	0.00822115	0.00822115	SSBP2
743	-0.00821098	0.00821098	PPM1K
744	-0.00820914	0.00820914	SCAMP4
745	0.00820665	0.00820665	SMAD3
746	0.00820585	0.00820585	SULF2
747	0.00820172	0.00820172	PFDN2
748	0.00819901	0.00819901	UBAC1
749	0.0081981	0.0081981	C6orf1
750	0.00819342	0.00819342	TADA3
751	-0.00818638	0.00818638	GADD45G
752	0.00818582	0.00818582	RHOT2
753	-0.00818054	0.00818054	KDM5D
754	-0.00817204	0.00817204	H3F3A
755	0.00817132	0.00817132	POGZ
756	-0.0081675	0.0081675	MAP1A
757	0.00816445	0.00816445	SLITRK2
758	0.00816311	0.00816311	OPALIN
759	-0.00816047	0.00816047	KCND2
760	0.00815558	0.00815558	CYSTM1
761	-0.00814139	0.00814139	CALB1
762	-0.00813472	0.00813472	MTUS1
763	0.00812816	0.00812816	GARNL3
764	0.00811604	0.00811604	FAM120B
765	-0.00811542	0.00811542	TIMP1
766	-0.00809447	0.00809447	VAMP2
767	-0.00808684	0.00808684	N4BP1
768	0.00808255	0.00808255	SLC48A1
769	0.00806431	0.00806431	CCNL2
770	0.00805235	0.00805235	SLC25A11
771	0.00804259	0.00804259	RAB5B
772	0.00804127	0.00804127	CMTM5
773	0.00803493	0.00803493	SLC2A8
774	-0.00803275	0.00803275	SWSAP1
775	0.00802294	0.00802294	NAGPA
776	0.00802158	0.00802158	GABARAPL1
777	0.00800847	0.00800847	S1PR1
778	-0.00799842	0.00799842	EMID1
779	-0.00798678	0.00798678	BGN
780	-0.00796393	0.00796393	FABP7
781	0.00795944	0.00795944	SCG2
782	-0.00795762	0.00795762	CXXC4
783	-0.00795746	0.00795746	EIF2B4
784	-0.00795431	0.00795431	ATXN2
785	0.00794781	0.00794781	PRR13
786	0.00794772	0.00794772	RPL9
787	-0.00794478	0.00794478	TFIP11
788	-0.00792638	0.00792638	KLF4
789	-0.00792439	0.00792439	TAF15
790	0.00792228	0.00792228	SLC47A2
791	-0.00792195	0.00792195	ZNF791
792	-0.0079215	0.0079215	EZR
793	-0.00791697	0.00791697	MOK
794	-0.00791673	0.00791673	MRPS23
795	0.00791653	0.00791653	RNF182
796	-0.00790556	0.00790556	EGR1
797	0.00790019	0.00790019	MGST3
798	-0.00789308	0.00789308	SYNJ2BP
799	-0.00789133	0.00789133	NEBL
800	0.00788732	0.00788732	PRKCG
801	0.00788411	0.00788411	RPS7
802	0.0078832	0.0078832	C1QA
803	-0.00788176	0.00788176	MLF2
804	-0.00788104	0.00788104	KIF3B
805	0.00787734	0.00787734	AMY1A
806	0.00786217	0.00786217	RPS6KL1
807	0.00786066	0.00786066	PSMC3
808	-0.00784445	0.00784445	SLC1A2
809	0.0078411	0.0078411	GANAB
810	0.00783027	0.00783027	PGK1
811	-0.00782948	0.00782948	UBQLN2
812	-0.00782765	0.00782765	YWHAE
813	0.00782093	0.00782093	NSF
814	0.00781858	0.00781858	CALM3
815	0.00781306	0.00781306	PFKM
816	0.00781245	0.00781245	TMEM141
817	0.00780581	0.00780581	NECAB2
818	-0.00779712	0.00779712	MRPS6
819	-0.00779617	0.00779617	SART1
820	0.00779287	0.00779287	PAIP2B
821	0.00779099	0.00779099	LYRM5
822	0.00778568	0.00778568	CEPT1
823	-0.00778087	0.00778087	TOMM40L
824	0.00777626	0.00777626	ALDH2
825	0.00776931	0.00776931	PRDM2
826	0.00775294	0.00775294	CHMP5
827	-0.00774829	0.00774829	BAG6
828	0.00774364	0.00774364	HDGFRP3
829	0.00773628	0.00773628	TFRC
830	-0.00772858	0.00772858	PPP2R5B
831	-0.0077252	0.0077252	LRRN3
832	0.0077172	0.0077172	ATP5F1
833	-0.00771486	0.00771486	SIVA1
834	0.00771259	0.00771259	CAST
835	-0.00770426	0.00770426	CCP110
836	0.0077008	0.0077008	ARL6IP1
837	0.00769682	0.00769682	MORF4L1
838	0.00768583	0.00768583	CTSA
839	0.00768443	0.00768443	IL1B
840	-0.00766922	0.00766922	UBE2R2
841	-0.00766696	0.00766696	ELAVL3
842	-0.00766408	0.00766408	SRSF11
843	-0.00766357	0.00766357	RBM5
844	-0.0076557	0.0076557	PPA1
845	0.0076449	0.0076449	PIGX
846	-0.00764327	0.00764327	FAM104A
847	0.00764211	0.00764211	DCLK1
848	-0.00764147	0.00764147	DYNC1I1
849	0.00762999	0.00762999	RNF11
850	0.00762538	0.00762538	DCAF8
851	0.0076222	0.0076222	KIAA0141
852	-0.00762219	0.00762219	PPP4R1
853	0.00761978	0.00761978	SDF2L1
854	-0.00761858	0.00761858	BRIX1
855	0.00761485	0.00761485	KMO
856	0.00761284	0.00761284	GALNT2
857	0.00761151	0.00761151	FCGR3A
858	0.00761081	0.00761081	GRM4
859	0.00760882	0.00760882	ANKRD37
860	-0.00760747	0.00760747	GINM1
861	0.00760381	0.00760381	METTL2B
862	-0.00759745	0.00759745	SYT1
863	-0.00759293	0.00759293	UBXN1
864	-0.0075891	0.0075891	IGFBP6
865	0.00758803	0.00758803	THBS4
866	0.00758648	0.00758648	MMD
867	-0.00758457	0.00758457	GATAD2A
868	0.00758453	0.00758453	HSPB8
869	0.00758142	0.00758142	CTTNBP2NL
870	0.00758	0.00758	HMGN2
871	-0.00757922	0.00757922	PSD2
872	-0.00757909	0.00757909	ZNF444
873	-0.0075748	0.0075748	XIAP
874	0.00757115	0.00757115	EIF2S3
875	0.00757008	0.00757008	HLA-A
876	-0.00756753	0.00756753	SF1
877	0.0075661	0.0075661	KIFC3
878	0.00756407	0.00756407	FAM131A
879	-0.00755955	0.00755955	AKAP17A
880	-0.00755779	0.00755779	LSS
881	-0.00755357	0.00755357	RPS6KB1
882	0.00755334	0.00755334	IMPA2
883	-0.00754933	0.00754933	NSA2
884	-0.00754828	0.00754828	TRIP6
885	0.00754214	0.00754214	CDK9
886	0.0075366	0.0075366	ARPC5L
887	0.0075336	0.0075336	IL32
888	0.00753092	0.00753092	BACE1
889	-0.00752954	0.00752954	RASL10B
890	0.00752759	0.00752759	FAM50A
891	-0.00752573	0.00752573	RPL10A
892	0.00751436	0.00751436	PRLHR
893	0.00751341	0.00751341	FADS1
894	0.00751258	0.00751258	S100A1
895	0.00750946	0.00750946	DNAL4
896	0.00750721	0.00750721	MRPL17
897	-0.00750541	0.00750541	USP20
898	-0.00750221	0.00750221	PHIP
899	-0.00750171	0.00750171	VPS26A
900	-0.00749123	0.00749123	SCN1A
901	0.00749004	0.00749004	TCTEX1D1
902	0.00748657	0.00748657	RAB14
903	-0.00748576	0.00748576	IGF2
904	-0.00748448	0.00748448	GNAS
905	-0.00748404	0.00748404	MPRIP
906	0.00748384	0.00748384	MYO18B
907	-0.00748025	0.00748025	KLHL42
908	0.00747847	0.00747847	FAM98A
909	0.00747449	0.00747449	PPIP5K1
910	0.00746139	0.00746139	SDHA
911	0.00746088	0.00746088	MSANTD3
912	0.00745768	0.00745768	BAP1
913	0.00745456	0.00745456	ATP6V1H
914	0.00745286	0.00745286	MARCKSL1
915	-0.00744764	0.00744764	ZNF521
916	0.00744306	0.00744306	ASPHD1
917	0.00744219	0.00744219	HOXA5
918	0.00743838	0.00743838	NDUFS7
919	0.00742301	0.00742301	2022-03-01
920	-0.00742026	0.00742026	SPRYD3
921	0.00741716	0.00741716	CYP2C8
922	0.00741076	0.00741076	ECHS1
923	0.00739884	0.00739884	RAC1
924	0.00739671	0.00739671	TUBA1B
925	-0.00739257	0.00739257	ITM2A
926	-0.0073905	0.0073905	SNRPB2
927	0.0073895	0.0073895	S100A8
928	-0.00738673	0.00738673	GPR155
929	-0.00738396	0.00738396	KRTAP19-7
930	-0.00738327	0.00738327	UBA1
931	0.00738244	0.00738244	GSTK1
932	0.00738047	0.00738047	VSIG1
933	-0.00737774	0.00737774	RARG
934	-0.0073771	0.0073771	EPM2AIP1
935	-0.00737702	0.00737702	DDX27
936	0.00737627	0.00737627	EMG1
937	-0.00736459	0.00736459	FHL1
938	-0.00736439	0.00736439	ITPKB
939	0.007362	0.007362	P4HTM
940	0.00735644	0.00735644	SYNE1
941	0.00734984	0.00734984	HIGD1A
942	-0.00734698	0.00734698	NET1
943	-0.0073467	0.0073467	DYNLRB1
944	0.00734597	0.00734597	APOL3
945	-0.00734151	0.00734151	PDHX
946	0.00733773	0.00733773	CD59
947	0.00733732	0.00733732	AIRE
948	0.00733685	0.00733685	NECAP1
949	0.00733097	0.00733097	MFSD10
950	0.0073266	0.0073266	KIAA0513
951	-0.00731961	0.00731961	SEC61B
952	0.00731873	0.00731873	RASAL1
953	-0.00731223	0.00731223	BRSK2
954	0.00730915	0.00730915	SEPW1
955	-0.00730518	0.00730518	DDX1
956	0.00729426	0.00729426	CCDC125
957	0.00729382	0.00729382	GPX3
958	-0.00727426	0.00727426	HMGN3
959	0.00727247	0.00727247	RAD9A
960	0.00726928	0.00726928	MDH2
961	0.00726259	0.00726259	VDAC2
962	-0.0072614	0.0072614	GPRC5A
963	0.00725626	0.00725626	SNCAIP
964	0.00725484	0.00725484	ALG1L
965	0.00725381	0.00725381	MORN1
966	-0.00725094	0.00725094	FAM110B
967	-0.00723917	0.00723917	SMARCA4
968	0.00723762	0.00723762	RPL21
969	0.00723649	0.00723649	PLA2G4D
970	-0.00723358	0.00723358	GABARAP
971	0.00723236	0.00723236	TRIB2
972	0.00723112	0.00723112	PARP16
973	-0.00723033	0.00723033	SFXN5
974	-0.00723016	0.00723016	KCNS2
975	-0.00723	0.00723	USE1
976	0.00722345	0.00722345	KLHDC9
977	0.00722158	0.00722158	HIST1H1D
978	-0.00722056	0.00722056	PTGFR
979	0.00722046	0.00722046	CTSZ
980	0.00722015	0.00722015	SNRNP25
981	0.0072198	0.0072198	RRAGD
982	0.00721717	0.00721717	C1QC
983	-0.00720684	0.00720684	PARD6A
984	0.00720613	0.00720613	NSUN6
985	-0.00719989	0.00719989	AASS
986	-0.00719584	0.00719584	USP22
987	-0.00719183	0.00719183	MDH1
988	0.00718929	0.00718929	RPS6KA1
989	-0.00718892	0.00718892	MAGEB6
990	0.00718343	0.00718343	CWF19L2
991	-0.00718129	0.00718129	EML1
992	0.00718022	0.00718022	ERGIC3
993	-0.00717938	0.00717938	MTIF3
994	0.00717723	0.00717723	ASUN
995	-0.00717593	0.00717593	MTSS1
996	-0.00717466	0.00717466	EIF4A1
997	0.00716937	0.00716937	ALDH5A1
998	0.0071593	0.0071593	FRMD6
999	0.00715538	0.00715538	HTR7
1000	0.00715244	0.00715244	S100A7A
1001	0.00715224	0.00715224	LETMD1
1002	-0.00715207	0.00715207	ARC
1003	0.00715041	0.00715041	DDX58
1004	-0.00714966	0.00714966	MYL10
1005	-0.00714643	0.00714643	MRC2
1006	-0.00714314	0.00714314	TRIP10
1007	0.00714313	0.00714313	PI16
1008	0.00714028	0.00714028	SORCS1
1009	-0.0071365	0.0071365	SEC23IP
1010	-0.0071343	0.0071343	AKIRIN1
1011	-0.00712801	0.00712801	CACNB4
1012	-0.00712555	0.00712555	CHRNG
1013	0.00712402	0.00712402	SQSTM1
1014	-0.00711716	0.00711716	LYN
1015	0.00711543	0.00711543	MRPS18A
1016	-0.00711274	0.00711274	DDX17
1017	-0.0071036	0.0071036	NPAS4
1018	0.00710213	0.00710213	ZNF620
1019	0.00709961	0.00709961	SLC9A9
1020	0.0070945	0.0070945	WARS
1021	-0.00709347	0.00709347	SMYD3
1022	0.00708468	0.00708468	AMY2B
1023	0.00708156	0.00708156	SYTL2
1024	-0.00708081	0.00708081	VHL
1025	-0.00707991	0.00707991	VPS16
1026	0.00707602	0.00707602	FGB
1027	0.00707555	0.00707555	LRRC73
1028	0.00707333	0.00707333	ERAP2
1029	-0.00706959	0.00706959	CKAP2L
1030	-0.0070666	0.0070666	GLUL
1031	-0.00705981	0.00705981	SGK1
1032	0.00705691	0.00705691	ATP5O
1033	-0.00705655	0.00705655	TPGS2
1034	-0.00705486	0.00705486	COL6A2
1035	0.00705482	0.00705482	PITHD1
1036	-0.00705202	0.00705202	KAT6A
1037	-0.00705142	0.00705142	OR1C1
1038	0.00704922	0.00704922	GSKIP
1039	0.0070486	0.0070486	SLC30A3
1040	0.00704576	0.00704576	COL4A5
1041	-0.00704352	0.00704352	NFKBIA
1042	-0.00704336	0.00704336	FN3K
1043	0.00704139	0.00704139	INPP1
1044	0.00704121	0.00704121	ULK2
1045	-0.00704046	0.00704046	ADORA1
1046	0.00703919	0.00703919	RPE
1047	0.00703885	0.00703885	SLC23A3
1048	-0.00703515	0.00703515	SPSB1
1049	-0.00703478	0.00703478	ZNF331
1050	0.00703037	0.00703037	NLRC4
1051	0.00702273	0.00702273	RPS19
1052	-0.00701594	0.00701594	TRIM8
1053	-0.00701421	0.00701421	WASH1
1054	-0.00700646	0.00700646	SNX2
1055	0.00700564	0.00700564	LIG4
1056	0.00700366	0.00700366	LMOD1
1057	0.0070014	0.0070014	EIF1B
1058	-0.00699271	0.00699271	TMSB4Y
1059	0.00699205	0.00699205	DNAJC13
1060	-0.00699205	0.00699205	OR2Z1
1061	0.0069906	0.0069906	LDHA
1062	-0.00698889	0.00698889	APC2
1063	0.00698734	0.00698734	OR10A6
1064	-0.00698642	0.00698642	MAST2
1065	-0.00698315	0.00698315	VSX1
1066	-0.00698102	0.00698102	LYAR
1067	0.00697922	0.00697922	SLC14A2
1068	-0.00697855	0.00697855	STX8
1069	-0.00697828	0.00697828	TCEB1
1070	0.00697345	0.00697345	ZNF202
1071	0.00697267	0.00697267	DSC3
1072	0.00697182	0.00697182	BEX5
1073	-0.00697081	0.00697081	KLK2
1074	-0.00696814	0.00696814	AEBP1
1075	0.00696618	0.00696618	CCND2
1076	-0.00696485	0.00696485	C11orf1
1077	-0.00696325	0.00696325	OR4S1
1078	-0.00696255	0.00696255	B3GLCT
1079	0.00696146	0.00696146	TMEM167A
1080	-0.006961	0.006961	MFGE8
1081	0.00695629	0.00695629	CDC37
1082	-0.00695552	0.00695552	RPS9
1083	0.00695546	0.00695546	GNPDA1
1084	0.00695443	0.00695443	NUTM2F
1085	-0.00695289	0.00695289	LHX6
1086	-0.00695144	0.00695144	CRMP1
1087	-0.00695102	0.00695102	CBR4
1088	-0.00694605	0.00694605	ARHGEF12
1089	-0.00694449	0.00694449	MYL6
1090	0.00694434	0.00694434	DNAJB9
1091	-0.00694333	0.00694333	TIPRL
1092	0.00693877	0.00693877	ZNF570
1093	0.00693769	0.00693769	MYH13
1094	-0.00693623	0.00693623	C9orf43
1095	0.00693185	0.00693185	PRICKLE4
1096	-0.00693136	0.00693136	INPP5A
1097	0.00693125	0.00693125	MYNN
1098	-0.00693117	0.00693117	MYBPC1
1099	0.00693111	0.00693111	ZNF292
1100	-0.00693082	0.00693082	NAPEPLD
1101	-0.00692971	0.00692971	CHRNA5
1102	0.00692929	0.00692929	ACKR4
1103	0.00692784	0.00692784	LAMP5
1104	0.00692777	0.00692777	RPS28
1105	-0.00692726	0.00692726	SLC35A3
1106	0.00692706	0.00692706	NXPH3
1107	-0.00692676	0.00692676	DMAP1
1108	-0.00692494	0.00692494	DCST1
1109	0.00692405	0.00692405	INTS7
1110	-0.00692107	0.00692107	C8orf33
1111	-0.00691908	0.00691908	PSMA6
1112	0.00691097	0.00691097	MBTPS2
1113	-0.00691069	0.00691069	TMEM208
1114	0.00690985	0.00690985	DENND3
1115	-0.00690956	0.00690956	MYH7
1116	0.00690353	0.00690353	PPP1R3C
1117	0.00690336	0.00690336	CXCR2
1118	0.00689961	0.00689961	RBBP9
1119	-0.00689785	0.00689785	FRMPD1
1120	-0.00689482	0.00689482	NPM1
1121	0.00689167	0.00689167	CALM2
1122	-0.00688965	0.00688965	VPS35
1123	0.00688739	0.00688739	ST3GAL3
1124	-0.00688545	0.00688545	RSPRY1
1125	0.0068829	0.0068829	EXOSC6
1126	-0.00688176	0.00688176	MAGEA4
1127	-0.00687839	0.00687839	PTRHD1
1128	-0.00687599	0.00687599	PIEZO2
1129	-0.00687145	0.00687145	CSF3
1130	-0.00686909	0.00686909	AKT1S1
1131	-0.00686713	0.00686713	KCNK5
1132	-0.00686647	0.00686647	IGFBP4
1133	-0.00686634	0.00686634	ZNF555
1134	-0.00686223	0.00686223	CCDC28B
1135	0.00686211	0.00686211	SYDE1
1136	-0.00686168	0.00686168	SLC25A36
1137	-0.00685608	0.00685608	RPL27A
1138	0.0068559	0.0068559	RAB39A
1139	0.00685112	0.00685112	AK1
1140	-0.00685065	0.00685065	SELE
1141	-0.00685024	0.00685024	MED31
1142	-0.00684987	0.00684987	SETD1B
1143	0.00684518	0.00684518	EMD
1144	0.00684239	0.00684239	FOXD4L4
1145	-0.00683833	0.00683833	EFTUD2
1146	-0.00683819	0.00683819	MMP11
1147	0.00683717	0.00683717	SLC25A29
1148	0.00683303	0.00683303	GPR26
1149	-0.00683176	0.00683176	SASH1
1150	-0.00682945	0.00682945	RABGGTA
1151	-0.00682497	0.00682497	MEGF6
1152	0.00682485	0.00682485	ATP6AP2
1153	0.00682305	0.00682305	C12orf74
1154	-0.00682264	0.00682264	DGKG
1155	0.00681846	0.00681846	HSF4
1156	-0.00681639	0.00681639	SKIV2L2
1157	0.0068148	0.0068148	STIM2
1158	0.00681294	0.00681294	TRIM69
1159	-0.00681281	0.00681281	OGDH
1160	-0.0068102	0.0068102	FLYWCH1
1161	0.00680911	0.00680911	VARS2
1162	0.00680864	0.00680864	CYP20A1
1163	0.00680691	0.00680691	ADD1
1164	0.00680586	0.00680586	DDIT3
1165	-0.00680506	0.00680506	WFS1
1166	-0.0068022	0.0068022	SLC22A24
1167	-0.00680196	0.00680196	ITCH
1168	-0.00679959	0.00679959	TECPR1
1169	-0.00679795	0.00679795	RBPMS2
1170	-0.00679786	0.00679786	ANKRD26
1171	0.00679679	0.00679679	TICRR
1172	0.00679589	0.00679589	CPNE6
1173	0.00678898	0.00678898	PPP2CA
1174	0.00678359	0.00678359	PHYHIP
1175	0.00678198	0.00678198	FKBP1B
1176	0.00677848	0.00677848	NDUFB8
1177	0.00677676	0.00677676	FMNL2
1178	0.00677351	0.00677351	FAM133A
1179	-0.00677289	0.00677289	SOCS5
1180	-0.00677139	0.00677139	SLITRK3
1181	0.00677	0.00677	PON3
1182	0.00676782	0.00676782	TBXA2R
1183	-0.00676727	0.00676727	TAF6L
1184	-0.00676572	0.00676572	MFN2
1185	-0.00676374	0.00676374	STAMBPL1
1186	0.00676112	0.00676112	SLC26A10
1187	0.00676012	0.00676012	OR1E1
1188	0.00675805	0.00675805	RHBDL3
1189	-0.00675708	0.00675708	RCVRN
1190	-0.00675654	0.00675654	TPM3
1191	-0.0067544	0.0067544	CAPS2
1192	0.00675237	0.00675237	ZDHHC2
1193	-0.00675016	0.00675016	CMA1
1194	0.00674992	0.00674992	ANKRD24
1195	-0.00674613	0.00674613	RGS6
1196	0.00674557	0.00674557	RSAD2
1197	0.00674545	0.00674545	TMEM130
1198	-0.00674467	0.00674467	SRP72
1199	-0.00673931	0.00673931	RP1L1
1200	0.00673921	0.00673921	RSBN1L
1201	-0.00672984	0.00672984	OR4D1
1202	0.00672888	0.00672888	FAM160B2
1203	0.00672787	0.00672787	PPIL6
1204	0.00672787	0.00672787	H6PD
1205	-0.00672679	0.00672679	DEPTOR
1206	0.00672519	0.00672519	RNF39
1207	-0.00672348	0.00672348	MAP4K2
1208	-0.00672282	0.00672282	GK2
1209	0.00672276	0.00672276	AK9
1210	0.00672058	0.00672058	PURG
1211	0.00671955	0.00671955	LGI4
1212	0.0067184	0.0067184	HAVCR1
1213	0.00671678	0.00671678	LRRC34
1214	-0.00671655	0.00671655	TAF4
1215	0.00671525	0.00671525	C8orf46
1216	0.00671404	0.00671404	MCPH1
1217	0.00671335	0.00671335	ADAMTSL4
1218	-0.00671149	0.00671149	FAM92A1
1219	0.00670974	0.00670974	SPEG
1220	-0.00670789	0.00670789	NELFCD
1221	0.00670768	0.00670768	ALDH3A1
1222	-0.00670581	0.00670581	NEK5
1223	-0.0067036	0.0067036	RPS6KA2
1224	-0.00670283	0.00670283	PRKRA
1225	-0.00670241	0.00670241	PAQR5
1226	-0.00670175	0.00670175	ASB9
1227	-0.00670086	0.00670086	RAN
1228	-0.00669505	0.00669505	ALDH4A1
1229	0.0066939	0.0066939	SULT1A1
1230	-0.006693	0.006693	ATG101
1231	0.00669229	0.00669229	IGFBP5
1232	-0.00668967	0.00668967	TTF2
1233	-0.00668808	0.00668808	SIGLEC5
1234	-0.00668643	0.00668643	B3GALNT1
1235	-0.00668336	0.00668336	HAO2
1236	-0.00668253	0.00668253	CD55
1237	0.00668054	0.00668054	SDR39U1
1238	-0.00667863	0.00667863	NICN1
1239	0.00667854	0.00667854	CCDC63
1240	0.0066768	0.0066768	FIBIN
1241	0.00667636	0.00667636	IL26
1242	0.00667632	0.00667632	KCNAB3
1243	-0.00667589	0.00667589	FAM175A
1244	-0.00667573	0.00667573	CABS1
1245	0.00667573	0.00667573	SDHD
1246	-0.00667512	0.00667512	PPP5C
1247	0.00667209	0.00667209	NKAIN4
1248	-0.00667	0.00667	FGFBP1
1249	-0.00666912	0.00666912	TGFBI
1250	-0.00666498	0.00666498	YEATS2
1251	-0.00666481	0.00666481	MZF1
1252	-0.00666232	0.00666232	POLR2L
1253	0.00666177	0.00666177	NCAPD3
1254	0.00666164	0.00666164	PLEKHH2
1255	-0.00666063	0.00666063	PAFAH2
1256	0.00665819	0.00665819	CLDND1
1257	-0.00665814	0.00665814	CRISP2
1258	-0.00665552	0.00665552	NECAB3
1259	0.00665461	0.00665461	TMEM47
1260	0.0066535	0.0066535	SCGB1A1
1261	0.00665254	0.00665254	STARD5
1262	0.00665013	0.00665013	IRX3
1263	0.00664895	0.00664895	SPA17
1264	0.006648	0.006648	CEBPB
1265	0.00664747	0.00664747	THUMPD3
1266	-0.00664722	0.00664722	BRINP1
1267	-0.00664538	0.00664538	AP1G1
1268	-0.00664388	0.00664388	FUS
1269	0.00664352	0.00664352	SNU13
1270	0.00664108	0.00664108	NELL1
1271	-0.0066409	0.0066409	ZW10
1272	0.00664002	0.00664002	PRKRIP1
1273	-0.00663799	0.00663799	ZNF507
1274	-0.00663604	0.00663604	ZDHHC22
1275	-0.00663598	0.00663598	RIOK1
1276	0.00663532	0.00663532	TNFRSF13C
1277	0.00663476	0.00663476	KIFAP3
1278	0.00663213	0.00663213	GXYLT1
1279	-0.00663073	0.00663073	SUMO3
1280	-0.00662975	0.00662975	SOX8
1281	0.00662698	0.00662698	ZNRF4
1282	0.00662673	0.00662673	TMEM222
1283	0.00662458	0.00662458	CLIC4
1284	-0.00662244	0.00662244	RNF165
1285	-0.0066216	0.0066216	GLTP
1286	0.00661958	0.00661958	TMEM225
1287	0.0066192	0.0066192	BEND3
1288	-0.00661732	0.00661732	SYNM
1289	0.0066172	0.0066172	TSR2
1290	-0.00661617	0.00661617	NOP9
1291	0.00661428	0.00661428	SOCS3
1292	-0.00661319	0.00661319	DGCR2
1293	-0.00661276	0.00661276	TMSB15B
1294	-0.00661003	0.00661003	MRPL44
1295	-0.00660799	0.00660799	NPC2
1296	-0.0066073	0.0066073	OR8D4
1297	-0.00660627	0.00660627	BLVRA
1298	-0.00660479	0.00660479	XRRA1
1299	-0.00660263	0.00660263	PSG4
1300	0.00660153	0.00660153	GPR1
1301	0.00659728	0.00659728	LAYN
1302	0.00659569	0.00659569	PFN2
1303	-0.0065952	0.0065952	PPARGC1A
1304	0.00659216	0.00659216	NXF2
1305	0.00659179	0.00659179	CYBRD1
1306	0.00659066	0.00659066	BCAN
1307	-0.00658768	0.00658768	DPF3
1308	-0.00658673	0.00658673	FYCO1
1309	0.00658459	0.00658459	SDHC
1310	-0.0065832	0.0065832	NKAP
1311	0.00658305	0.00658305	DDX56
1312	-0.00658286	0.00658286	HIST1H2AB
1313	0.00658262	0.00658262	TAS2R9
1314	-0.00658215	0.00658215	HOMER1
1315	-0.00658184	0.00658184	CLEC3A
1316	-0.00658072	0.00658072	POLR3F
1317	-0.0065807	0.0065807	FBN1
1318	-0.00657791	0.00657791	CASP8AP2
1319	-0.00657546	0.00657546	CADM3
1320	0.00657405	0.00657405	CPSF3
1321	-0.00657362	0.00657362	PPP1R9A
1322	0.00657357	0.00657357	TCHH
1323	0.00657124	0.00657124	CYP4F12
1324	-0.00656813	0.00656813	SV2A
1325	-0.00656765	0.00656765	KLHL20
1326	0.00656694	0.00656694	PDE6A
1327	0.00656206	0.00656206	ORC6
1328	0.00656164	0.00656164	MDN1
1329	-0.00655592	0.00655592	GRIK4
1330	0.00655484	0.00655484	ADAM9
1331	-0.00655426	0.00655426	TNS3
1332	-0.00655347	0.00655347	KLF2
1333	-0.00655258	0.00655258	RNF44
1334	-0.00655025	0.00655025	JARID2
1335	0.00654884	0.00654884	PITPNB
1336	-0.00654822	0.00654822	TBL1X
1337	-0.00654757	0.00654757	YTHDC1
1338	0.00654675	0.00654675	SLC25A39
1339	-0.00654279	0.00654279	GABBR1
1340	-0.00654091	0.00654091	PRELP
1341	0.00653868	0.00653868	SYNCRIP
1342	0.00653285	0.00653285	HSPG2
1343	-0.00653261	0.00653261	CAPN2
1344	-0.006532	0.006532	ACOT2
1345	-0.00652994	0.00652994	ZNF273
1346	0.00652921	0.00652921	ODF1
1347	-0.00652897	0.00652897	RHOG
1348	-0.00652879	0.00652879	PI4KAP2
1349	0.00652874	0.00652874	DHH
1350	0.00652868	0.00652868	SLC35F3
1351	-0.00652837	0.00652837	HDGF
1352	0.00652741	0.00652741	SLC9A1
1353	-0.00652576	0.00652576	GRPEL2
1354	0.00652552	0.00652552	PDGFRL
1355	0.00652392	0.00652392	MPP2
1356	0.00652207	0.00652207	MRS2
1357	0.00652038	0.00652038	RNF149
1358	-0.00652022	0.00652022	GPX4
1359	0.00651974	0.00651974	OR6C76
1360	0.00651735	0.00651735	THYN1
1361	0.00651181	0.00651181	CLNS1A
1362	-0.00651176	0.00651176	SAR1A
1363	-0.00650962	0.00650962	LYG2
1364	-0.0065092	0.0065092	DUX1
1365	-0.00650872	0.00650872	APLN
1366	0.00650596	0.00650596	FAM134B
1367	0.00649822	0.00649822	GLB1L2
1368	-0.00649786	0.00649786	ARHGEF5
1369	0.00649751	0.00649751	SLC35B1
1370	0.0064935	0.0064935	IRF9
1371	-0.0064928	0.0064928	NANP
1372	-0.00649227	0.00649227	CCDC92
1373	-0.00649141	0.00649141	SLC35B3
1374	-0.00649135	0.00649135	NDN
1375	0.00648934	0.00648934	HPS6
1376	-0.00648361	0.00648361	SPG21
1377	0.00648336	0.00648336	POLD4
1378	-0.00648312	0.00648312	SMIM12
1379	0.00648283	0.00648283	MRGPRE
1380	0.00648113	0.00648113	NGEF
1381	0.00647551	0.00647551	RANBP3L
1382	0.00647533	0.00647533	HOXD4
1383	0.00647469	0.00647469	CSF1
1384	-0.00647414	0.00647414	KIT
1385	-0.00647314	0.00647314	RPL17
1386	0.00647302	0.00647302	PPARG
1387	-0.00647287	0.00647287	ZNF574
1388	0.00647283	0.00647283	CCS
1389	0.00647175	0.00647175	NRN1L
1390	-0.00647045	0.00647045	E2F2
1391	-0.00646931	0.00646931	ROBO4
1392	0.00646676	0.00646676	HSPB1
1393	-0.00646549	0.00646549	GLRB
1394	0.00646281	0.00646281	LOR
1395	-0.00645931	0.00645931	KRT33A
1396	0.0064566	0.0064566	VPS41
1397	-0.00645656	0.00645656	PF4V1
1398	-0.00645541	0.00645541	ZNF16
1399	0.00645399	0.00645399	NMUR2
1400	-0.0064528	0.0064528	GFPT2
1401	0.00645274	0.00645274	TSPAN6
1402	-0.00645076	0.00645076	FAM171A1
1403	0.00645006	0.00645006	PLEKHA7
1404	0.00644751	0.00644751	CHST14
1405	0.00644712	0.00644712	TSGA13
1406	0.0064469	0.0064469	POMZP3
1407	-0.0064442	0.0064442	DCAF10
1408	-0.00644161	0.00644161	SH3D19
1409	-0.00643873	0.00643873	ENTPD2
1410	0.00643754	0.00643754	ADAM19
1411	-0.00643678	0.00643678	TSPAN8
1412	0.00643666	0.00643666	RASL12
1413	-0.006436	0.006436	PEG10
1414	-0.00643514	0.00643514	SLC12A7
1415	-0.00643231	0.00643231	SOX10
1416	0.00643218	0.00643218	OLA1
1417	0.00643164	0.00643164	COMMD9
1418	-0.00643123	0.00643123	NMT1
1419	-0.00643028	0.00643028	DKK1
1420	0.00642993	0.00642993	CYP2C19
1421	-0.00642948	0.00642948	FLRT3
1422	0.00642867	0.00642867	HEPACAM2
1423	0.00642772	0.00642772	IL5
1424	0.00642705	0.00642705	PGPEP1
1425	0.00642599	0.00642599	MED18
1426	0.00642599	0.00642599	CCDC191
1427	0.00642424	0.00642424	TRIM13
1428	-0.00642066	0.00642066	NUDT13
1429	-0.00642051	0.00642051	GTF2F1
1430	-0.00641923	0.00641923	CRLF3
1431	0.00641823	0.00641823	IFT43
1432	-0.00641747	0.00641747	FBXW8
1433	-0.0064137	0.0064137	PAPSS1
1434	0.00641245	0.00641245	B4GALT7
1435	-0.00641018	0.00641018	MMP7
1436	-0.0064091	0.0064091	MLC1
1437	0.00640899	0.00640899	IFNE
1438	-0.00640887	0.00640887	E2F5
1439	-0.00640841	0.00640841	SLC22A8
1440	0.00640827	0.00640827	TIMP2
1441	-0.0064082	0.0064082	MAPRE1
1442	0.00640602	0.00640602	HIST1H2BA
1443	0.00640452	0.00640452	NPHS1
1444	-0.0063989	0.0063989	FNDC8
1445	-0.00639631	0.00639631	BRPF1
1446	-0.00639407	0.00639407	FAM180B
1447	0.00639225	0.00639225	PKDCC
1448	0.00639188	0.00639188	MITD1
1449	0.00639074	0.00639074	RBM3
1450	0.00638855	0.00638855	PAK6
1451	0.00638841	0.00638841	TESC
1452	0.00638761	0.00638761	OSTN
1453	0.00638599	0.00638599	GSDMD
1454	-0.00638229	0.00638229	GPR142
1455	0.00637979	0.00637979	RAD51AP1
1456	0.00637734	0.00637734	TEX28
1457	0.0063761	0.0063761	CDK2
1458	-0.00637539	0.00637539	MFSD6
1459	-0.00637507	0.00637507	PNKP
1460	0.00637239	0.00637239	LPCAT4
1461	0.00637037	0.00637037	CASP6
1462	-0.00636984	0.00636984	SEMA6D
1463	0.00636798	0.00636798	JAKMIP1
1464	-0.00636512	0.00636512	OGDHL
1465	0.00636304	0.00636304	SLC39A3
1466	0.00636237	0.00636237	GPR32
1467	-0.00636071	0.00636071	ARIH1
1468	0.00635667	0.00635667	MIR99AHG
1469	-0.00635642	0.00635642	ZKSCAN4
1470	-0.00635332	0.00635332	NCKIPSD
1471	0.00635148	0.00635148	ZNF44
1472	0.00635034	0.00635034	MOB4
1473	-0.00634969	0.00634969	PHC2
1474	-0.00634963	0.00634963	RPN1
1475	0.00634623	0.00634623	RAB3B
1476	-0.00634455	0.00634455	SLC26A4
1477	0.00634187	0.00634187	ZCRB1
1478	0.00634123	0.00634123	MMACHC
1479	-0.00634092	0.00634092	GJA9
1480	-0.00633949	0.00633949	SLC16A14
1481	-0.00633913	0.00633913	ASXL3
1482	0.00633799	0.00633799	SLC2A9
1483	-0.00633758	0.00633758	TRMT112
1484	0.00633711	0.00633711	KCNF1
1485	0.00633657	0.00633657	PDHA2
1486	0.00633483	0.00633483	CDK2AP2
1487	0.00633417	0.00633417	NCALD
1488	0.00633359	0.00633359	CNBD2
1489	-0.00633328	0.00633328	ADAR
1490	-0.00633311	0.00633311	ANK3
1491	-0.00633306	0.00633306	TBCE
1492	-0.00633271	0.00633271	ZMYM1
1493	-0.00633226	0.00633226	FKBP11
1494	0.00633204	0.00633204	ACAD11
1495	-0.00632899	0.00632899	ADNP
1496	0.00632429	0.00632429	RAB26
1497	0.00632425	0.00632425	METTL16
1498	0.00632179	0.00632179	PRRC1
1499	0.00631934	0.00631934	CTDP1
1500	-0.00631921	0.00631921	HDGFRP2
1501	-0.00631784	0.00631784	PITPNM1
1502	0.00631739	0.00631739	TMPRSS11D
1503	-0.00631686	0.00631686	NOD2
1504	-0.00631674	0.00631674	PELI1
1505	-0.00631459	0.00631459	TAS2R42
1506	0.00631328	0.00631328	CAPS
1507	-0.00631285	0.00631285	LRRC40
1508	0.00631183	0.00631183	CAMK1G
1509	0.00631118	0.00631118	MGST1
1510	0.00631046	0.00631046	XCL2
1511	-0.00631028	0.00631028	COMMD1
1512	-0.00630992	0.00630992	ZC3H12A
1513	0.00630885	0.00630885	ZDHHC15
1514	0.00630683	0.00630683	GPR135
1515	0.00630462	0.00630462	HS3ST3B1
1516	0.00630194	0.00630194	MAP3K12
1517	0.00630033	0.00630033	MRPS35
1518	0.00629984	0.00629984	KCNIP1
1519	-0.00629611	0.00629611	PRELID3A
1520	0.00629455	0.00629455	MAT2A
1521	-0.00629324	0.00629324	ARL6IP6
1522	-0.00629323	0.00629323	ATG9B
1523	-0.00629253	0.00629253	PIP5K1C
1524	-0.00629078	0.00629078	LRRC8E
1525	0.00628943	0.00628943	TCF7L1
1526	-0.00628823	0.00628823	PIK3R4
1527	0.0062871	0.0062871	SUMO2
1528	0.00628596	0.00628596	MRPS33
1529	-0.00628585	0.00628585	NFIC
1530	0.00628287	0.00628287	SHCBP1L
1531	-0.00628172	0.00628172	LIG1
1532	-0.00628035	0.00628035	ATP5J2
1533	0.00627948	0.00627948	PPP2R3B
1534	-0.00627883	0.00627883	DDOST
1535	-0.00627775	0.00627775	COG7
1536	-0.00627674	0.00627674	GCG
1537	0.00627558	0.00627558	R3HCC1
1538	0.00627506	0.00627506	PUDP
1539	0.00627487	0.00627487	CRBN
1540	0.00627465	0.00627465	SAA2
1541	0.00627345	0.00627345	STX1B
1542	0.00627311	0.00627311	MAPK12
1543	0.00627017	0.00627017	OR9A4
1544	0.00626974	0.00626974	DHX35
1545	-0.0062688	0.0062688	SCGB1D1
1546	0.00626879	0.00626879	PTCD1
1547	0.00626791	0.00626791	BNIP1
1548	0.00626695	0.00626695	PDCD5
1549	0.00626589	0.00626589	MED7
1550	-0.00626583	0.00626583	KPTN
1551	-0.00626546	0.00626546	NFKBID
1552	-0.00626487	0.00626487	MED25
1553	-0.00626444	0.00626444	PLCE1
1554	-0.00626326	0.00626326	CLIP2
1555	0.00626194	0.00626194	RGCC
1556	-0.00626151	0.00626151	GAS7
1557	-0.00625281	0.00625281	PSMA1
1558	-0.00625264	0.00625264	PRPS2
1559	-0.00625102	0.00625102	BSN
1560	-0.00624889	0.00624889	ADIPOR2
1561	-0.00624688	0.00624688	ALAS1
1562	0.00624477	0.00624477	FIS1
1563	0.00624423	0.00624423	FAM64A
1564	-0.00624317	0.00624317	SHKBP1
1565	-0.00624275	0.00624275	CACNA1C
1566	-0.00624222	0.00624222	HNRNPM
1567	0.00624068	0.00624068	ZNF8
1568	-0.00623976	0.00623976	SGCZ
1569	0.00623524	0.00623524	SH2D5
1570	0.00622661	0.00622661	USP15
1571	0.00622477	0.00622477	CHI3L1
1572	-0.00622462	0.00622462	AXDND1
1573	-0.00622445	0.00622445	COTL1
1574	-0.00621946	0.00621946	OR4D5
1575	-0.00621881	0.00621881	CARS2
1576	-0.00621492	0.00621492	DLL3
1577	0.00621408	0.00621408	CAGE1
1578	-0.00621122	0.00621122	MTF1
1579	-0.0062108	0.0062108	HIVEP3
1580	0.00621045	0.00621045	SNX19
1581	-0.00620879	0.00620879	SH2D3C
1582	-0.00620763	0.00620763	ATG12
1583	-0.0062071	0.0062071	ZNF581
1584	0.00620686	0.00620686	JMJD8
1585	0.00620591	0.00620591	SLC25A51
1586	0.00620414	0.00620414	LAPTM4A
1587	0.00620359	0.00620359	DUSP22
1588	0.00620299	0.00620299	SEMA6C
1589	0.00620263	0.00620263	UGT2B28
1590	-0.00620221	0.00620221	SLC35E2B
1591	0.00620151	0.00620151	CRTAC1
1592	-0.00620079	0.00620079	ENSA
1593	-0.0062003	0.0062003	SOX18
1594	-0.00619912	0.00619912	ISCU
1595	0.00619649	0.00619649	LRRC6
1596	-0.00619234	0.00619234	KLHL3
1597	-0.00619094	0.00619094	ALDH3A2
1598	0.00618964	0.00618964	WNT6
1599	0.00618816	0.00618816	GNG4
1600	0.00618781	0.00618781	HPCAL1
1601	0.0061862	0.0061862	A1BG
1602	-0.00618296	0.00618296	SMARCC1
1603	-0.0061809	0.0061809	APCDD1L
1604	0.00617892	0.00617892	RB1CC1
1605	-0.00617589	0.00617589	IMPAD1
1606	-0.00617532	0.00617532	TEKT3
1607	-0.00617163	0.00617163	ZNF547
1608	0.00617136	0.00617136	PEX14
1609	-0.00617009	0.00617009	DOK4
1610	-0.00616939	0.00616939	RRP9
1611	0.0061667	0.0061667	STYX
1612	0.00616498	0.00616498	GDNF
1613	0.00616472	0.00616472	FKBP7
1614	0.00616395	0.00616395	HYDIN
1615	-0.00616123	0.00616123	SHOX2
1616	-0.00616057	0.00616057	SCD5
1617	0.00615878	0.00615878	SLC4A1AP
1618	0.0061581	0.0061581	MOB2
1619	-0.00615598	0.00615598	CD86
1620	-0.0061559	0.0061559	LYRM4
1621	0.0061556	0.0061556	LILRA5
1622	-0.006153	0.006153	CALB2
1623	-0.00615193	0.00615193	RASIP1
1624	-0.00615186	0.00615186	CEP72
1625	0.0061506	0.0061506	OAT
1626	0.00614965	0.00614965	MEA1
1627	-0.0061493	0.0061493	RNF208
1628	-0.00614874	0.00614874	CFHR3
1629	-0.00614869	0.00614869	PRMT1
1630	0.00614786	0.00614786	KRT33B
1631	-0.00614758	0.00614758	ARRB2
1632	0.00614744	0.00614744	PLEKHG5
1633	-0.00614505	0.00614505	PGRMC2
1634	0.00614303	0.00614303	MAN2B2
1635	0.00614238	0.00614238	TNNT1
1636	0.00613977	0.00613977	NIPA1
1637	-0.00613904	0.00613904	NFKBIZ
1638	-0.00613898	0.00613898	POM121
1639	0.00613869	0.00613869	PTK2B
1640	0.00613786	0.00613786	CSRNP2
1641	-0.00613755	0.00613755	B4GALNT4
1642	-0.0061338	0.0061338	COMMD7
1643	0.00613255	0.00613255	SLC9C2
1644	-0.00613153	0.00613153	TEX101
1645	0.00612934	0.00612934	RPL23
1646	0.00612927	0.00612927	PMM2
1647	-0.00612752	0.00612752	STRA6
1648	0.00612707	0.00612707	RCBTB1
1649	-0.00612695	0.00612695	ERMP1
1650	0.00612581	0.00612581	TRMU
1651	-0.00612062	0.00612062	CXCL8
1652	-0.00611805	0.00611805	CYYR1
1653	-0.00611704	0.00611704	GNPAT
1654	-0.00611638	0.00611638	NEU3
1655	0.00611531	0.00611531	OR8K3
1656	0.0061148	0.0061148	PSRC1
1657	-0.00611443	0.00611443	RBBP7
1658	-0.00611366	0.00611366	SBDS
1659	-0.00611221	0.00611221	FAM171A2
1660	0.00611214	0.00611214	PCYT2
1661	-0.00611186	0.00611186	LEF1
1662	0.00611149	0.00611149	PLCB1
1663	0.00611037	0.00611037	MORN4
1664	0.00610919	0.00610919	C19orf43
1665	0.00610842	0.00610842	REEP1
1666	0.00610764	0.00610764	MRPS5
1667	-0.00610715	0.00610715	CYC1
1668	-0.00610685	0.00610685	CRYBA1
1669	0.00610441	0.00610441	CEND1
1670	-0.00610363	0.00610363	MRGPRX2
1671	-0.00610353	0.00610353	KHDRBS1
1672	-0.0061031	0.0061031	SOX13
1673	0.00610215	0.00610215	IFT57
1674	-0.00610196	0.00610196	RBM26
1675	0.00609721	0.00609721	ADAT2
1676	0.00609709	0.00609709	NOD1
1677	0.00609618	0.00609618	CSNK2A1
1678	0.00609587	0.00609587	KLF12
1679	-0.00609368	0.00609368	MAML1
1680	0.00609273	0.00609273	JCHAIN
1681	-0.00609218	0.00609218	LILRA6
1682	0.00609089	0.00609089	ERO1A
1683	0.00608848	0.00608848	TNMD
1684	0.00608677	0.00608677	MUTYH
1685	-0.00608598	0.00608598	PLEKHO2
1686	0.00608563	0.00608563	C12orf40
1687	0.00608371	0.00608371	HAS3
1688	-0.00608224	0.00608224	CCDC94
1689	0.00608222	0.00608222	PPP1R2
1690	0.00608158	0.00608158	C10orf10
1691	-0.00607981	0.00607981	ZNF256
1692	-0.00607742	0.00607742	DSCAM
1693	0.00607645	0.00607645	C3
1694	0.00607467	0.00607467	FAM49B
1695	0.00607343	0.00607343	TRUB1
1696	0.00607218	0.00607218	FIP1L1
1697	0.00607143	0.00607143	NAT10
1698	0.0060712	0.0060712	SCML1
1699	0.00607061	0.00607061	MRPS36
1700	0.00606953	0.00606953	UNC13B
1701	-0.00606818	0.00606818	ZFP28
1702	0.0060672	0.0060672	MAST3
1703	0.00606536	0.00606536	UEVLD
1704	-0.00606162	0.00606162	ZNF319
1705	0.00606151	0.00606151	TEX37
1706	0.00606054	0.00606054	C1orf100
1707	0.00605989	0.00605989	ZNF563
1708	0.00605942	0.00605942	ZBTB6
1709	0.00605911	0.00605911	HEYL
1710	-0.00605797	0.00605797	HSPA14
1711	-0.0060578	0.0060578	ABHD16A
1712	-0.00605708	0.00605708	GBP1
1713	-0.00605423	0.00605423	SYT2
1714	0.00605345	0.00605345	ARL5B
1715	-0.00605047	0.00605047	NR4A1
1716	0.00605023	0.00605023	FOXA1
1717	-0.00605017	0.00605017	PGGHG
1718	0.00604993	0.00604993	GPHN
1719	0.00604916	0.00604916	OGFRL1
1720	-0.00604743	0.00604743	POLR2J
1721	-0.00604684	0.00604684	LYL1
1722	0.00604522	0.00604522	TOPBP1
1723	0.00604498	0.00604498	HSPH1
1724	0.00604391	0.00604391	PPME1
1725	0.00604368	0.00604368	CFAP57
1726	-0.00604325	0.00604325	SLC44A1
1727	-0.00604183	0.00604183	TAT
1728	0.00604075	0.00604075	FAM46D
1729	0.00604069	0.00604069	EHBP1L1
1730	-0.00603927	0.00603927	SLC6A8
1731	-0.00603728	0.00603728	TMEM184C
1732	-0.00603498	0.00603498	PLVAP
1733	0.00603407	0.00603407	PEX5L
1734	-0.00603218	0.00603218	HLA-DRA
1735	0.00603187	0.00603187	KIF6
1736	0.00603025	0.00603025	TTTY5
1737	0.00603009	0.00603009	PRRG2
1738	0.00603004	0.00603004	L3MBTL4
1739	-0.00602866	0.00602866	AHCYL2
1740	0.00602804	0.00602804	CACNG5
1741	0.0060277	0.0060277	ADCY5
1742	0.0060255	0.0060255	OLFML3
1743	0.00602357	0.00602357	CSNK1G1
1744	-0.00602335	0.00602335	MRPS21
1745	0.00601929	0.00601929	RNLS
1746	-0.00601774	0.00601774	CGRRF1
1747	0.00601768	0.00601768	CKAP5
1748	0.00601607	0.00601607	GPATCH3
1749	0.0060149	0.0060149	STK19
1750	-0.00601394	0.00601394	PPP1R13B
1751	0.00601156	0.00601156	CKS2
1752	-0.00600827	0.00600827	FZD3
1753	0.00600779	0.00600779	CCNB3
1754	-0.00600751	0.00600751	PRIM1
1755	0.00600733	0.00600733	ANKRD1
1756	-0.0060031	0.0060031	NAT6
1757	-0.00600226	0.00600226	NOL12
1758	-0.00600182	0.00600182	HBG1
1759	0.00600141	0.00600141	ETFDH
1760	-0.00600124	0.00600124	FAM107B
1761	0.0060003	0.0060003	ARPP21
1762	0.00599651	0.00599651	SOAT1
1763	0.00599569	0.00599569	POMC
1764	0.00599463	0.00599463	CAV1
1765	0.00599313	0.00599313	DRAM2
1766	-0.00599277	0.00599277	CDS1
1767	0.00599199	0.00599199	DHRS11
1768	-0.00599099	0.00599099	MAP3K7
1769	0.00599031	0.00599031	RS1
1770	0.00598778	0.00598778	CDC40
1771	0.00598611	0.00598611	C1D
1772	-0.00598549	0.00598549	RAB41
1773	-0.00598429	0.00598429	TEFM
1774	-0.00598228	0.00598228	BPIFB6
1775	0.00598216	0.00598216	LOC400867
1776	-0.00598162	0.00598162	BAGE3
1777	0.00598025	0.00598025	CDH6
1778	-0.00597954	0.00597954	CAPN9
1779	0.00597815	0.00597815	APEH
1780	-0.00597489	0.00597489	SHMT1
1781	0.00597413	0.00597413	CHAF1A
1782	-0.00597401	0.00597401	ZNF132
1783	0.00597356	0.00597356	RELB
1784	0.00597285	0.00597285	C20orf85
1785	0.00597041	0.00597041	ZDHHC21
1786	-0.00596798	0.00596798	KPNA4
1787	0.00596409	0.00596409	ARHGAP24
1788	-0.00596303	0.00596303	MFSD14A
1789	0.00596296	0.00596296	ARHGAP20
1790	0.00596185	0.00596185	RBM34
1791	0.00595963	0.00595963	CCDC113
1792	0.00595897	0.00595897	HIST1H2AC
1793	0.00595784	0.00595784	ITGA7
1794	0.00595741	0.00595741	RAPH1
1795	-0.00595643	0.00595643	RELA
1796	0.00595641	0.00595641	LMAN2L
1797	-0.00595421	0.00595421	PLEKHM1
1798	-0.00595385	0.00595385	SUCO
1799	-0.00595373	0.00595373	CMTR1
1800	-0.0059504	0.0059504	C15orf41
1801	0.00595003	0.00595003	WDPCP
1802	0.0059498	0.0059498	RPS18
1803	-0.00594972	0.00594972	PCBP4
1804	0.00594921	0.00594921	AUTS2
1805	0.00594909	0.00594909	TUBG2
1806	-0.00594706	0.00594706	COA7
1807	-0.00594659	0.00594659	CPTP
1808	0.00594603	0.00594603	BTBD16
1809	0.00594462	0.00594462	ODAM
1810	-0.00594258	0.00594258	SCRN1
1811	-0.00594203	0.00594203	PRDX4
1812	-0.00593985	0.00593985	BMX
1813	-0.00593978	0.00593978	UBE2L6
1814	0.00593847	0.00593847	ST8SIA3
1815	-0.00593793	0.00593793	C1orf116
1816	-0.00593758	0.00593758	CPSF6
1817	0.00593685	0.00593685	NEU2
1818	-0.00593268	0.00593268	BOLA1
1819	-0.00593097	0.00593097	RGS1
1820	0.00593074	0.00593074	SCARB2
1821	0.00593	0.00593	C2orf69
1822	0.00592953	0.00592953	GTSF1
1823	-0.00592817	0.00592817	CEP126
1824	-0.00592762	0.00592762	OGN
1825	0.00592755	0.00592755	PIK3C2G
1826	-0.00592659	0.00592659	CCL1
1827	-0.00592659	0.00592659	MEX3A
1828	0.00592511	0.00592511	LRRC55
1829	-0.00592472	0.00592472	CRTAM
1830	-0.00592214	0.00592214	SCG5
1831	0.00592147	0.00592147	DECR1
1832	-0.00592036	0.00592036	ARMC8
1833	-0.00591941	0.00591941	ZC3HAV1
1834	0.00591821	0.00591821	SLC2A10
1835	-0.00591714	0.00591714	ITIH6
1836	0.00591701	0.00591701	TTPA
1837	-0.00591534	0.00591534	MTAP
1838	0.00591476	0.00591476	GRHL3
1839	0.00591468	0.00591468	TRDN
1840	0.00591397	0.00591397	PIGP
1841	-0.00591133	0.00591133	IKBKE
1842	0.00591098	0.00591098	FFAR1
1843	0.00591075	0.00591075	RPS27A
1844	-0.00591051	0.00591051	PEF1
1845	0.00590952	0.00590952	UQCRB
1846	-0.00590919	0.00590919	HRASLS2
1847	0.0059086	0.0059086	HOXD13
1848	0.00590617	0.00590617	LRRC29
1849	0.00590563	0.00590563	LIMD2
1850	-0.00590521	0.00590521	SLC5A4
1851	0.00590424	0.00590424	SHISA5
1852	0.00590199	0.00590199	HSD17B1
1853	-0.00590032	0.00590032	MAP3K6
1854	0.00590014	0.00590014	TOMM22
1855	0.00589828	0.00589828	MARS
1856	-0.0058981	0.0058981	WFDC5
1857	-0.00589775	0.00589775	RAD50
1858	-0.00589633	0.00589633	CD4
1859	-0.00589614	0.00589614	LUC7L2
1860	-0.00589579	0.00589579	B3GALT1
1861	0.0058949	0.0058949	DOPEY2
1862	0.00589429	0.00589429	DNMBP
1863	0.00589359	0.00589359	DLAT
1864	-0.00589354	0.00589354	HS3ST3A1
1865	-0.00589205	0.00589205	KDF1
1866	-0.00589192	0.00589192	TBP
1867	-0.00589192	0.00589192	ELOVL4
1868	0.00589187	0.00589187	STK36
1869	0.00589072	0.00589072	OTOP1
1870	0.00588935	0.00588935	NEFL
1871	-0.00588905	0.00588905	NCK2
1872	0.00588781	0.00588781	TM7SF3
1873	-0.00588722	0.00588722	WFDC13
1874	-0.0058871	0.0058871	TUBA8
1875	-0.00588572	0.00588572	NLRP4
1876	0.00588572	0.00588572	AKR1C4
1877	-0.00588351	0.00588351	PRPF40B
1878	-0.00588304	0.00588304	GPR52
1879	0.00588256	0.00588256	FLAD1
1880	0.0058819	0.0058819	RRS1
1881	-0.00587535	0.00587535	OPRK1
1882	-0.00587487	0.00587487	KCNG3
1883	-0.0058738	0.0058738	DLD
1884	-0.00587338	0.00587338	ITGA2B
1885	0.00587021	0.00587021	PCK1
1886	-0.00586839	0.00586839	NR4A3
1887	-0.00586808	0.00586808	XPNPEP1
1888	0.00586681	0.00586681	UGP2
1889	0.00586515	0.00586515	NRG4
1890	0.0058642	0.0058642	ATP2C1
1891	-0.00585957	0.00585957	MAGEB10
1892	-0.00585937	0.00585937	SNAP23
1893	-0.00585856	0.00585856	IPO9
1894	0.00585775	0.00585775	MLLT3
1895	-0.00585765	0.00585765	RPTOR
1896	0.00585677	0.00585677	C10orf82
1897	-0.00585562	0.00585562	NDE1
1898	0.00585526	0.00585526	LBH
1899	0.00585509	0.00585509	GRIN2A
1900	0.00585335	0.00585335	BBS9
1901	-0.00585169	0.00585169	MICU2
1902	0.00585078	0.00585078	LIN9
1903	0.00585072	0.00585072	CDH20
1904	0.00584913	0.00584913	MGC70870
1905	-0.0058484	0.0058484	SSH1
1906	0.00584799	0.00584799	MEAF6
1907	-0.00584656	0.00584656	CNGA2
1908	-0.0058465	0.0058465	PPP2R5E
1909	0.00584626	0.00584626	GCA
1910	0.00584595	0.00584595	PRPF19
1911	0.00584543	0.00584543	KRTAP13-2
1912	0.00584488	0.00584488	LY75
1913	-0.00584483	0.00584483	PRKD3
1914	-0.00584145	0.00584145	AVEN
1915	0.00583976	0.00583976	ZNF687
1916	0.00583857	0.00583857	CHPF
1917	0.00583734	0.00583734	FKBP2
1918	-0.00583427	0.00583427	HEXDC
1919	-0.00583357	0.00583357	OR10G8
1920	0.0058334	0.0058334	NKAIN2
1921	-0.00583165	0.00583165	MRVI1
1922	0.00583102	0.00583102	GPKOW
1923	-0.00582988	0.00582988	SAMD9
1924	-0.00582759	0.00582759	PKD2
1925	-0.00582348	0.00582348	RBMX2
1926	-0.00582218	0.00582218	ZNF681
1927	-0.0058205	0.0058205	LELP1
1928	0.00581794	0.00581794	HGSNAT
1929	-0.00581725	0.00581725	BTN3A3
1930	0.00581379	0.00581379	CEP104
1931	0.00581287	0.00581287	GRB14
1932	-0.00581247	0.00581247	RASA3
1933	0.0058105	0.0058105	NAPRT
1934	-0.0058105	0.0058105	CEP97
1935	-0.00581032	0.00581032	ARHGAP26
1936	-0.00581026	0.00581026	RNF40
1937	0.00581008	0.00581008	AMY2A
1938	0.0058062	0.0058062	GLUD2
1939	0.0058056	0.0058056	FLOT2
1940	-0.00580455	0.00580455	TEX14
1941	0.00580406	0.00580406	TTC8
1942	0.00580372	0.00580372	TEPP
1943	-0.00580341	0.00580341	PSTPIP2
1944	0.00580065	0.00580065	MIR1-1HG
1945	0.00580035	0.00580035	MAP4K5
1946	0.00579975	0.00579975	FICD
1947	-0.00579865	0.00579865	ATG7
1948	-0.00579583	0.00579583	CPQ
1949	-0.00579573	0.00579573	C3orf33
1950	-0.0057944	0.0057944	NSUN7
1951	0.00579125	0.00579125	VAMP4
1952	-0.00578928	0.00578928	CXorf36
1953	0.00578864	0.00578864	IFIT2
1954	-0.00578739	0.00578739	TTI2
1955	-0.00578719	0.00578719	SIX5
1956	0.00578487	0.00578487	DUS4L
1957	0.00578428	0.00578428	PKP1
1958	-0.00578392	0.00578392	FAM161B
1959	-0.00578337	0.00578337	TMEM95
1960	-0.00578231	0.00578231	TMEM79
1961	0.0057801	0.0057801	OXSM
1962	0.0057798	0.0057798	ALOX12B
1963	-0.00577863	0.00577863	OR1D2
1964	0.00577854	0.00577854	HELLS
1965	-0.00577657	0.00577657	PRKACG
1966	0.00577654	0.00577654	ZZEF1
1967	-0.00577654	0.00577654	TAOK2
1968	-0.00577612	0.00577612	CSGALNACT2
1969	-0.00577562	0.00577562	ARRDC2
1970	0.00577475	0.00577475	SCHIP1
1971	0.00577474	0.00577474	MRPS27
1972	-0.00577474	0.00577474	KIAA0930
1973	-0.00577463	0.00577463	NUBP1
1974	0.00577437	0.00577437	CDH3
1975	-0.00577372	0.00577372	B4GALT6
1976	0.00577353	0.00577353	SREK1
1977	-0.00577282	0.00577282	ARHGAP33
1978	-0.00577259	0.00577259	GATA5
1979	0.00577235	0.00577235	TXNIP
1980	0.00577216	0.00577216	HIST1H3A
1981	-0.00577164	0.00577164	PRKAA2
1982	-0.00577104	0.00577104	IL12RB2
1983	-0.00577016	0.00577016	FOXRED2
1984	-0.00577014	0.00577014	ZC3H11A
1985	-0.00576926	0.00576926	IQGAP1
1986	0.00576913	0.00576913	DDX11
1987	0.00576836	0.00576836	DUSP6
1988	-0.0057665	0.0057665	NTM
1989	-0.0057662	0.0057662	ITGB5
1990	-0.00576562	0.00576562	WDR33
1991	-0.0057652	0.0057652	PRSS1
1992	0.0057627	0.0057627	MSX2
1993	-0.00576229	0.00576229	PBXIP1
1994	-0.00575967	0.00575967	HLF
1995	-0.00575883	0.00575883	RAB27B
1996	0.00575717	0.00575717	PTCH2
1997	0.00575693	0.00575693	XKR7
1998	0.00575687	0.00575687	MYZAP
1999	0.0057559	0.0057559	CCDC167
[truncated: 14,743 more rows]
