# Supplementary material for: Sensitivity of substrate translocation in chaperone-mediated autophagy to Alzheimer’s disease progression
Source: Aging (Albany NY). 2024 May 23;16(10):9072–105. doi: 10.18632/aging.205856 (PMC11164475; doi:10.18632/aging.205856)
Supplement: Supplementary File 2 [file aging-16-205856-s004.xlsx]

## Sheet: AD_shap
Supplementary File 2. Result set S_2.
rank	value	abs	SYMBOL
1	0.0145285	0.0145285	MT3		The rankings in this one Sheet were obtained through control group calculations.
2	0.0110895	0.0110895	HBB
3	0.0101904	0.0101904	ALDOC
4	0.0100584	0.0100584	RAB3A
5	-0.00839629	0.00839629	FAM107A
6	0.00788211	0.00788211	C1orf61
7	-0.00674843	0.00674843	SCIN
8	0.00672176	0.00672176	FBXL22
9	-0.0062266	0.0062266	CHGA
10	-0.00603673	0.00603673	GFAP
11	0.00586884	0.00586884	SLC1A3
12	0.00578019	0.00578019	ATP6V0C
13	0.00575161	0.00575161	TUBB2B
14	-0.00510166	0.00510166	SPARC
15	0.00492168	0.00492168	MT1F
16	0.00465038	0.00465038	GOLGA2
17	0.0046009	0.0046009	MTURN
18	-0.00453814	0.00453814	FAM98B
19	0.00452215	0.00452215	ACTB
20	0.00451794	0.00451794	APOE
21	0.00420084	0.00420084	HSPA1B
22	0.00364734	0.00364734	CST3
23	-0.00342743	0.00342743	RPL31
24	0.00329517	0.00329517	ZNF91
25	-0.00321358	0.00321358	RPL35
26	-0.00313761	0.00313761	RPS14
27	0.00305493	0.00305493	PNPLA8
28	0.00300484	0.00300484	PMP2
29	-0.00285351	0.00285351	HIST1H4C
30	0.00284624	0.00284624	HBA2
31	0.00273874	0.00273874	GABPB2
32	0.00272467	0.00272467	IFI6
33	0.00256972	0.00256972	BLZF1
34	-0.00253053	0.00253053	PTN
35	-0.00252148	0.00252148	RPL38
36	0.00247974	0.00247974	SDC3
37	-0.00247272	0.00247272	EEF1A1
38	-0.00243835	0.00243835	RPL4
39	0.00241675	0.00241675	SEPT2
40	0.00239559	0.00239559	HBA1
41	-0.00239241	0.00239241	ZNF623
42	0.00237738	0.00237738	CAMK2A
43	0.00232809	0.00232809	GNA11
44	0.00222835	0.00222835	IFITM3
45	0.00221068	0.00221068	BCAS1
46	-0.00220133	0.00220133	NEFH
47	-0.00217931	0.00217931	CLU
48	0.00217833	0.00217833	RPL41
49	0.00217591	0.00217591	SRP14
50	0.00204832	0.00204832	PPDPF
51	-0.00199067	0.00199067	MT2A
52	-0.00187421	0.00187421	CKB
53	0.00181635	0.00181635	JUND
54	0.00174327	0.00174327	RPSA
55	-0.00165746	0.00165746	SEPT5
56	0.00165687	0.00165687	GLUD1
57	0.00165084	0.00165084	ARSK
58	-0.00164643	0.00164643	CTXN1
59	0.00160368	0.00160368	SYDE2
60	0.00160302	0.00160302	TRIM74
61	0.00159773	0.00159773	PRKCB
62	0.00159064	0.00159064	N4BP2
63	-0.00157842	0.00157842	CAMK2N1
64	0.00155618	0.00155618	VWF
65	-0.00153172	0.00153172	RPL11
66	0.00152157	0.00152157	GFOD1
67	0.00147373	0.00147373	UBB
68	0.00146916	0.00146916	NDUFA4
69	0.00145736	0.00145736	CALM1
70	-0.00145701	0.00145701	CELF5
71	-0.00144928	0.00144928	SLC7A11
72	-0.00142722	0.00142722	TUBGCP4
73	-0.0014148	0.0014148	ZNF492
74	0.00140362	0.00140362	TSC22D4
75	-0.00137785	0.00137785	GPRC5B
76	-0.00137736	0.00137736	FSIP2
77	0.0013737	0.0013737	ZNF652
78	-0.00135794	0.00135794	LLPH
79	-0.00135346	0.00135346	SPP1
80	-0.00134857	0.00134857	RPS21
81	0.00133931	0.00133931	SYAP1
82	-0.00132804	0.00132804	PLP1
83	0.00127746	0.00127746	COX7C
84	0.00126737	0.00126737	YWHAH
85	-0.00124128	0.00124128	CSRP1
86	-0.00123462	0.00123462	ENC1
87	-0.00123308	0.00123308	TUBB2A
88	-0.00123276	0.00123276	RPL19
89	-0.00122905	0.00122905	SHCBP1
90	-0.0012283	0.0012283	APOD
91	0.00121861	0.00121861	TPP1
92	0.00120187	0.00120187	SERPINA3
93	-0.00119175	0.00119175	TPT1
94	0.00116772	0.00116772	MT1X
95	-0.00115358	0.00115358	PTMA
96	0.00110405	0.00110405	NDRG2
97	0.00108661	0.00108661	TMBIM6
98	0.00107044	0.00107044	ZIC1
99	-0.00106699	0.00106699	SV2B
100	-0.0010667	0.0010667	PEG3
101	0.00104287	0.00104287	AHCYL1
102	0.00102426	0.00102426	ATP1A3
103	-0.000999552	0.000999552	GLTSCR2
104	0.000999463	0.000999463	MIF
105	-0.000991634	0.000991634	NUCKS1
106	-0.000989628	0.000989628	RTN1
107	0.000986467	0.000986467	ADIRF
108	-0.000986226	0.000986226	WSB2
109	-0.000985434	0.000985434	PDLIM5
110	0.000982688	0.000982688	PTGDS
111	-0.000974985	0.000974985	RPL23A
112	0.000973752	0.000973752	SLPI
113	-0.000971795	0.000971795	ZNF33A
114	-0.000960525	0.000960525	EEF1G
115	0.000958236	0.000958236	UQCR10
116	-0.000955714	0.000955714	VSNL1
117	0.000955428	0.000955428	REEP5
118	-0.000947808	0.000947808	RPS6
119	-0.000927991	0.000927991	AIRE
120	0.000922691	0.000922691	CNOT2
121	0.000911306	0.000911306	CRYAB
122	0.000909755	0.000909755	CCK
123	-0.000908393	0.000908393	VSIG1
124	0.000908274	0.000908274	ZNF417
125	-0.000887674	0.000887674	RPL18
126	-0.00088754	0.00088754	GDI1
127	-0.000887375	0.000887375	S100A13
128	0.000880663	0.000880663	EIF1
129	0.000873723	0.000873723	STMN3
130	0.000861815	0.000861815	ITM2C
131	-0.000859075	0.000859075	ATP6V0A1
132	0.000857282	0.000857282	RPS10
133	0.000856456	0.000856456	SCD
134	-0.000843952	0.000843952	GAP43
135	-0.000833797	0.000833797	NAPB
136	0.000833673	0.000833673	METTL7A
137	0.000829264	0.000829264	GPM6A
138	-0.000813018	0.000813018	BEX1
139	-0.000800252	0.000800252	ALKBH5
140	-0.000796478	0.000796478	RPS4X
141	0.000790553	0.000790553	CBX6
142	0.000776605	0.000776605	LMTK3
143	0.000767866	0.000767866	HBD
144	-0.000765705	0.000765705	PHGDH
145	0.000762349	0.000762349	NCS1
146	-0.000761407	0.000761407	BSCL2
147	-0.000742557	0.000742557	NPIPA1
148	-0.000732578	0.000732578	CCNI
149	0.000716451	0.000716451	B2M
150	0.000711523	0.000711523	MAPK3
151	-0.000700421	0.000700421	DDN
152	-0.000697385	0.000697385	RPLP1
153	0.000697273	0.000697273	RELN
154	-0.000688469	0.000688469	RGS4
155	-0.000686744	0.000686744	MT1H
156	0.000686521	0.000686521	MGEA5
157	-0.000680935	0.000680935	RPS23
158	0.000672725	0.000672725	RPS27
159	-0.000669777	0.000669777	CPE
160	0.000667833	0.000667833	DYNC1H1
161	-0.000660289	0.000660289	RPL18A
162	-0.000659481	0.000659481	MSRB3
163	-0.00065595	0.00065595	TUBA1A
164	-0.000625467	0.000625467	DMC1
165	-0.000623157	0.000623157	RHOBTB3
166	0.000622734	0.000622734	RNASET2
167	0.000618565	0.000618565	SCRG1
168	-0.000618399	0.000618399	FTH1
169	-0.000614538	0.000614538	ZNF667
170	0.000612029	0.000612029	MAP2
171	-0.000606579	0.000606579	PVALB
172	0.000600696	0.000600696	UBC
173	0.000596286	0.000596286	ATP6V1B2
174	0.00059594	0.00059594	SPARCL1
175	0.00059429	0.00059429	FCGBP
176	-0.000593055	0.000593055	SVOP
177	-0.000592716	0.000592716	KLHL28
178	0.000590558	0.000590558	ATP1A2
179	0.000588751	0.000588751	OLFM1
180	0.000587317	0.000587317	ZIC2
181	0.000583352	0.000583352	PPP2R1A
182	0.000581544	0.000581544	RPS3A
183	-0.000579032	0.000579032	RPL5
184	-0.00057119	0.00057119	ATG10
185	0.000562922	0.000562922	TMSB10
186	-0.000558839	0.000558839	MGLL
187	0.000555781	0.000555781	MTCH1
188	0.000538732	0.000538732	TCEAL2
189	-0.000538193	0.000538193	SCN2A
190	0.000532746	0.000532746	CLDND1
191	0.000527369	0.000527369	CDK2AP1
192	-0.000525742	0.000525742	ELMOD3
193	0.000525029	0.000525029	NRGN
194	-0.000520497	0.000520497	RPL3
195	-0.000519937	0.000519937	IL18
196	0.000519585	0.000519585	MLLT11
197	0.000512977	0.000512977	TRIM44
198	0.000508458	0.000508458	ZNF580
199	0.000505197	0.000505197	NT5C2
200	0.000497113	0.000497113	PSMC5
201	-0.000497005	0.000497005	FAU
202	0.000495208	0.000495208	RPS24
203	0.000492714	0.000492714	ETNPPL
204	0.000485098	0.000485098	EXOSC2
205	0.000483195	0.000483195	MGST3
206	0.000481937	0.000481937	ANKRD44
207	0.000481585	0.000481585	BAALC
208	-0.000477929	0.000477929	ATP1B1
209	-0.00047668	0.00047668	CLIP3
210	0.000475755	0.000475755	SEPW1
211	0.000472707	0.000472707	S100A6
212	0.000471347	0.000471347	COX4I1
213	-0.000454102	0.000454102	UCHL1
214	0.000453599	0.000453599	ATP5B
215	-0.000452853	0.000452853	LDHB
216	-0.000450913	0.000450913	ENO2
217	0.000450185	0.000450185	FGFR3
218	0.000448751	0.000448751	ATPAF1
219	0.000444381	0.000444381	H1FX
220	-0.000443193	0.000443193	HAUS2
221	0.000440268	0.000440268	EEF1A2
222	0.000438424	0.000438424	PJA2
223	0.000436435	0.000436435	SH3GL2
224	0.000434278	0.000434278	TMEM9
225	0.000430591	0.000430591	CYP1B1
226	-0.00042963	0.00042963	CSAD
227	0.00042659	0.00042659	GPT2
228	0.000425439	0.000425439	PON2
229	0.000422261	0.000422261	HSD17B7
230	-0.000419288	0.000419288	CALM2
231	0.000418892	0.000418892	NWD1
232	-0.000416937	0.000416937	GPR37
233	-0.000416779	0.000416779	EFHD1
234	0.000415851	0.000415851	PEBP1
235	0.000415318	0.000415318	RGCC
236	0.00041392	0.00041392	DUSP3
237	-0.000412353	0.000412353	ZCCHC24
238	0.000412193	0.000412193	YPEL5
239	0.000411302	0.000411302	APLNR
240	0.000411258	0.000411258	STOX2
241	0.000409033	0.000409033	ECHS1
242	0.000408088	0.000408088	ATP1B2
243	0.000407891	0.000407891	LMO3
244	-0.00040486	0.00040486	SARAF
245	-0.000403043	0.000403043	EID1
246	-0.000400937	0.000400937	HLA-DPB1
247	0.000399709	0.000399709	RPL27
248	-0.000399664	0.000399664	NDUFC2
249	0.000388383	0.000388383	HSD17B12
250	-0.000384284	0.000384284	STXBP4
251	-0.000382654	0.000382654	CNP
252	-0.000380643	0.000380643	TCF7
253	0.000379884	0.000379884	CHRNA5
254	-0.0003795	0.0003795	C11orf58
255	0.000377813	0.000377813	PEA15
256	0.00037738	0.00037738	BEX4
257	-0.000373747	0.000373747	DAAM2
258	-0.000371312	0.000371312	SNTA1
259	-0.000370974	0.000370974	RPS25
260	0.000363785	0.000363785	VAMP2
261	0.000362959	0.000362959	CANX
262	0.0003614	0.0003614	PTPRN
263	0.000359386	0.000359386	CLSTN1
264	-0.000356357	0.000356357	ZBTB7A
265	0.000349314	0.000349314	SHTN1
266	-0.000347754	0.000347754	SOD1
267	0.000346953	0.000346953	FTL
268	0.000344769	0.000344769	PLLP
269	0.000344694	0.000344694	INF2
270	0.000339804	0.000339804	2022-03-06
271	0.000339031	0.000339031	SAT1
272	0.000335711	0.000335711	FBXO2
273	-0.000334145	0.000334145	SMIM14
274	0.000333918	0.000333918	SRSF5
275	0.000331843	0.000331843	DYNLL1
276	0.000331156	0.000331156	BSN
277	0.000329866	0.000329866	DDAH1
278	0.000324816	0.000324816	TMEM63A
279	0.000324605	0.000324605	CD81
280	-0.000321527	0.000321527	TUBA1B
281	-0.000321414	0.000321414	SEPT7
282	-0.000318976	0.000318976	SYP
283	-0.000318745	0.000318745	GP1BB
284	-0.000318054	0.000318054	TMEM267
285	0.00031606	0.00031606	SYT13
286	0.000315398	0.000315398	HTRA1
287	-0.000314164	0.000314164	RGS11
288	0.000313208	0.000313208	PFKP
289	-0.000311986	0.000311986	HAPLN4
290	-0.000310836	0.000310836	RAMP1
291	0.000310005	0.000310005	PPP3R1
292	-0.00030619	0.00030619	PTTG1IP
293	0.000304109	0.000304109	HINT1
294	-0.000303805	0.000303805	STX1A
295	0.000303719	0.000303719	SLFN13
296	0.000302849	0.000302849	OPALIN
297	-0.00030007	0.00030007	KIFC2
298	-0.000300001	0.000300001	NPC2
299	0.000295331	0.000295331	SMG1
300	-0.000292917	0.000292917	SERBP1
301	0.00029217	0.00029217	DIP2B
302	0.000290997	0.000290997	OLIG2
303	0.000289754	0.000289754	MSH3
304	0.000289049	0.000289049	MXD4
305	0.000289037	0.000289037	ARL6IP5
306	0.000288865	0.000288865	ELK1
307	0.000287214	0.000287214	FERMT2
308	0.000286943	0.000286943	CALB2
309	0.000286859	0.000286859	YWHAE
310	0.000286524	0.000286524	BAG3
311	-0.000285921	0.000285921	OAZ1
312	-0.00028588	0.00028588	RPL9
313	-0.000285193	0.000285193	ATP6V1D
314	-0.000285062	0.000285062	LAMP5
315	0.000283067	0.000283067	SRGAP3
316	0.000282344	0.000282344	TMEM59
317	0.00028154	0.00028154	FABP7
318	0.000279717	0.000279717	MRAS
319	-0.000279212	0.000279212	SNAPC1
320	-0.000278939	0.000278939	GRIA2
321	0.000276462	0.000276462	LRRC47
322	-0.000274801	0.000274801	EEF2
323	0.00027447	0.00027447	RPS28
324	0.000274273	0.000274273	CNIH2
325	-0.000272489	0.000272489	ITM2A
326	-0.000272087	0.000272087	PSMA7
327	-0.000271303	0.000271303	SOX8
328	0.000271019	0.000271019	MT1G
329	-0.000269271	0.000269271	GLUL
330	-0.000268951	0.000268951	RACK1
331	0.000268584	0.000268584	SYT4
332	-0.000267741	0.000267741	NACA
333	0.000267658	0.000267658	TYMP
334	0.000263401	0.000263401	FN3K
335	0.000262502	0.000262502	MAOA
336	-0.000258506	0.000258506	TUBA1C
337	0.00025717	0.00025717	RDH11
338	0.000255644	0.000255644	RPS26
339	-0.000254667	0.000254667	TMEM59L
340	0.000253435	0.000253435	MAL
341	0.000251071	0.000251071	NARS
342	-0.000249931	0.000249931	RGMA
343	0.000249323	0.000249323	PDK4
344	0.000247401	0.000247401	SLC47A1
345	0.000246265	0.000246265	CHCHD2
346	-0.000246257	0.000246257	LDHA
347	-0.000245876	0.000245876	EEF1D
348	-0.000244912	0.000244912	NSF
349	-0.000243617	0.000243617	ADGRG1
350	-0.000242899	0.000242899	ACSS1
351	0.000242498	0.000242498	SLITRK4
352	0.000241178	0.000241178	LHX2
353	-0.000240622	0.000240622	RPS8
354	0.000240515	0.000240515	FAIM2
355	-0.000239823	0.000239823	KCNB1
356	0.0002388	0.0002388	CERS6
357	0.000238336	0.000238336	EPB41L3
358	0.000235783	0.000235783	NEFL
359	-0.00023121	0.00023121	GAPDH
360	0.000228605	0.000228605	HSP90AB1
361	-0.000226367	0.000226367	RPL24
362	0.00022311	0.00022311	SPOCK1
363	-0.000222846	0.000222846	CNST
364	0.000221821	0.000221821	CABP1
365	-0.000220158	0.000220158	GRM4
366	-0.000219769	0.000219769	DNAJB1
367	0.000219446	0.000219446	SPRED1
368	0.000219434	0.000219434	SRRM1
369	-0.000218911	0.000218911	CALY
370	-0.000216376	0.000216376	GNAO1
371	0.000215913	0.000215913	ADD1
372	0.000215659	0.000215659	S100A8
373	0.000215609	0.000215609	MARK2
374	-0.000212951	0.000212951	SRSF11
375	-0.000212837	0.000212837	PLEKHB1
376	0.000211951	0.000211951	YWHAG
377	-0.000210981	0.000210981	SOWAHA
378	-0.000210891	0.000210891	CDC42EP4
379	-0.000210517	0.000210517	SLC25A18
380	0.000210392	0.000210392	CPLX1
381	-0.000209901	0.000209901	VWA1
382	0.000209702	0.000209702	NRSN1
383	0.000208421	0.000208421	MAT2A
384	-0.000207385	0.000207385	COTL1
385	0.000207277	0.000207277	ALDH2
386	0.000207165	0.000207165	ISG15
387	-0.000207029	0.000207029	RPL30
388	0.000205734	0.000205734	CRABP1
389	0.000205721	0.000205721	EIF3C
390	0.000204195	0.000204195	PAQR6
391	0.000201639	0.000201639	SET
392	-0.000201571	0.000201571	CA10
393	-0.00020101	0.00020101	CEBPD
394	-0.000200685	0.000200685	TIMP1
395	0.000200681	0.000200681	BNIP3
396	0.000200168	0.000200168	VIM
397	0.000198868	0.000198868	CDK14
398	-0.000198326	0.000198326	CAMKV
399	0.000197375	0.000197375	RAPGEF4
400	-0.00019496	0.00019496	BRINP1
401	-0.00019493	0.00019493	SLC38A1
402	0.000194554	0.000194554	CRMP1
403	0.000194346	0.000194346	GABBR1
404	0.000193681	0.000193681	NOV
405	-0.000193321	0.000193321	PSMD11
406	-0.000191459	0.000191459	LY6H
407	0.000190936	0.000190936	BASP1
408	0.000190211	0.000190211	MAPK8IP1
409	0.000190198	0.000190198	H1F0
410	0.000190154	0.000190154	POU2F1
411	0.000190075	0.000190075	PFDN2
412	0.000187988	0.000187988	METTL21A
413	0.000187604	0.000187604	CXXC5
414	-0.000187194	0.000187194	VGLL4
415	-0.000186526	0.000186526	CA11
416	-0.000185841	0.000185841	AIF1L
417	0.000185792	0.000185792	CHD5
418	0.000185646	0.000185646	RPL36
419	0.000183031	0.000183031	ATP5O
420	-0.000182303	0.000182303	LMO4
421	0.000181839	0.000181839	TACC1
422	0.000181617	0.000181617	REEP2
423	0.000181416	0.000181416	GABRA1
424	0.0001795	0.0001795	RPS27L
425	0.000178571	0.000178571	KCNH6
426	-0.000177417	0.000177417	PLEKHA1
427	0.000177281	0.000177281	KLHDC3
428	0.000177223	0.000177223	CCDC3
429	-0.00017682	0.00017682	SIPA1L1
430	0.000176446	0.000176446	OLAH
431	-0.000175931	0.000175931	SLC30A3
432	0.000175749	0.000175749	ALS2
433	-0.000175414	0.000175414	PGM2L1
434	0.000174824	0.000174824	GPR137B
435	0.000174241	0.000174241	AP2S1
436	0.000174144	0.000174144	AQP1
437	-0.000172813	0.000172813	PA2G4
438	0.000171519	0.000171519	COX6A1
439	0.000171301	0.000171301	FZD3
440	0.000170156	0.000170156	CIT
441	0.000169951	0.000169951	GRIN1
442	0.000168087	0.000168087	INA
443	0.000166127	0.000166127	GNG7
444	-0.000165975	0.000165975	RAB15
445	-0.000164876	0.000164876	OLIG1
446	0.000164841	0.000164841	SPRYD3
447	0.000164817	0.000164817	PTOV1
448	0.000164768	0.000164768	PAX6
449	-0.000164507	0.000164507	LPIN1
450	0.000164128	0.000164128	CHGB
451	0.00016274	0.00016274	ATP5F1
452	-0.000162573	0.000162573	YWHAZ
453	0.000162061	0.000162061	C3
454	-0.000161785	0.000161785	RPS9
455	0.000160404	0.000160404	S1PR1
456	-0.000160264	0.000160264	CD74
457	-0.000159135	0.000159135	SIRPA
458	-0.000158623	0.000158623	RPL10A
459	-0.000154536	0.000154536	EML2
460	-0.000154534	0.000154534	MAST3
461	0.000153459	0.000153459	RCAN2
462	-0.000153079	0.000153079	FABP3
463	-0.000151265	0.000151265	HMP19
464	0.000150964	0.000150964	SLC48A1
465	-0.000150857	0.000150857	RAB26
466	-0.000150556	0.000150556	DPYSL2
467	0.000150283	0.000150283	RPS5
468	-0.000149855	0.000149855	MDH2
469	0.00014881	0.00014881	APOBEC3A
470	-0.000147933	0.000147933	NPTX2
471	0.000147422	0.000147422	PCP4
472	0.000147377	0.000147377	PIH1D3
473	-0.000147274	0.000147274	ARPC3
474	0.000146508	0.000146508	FEZ2
475	0.000146016	0.000146016	COX8A
476	0.000145996	0.000145996	WBP1
477	-0.000145114	0.000145114	TAGLN3
478	0.000145113	0.000145113	NDUFS8
479	0.000145015	0.000145015	PRR13
480	-0.00014495	0.00014495	KCNS1
481	0.000144942	0.000144942	CHMP4B
482	0.000144784	0.000144784	SETBP1
483	-0.000144005	0.000144005	GNAS
484	-0.000142293	0.000142293	QDPR
485	-0.000142194	0.000142194	HPCAL1
486	0.000141502	0.000141502	AK3
487	-0.000140784	0.000140784	MRFAP1
488	0.000139638	0.000139638	SCARB2
489	0.00013961	0.00013961	KLF9
490	-0.000139417	0.000139417	TTC3
491	-0.000139035	0.000139035	SLC1A2
492	-0.000138592	0.000138592	RPS3
493	-0.000138123	0.000138123	H3F3A
494	0.00013782	0.00013782	HSPA1A
495	0.000137427	0.000137427	SPTAN1
496	-0.000137372	0.000137372	CAMK1D
497	0.000137174	0.000137174	TMEM246
498	0.000137145	0.000137145	MAG
499	0.000136983	0.000136983	RUSC1
500	-0.000136816	0.000136816	ZNF14
501	0.000136766	0.000136766	HSPH1
502	-0.000136535	0.000136535	ZNF665
503	0.000136312	0.000136312	IRF2BPL
504	-0.000135892	0.000135892	SNX10
505	0.000135337	0.000135337	HSPB1
506	0.000135148	0.000135148	KAT6A
507	0.000134231	0.000134231	VPS35
508	0.000134227	0.000134227	SYNM
509	0.000134146	0.000134146	RPS19
510	0.000134094	0.000134094	UBA52
511	0.000133508	0.000133508	CEBPB
512	-0.000132964	0.000132964	TMEM130
513	-0.000132676	0.000132676	NECAB2
514	-0.000132575	0.000132575	PABPC1
515	0.000132035	0.000132035	COX5A
516	0.000131694	0.000131694	MORF4L1
517	0.000131651	0.000131651	HMGN2
518	0.000131596	0.000131596	C10orf10
519	0.000131544	0.000131544	C5orf24
520	0.000131487	0.000131487	TOMM34
521	-0.000131163	0.000131163	AHR
522	-0.000130579	0.000130579	PSD2
523	0.00013032	0.00013032	HEXDC
524	-0.000129485	0.000129485	TCF4
525	0.000129256	0.000129256	NDUFS7
526	0.000128834	0.000128834	ACADVL
527	0.000127334	0.000127334	PAFAH1B3
528	0.000126901	0.000126901	HSPA9
529	0.000126626	0.000126626	CDK5RAP3
530	0.000126276	0.000126276	LGALS1
531	0.000126109	0.000126109	IL4R
532	0.000125996	0.000125996	FAM200A
533	-0.000124679	0.000124679	SST
534	0.000124441	0.000124441	PCNT
535	-0.000124378	0.000124378	HP
536	0.000124376	0.000124376	ZCCHC12
537	-0.000124166	0.000124166	HPCAL4
538	-0.00012379	0.00012379	PRDX6
539	-0.000123643	0.000123643	RASEF
540	0.000123607	0.000123607	ARHGDIB
541	-0.000122714	0.000122714	ZRANB1
542	0.00012271	0.00012271	DECR1
543	-0.000122538	0.000122538	HPCA
544	-0.000122513	0.000122513	MT1M
545	0.000122317	0.000122317	BTBD2
546	-0.000121706	0.000121706	RHOU
547	0.00012144	0.00012144	DCN
548	-0.000120614	0.000120614	GPR1
549	-0.000120012	0.000120012	PLA2G16
550	0.000119957	0.000119957	MOBP
551	-0.000119775	0.000119775	MFGE8
552	0.000119002	0.000119002	SKP1
553	0.000118754	0.000118754	ZNF358
554	-0.000117297	0.000117297	SLC26A4
555	0.000117122	0.000117122	MGP
556	-0.000116487	0.000116487	PAM
557	0.00011641	0.00011641	KLHDC2
558	0.000116234	0.000116234	PAAF1
559	-0.000116134	0.000116134	ZNF620
560	-0.00011561	0.00011561	POLR2F
561	-0.000115591	0.000115591	FBXL16
562	0.000115551	0.000115551	MAP6D1
563	0.00011554	0.00011554	SATB1
564	-0.000115117	0.000115117	ZNF428
565	0.00011471	0.00011471	MCM8
566	0.000114254	0.000114254	RPS18
567	0.000114242	0.000114242	PSD3
568	0.000114179	0.000114179	MBP
569	0.000114117	0.000114117	PSMA6
570	0.000114066	0.000114066	DUSP26
571	-0.000113816	0.000113816	SGSM2
572	0.000113692	0.000113692	SCG5
573	-0.000113267	0.000113267	PIGX
574	0.000112991	0.000112991	OVOL2
575	0.000112681	0.000112681	PRDX1
576	0.000112669	0.000112669	SWSAP1
577	-0.000112411	0.000112411	HMGN3
578	0.000112396	0.000112396	SPOP
579	-0.000111903	0.000111903	SNRNP70
580	0.000111198	0.000111198	CBFB
581	-0.000110541	0.000110541	MLLT1
582	0.000110442	0.000110442	RPS7
583	0.00011041	0.00011041	PIP5K1C
584	-0.000110114	0.000110114	FAM107B
585	0.000109661	0.000109661	SOD3
586	-0.000109406	0.000109406	ATP6V1A
587	0.000109298	0.000109298	PSAT1
588	-0.000109009	0.000109009	AHSA1
589	0.000108757	0.000108757	RPS20
590	-0.000108591	0.000108591	PCBP1
591	-0.000108479	0.000108479	RIMBP2
592	-0.000108444	0.000108444	PPP2CA
593	0.000108298	0.000108298	FAHD2A
594	-0.000108157	0.000108157	RPL21
595	-0.000107968	0.000107968	NEUROD6
596	0.000107887	0.000107887	TNFRSF25
597	0.000107661	0.000107661	FLNA
598	0.000107611	0.000107611	IGFBP4
599	0.000107067	0.000107067	SUV39H2
600	-0.00010696	0.00010696	NUAK1
601	-0.000106654	0.000106654	FEZ1
602	-0.00010651	0.00010651	HIST1H1C
603	-0.000106199	0.000106199	MAPK8IP3
604	-0.000106066	0.000106066	FAM98A
605	0.000105961	0.000105961	ERAP2
606	0.000105839	0.000105839	RRAGC
607	0.0001057	0.0001057	NNAT
608	-0.000105511	0.000105511	CACNG3
609	0.000105293	0.000105293	PPP1R3C
610	-0.000105255	0.000105255	FUT6
611	0.000105215	0.000105215	GNL3L
612	0.000105209	0.000105209	ELOVL4
613	-0.000104918	0.000104918	AMER2
614	0.000104644	0.000104644	COL4A5
615	0.00010452	0.00010452	TUBA3FP
616	0.000104512	0.000104512	PRPF19
617	0.000104409	0.000104409	ATP1A1
618	0.000104273	0.000104273	CA2
619	-0.000104201	0.000104201	FKBP1A
620	0.000104167	0.000104167	TMBIM1
621	0.00010398	0.00010398	SCAP
622	0.000103783	0.000103783	CLIP2
623	-0.000103097	0.000103097	PPM1K
624	-0.000103062	0.000103062	ENO1
625	0.000103026	0.000103026	DYNC1I1
626	0.000102998	0.000102998	MSRB2
627	-0.000102768	0.000102768	CYP46A1
628	0.000102762	0.000102762	NDUFV2
629	0.000102752	0.000102752	NDUFB5
630	0.000102443	0.000102443	SYT1
631	0.000102302	0.000102302	NDN
632	0.00010228	0.00010228	CLDN5
633	0.000102142	0.000102142	PTPRZ1
634	-0.000101546	0.000101546	NECAP1
635	-0.000101504	0.000101504	U2AF1
636	-0.000101423	0.000101423	C2CD5
637	0.000101412	0.000101412	C2orf15
638	-0.000101314	0.000101314	ATP5A1
639	0.000101292	0.000101292	OGN
640	-0.000101292	0.000101292	SLC38A2
641	0.000101003	0.000101003	SV2A
642	0.000100879	0.000100879	LGI4
643	0.000100632	0.000100632	RPL37A
644	0.000100502	0.000100502	IMPDH2
645	-0.000100498	0.000100498	C11orf96
646	-0.000100331	0.000100331	DNER
647	0.000100235	0.000100235	2022-03-02
648	-9.98309e-05	9.98309e-05	ALDH7A1
649	9.97368e-05	9.97368e-05	RAB10
650	-9.92846e-05	9.92846e-05	ALDH4A1
651	-9.91536e-05	9.91536e-05	BIN1
652	-9.90317e-05	9.90317e-05	NEBL
653	9.88429e-05	9.88429e-05	NCOA4
654	-9.85157e-05	9.85157e-05	SH3BGRL3
655	-9.84254e-05	9.84254e-05	NDUFV1
656	9.81616e-05	9.81616e-05	SDHC
657	-9.79752e-05	9.79752e-05	TUBA4A
658	-9.74779e-05	9.74779e-05	MRPL57
659	9.74063e-05	9.74063e-05	CRIP2
660	9.7115e-05	9.7115e-05	RPS12
661	9.68019e-05	9.68019e-05	FABP5
662	9.65704e-05	9.65704e-05	DNAJC7
663	9.64921e-05	9.64921e-05	FCGR3A
664	9.64883e-05	9.64883e-05	TMEM145
665	-9.62742e-05	9.62742e-05	NR2F1
666	-9.60403e-05	9.60403e-05	GNAI2
667	-9.52288e-05	9.52288e-05	MYBPC1
668	9.50375e-05	9.50375e-05	GLRX5
669	9.48279e-05	9.48279e-05	SRP9
670	9.47985e-05	9.47985e-05	DCLK1
671	-9.47537e-05	9.47537e-05	HHATL
672	9.46108e-05	9.46108e-05	FEM1C
673	9.45181e-05	9.45181e-05	ATP5E
674	9.4064e-05	9.4064e-05	UGP2
675	-9.38888e-05	9.38888e-05	TRMT112
676	9.38266e-05	9.38266e-05	VPS26A
677	9.34859e-05	9.34859e-05	PNMAL1
678	9.3118e-05	9.3118e-05	ZNF521
679	-9.25724e-05	9.25724e-05	ATCAY
680	-9.25211e-05	9.25211e-05	SCG2
681	-9.24682e-05	9.24682e-05	NDUFA5
682	9.23027e-05	9.23027e-05	DSTN
683	9.21284e-05	9.21284e-05	BCAN
684	9.20964e-05	9.20964e-05	FIS1
685	-9.1996e-05	9.1996e-05	EIF4G3
686	9.19222e-05	9.19222e-05	TERF2IP
687	9.18172e-05	9.18172e-05	SLC44A4
688	9.17428e-05	9.17428e-05	YPEL3
689	9.15605e-05	9.15605e-05	PFKL
690	9.12592e-05	9.12592e-05	HSPE1
691	-9.11978e-05	9.11978e-05	NPY
692	9.10807e-05	9.10807e-05	NELL2
693	-9.02064e-05	9.02064e-05	TSPOAP1
694	8.9901e-05	8.9901e-05	SOX9
695	-8.97765e-05	8.97765e-05	INIP
696	-8.97456e-05	8.97456e-05	MTUS1
697	-8.91972e-05	8.91972e-05	NDUFB4
698	-8.91864e-05	8.91864e-05	HIGD1A
699	-8.90913e-05	8.90913e-05	DAPP1
700	8.88597e-05	8.88597e-05	PPP2R2C
701	8.87932e-05	8.87932e-05	CERCAM
702	8.87461e-05	8.87461e-05	COL16A1
703	8.86789e-05	8.86789e-05	NQO1
704	-8.84537e-05	8.84537e-05	TADA3
705	8.83109e-05	8.83109e-05	MYL12A
706	8.82837e-05	8.82837e-05	ZFAND5
707	-8.81423e-05	8.81423e-05	TTR
708	-8.75488e-05	8.75488e-05	RPLP2
709	8.72578e-05	8.72578e-05	SDF2L1
710	8.70608e-05	8.70608e-05	TXNIP
711	8.70057e-05	8.70057e-05	RRAGD
712	-8.69978e-05	8.69978e-05	MPRIP
713	8.69234e-05	8.69234e-05	NEFM
714	8.69207e-05	8.69207e-05	SERPINI1
715	-8.68466e-05	8.68466e-05	DYNC1LI2
716	8.67323e-05	8.67323e-05	GDPD1
717	8.56874e-05	8.56874e-05	CEMIP
718	-8.54304e-05	8.54304e-05	TMEM158
719	8.5372e-05	8.5372e-05	KLC2
720	8.50484e-05	8.50484e-05	ARSG
721	-8.49878e-05	8.49878e-05	ADIPOR2
722	8.49078e-05	8.49078e-05	DTNA
723	-8.47128e-05	8.47128e-05	SP100
724	8.45601e-05	8.45601e-05	MRPL41
725	8.44396e-05	8.44396e-05	RUNDC3A
726	8.43839e-05	8.43839e-05	BBOX1
727	8.40448e-05	8.40448e-05	ZNF671
728	8.37443e-05	8.37443e-05	FOSB
729	8.3737e-05	8.3737e-05	SUMO3
730	8.33833e-05	8.33833e-05	PAIP2B
731	-8.32355e-05	8.32355e-05	FKBP1B
732	-8.30928e-05	8.30928e-05	ENPP2
733	8.28949e-05	8.28949e-05	SOBP
734	-8.2888e-05	8.2888e-05	SFXN5
735	8.26626e-05	8.26626e-05	GAD2
736	-8.24494e-05	8.24494e-05	NCKAP1
737	8.23073e-05	8.23073e-05	COX6C
738	-8.22373e-05	8.22373e-05	RASAL1
739	8.22295e-05	8.22295e-05	ANXA5
740	-8.21299e-05	8.21299e-05	DUSP19
741	8.21133e-05	8.21133e-05	SSU72
742	8.20729e-05	8.20729e-05	CAP1
743	8.20311e-05	8.20311e-05	TSR2
744	8.20192e-05	8.20192e-05	ARL6IP1
745	8.19679e-05	8.19679e-05	SEPT9
746	8.19286e-05	8.19286e-05	SNCA
747	8.1479e-05	8.1479e-05	GALNT2
748	-8.08803e-05	8.08803e-05	SPHK2
749	8.06835e-05	8.06835e-05	HARS
750	8.05575e-05	8.05575e-05	ST6GALNAC6
751	-8.05134e-05	8.05134e-05	STK36
752	-8.02743e-05	8.02743e-05	HIST2H2BE
753	-8.00117e-05	8.00117e-05	ISCU
754	7.96447e-05	7.96447e-05	TFRC
755	7.94658e-05	7.94658e-05	NDUFA10
756	7.90415e-05	7.90415e-05	RUBCN
757	-7.90125e-05	7.90125e-05	HEY1
758	7.8817e-05	7.8817e-05	RCAN1
759	-7.85492e-05	7.85492e-05	PCDHB9
760	7.83991e-05	7.83991e-05	KLHL42
761	-7.80448e-05	7.80448e-05	CCDC88B
762	7.79765e-05	7.79765e-05	TALDO1
763	-7.76644e-05	7.76644e-05	SIK3
764	-7.75047e-05	7.75047e-05	ARGLU1
765	7.73361e-05	7.73361e-05	TSC22D1
766	-7.72259e-05	7.72259e-05	FAM171A1
767	7.72118e-05	7.72118e-05	C1QA
768	7.71566e-05	7.71566e-05	ZFR
769	7.6627e-05	7.6627e-05	GNPTG
770	7.64835e-05	7.64835e-05	NDRG3
771	-7.6424e-05	7.6424e-05	ANKLE1
772	-7.615e-05	7.615e-05	CCKBR
773	7.58827e-05	7.58827e-05	OPTN
774	7.56222e-05	7.56222e-05	PRELP
775	-7.54201e-05	7.54201e-05	HOPX
776	7.52247e-05	7.52247e-05	WDR34
777	7.51086e-05	7.51086e-05	LDOC1
778	-7.50497e-05	7.50497e-05	SOX10
779	7.50448e-05	7.50448e-05	ASPHD2
780	7.45515e-05	7.45515e-05	TKT
781	-7.44534e-05	7.44534e-05	PHYHIP
782	7.43099e-05	7.43099e-05	ALDH6A1
783	7.41729e-05	7.41729e-05	CCT7
784	-7.41688e-05	7.41688e-05	C1orf115
785	7.3476e-05	7.3476e-05	TMBIM4
786	-7.32014e-05	7.32014e-05	NPTN
787	-7.26332e-05	7.26332e-05	RPL27A
788	-7.24615e-05	7.24615e-05	ARPC5
789	7.23894e-05	7.23894e-05	ASPHD1
790	-7.21865e-05	7.21865e-05	RPRD1A
791	7.18663e-05	7.18663e-05	DUSP1
792	7.18238e-05	7.18238e-05	RAC1
793	-7.13276e-05	7.13276e-05	PBOV1
794	-7.12357e-05	7.12357e-05	NDUFB9
795	7.10879e-05	7.10879e-05	UBAC1
796	-7.10356e-05	7.10356e-05	RABGAP1
797	7.09797e-05	7.09797e-05	BAIAP3
798	7.09555e-05	7.09555e-05	HLA-B
799	-7.09341e-05	7.09341e-05	ATP5G1
800	7.09063e-05	7.09063e-05	ASRGL1
801	-7.08399e-05	7.08399e-05	FYN
802	-7.06629e-05	7.06629e-05	TUBB4B
803	7.05954e-05	7.05954e-05	SLC13A4
804	7.02367e-05	7.02367e-05	PTPN11
805	-7.01839e-05	7.01839e-05	OTUB1
806	7.01239e-05	7.01239e-05	PSMC3
807	-7.01104e-05	7.01104e-05	FAM217B
808	7.00909e-05	7.00909e-05	EFHD2
809	7.00571e-05	7.00571e-05	ALPL
810	-6.99761e-05	6.99761e-05	TPI1
811	-6.9656e-05	6.9656e-05	PSAP
812	6.9595e-05	6.9595e-05	PITPNM1
813	-6.95136e-05	6.95136e-05	PPIAL4A
814	6.94938e-05	6.94938e-05	GOLGA7
815	6.91537e-05	6.91537e-05	IRF9
816	-6.91102e-05	6.91102e-05	ROMO1
817	-6.88637e-05	6.88637e-05	HSPA6
818	-6.88525e-05	6.88525e-05	WDR82
819	-6.88246e-05	6.88246e-05	KLC1
820	6.84533e-05	6.84533e-05	AHSA2
821	-6.84302e-05	6.84302e-05	TNS3
822	6.83688e-05	6.83688e-05	S100A1
823	6.82903e-05	6.82903e-05	SPCS1
824	6.82561e-05	6.82561e-05	MYL6B
825	-6.82152e-05	6.82152e-05	PTPN4
826	-6.8166e-05	6.8166e-05	RAB40C
827	-6.8141e-05	6.8141e-05	SH2D5
828	-6.81359e-05	6.81359e-05	DCXR
829	-6.74841e-05	6.74841e-05	PDZD4
830	-6.74666e-05	6.74666e-05	DBT
831	-6.73537e-05	6.73537e-05	PRKCG
832	6.73059e-05	6.73059e-05	RASIP1
833	6.72233e-05	6.72233e-05	TPRG1L
834	6.69891e-05	6.69891e-05	POLK
835	-6.69887e-05	6.69887e-05	SCN1A
836	6.66511e-05	6.66511e-05	ZNF454
837	-6.64482e-05	6.64482e-05	PRRT2
838	-6.63151e-05	6.63151e-05	SHC3
839	-6.62409e-05	6.62409e-05	ERCC5
840	-6.59913e-05	6.59913e-05	EVL
841	6.56504e-05	6.56504e-05	KIFC3
842	-6.52924e-05	6.52924e-05	PARK7
843	6.51839e-05	6.51839e-05	MARCKSL1
844	-6.51033e-05	6.51033e-05	C10orf35
845	6.50778e-05	6.50778e-05	TNK2
846	6.50081e-05	6.50081e-05	UBA1
847	-6.49725e-05	6.49725e-05	VDAC3
848	6.48785e-05	6.48785e-05	ACO1
849	6.48281e-05	6.48281e-05	CAMKK2
850	6.4436e-05	6.4436e-05	TMEM256
851	-6.41983e-05	6.41983e-05	SCRN1
852	-6.40439e-05	6.40439e-05	CALM3
853	-6.40115e-05	6.40115e-05	NDRG4
854	6.40018e-05	6.40018e-05	TMEM51
855	6.39604e-05	6.39604e-05	ACSBG1
856	-6.39156e-05	6.39156e-05	METRN
857	6.38626e-05	6.38626e-05	SLCO2B1
858	-6.37982e-05	6.37982e-05	SNU13
859	6.37466e-05	6.37466e-05	GRAMD3
860	-6.3445e-05	6.3445e-05	TSPAN5
861	6.33969e-05	6.33969e-05	STK39
862	-6.30572e-05	6.30572e-05	SEC31A
863	-6.301e-05	6.301e-05	SLC22A23
864	6.29739e-05	6.29739e-05	NDP
865	6.22889e-05	6.22889e-05	NDUFA1
866	6.22313e-05	6.22313e-05	ATP1B3
867	-6.22233e-05	6.22233e-05	ZDHHC8
868	6.21008e-05	6.21008e-05	MAST1
869	-6.18566e-05	6.18566e-05	APLP1
870	6.16627e-05	6.16627e-05	SRI
871	6.16092e-05	6.16092e-05	EIF1B
872	6.15583e-05	6.15583e-05	MLF2
873	-6.1535e-05	6.1535e-05	PFN2
874	-6.14328e-05	6.14328e-05	ARNT2
875	6.11423e-05	6.11423e-05	NDRG1
876	-6.09554e-05	6.09554e-05	PNMA1
877	-6.09417e-05	6.09417e-05	TSPAN18
878	-6.0925e-05	6.0925e-05	RHOC
879	6.08687e-05	6.08687e-05	ZFYVE9
880	-6.07455e-05	6.07455e-05	NDUFB2
881	6.06982e-05	6.06982e-05	UBQLN2
882	6.06916e-05	6.06916e-05	KLF4
883	-6.05025e-05	6.05025e-05	CPNE6
884	-6.0389e-05	6.0389e-05	VAMP5
885	6.03795e-05	6.03795e-05	AGT
886	6.03592e-05	6.03592e-05	CYSTM1
887	6.03427e-05	6.03427e-05	MPC1
888	6.03131e-05	6.03131e-05	FAM120B
889	6.03024e-05	6.03024e-05	MLEC
890	-6.0283e-05	6.0283e-05	CSF1R
891	6.02369e-05	6.02369e-05	KPNA6
892	6.00704e-05	6.00704e-05	TTF2
893	6.00046e-05	6.00046e-05	SLC30A9
894	5.99082e-05	5.99082e-05	TNNT1
895	-5.9601e-05	5.9601e-05	PRNP
896	5.95328e-05	5.95328e-05	F3
897	5.95015e-05	5.95015e-05	RGS1
898	5.94826e-05	5.94826e-05	IGFBP6
899	5.93687e-05	5.93687e-05	ICAM5
900	-5.93448e-05	5.93448e-05	HSPA12A
901	-5.92608e-05	5.92608e-05	ACTG1
902	-5.9195e-05	5.9195e-05	MMD
903	-5.91648e-05	5.91648e-05	FNTA
904	-5.91591e-05	5.91591e-05	DDX5
905	-5.90873e-05	5.90873e-05	SLC1A4
906	-5.90465e-05	5.90465e-05	RYBP
907	-5.89857e-05	5.89857e-05	KLK7
908	5.89767e-05	5.89767e-05	RABEP1
909	5.87898e-05	5.87898e-05	EIF4G2
910	-5.86984e-05	5.86984e-05	SNX3
911	-5.8496e-05	5.8496e-05	GNG3
912	5.83188e-05	5.83188e-05	TRA2B
913	-5.82858e-05	5.82858e-05	GABARAPL1
914	5.81735e-05	5.81735e-05	APCDD1
915	5.80839e-05	5.80839e-05	RHOA
916	-5.80138e-05	5.80138e-05	IL17D
917	-5.79763e-05	5.79763e-05	RHOT2
918	5.79315e-05	5.79315e-05	NUBPL
919	5.79283e-05	5.79283e-05	STS
920	-5.79161e-05	5.79161e-05	PSMB10
921	5.79118e-05	5.79118e-05	MRPS6
922	5.78601e-05	5.78601e-05	WDR6
923	-5.78578e-05	5.78578e-05	DNAJA1
924	-5.76672e-05	5.76672e-05	TF
925	5.75555e-05	5.75555e-05	MAGED1
926	5.7378e-05	5.7378e-05	UBL5
927	5.73197e-05	5.73197e-05	RHEB
928	-5.73156e-05	5.73156e-05	NKAIN2
929	-5.7241e-05	5.7241e-05	SNAP25
930	-5.72246e-05	5.72246e-05	SGIP1
931	-5.72221e-05	5.72221e-05	RPP21
932	5.71239e-05	5.71239e-05	MAOB
933	-5.70965e-05	5.70965e-05	RAPGEF2
934	5.70098e-05	5.70098e-05	RAPGEFL1
935	-5.69942e-05	5.69942e-05	ADD3
936	-5.69717e-05	5.69717e-05	KBTBD6
937	-5.69539e-05	5.69539e-05	FAM131A
938	5.6936e-05	5.6936e-05	CMTM5
939	5.68467e-05	5.68467e-05	CXXC4
940	-5.67949e-05	5.67949e-05	AP1G2
941	-5.67745e-05	5.67745e-05	RPL6
942	-5.67133e-05	5.67133e-05	TOMM7
943	5.66394e-05	5.66394e-05	FADS2
944	5.64243e-05	5.64243e-05	KLHL3
945	-5.63338e-05	5.63338e-05	EFCAB14
946	5.62794e-05	5.62794e-05	OSBPL1A
947	5.6168e-05	5.6168e-05	BGN
948	-5.59917e-05	5.59917e-05	CCND3
949	5.59404e-05	5.59404e-05	MAP2K1
950	5.59055e-05	5.59055e-05	NLGN1
951	-5.59036e-05	5.59036e-05	NELL1
952	5.58315e-05	5.58315e-05	ZSCAN18
953	-5.57483e-05	5.57483e-05	ACTN1
954	-5.5459e-05	5.5459e-05	SRP72
955	5.52536e-05	5.52536e-05	RAB11A
956	-5.50374e-05	5.50374e-05	DNAL4
957	-5.50051e-05	5.50051e-05	EHBP1L1
958	-5.49084e-05	5.49084e-05	XIAP
959	-5.48903e-05	5.48903e-05	TRIM2
960	-5.45569e-05	5.45569e-05	P4HTM
961	5.44184e-05	5.44184e-05	PALLD
962	5.44123e-05	5.44123e-05	SORCS1
963	5.42511e-05	5.42511e-05	CNTN2
964	5.41789e-05	5.41789e-05	RERE
965	-5.41454e-05	5.41454e-05	GJA1
966	5.41136e-05	5.41136e-05	DENND3
967	-5.40807e-05	5.40807e-05	PPARGC1A
968	5.4076e-05	5.4076e-05	CD22
969	-5.40693e-05	5.40693e-05	ANKZF1
970	5.39833e-05	5.39833e-05	AK1
971	-5.38286e-05	5.38286e-05	GPRASP2
972	5.36893e-05	5.36893e-05	TOMM40L
973	5.34869e-05	5.34869e-05	UBE4A
974	5.34821e-05	5.34821e-05	BEND5
975	5.32792e-05	5.32792e-05	CD55
976	-5.32719e-05	5.32719e-05	SCOC
977	-5.30498e-05	5.30498e-05	TMEM19
978	-5.29165e-05	5.29165e-05	CDS1
979	5.28998e-05	5.28998e-05	C1QC
980	5.28672e-05	5.28672e-05	TBCA
981	-5.2665e-05	5.2665e-05	IFI27
982	-5.26243e-05	5.26243e-05	BEX5
983	5.25937e-05	5.25937e-05	CSRP2
984	5.22154e-05	5.22154e-05	ADRM1
985	-5.21638e-05	5.21638e-05	ANAPC11
986	-5.21437e-05	5.21437e-05	HNRNPH3
987	5.19657e-05	5.19657e-05	CYP4F3
988	5.19231e-05	5.19231e-05	EPN1
989	5.19222e-05	5.19222e-05	CYB5B
990	5.15999e-05	5.15999e-05	POLE4
991	5.14491e-05	5.14491e-05	KBTBD11
992	-5.14486e-05	5.14486e-05	PFN1
993	5.14413e-05	5.14413e-05	CYLD
994	-5.12946e-05	5.12946e-05	SH3YL1
995	-5.10943e-05	5.10943e-05	LRRC8A
996	-5.1032e-05	5.1032e-05	GATAD2A
997	5.09806e-05	5.09806e-05	DBF4
998	5.09538e-05	5.09538e-05	KCND2
999	-5.09389e-05	5.09389e-05	ERLEC1
1000	5.08677e-05	5.08677e-05	GLUD2
1001	-5.07724e-05	5.07724e-05	FXR1
1002	-5.06556e-05	5.06556e-05	TMEFF2
1003	-5.06421e-05	5.06421e-05	POLR2J
1004	5.06011e-05	5.06011e-05	HDAC4
1005	5.05474e-05	5.05474e-05	ZMAT3
1006	5.04122e-05	5.04122e-05	MAGED4B
1007	-5.03314e-05	5.03314e-05	EVI5
1008	-5.02442e-05	5.02442e-05	ITPK1
1009	-5.00416e-05	5.00416e-05	MTIF3
1010	-4.98222e-05	4.98222e-05	SPG21
1011	4.97935e-05	4.97935e-05	COASY
1012	-4.9779e-05	4.9779e-05	EFNB3
1013	-4.97449e-05	4.97449e-05	RPN2
1014	4.96505e-05	4.96505e-05	MACF1
1015	-4.96057e-05	4.96057e-05	IFI27L2
1016	-4.93678e-05	4.93678e-05	DCAF8
1017	4.93286e-05	4.93286e-05	TPD52L1
1018	-4.92917e-05	4.92917e-05	BCAP31
1019	4.92631e-05	4.92631e-05	ABLIM1
1020	-4.9212e-05	4.9212e-05	DGCR6L
1021	4.90549e-05	4.90549e-05	PAMR1
1022	4.90151e-05	4.90151e-05	RASL10B
1023	4.89511e-05	4.89511e-05	ITPKA
1024	-4.89446e-05	4.89446e-05	REEP1
1025	-4.89253e-05	4.89253e-05	MICAL2
1026	4.89207e-05	4.89207e-05	EGR4
1027	4.89166e-05	4.89166e-05	NMNAT1
1028	-4.8884e-05	4.8884e-05	PCDH19
1029	-4.8854e-05	4.8854e-05	VPS41
1030	-4.88249e-05	4.88249e-05	LRRC73
1031	4.8802e-05	4.8802e-05	TAP1
1032	4.87585e-05	4.87585e-05	ARHGEF12
1033	-4.87441e-05	4.87441e-05	MAP1LC3A
1034	4.8484e-05	4.8484e-05	RBBP7
1035	4.84567e-05	4.84567e-05	FAM13B
1036	-4.82452e-05	4.82452e-05	PDGFA
1037	-4.81847e-05	4.81847e-05	RPL13A
1038	4.80852e-05	4.80852e-05	CHPT1
1039	4.80812e-05	4.80812e-05	VHL
1040	-4.80664e-05	4.80664e-05	JMJD7-PLA2G4B
1041	4.79774e-05	4.79774e-05	RAD51B
1042	4.79105e-05	4.79105e-05	FAM134A
1043	4.77691e-05	4.77691e-05	PHIP
1044	4.76831e-05	4.76831e-05	SAFB2
1045	4.76302e-05	4.76302e-05	USE1
1046	-4.75568e-05	4.75568e-05	C19orf43
1047	4.75319e-05	4.75319e-05	SCGB2A2
1048	-4.75093e-05	4.75093e-05	NAB1
1049	-4.74876e-05	4.74876e-05	PLIN2
1050	4.74714e-05	4.74714e-05	MRPS21
1051	4.73564e-05	4.73564e-05	LINGO1
1052	-4.73502e-05	4.73502e-05	MPDZ
1053	-4.72225e-05	4.72225e-05	CRYM
1054	4.71861e-05	4.71861e-05	GADD45G
1055	-4.71805e-05	4.71805e-05	C1QB
1056	4.70029e-05	4.70029e-05	BCLAF1
1057	4.6954e-05	4.6954e-05	RPL15
1058	4.69243e-05	4.69243e-05	TPM4
1059	4.66945e-05	4.66945e-05	TP53INP2
1060	4.66104e-05	4.66104e-05	RAB5B
1061	4.65255e-05	4.65255e-05	MKRN1
1062	-4.6396e-05	4.6396e-05	COX5B
1063	4.63713e-05	4.63713e-05	TIMP3
1064	4.63582e-05	4.63582e-05	C11orf68
1065	4.63394e-05	4.63394e-05	PTPRN2
1066	-4.61289e-05	4.61289e-05	NFIA
1067	-4.60754e-05	4.60754e-05	GMFB
1068	-4.60294e-05	4.60294e-05	TRIP6
1069	4.60057e-05	4.60057e-05	RIDA
1070	-4.59896e-05	4.59896e-05	CTDSP2
1071	-4.59491e-05	4.59491e-05	TRO
1072	-4.58538e-05	4.58538e-05	RPL35A
1073	-4.57084e-05	4.57084e-05	NOP58
1074	-4.57001e-05	4.57001e-05	BBX
1075	4.56748e-05	4.56748e-05	GAD1
1076	-4.55244e-05	4.55244e-05	TBCB
1077	4.55125e-05	4.55125e-05	ATP6V1E1
1078	-4.5503e-05	4.5503e-05	RPS27A
1079	4.54921e-05	4.54921e-05	LAMP1
1080	4.52845e-05	4.52845e-05	FASN
1081	-4.526e-05	4.526e-05	PIH1D1
1082	-4.52595e-05	4.52595e-05	HBQ1
1083	4.52489e-05	4.52489e-05	XRCC5
1084	-4.51977e-05	4.51977e-05	CALB1
1085	4.51835e-05	4.51835e-05	ADAR
1086	4.51181e-05	4.51181e-05	FA2H
1087	4.50302e-05	4.50302e-05	HOMER1
1088	4.50147e-05	4.50147e-05	ERGIC3
1089	4.49483e-05	4.49483e-05	CEND1
1090	4.49476e-05	4.49476e-05	COL5A3
1091	4.48802e-05	4.48802e-05	GABARAPL2
1092	4.48598e-05	4.48598e-05	RSAD1
1093	-4.4699e-05	4.4699e-05	YY1
1094	4.46876e-05	4.46876e-05	RPS4Y1
1095	-4.46508e-05	4.46508e-05	GOLGA8A
1096	-4.45504e-05	4.45504e-05	ACTL6B
1097	-4.45317e-05	4.45317e-05	H2AFX
1098	4.43095e-05	4.43095e-05	ENPP6
1099	-4.4306e-05	4.4306e-05	MAPRE1
1100	4.42833e-05	4.42833e-05	GNG11
1101	4.4272e-05	4.4272e-05	TESC
1102	-4.42104e-05	4.42104e-05	LY6E
1103	4.41345e-05	4.41345e-05	CLIC4
1104	4.40868e-05	4.40868e-05	ITM2B
1105	4.40351e-05	4.40351e-05	NAT14
1106	4.39949e-05	4.39949e-05	HS3ST2
1107	4.39647e-05	4.39647e-05	AEBP1
1108	4.39557e-05	4.39557e-05	PPM1F
1109	-4.37557e-05	4.37557e-05	RPL13
1110	4.37458e-05	4.37458e-05	RGL1
1111	4.35266e-05	4.35266e-05	UBE2V1
1112	4.34808e-05	4.34808e-05	TRIP10
1113	-4.34407e-05	4.34407e-05	SRRM4
1114	4.32002e-05	4.32002e-05	NXPE2
1115	4.31669e-05	4.31669e-05	FPGS
1116	-4.30327e-05	4.30327e-05	PAPSS1
1117	4.3026e-05	4.3026e-05	MAP2K2
1118	-4.30173e-05	4.30173e-05	TMEM132A
1119	4.29474e-05	4.29474e-05	DDX1
1120	4.29039e-05	4.29039e-05	SCAMP4
1121	-4.28626e-05	4.28626e-05	NDUFS5
1122	4.28436e-05	4.28436e-05	FBXO21
1123	-4.28268e-05	4.28268e-05	YTHDC1
1124	4.2781e-05	4.2781e-05	SDHA
1125	4.27502e-05	4.27502e-05	WBSCR17
1126	-4.27478e-05	4.27478e-05	PDGFRB
1127	4.2745e-05	4.2745e-05	ZNF786
1128	-4.26666e-05	4.26666e-05	CUEDC1
1129	4.26431e-05	4.26431e-05	LETMD1
1130	4.26354e-05	4.26354e-05	LARGE1
1131	4.26259e-05	4.26259e-05	PSMC2
1132	4.26103e-05	4.26103e-05	PTCHD1
1133	4.25763e-05	4.25763e-05	TRA2A
1134	4.25554e-05	4.25554e-05	SNRNP25
1135	-4.25503e-05	4.25503e-05	DOHH
1136	-4.25458e-05	4.25458e-05	DENND4C
1137	4.25151e-05	4.25151e-05	TANC2
1138	4.25014e-05	4.25014e-05	SERPINB6
1139	-4.24635e-05	4.24635e-05	UROS
1140	4.23882e-05	4.23882e-05	NFIB
1141	-4.23668e-05	4.23668e-05	NPM1
1142	-4.21839e-05	4.21839e-05	VASP
1143	-4.21371e-05	4.21371e-05	RPS6KL1
1144	-4.21347e-05	4.21347e-05	KCNK12
1145	-4.2016e-05	4.2016e-05	CD24
1146	-4.20089e-05	4.20089e-05	C1QTNF4
1147	-4.20059e-05	4.20059e-05	KLHL2
1148	-4.1968e-05	4.1968e-05	CACNB4
1149	4.19546e-05	4.19546e-05	BTG2
1150	-4.19533e-05	4.19533e-05	GINM1
1151	-4.19464e-05	4.19464e-05	BLCAP
1152	-4.1945e-05	4.1945e-05	ADIPOR1
1153	4.19077e-05	4.19077e-05	STMN4
1154	4.17719e-05	4.17719e-05	EMD
1155	-4.17317e-05	4.17317e-05	FKBP3
1156	-4.1654e-05	4.1654e-05	RSAD2
1157	4.16144e-05	4.16144e-05	HLA-DMB
1158	4.15431e-05	4.15431e-05	DGKZ
1159	4.1512e-05	4.1512e-05	GPS1
1160	4.14306e-05	4.14306e-05	RAB31
1161	-4.13949e-05	4.13949e-05	PAQR4
1162	4.13581e-05	4.13581e-05	PEG10
1163	4.13518e-05	4.13518e-05	KHDRBS1
1164	-4.13156e-05	4.13156e-05	RPN1
1165	4.13128e-05	4.13128e-05	ZFHX2
1166	4.13111e-05	4.13111e-05	DNAJA2
1167	-4.12156e-05	4.12156e-05	RAB11FIP4
1168	4.12084e-05	4.12084e-05	ILK
1169	4.11512e-05	4.11512e-05	WSCD2
1170	4.11479e-05	4.11479e-05	FADS1
1171	-4.10239e-05	4.10239e-05	MSI1
1172	-4.09952e-05	4.09952e-05	DDR1
1173	-4.09735e-05	4.09735e-05	TROVE2
1174	4.09704e-05	4.09704e-05	ACER3
1175	-4.08104e-05	4.08104e-05	CD9
1176	4.06911e-05	4.06911e-05	GNPAT
1177	-4.06559e-05	4.06559e-05	PGM1
1178	-4.05692e-05	4.05692e-05	HLA-E
1179	-4.05564e-05	4.05564e-05	GPR37L1
1180	4.04344e-05	4.04344e-05	ATXN2
1181	-4.04105e-05	4.04105e-05	HNRNPM
1182	-4.04072e-05	4.04072e-05	TST
1183	-4.03799e-05	4.03799e-05	MRPL37
1184	4.03204e-05	4.03204e-05	SLIRP
1185	4.02783e-05	4.02783e-05	CLTC
1186	4.02548e-05	4.02548e-05	DDIT3
1187	4.02392e-05	4.02392e-05	WDR86
1188	4.01707e-05	4.01707e-05	PIK3IP1
1189	-4.00384e-05	4.00384e-05	NOMO1
1190	3.99669e-05	3.99669e-05	CDC14B
1191	3.99652e-05	3.99652e-05	TRAM1
1192	3.98397e-05	3.98397e-05	FXYD7
1193	-3.97969e-05	3.97969e-05	KCNF1
1194	3.97637e-05	3.97637e-05	EIF2S3
1195	-3.97229e-05	3.97229e-05	ANKRD9
1196	3.96893e-05	3.96893e-05	SLC35E2B
1197	3.96182e-05	3.96182e-05	SLC25A29
1198	3.95017e-05	3.95017e-05	CDK2AP2
1199	3.94935e-05	3.94935e-05	EPM2AIP1
1200	-3.94923e-05	3.94923e-05	HAPLN2
1201	-3.93517e-05	3.93517e-05	MORN4
1202	-3.93011e-05	3.93011e-05	CABLES1
1203	-3.92601e-05	3.92601e-05	KIFAP3
1204	-3.92322e-05	3.92322e-05	FOXO1
1205	-3.91852e-05	3.91852e-05	MPP2
1206	-3.91816e-05	3.91816e-05	BHLHE40
1207	3.91706e-05	3.91706e-05	DMRTC1
1208	3.91459e-05	3.91459e-05	CADM3
1209	3.90673e-05	3.90673e-05	CGNL1
1210	-3.89643e-05	3.89643e-05	KIAA0930
1211	3.89529e-05	3.89529e-05	FUS
1212	-3.88883e-05	3.88883e-05	CD99
1213	3.88785e-05	3.88785e-05	SMYD3
1214	-3.88146e-05	3.88146e-05	POU3F2
1215	3.88133e-05	3.88133e-05	KIF3B
1216	-3.87279e-05	3.87279e-05	ZDHHC22
1217	-3.86127e-05	3.86127e-05	SGK223
1218	-3.85937e-05	3.85937e-05	RNGTT
1219	3.85762e-05	3.85762e-05	GCA
1220	3.85582e-05	3.85582e-05	POLR2A
1221	-3.85479e-05	3.85479e-05	WDR54
1222	-3.83232e-05	3.83232e-05	CCDC92
1223	3.8289e-05	3.8289e-05	CTSB
1224	3.82736e-05	3.82736e-05	CAMK2B
1225	3.8255e-05	3.8255e-05	PLSCR4
1226	3.82388e-05	3.82388e-05	EFR3A
1227	-3.81885e-05	3.81885e-05	MESP1
1228	3.81597e-05	3.81597e-05	CLPTM1
1229	-3.80633e-05	3.80633e-05	PSMB6
1230	-3.8054e-05	3.8054e-05	POLH
1231	-3.80045e-05	3.80045e-05	NELFCD
1232	3.79831e-05	3.79831e-05	GOLGA3
1233	3.79824e-05	3.79824e-05	ARHGEF6
1234	3.79777e-05	3.79777e-05	CHD9
1235	3.79101e-05	3.79101e-05	CRBN
1236	-3.78735e-05	3.78735e-05	AP1S2
1237	3.78217e-05	3.78217e-05	PSRC1
1238	3.78052e-05	3.78052e-05	PICK1
1239	-3.77403e-05	3.77403e-05	DDX17
1240	3.77269e-05	3.77269e-05	MGST1
1241	-3.76922e-05	3.76922e-05	SUGT1
1242	-3.76617e-05	3.76617e-05	HLA-DPA1
1243	3.75107e-05	3.75107e-05	IFITM1
1244	-3.75065e-05	3.75065e-05	B4GAT1
1245	3.74349e-05	3.74349e-05	DYNLRB1
1246	3.73841e-05	3.73841e-05	FMC1
1247	-3.7373e-05	3.7373e-05	GATM
1248	-3.73363e-05	3.73363e-05	SEC16A
1249	-3.72888e-05	3.72888e-05	RHOG
1250	-3.71471e-05	3.71471e-05	SELO
1251	-3.71135e-05	3.71135e-05	ZNF430
1252	3.705e-05	3.705e-05	VDAC2
1253	3.69638e-05	3.69638e-05	ASXL3
1254	-3.68884e-05	3.68884e-05	RARS
1255	-3.68746e-05	3.68746e-05	WSB1
1256	-3.68728e-05	3.68728e-05	NDUFA12
1257	-3.68233e-05	3.68233e-05	MBOAT7
1258	-3.67732e-05	3.67732e-05	CPT1C
1259	-3.67312e-05	3.67312e-05	RSL24D1
1260	3.66845e-05	3.66845e-05	STAT2
1261	3.6671e-05	3.6671e-05	CA4
1262	3.66682e-05	3.66682e-05	TMCO1
1263	-3.66399e-05	3.66399e-05	ADORA3
1264	-3.66346e-05	3.66346e-05	DOC2A
1265	-3.65597e-05	3.65597e-05	IDO2
1266	3.64815e-05	3.64815e-05	YWHAB
1267	3.64217e-05	3.64217e-05	PCGF2
1268	3.64043e-05	3.64043e-05	ALDH5A1
1269	3.63989e-05	3.63989e-05	ACD
1270	-3.63799e-05	3.63799e-05	YJEFN3
1271	-3.62174e-05	3.62174e-05	SNCG
1272	3.61875e-05	3.61875e-05	TMEM47
1273	3.6165e-05	3.6165e-05	GYG1
1274	-3.61416e-05	3.61416e-05	ULK3
1275	3.60308e-05	3.60308e-05	XPNPEP1
1276	3.59911e-05	3.59911e-05	NTSR2
1277	3.59528e-05	3.59528e-05	MRPS23
1278	-3.59495e-05	3.59495e-05	ZC3H11A
1279	-3.59152e-05	3.59152e-05	ITGB5
1280	3.58464e-05	3.58464e-05	HMBOX1
1281	-3.57673e-05	3.57673e-05	RTN4
1282	3.57527e-05	3.57527e-05	UQCRFS1
1283	3.57448e-05	3.57448e-05	BACE1
1284	3.56846e-05	3.56846e-05	CARS
1285	3.56635e-05	3.56635e-05	WFS1
1286	-3.56393e-05	3.56393e-05	ANO3
1287	3.55698e-05	3.55698e-05	TCEB2
1288	3.55082e-05	3.55082e-05	CFL1
1289	3.54851e-05	3.54851e-05	DCTN1
1290	3.53968e-05	3.53968e-05	MBLAC1
1291	-3.53815e-05	3.53815e-05	ZDHHC23
1292	3.53441e-05	3.53441e-05	GSTK1
1293	-3.53273e-05	3.53273e-05	IQGAP1
1294	3.52774e-05	3.52774e-05	EHD1
1295	3.5247e-05	3.5247e-05	AKR1C3
1296	3.52077e-05	3.52077e-05	SLC25A37
1297	3.51663e-05	3.51663e-05	DMAP1
1298	3.51107e-05	3.51107e-05	RNF182
1299	3.50994e-05	3.50994e-05	C14orf166
1300	-3.50843e-05	3.50843e-05	ERH
1301	3.50333e-05	3.50333e-05	CARS2
1302	-3.49113e-05	3.49113e-05	AMOT
1303	-3.48988e-05	3.48988e-05	ESAM
1304	3.4846e-05	3.4846e-05	MRPS36
1305	3.47966e-05	3.47966e-05	TMSB15B
1306	3.47816e-05	3.47816e-05	IPO5
1307	3.4731e-05	3.4731e-05	RBP1
1308	3.46945e-05	3.46945e-05	BABAM1
1309	-3.45332e-05	3.45332e-05	HTR2A
1310	3.44979e-05	3.44979e-05	HSF4
1311	3.44653e-05	3.44653e-05	SMARCA4
1312	-3.44262e-05	3.44262e-05	ATP6V1G2
1313	-3.44083e-05	3.44083e-05	BEX3
1314	-3.43506e-05	3.43506e-05	HCFC1R1
1315	-3.42507e-05	3.42507e-05	HSD17B10
1316	3.42151e-05	3.42151e-05	SAR1A
1317	3.41914e-05	3.41914e-05	BLVRA
1318	-3.41706e-05	3.41706e-05	GSTP1
1319	3.39807e-05	3.39807e-05	POLR2M
1320	3.39566e-05	3.39566e-05	NDUFB7
1321	3.39307e-05	3.39307e-05	ARHGDIA
1322	3.39229e-05	3.39229e-05	AK4
1323	3.38873e-05	3.38873e-05	KCNH3
1324	-3.37451e-05	3.37451e-05	RAPGEF3
1325	-3.3739e-05	3.3739e-05	C1orf216
1326	-3.3734e-05	3.3734e-05	CADPS2
1327	-3.36553e-05	3.36553e-05	THOC7
1328	3.36405e-05	3.36405e-05	COQ8A
1329	-3.36196e-05	3.36196e-05	TMEM125
1330	3.36045e-05	3.36045e-05	SQSTM1
1331	3.35023e-05	3.35023e-05	NAPA
1332	-3.34763e-05	3.34763e-05	SH3GL3
1333	3.34123e-05	3.34123e-05	NOMO2
1334	-3.33974e-05	3.33974e-05	NINJ1
1335	-3.33855e-05	3.33855e-05	LGI3
1336	-3.33772e-05	3.33772e-05	SKIV2L
1337	3.33437e-05	3.33437e-05	TRIL
1338	-3.33186e-05	3.33186e-05	N4BP2L1
1339	3.32718e-05	3.32718e-05	AKR1B1
1340	-3.32691e-05	3.32691e-05	TXNDC12
1341	-3.32349e-05	3.32349e-05	COX11
1342	-3.32322e-05	3.32322e-05	APC2
1343	-3.322e-05	3.322e-05	AP3B2
1344	-3.31633e-05	3.31633e-05	NFIC
1345	3.30853e-05	3.30853e-05	LDLR
1346	-3.30818e-05	3.30818e-05	STIP1
1347	3.30791e-05	3.30791e-05	KIAA1191
1348	-3.28666e-05	3.28666e-05	SLC12A7
1349	-3.28549e-05	3.28549e-05	PTS
1350	3.28368e-05	3.28368e-05	MSN
1351	-3.28305e-05	3.28305e-05	EPRS
1352	3.28196e-05	3.28196e-05	CES4A
1353	-3.27984e-05	3.27984e-05	EIF5A2
1354	3.27328e-05	3.27328e-05	ZNF264
1355	-3.27153e-05	3.27153e-05	UBE2H
1356	3.26779e-05	3.26779e-05	TSPYL2
1357	-3.26631e-05	3.26631e-05	GARS
1358	-3.26586e-05	3.26586e-05	GPX3
1359	3.26021e-05	3.26021e-05	POMT1
1360	3.25743e-05	3.25743e-05	FAM110B
1361	-3.25666e-05	3.25666e-05	MFSD10
1362	3.25227e-05	3.25227e-05	SLC7A5
1363	3.25159e-05	3.25159e-05	RNF20
1364	3.24768e-05	3.24768e-05	YEATS2
1365	3.24586e-05	3.24586e-05	CWF19L2
1366	-3.23761e-05	3.23761e-05	PSMB5
1367	-3.23439e-05	3.23439e-05	F8A1
1368	3.23392e-05	3.23392e-05	ZNF577
1369	-3.23102e-05	3.23102e-05	NEDD8
1370	3.22992e-05	3.22992e-05	ALDH9A1
1371	3.22925e-05	3.22925e-05	LMAN2L
1372	3.22395e-05	3.22395e-05	BTBD10
1373	-3.21851e-05	3.21851e-05	NINL
1374	-3.21834e-05	3.21834e-05	APEH
1375	-3.21674e-05	3.21674e-05	SYNPR
1376	3.21057e-05	3.21057e-05	ROR1
1377	-3.20702e-05	3.20702e-05	CLTA
1378	-3.20237e-05	3.20237e-05	INTS3
1379	3.19596e-05	3.19596e-05	SELK
1380	-3.18834e-05	3.18834e-05	SGTA
1381	3.18497e-05	3.18497e-05	CTSA
1382	3.18186e-05	3.18186e-05	UBR4
1383	3.18046e-05	3.18046e-05	SSRP1
1384	3.17393e-05	3.17393e-05	HABP4
1385	-3.1698e-05	3.1698e-05	MAL2
1386	-3.16782e-05	3.16782e-05	ATP6V0B
1387	3.16687e-05	3.16687e-05	CD63
1388	3.16034e-05	3.16034e-05	SECISBP2L
1389	-3.15427e-05	3.15427e-05	TOMM20
1390	3.14612e-05	3.14612e-05	B3GALNT1
1391	-3.14285e-05	3.14285e-05	XPNPEP3
1392	3.14022e-05	3.14022e-05	PLCL2
1393	3.13426e-05	3.13426e-05	KRT19
1394	3.12942e-05	3.12942e-05	USP20
1395	-3.12273e-05	3.12273e-05	TMEM175
1396	3.11265e-05	3.11265e-05	PLOD1
1397	3.11106e-05	3.11106e-05	PRKAR2B
1398	3.11007e-05	3.11007e-05	KPTN
1399	3.09183e-05	3.09183e-05	PPP2R5B
1400	3.0887e-05	3.0887e-05	PPP1R3D
1401	3.08729e-05	3.08729e-05	FAHD1
1402	3.07681e-05	3.07681e-05	ARPC5L
1403	-3.07664e-05	3.07664e-05	NFAT5
1404	-3.07397e-05	3.07397e-05	FXYD1
1405	3.07076e-05	3.07076e-05	ADORA1
1406	3.07076e-05	3.07076e-05	CELF6
1407	-3.06815e-05	3.06815e-05	NUCB2
1408	-3.06619e-05	3.06619e-05	PLIN3
1409	3.06614e-05	3.06614e-05	AUTS2
1410	3.06456e-05	3.06456e-05	DLX1
1411	3.05778e-05	3.05778e-05	CC2D1A
1412	3.05636e-05	3.05636e-05	NBEA
1413	3.05601e-05	3.05601e-05	CHN1
1414	3.05329e-05	3.05329e-05	CPTP
1415	-3.05288e-05	3.05288e-05	RPS2
1416	3.04199e-05	3.04199e-05	NUB1
1417	-3.04189e-05	3.04189e-05	TSPAN9
1418	-3.04181e-05	3.04181e-05	FRG1
1419	3.03919e-05	3.03919e-05	FRZB
1420	3.02901e-05	3.02901e-05	SLC24A3
1421	-3.0283e-05	3.0283e-05	TARBP1
1422	3.02713e-05	3.02713e-05	TBC1D32
1423	-3.02652e-05	3.02652e-05	CAPN1
1424	-3.02629e-05	3.02629e-05	NRN1
1425	3.02622e-05	3.02622e-05	CIC
1426	3.02366e-05	3.02366e-05	BAG1
1427	-3.02083e-05	3.02083e-05	ERRFI1
1428	3.01995e-05	3.01995e-05	HDAC2
1429	3.01291e-05	3.01291e-05	PRCP
1430	-3.00778e-05	3.00778e-05	HNRNPD
1431	3.00219e-05	3.00219e-05	VEZF1
1432	2.99994e-05	2.99994e-05	STOM
1433	-2.99631e-05	2.99631e-05	COBL
1434	-2.99093e-05	2.99093e-05	ERMP1
1435	-2.99078e-05	2.99078e-05	VARS2
1436	2.98532e-05	2.98532e-05	USP4
1437	-2.98505e-05	2.98505e-05	CCM2
1438	2.97749e-05	2.97749e-05	PFDN5
1439	2.97404e-05	2.97404e-05	CHMP5
1440	-2.96633e-05	2.96633e-05	TXN
1441	-2.96046e-05	2.96046e-05	POMP
1442	2.95847e-05	2.95847e-05	CAB39
1443	2.95728e-05	2.95728e-05	VIP
1444	-2.95343e-05	2.95343e-05	TTYH2
1445	-2.94524e-05	2.94524e-05	FOXP1
1446	-2.93927e-05	2.93927e-05	CCR1
1447	-2.93686e-05	2.93686e-05	PAK6
1448	-2.93259e-05	2.93259e-05	RNF115
1449	2.93181e-05	2.93181e-05	FLOT2
1450	-2.92798e-05	2.92798e-05	C8orf46
1451	-2.92441e-05	2.92441e-05	COL6A1
1452	2.9238e-05	2.9238e-05	ROCK2
1453	2.92263e-05	2.92263e-05	BAG6
1454	2.92233e-05	2.92233e-05	SLC9A6
1455	2.91829e-05	2.91829e-05	CHMP1A
1456	-2.91654e-05	2.91654e-05	POLR2L
1457	2.91171e-05	2.91171e-05	ARHGEF3
1458	-2.90749e-05	2.90749e-05	SPATA2L
1459	-2.90583e-05	2.90583e-05	PUM1
1460	2.90146e-05	2.90146e-05	PTPA
1461	2.90134e-05	2.90134e-05	PDE1A
1462	2.90124e-05	2.90124e-05	SC5D
1463	2.89685e-05	2.89685e-05	TXN2
1464	2.8966e-05	2.8966e-05	MOAP1
1465	-2.89597e-05	2.89597e-05	SLC5A3
1466	2.89486e-05	2.89486e-05	RPS16
1467	2.89425e-05	2.89425e-05	BMS1
1468	2.89162e-05	2.89162e-05	USP14
1469	2.88976e-05	2.88976e-05	SLC6A12
1470	2.88393e-05	2.88393e-05	TCEAL8
1471	2.88335e-05	2.88335e-05	IFIT2
1472	-2.88209e-05	2.88209e-05	GSN
1473	2.87926e-05	2.87926e-05	ADGRL1
1474	2.87861e-05	2.87861e-05	ALOX5AP
1475	-2.8741e-05	2.8741e-05	TMEM144
1476	2.87348e-05	2.87348e-05	RBM25
1477	-2.87293e-05	2.87293e-05	SLITRK2
1478	2.87286e-05	2.87286e-05	PPP4R1
1479	2.86616e-05	2.86616e-05	ACO2
1480	2.86481e-05	2.86481e-05	FAM19A5
1481	-2.85685e-05	2.85685e-05	NUDT14
1482	-2.84658e-05	2.84658e-05	CRY2
1483	-2.84457e-05	2.84457e-05	DAD1
1484	2.8433e-05	2.8433e-05	GNPNAT1
1485	2.84009e-05	2.84009e-05	ACAT1
1486	-2.83799e-05	2.83799e-05	WBP2
1487	-2.83601e-05	2.83601e-05	MYO10
1488	-2.83076e-05	2.83076e-05	GABBR2
1489	-2.82919e-05	2.82919e-05	FAM167A
1490	2.82608e-05	2.82608e-05	ARHGAP33
1491	2.82573e-05	2.82573e-05	HSPD1
1492	-2.82421e-05	2.82421e-05	ABCB7
1493	-2.82295e-05	2.82295e-05	PHACTR1
1494	2.81971e-05	2.81971e-05	C2orf40
1495	2.81105e-05	2.81105e-05	MUM1
1496	2.80563e-05	2.80563e-05	DOK4
1497	2.80209e-05	2.80209e-05	STAMBPL1
1498	-2.8016e-05	2.8016e-05	UBE2R2
1499	2.79746e-05	2.79746e-05	ASAP3
1500	-2.79479e-05	2.79479e-05	ME3
1501	2.79437e-05	2.79437e-05	MMS19
1502	-2.79352e-05	2.79352e-05	NKX2-2
1503	-2.79292e-05	2.79292e-05	TNFRSF1A
1504	2.79141e-05	2.79141e-05	VPS37B
1505	2.78849e-05	2.78849e-05	DLG5
1506	2.78255e-05	2.78255e-05	ATRX
1507	2.78116e-05	2.78116e-05	AKR7A2
1508	2.77751e-05	2.77751e-05	MRPL20
1509	-2.77513e-05	2.77513e-05	ENHO
1510	-2.7697e-05	2.7697e-05	ARHGAP1
1511	2.76944e-05	2.76944e-05	TSPAN7
1512	-2.76148e-05	2.76148e-05	SLC20A1
1513	2.75783e-05	2.75783e-05	SDR39U1
1514	2.75391e-05	2.75391e-05	GPX4
1515	-2.75229e-05	2.75229e-05	PBXIP1
1516	2.7507e-05	2.7507e-05	TUFM
1517	-2.74944e-05	2.74944e-05	ASCC2
1518	2.74919e-05	2.74919e-05	ASB8
1519	-2.74572e-05	2.74572e-05	ATP6V0E1
1520	-2.7436e-05	2.7436e-05	HES4
1521	2.74118e-05	2.74118e-05	ATF7IP2
1522	2.7403e-05	2.7403e-05	CS
1523	2.73782e-05	2.73782e-05	SLC9A1
1524	2.73051e-05	2.73051e-05	CNN3
1525	-2.72666e-05	2.72666e-05	ATXN10
1526	2.72619e-05	2.72619e-05	HLA-C
1527	-2.7224e-05	2.7224e-05	PITHD1
1528	2.71798e-05	2.71798e-05	ALDH1A1
1529	2.71417e-05	2.71417e-05	ESYT1
1530	-2.71178e-05	2.71178e-05	SYNGR3
1531	-2.70897e-05	2.70897e-05	AMZ2
1532	2.70113e-05	2.70113e-05	ABHD16A
1533	-2.70011e-05	2.70011e-05	PLPPR3
1534	2.69826e-05	2.69826e-05	GLT1D1
1535	-2.69756e-05	2.69756e-05	CAST
1536	2.69722e-05	2.69722e-05	COX14
1537	2.69329e-05	2.69329e-05	GLRB
1538	2.69318e-05	2.69318e-05	TMEM245
1539	2.69099e-05	2.69099e-05	CLNS1A
1540	-2.69053e-05	2.69053e-05	DNAAF5
1541	2.68447e-05	2.68447e-05	ABCA2
1542	2.68241e-05	2.68241e-05	PAG1
1543	-2.68165e-05	2.68165e-05	KIAA1109
1544	2.6805e-05	2.6805e-05	LHX6
1545	2.67478e-05	2.67478e-05	CNRIP1
1546	2.67452e-05	2.67452e-05	EXOC6B
1547	2.67444e-05	2.67444e-05	HEXB
1548	2.67439e-05	2.67439e-05	DPF3
1549	-2.67423e-05	2.67423e-05	ATP5G3
1550	-2.67059e-05	2.67059e-05	SUGP2
1551	-2.66928e-05	2.66928e-05	GPR155
1552	2.66846e-05	2.66846e-05	LRIG1
1553	2.66786e-05	2.66786e-05	C19orf12
1554	2.66547e-05	2.66547e-05	ADAD2
1555	-2.66186e-05	2.66186e-05	ARPP21
1556	-2.66127e-05	2.66127e-05	PDHB
1557	-2.65664e-05	2.65664e-05	PHF21A
1558	2.65064e-05	2.65064e-05	MAST2
1559	2.64205e-05	2.64205e-05	EIF1AX
1560	2.64064e-05	2.64064e-05	CLK1
1561	2.6344e-05	2.6344e-05	GTF3A
1562	2.63256e-05	2.63256e-05	MAPRE3
1563	-2.63106e-05	2.63106e-05	DBI
1564	2.6281e-05	2.6281e-05	IGFBP3
1565	-2.62605e-05	2.62605e-05	ARL8B
1566	-2.62381e-05	2.62381e-05	UAP1
1567	2.6194e-05	2.6194e-05	TRAPPC6B
1568	-2.61708e-05	2.61708e-05	MORN1
1569	2.61648e-05	2.61648e-05	LMBRD1
1570	2.61357e-05	2.61357e-05	PAQR8
1571	-2.61205e-05	2.61205e-05	MAP3K5
1572	-2.60949e-05	2.60949e-05	CYTH1
1573	2.60938e-05	2.60938e-05	LANCL1
1574	2.60843e-05	2.60843e-05	LTF
1575	-2.60677e-05	2.60677e-05	ANP32B
1576	2.60338e-05	2.60338e-05	C11orf1
1577	2.59747e-05	2.59747e-05	LAYN
1578	2.59716e-05	2.59716e-05	DNAJA4
1579	-2.59012e-05	2.59012e-05	LRRC8D
1580	2.58976e-05	2.58976e-05	NOL4
1581	2.58914e-05	2.58914e-05	IFNGR1
1582	2.58198e-05	2.58198e-05	PALM
1583	2.58142e-05	2.58142e-05	PIAS4
1584	-2.57707e-05	2.57707e-05	TIMM21
1585	-2.57535e-05	2.57535e-05	ZMIZ1
1586	2.57091e-05	2.57091e-05	TCEB1
1587	-2.56577e-05	2.56577e-05	COG1
1588	2.56163e-05	2.56163e-05	VAT1L
1589	2.55994e-05	2.55994e-05	VOPP1
1590	-2.55559e-05	2.55559e-05	SUB1
1591	-2.55317e-05	2.55317e-05	CMC2
1592	-2.5517e-05	2.5517e-05	NR2F2
1593	2.55161e-05	2.55161e-05	GARNL3
1594	2.54963e-05	2.54963e-05	SERTAD1
1595	-2.54859e-05	2.54859e-05	TLR2
1596	2.54533e-05	2.54533e-05	NCKIPSD
1597	-2.53884e-05	2.53884e-05	NCAN
1598	-2.53811e-05	2.53811e-05	PRRT1
1599	-2.53681e-05	2.53681e-05	ERO1A
1600	2.53408e-05	2.53408e-05	CADM1
1601	2.53199e-05	2.53199e-05	CDK5R1
1602	2.53145e-05	2.53145e-05	NPC1
1603	2.5275e-05	2.5275e-05	IST1
1604	2.52596e-05	2.52596e-05	ADH5
1605	-2.52545e-05	2.52545e-05	CD59
1606	-2.52489e-05	2.52489e-05	TJP1
1607	2.52297e-05	2.52297e-05	NOS1AP
1608	2.51866e-05	2.51866e-05	RAN
1609	2.51672e-05	2.51672e-05	SH3BGRL
1610	-2.50866e-05	2.50866e-05	ATP6V1H
1611	2.50684e-05	2.50684e-05	TMEM98
1612	-2.50673e-05	2.50673e-05	MYH10
1613	-2.49668e-05	2.49668e-05	RNF113A
1614	2.49572e-05	2.49572e-05	XAB2
1615	-2.49202e-05	2.49202e-05	CYP2J2
1616	2.4919e-05	2.4919e-05	PHF21B
1617	2.48595e-05	2.48595e-05	CEPT1
1618	2.47865e-05	2.47865e-05	DUSP8
1619	2.4782e-05	2.4782e-05	FHL1
1620	2.47502e-05	2.47502e-05	ANGEL2
1621	-2.47306e-05	2.47306e-05	SS18L2
1622	2.46949e-05	2.46949e-05	CKAP5
1623	-2.46247e-05	2.46247e-05	CYFIP2
1624	2.46056e-05	2.46056e-05	FLRT3
1625	2.45906e-05	2.45906e-05	RBM15
1626	2.45548e-05	2.45548e-05	PAK3
1627	-2.45486e-05	2.45486e-05	TTC14
1628	2.44914e-05	2.44914e-05	ACTR10
1629	-2.44184e-05	2.44184e-05	AGAP4
1630	-2.44102e-05	2.44102e-05	RPS13
1631	-2.43948e-05	2.43948e-05	HBG1
1632	2.43708e-05	2.43708e-05	MMP17
1633	2.43666e-05	2.43666e-05	NAGPA
1634	2.43616e-05	2.43616e-05	CYB5R2
1635	2.43543e-05	2.43543e-05	GNPDA1
1636	-2.43404e-05	2.43404e-05	RGPD4
1637	2.43172e-05	2.43172e-05	SRM
1638	2.43066e-05	2.43066e-05	TSSC1
1639	-2.42902e-05	2.42902e-05	TJAP1
1640	2.42756e-05	2.42756e-05	N4BP1
1641	-2.42707e-05	2.42707e-05	CTGF
1642	-2.42703e-05	2.42703e-05	NR1H2
1643	2.42571e-05	2.42571e-05	CABIN1
1644	-2.42055e-05	2.42055e-05	POMGNT1
1645	2.42031e-05	2.42031e-05	ROGDI
1646	2.41782e-05	2.41782e-05	NOTCH1
1647	-2.41311e-05	2.41311e-05	PDCD7
1648	-2.41122e-05	2.41122e-05	STK35
1649	2.41082e-05	2.41082e-05	SH3BGRL2
1650	2.41009e-05	2.41009e-05	RPL29
1651	-2.41005e-05	2.41005e-05	MAP3K12
1652	2.40322e-05	2.40322e-05	C16orf45
1653	2.4019e-05	2.4019e-05	LSM12
1654	-2.39133e-05	2.39133e-05	GOT1
1655	-2.39115e-05	2.39115e-05	RBM12
1656	-2.38813e-05	2.38813e-05	GOT2
1657	-2.38326e-05	2.38326e-05	TSPAN33
1658	2.3821e-05	2.3821e-05	PRICKLE4
1659	2.38106e-05	2.38106e-05	EIF4EBP2
1660	-2.37738e-05	2.37738e-05	TMEM55B
1661	2.37708e-05	2.37708e-05	SNAP91
1662	-2.37666e-05	2.37666e-05	JAKMIP1
1663	-2.37653e-05	2.37653e-05	JARID2
1664	-2.3722e-05	2.3722e-05	ATP6V0D1
1665	2.37172e-05	2.37172e-05	ZYG11B
1666	-2.37123e-05	2.37123e-05	ETFB
1667	2.37034e-05	2.37034e-05	CRH
1668	-2.36244e-05	2.36244e-05	MYT1
1669	-2.36234e-05	2.36234e-05	RALGPS1
1670	-2.35828e-05	2.35828e-05	CAPN3
1671	2.35729e-05	2.35729e-05	GALC
1672	-2.35497e-05	2.35497e-05	RNF112
1673	-2.35488e-05	2.35488e-05	MYH9
1674	2.35319e-05	2.35319e-05	RNF24
1675	2.35303e-05	2.35303e-05	NKAIN4
1676	2.35113e-05	2.35113e-05	HAVCR2
1677	2.35069e-05	2.35069e-05	APBB1
1678	-2.34749e-05	2.34749e-05	DENND5A
1679	2.34591e-05	2.34591e-05	YPEL4
1680	-2.3458e-05	2.3458e-05	FAM133A
1681	-2.3458e-05	2.3458e-05	DNAJB6
1682	2.34459e-05	2.34459e-05	SLF2
1683	2.34455e-05	2.34455e-05	DLD
1684	2.34284e-05	2.34284e-05	CRKL
1685	2.33976e-05	2.33976e-05	EXTL3
1686	2.33755e-05	2.33755e-05	PHACTR3
1687	-2.33618e-05	2.33618e-05	NAP1L3
1688	2.33234e-05	2.33234e-05	HCLS1
1689	2.32825e-05	2.32825e-05	GRB2
1690	2.3282e-05	2.3282e-05	ISYNA1
1691	-2.32411e-05	2.32411e-05	ASS1
1692	2.32271e-05	2.32271e-05	PTH1R
1693	2.3187e-05	2.3187e-05	PDYN
1694	-2.31423e-05	2.31423e-05	ATOH8
1695	2.31283e-05	2.31283e-05	ID2
1696	-2.30319e-05	2.30319e-05	SOX18
1697	-2.3015e-05	2.3015e-05	SDC4
1698	-2.29727e-05	2.29727e-05	TBC1D14
1699	-2.29718e-05	2.29718e-05	ATG101
1700	-2.29525e-05	2.29525e-05	PRKCZ
1701	2.29267e-05	2.29267e-05	CARTPT
1702	-2.29137e-05	2.29137e-05	FAM198B
1703	-2.28918e-05	2.28918e-05	TAX1BP1
1704	-2.28752e-05	2.28752e-05	ZNF148
1705	2.28574e-05	2.28574e-05	RNF130
1706	-2.28356e-05	2.28356e-05	GLTP
1707	2.28029e-05	2.28029e-05	COQ10B
1708	-2.27742e-05	2.27742e-05	NRXN3
1709	2.27622e-05	2.27622e-05	PRPF31
1710	2.27607e-05	2.27607e-05	CYBA
1711	-2.27172e-05	2.27172e-05	KHSRP
1712	2.27032e-05	2.27032e-05	NBL1
1713	-2.27011e-05	2.27011e-05	PPT1
1714	-2.26654e-05	2.26654e-05	ZNF664
1715	2.26443e-05	2.26443e-05	FGF12
1716	2.26291e-05	2.26291e-05	PMP22
1717	-2.26158e-05	2.26158e-05	DDIT4L
1718	-2.26116e-05	2.26116e-05	PCMT1
1719	-2.26003e-05	2.26003e-05	ZCCHC17
1720	-2.25471e-05	2.25471e-05	NADK
1721	2.24639e-05	2.24639e-05	MZT2B
1722	-2.24373e-05	2.24373e-05	RABAC1
1723	-2.24349e-05	2.24349e-05	ZNF136
1724	-2.24218e-05	2.24218e-05	EAPP
1725	2.24188e-05	2.24188e-05	PRMT2
1726	2.24181e-05	2.24181e-05	FDFT1
1727	-2.2415e-05	2.2415e-05	SLAIN1
1728	2.24086e-05	2.24086e-05	RNF149
1729	-2.24073e-05	2.24073e-05	FAM134B
1730	2.23876e-05	2.23876e-05	EDC3
1731	2.23824e-05	2.23824e-05	NDEL1
1732	-2.23441e-05	2.23441e-05	COLGALT2
1733	-2.23425e-05	2.23425e-05	RASA3
1734	2.23366e-05	2.23366e-05	CTSZ
1735	-2.23074e-05	2.23074e-05	DERA
1736	-2.22889e-05	2.22889e-05	CXADR
1737	2.22881e-05	2.22881e-05	HLF
1738	-2.22741e-05	2.22741e-05	ZSCAN31
1739	-2.22699e-05	2.22699e-05	SRSF9
1740	2.22681e-05	2.22681e-05	TMEM219
1741	2.22578e-05	2.22578e-05	KLF2
1742	2.2256e-05	2.2256e-05	TGFBR3
1743	2.22533e-05	2.22533e-05	C1orf54
1744	-2.22396e-05	2.22396e-05	HNRNPA1
1745	-2.22366e-05	2.22366e-05	AKIRIN1
1746	-2.22003e-05	2.22003e-05	D2HGDH
1747	-2.21994e-05	2.21994e-05	NDUFS3
1748	-2.21853e-05	2.21853e-05	MRPL24
1749	-2.21757e-05	2.21757e-05	TM2D3
1750	2.21736e-05	2.21736e-05	PEF1
1751	-2.21675e-05	2.21675e-05	MUM1L1
1752	-2.21501e-05	2.21501e-05	SEC14L2
1753	2.21134e-05	2.21134e-05	GLDN
1754	2.20863e-05	2.20863e-05	BEST1
1755	2.20827e-05	2.20827e-05	SLC35E1
1756	2.20806e-05	2.20806e-05	NFKBIA
1757	2.20802e-05	2.20802e-05	TAPT1
1758	2.20798e-05	2.20798e-05	IFT88
1759	-2.20774e-05	2.20774e-05	CYP27A1
1760	-2.20575e-05	2.20575e-05	GAB2
1761	-2.20386e-05	2.20386e-05	C1orf64
1762	-2.20245e-05	2.20245e-05	GPKOW
1763	2.19968e-05	2.19968e-05	SNAPC4
1764	2.19963e-05	2.19963e-05	GUCY1B3
1765	2.19887e-05	2.19887e-05	HDAC1
1766	2.19796e-05	2.19796e-05	SH2D2A
1767	2.19787e-05	2.19787e-05	NPEPPS
1768	2.1977e-05	2.1977e-05	PSMD4
1769	2.19484e-05	2.19484e-05	THBS4
1770	2.19352e-05	2.19352e-05	MYL6
1771	-2.19285e-05	2.19285e-05	ANK3
1772	-2.18994e-05	2.18994e-05	MX1
1773	-2.18717e-05	2.18717e-05	WWP1
1774	2.18682e-05	2.18682e-05	PDE6H
1775	2.18667e-05	2.18667e-05	RAB9B
1776	2.18502e-05	2.18502e-05	HENMT1
1777	2.1825e-05	2.1825e-05	FUT1
1778	-2.17824e-05	2.17824e-05	GCSH
1779	-2.17182e-05	2.17182e-05	PEPD
1780	2.17157e-05	2.17157e-05	RPL39
1781	-2.16817e-05	2.16817e-05	SEPP1
1782	-2.16777e-05	2.16777e-05	DYNLT3
1783	-2.16637e-05	2.16637e-05	BCL2L2
1784	-2.16569e-05	2.16569e-05	GPI
1785	-2.1637e-05	2.1637e-05	ADCY3
1786	-2.16315e-05	2.16315e-05	SCHIP1
1787	-2.16174e-05	2.16174e-05	ECH1
1788	2.15971e-05	2.15971e-05	EPHB6
1789	2.1588e-05	2.1588e-05	UBE2J1
1790	2.15863e-05	2.15863e-05	KDM4B
1791	2.15862e-05	2.15862e-05	GSTA4
1792	-2.15837e-05	2.15837e-05	CA8
1793	-2.1559e-05	2.1559e-05	RPS19BP1
1794	-2.15339e-05	2.15339e-05	POMGNT2
1795	-2.15324e-05	2.15324e-05	PDIA3
1796	2.15089e-05	2.15089e-05	TAF1C
1797	-2.14911e-05	2.14911e-05	SAT2
1798	-2.14785e-05	2.14785e-05	FRMD8
1799	-2.14523e-05	2.14523e-05	MLC1
1800	2.14484e-05	2.14484e-05	MAP7D1
1801	2.14478e-05	2.14478e-05	ANAPC5
1802	2.14372e-05	2.14372e-05	ADAMTS18
1803	2.14364e-05	2.14364e-05	ELMOD1
1804	2.14295e-05	2.14295e-05	GNB3
1805	2.13566e-05	2.13566e-05	INSIG1
1806	2.13414e-05	2.13414e-05	GPC5
1807	2.13314e-05	2.13314e-05	WSCD1
1808	-2.13111e-05	2.13111e-05	CDC5L
1809	-2.12945e-05	2.12945e-05	RYR2
1810	2.12892e-05	2.12892e-05	ELOVL7
1811	2.12881e-05	2.12881e-05	TLE2
1812	2.12827e-05	2.12827e-05	PDDC1
1813	2.12793e-05	2.12793e-05	EIF2B4
1814	-2.12663e-05	2.12663e-05	FAM49B
1815	2.12467e-05	2.12467e-05	WIPF2
1816	-2.12235e-05	2.12235e-05	DDOST
1817	-2.12186e-05	2.12186e-05	CDH10
1818	2.12151e-05	2.12151e-05	VPS9D1
1819	2.11594e-05	2.11594e-05	HYI
1820	-2.11277e-05	2.11277e-05	ABHD14A
1821	-2.10955e-05	2.10955e-05	MEGF10
1822	2.10684e-05	2.10684e-05	RALYL
1823	-2.10656e-05	2.10656e-05	NRCAM
1824	2.10392e-05	2.10392e-05	NMRAL1
1825	2.10282e-05	2.10282e-05	CSF3
1826	2.10005e-05	2.10005e-05	RBPJ
1827	-2.0991e-05	2.0991e-05	BIRC3
1828	2.09556e-05	2.09556e-05	SLC5A7
1829	-2.08988e-05	2.08988e-05	RBM14
1830	-2.08936e-05	2.08936e-05	BCL6
1831	-2.0891e-05	2.0891e-05	SLC17A7
1832	2.08821e-05	2.08821e-05	MYL12B
1833	2.07868e-05	2.07868e-05	ZNF444
1834	-2.07862e-05	2.07862e-05	SCAMP5
1835	-2.0775e-05	2.0775e-05	SH3GLB2
1836	-2.07382e-05	2.07382e-05	LRRFIP1
1837	2.07338e-05	2.07338e-05	GJB1
1838	-2.06987e-05	2.06987e-05	ATP6AP2
1839	2.06471e-05	2.06471e-05	TNFRSF11B
1840	-2.06225e-05	2.06225e-05	C1orf43
1841	2.06192e-05	2.06192e-05	COMMD7
1842	2.06144e-05	2.06144e-05	FURIN
1843	2.05928e-05	2.05928e-05	PODXL2
1844	-2.05906e-05	2.05906e-05	LMO2
1845	-2.05891e-05	2.05891e-05	SPEN
1846	-2.05787e-05	2.05787e-05	NDE1
1847	2.05714e-05	2.05714e-05	EDF1
1848	-2.04838e-05	2.04838e-05	ANXA1
1849	2.04097e-05	2.04097e-05	DUSP5
1850	-2.04058e-05	2.04058e-05	SORL1
1851	2.03841e-05	2.03841e-05	SMPD4
1852	2.03371e-05	2.03371e-05	CHRM3
1853	-2.03163e-05	2.03163e-05	ITPR1
1854	-2.03107e-05	2.03107e-05	IFT74
1855	-2.02784e-05	2.02784e-05	CLDN10
1856	-2.02646e-05	2.02646e-05	CASP8AP2
1857	-2.02601e-05	2.02601e-05	SLC8A2
1858	-2.026e-05	2.026e-05	CCDC85A
1859	-2.02523e-05	2.02523e-05	IGFBP7
1860	2.0223e-05	2.0223e-05	APOC1
1861	2.02196e-05	2.02196e-05	CNTNAP2
1862	-2.02045e-05	2.02045e-05	DAP
1863	-2.02018e-05	2.02018e-05	LPCAT4
1864	-2.01751e-05	2.01751e-05	SF1
1865	2.01723e-05	2.01723e-05	ZC3H15
1866	2.01401e-05	2.01401e-05	SRPRB
1867	2.0136e-05	2.0136e-05	NCOR2
1868	-2.00921e-05	2.00921e-05	PHF5A
1869	2.00918e-05	2.00918e-05	H3F3B
1870	-2.00856e-05	2.00856e-05	MDH1
1871	2.00686e-05	2.00686e-05	BSDC1
1872	2.00511e-05	2.00511e-05	ATP2A2
1873	-2.00325e-05	2.00325e-05	ALPP
1874	-1.99665e-05	1.99665e-05	MUT
1875	1.99392e-05	1.99392e-05	LRFN3
1876	-1.99213e-05	1.99213e-05	ARF1
1877	1.99161e-05	1.99161e-05	POLR2I
1878	-1.99057e-05	1.99057e-05	RWDD1
1879	1.9847e-05	1.9847e-05	MOXD1
1880	-1.98281e-05	1.98281e-05	CDK18
1881	1.98228e-05	1.98228e-05	TCEAL7
1882	-1.98206e-05	1.98206e-05	PIN1
1883	1.98179e-05	1.98179e-05	FBXL5
1884	1.98108e-05	1.98108e-05	RAB5A
1885	1.97563e-05	1.97563e-05	CAP2
1886	1.97492e-05	1.97492e-05	ZNF622
1887	-1.97445e-05	1.97445e-05	KCNJ10
1888	1.97363e-05	1.97363e-05	CDH2
1889	-1.97229e-05	1.97229e-05	SLC25A6
1890	-1.97177e-05	1.97177e-05	DCTN2
1891	-1.97081e-05	1.97081e-05	KLK6
1892	-1.97044e-05	1.97044e-05	CITED4
1893	1.96947e-05	1.96947e-05	CMTR1
1894	1.96848e-05	1.96848e-05	ACADM
1895	1.9666e-05	1.9666e-05	C9orf16
1896	1.96624e-05	1.96624e-05	SLC4A3
1897	1.96353e-05	1.96353e-05	RBFOX2
1898	1.96271e-05	1.96271e-05	ASIC1
1899	1.96266e-05	1.96266e-05	MAN2C1
1900	-1.96132e-05	1.96132e-05	KPNB1
1901	-1.95873e-05	1.95873e-05	G3BP1
1902	1.95451e-05	1.95451e-05	GLI4
1903	1.95274e-05	1.95274e-05	NSA2
1904	-1.95065e-05	1.95065e-05	GRHPR
1905	1.95024e-05	1.95024e-05	NAPRT
1906	1.94927e-05	1.94927e-05	HILPDA
1907	1.9491e-05	1.9491e-05	IL17RB
1908	1.94892e-05	1.94892e-05	PNKD
1909	-1.94889e-05	1.94889e-05	ARHGEF9
1910	1.94879e-05	1.94879e-05	SRSF1
1911	1.94636e-05	1.94636e-05	TUBB4A
1912	-1.94604e-05	1.94604e-05	ARID4B
1913	1.94536e-05	1.94536e-05	COPRS
1914	-1.94455e-05	1.94455e-05	GOSR1
1915	-1.94212e-05	1.94212e-05	RPL17
1916	-1.94051e-05	1.94051e-05	AGTRAP
1917	1.9374e-05	1.9374e-05	CIB1
1918	1.93575e-05	1.93575e-05	CUTA
1919	1.93457e-05	1.93457e-05	ARF4
1920	1.93082e-05	1.93082e-05	MED25
1921	1.93049e-05	1.93049e-05	C2CD4C
1922	1.92988e-05	1.92988e-05	SDHD
1923	1.9259e-05	1.9259e-05	MICU1
1924	-1.92575e-05	1.92575e-05	MATR3
1925	1.92475e-05	1.92475e-05	GANAB
1926	1.92399e-05	1.92399e-05	GMNN
1927	1.92073e-05	1.92073e-05	MXRA7
1928	-1.91965e-05	1.91965e-05	PRPF6
1929	-1.91894e-05	1.91894e-05	SLC6A8
1930	1.91768e-05	1.91768e-05	RGS17
1931	1.91745e-05	1.91745e-05	ANKRD27
1932	1.91674e-05	1.91674e-05	DDX18
1933	-1.91629e-05	1.91629e-05	BRSK2
1934	-1.91518e-05	1.91518e-05	PLVAP
1935	1.91132e-05	1.91132e-05	KIF3C
1936	1.91071e-05	1.91071e-05	KCTD20
1937	1.91033e-05	1.91033e-05	CEP135
1938	1.91028e-05	1.91028e-05	HSPBP1
1939	1.90396e-05	1.90396e-05	COL6A2
1940	1.90393e-05	1.90393e-05	SNX19
1941	-1.90296e-05	1.90296e-05	ETV5
1942	1.90061e-05	1.90061e-05	GGA1
1943	1.90028e-05	1.90028e-05	SEC11A
1944	1.89695e-05	1.89695e-05	ACAT2
1945	1.896e-05	1.896e-05	CRLF1
1946	1.89463e-05	1.89463e-05	RNF40
1947	-1.88675e-05	1.88675e-05	TRUB1
1948	1.88625e-05	1.88625e-05	PTPN1
1949	-1.88269e-05	1.88269e-05	B3GALT2
1950	1.8809e-05	1.8809e-05	ZNF574
1951	-1.88035e-05	1.88035e-05	RING1
1952	1.87808e-05	1.87808e-05	TMEM30B
1953	-1.87805e-05	1.87805e-05	SAMD14
1954	-1.87786e-05	1.87786e-05	BRI3
1955	1.87703e-05	1.87703e-05	SLC44A2
1956	1.87693e-05	1.87693e-05	ANXA2
1957	1.87227e-05	1.87227e-05	CLCNKA
1958	-1.87216e-05	1.87216e-05	PLOD3
1959	1.87196e-05	1.87196e-05	RHBDL3
1960	-1.87119e-05	1.87119e-05	GRIN3A
1961	1.87038e-05	1.87038e-05	EXOC6
1962	-1.86946e-05	1.86946e-05	RBM3
1963	-1.86462e-05	1.86462e-05	RTKN
1964	-1.86295e-05	1.86295e-05	PGRMC2
1965	-1.86134e-05	1.86134e-05	RPS6KA4
1966	1.86093e-05	1.86093e-05	SPHAR
1967	1.8599e-05	1.8599e-05	UQCRH
1968	-1.85977e-05	1.85977e-05	CHST3
1969	-1.85725e-05	1.85725e-05	USH1G
1970	1.85692e-05	1.85692e-05	NEO1
1971	1.85522e-05	1.85522e-05	CKMT1B
1972	-1.85496e-05	1.85496e-05	PCBD1
1973	1.85416e-05	1.85416e-05	PSMA1
1974	-1.85259e-05	1.85259e-05	C1orf122
1975	1.85174e-05	1.85174e-05	GLCE
1976	1.85138e-05	1.85138e-05	FAM104A
1977	-1.84774e-05	1.84774e-05	PAGR1
1978	1.84765e-05	1.84765e-05	EMC4
1979	1.84606e-05	1.84606e-05	PAN2
1980	-1.84384e-05	1.84384e-05	VASN
1981	-1.84341e-05	1.84341e-05	NCDN
1982	1.84094e-05	1.84094e-05	MAN1C1
1983	1.83802e-05	1.83802e-05	ZFAND2B
1984	-1.8378e-05	1.8378e-05	DNM1
1985	1.8373e-05	1.8373e-05	STMN2
1986	-1.83687e-05	1.83687e-05	CCND2
1987	1.83528e-05	1.83528e-05	TPPP
1988	-1.83359e-05	1.83359e-05	BTF3
1989	-1.83309e-05	1.83309e-05	EIF2B3
1990	1.83223e-05	1.83223e-05	PSMB1
1991	1.83036e-05	1.83036e-05	ANKRD37
1992	-1.8301e-05	1.8301e-05	HSPA2
1993	1.82943e-05	1.82943e-05	ARIH2
1994	1.82921e-05	1.82921e-05	RPL26L1
1995	-1.82403e-05	1.82403e-05	GRASP
1996	1.81953e-05	1.81953e-05	GHITM
1997	-1.81927e-05	1.81927e-05	PARD6A
1998	1.81706e-05	1.81706e-05	ZMAT2
[truncated: 14,744 more rows]

## Sheet: Con_shap
rank	value	abs	SYMBOL
1	-0.0550456	0.0550456	GFAP		The rankings in this one Sheet were obtained through control group calculations.
2	-0.0160397	0.0160397	ZNF91
3	-0.0149272	0.0149272	FAM107A
4	-0.013025	0.013025	RPL31
5	0.0110991	0.0110991	SLC1A3
6	-0.010678	0.010678	CSRP1
7	-0.0100895	0.0100895	CHGA
8	-0.00921508	0.00921508	NPIPA1
9	0.00914807	0.00914807	HBB
10	0.00874871	0.00874871	PLP1
11	-0.0081851	0.0081851	ZNF417
12	0.00768354	0.00768354	GNA11
13	0.00673984	0.00673984	CLU
14	0.00609291	0.00609291	PMP2
15	0.00603655	0.00603655	ALDOC
16	-0.00587042	0.00587042	RPL38
17	0.00557442	0.00557442	TUBB2B
18	0.00548586	0.00548586	N4BP2
19	0.00534224	0.00534224	MT3
20	-0.00513534	0.00513534	PTGDS
21	0.00483231	0.00483231	GFOD1
22	0.00437527	0.00437527	FTH1
23	-0.00431842	0.00431842	PEA15
24	-0.00426721	0.00426721	NDUFA4
25	0.00419801	0.00419801	CPE
26	0.00412375	0.00412375	ZNF652
27	-0.00408924	0.00408924	MT2A
28	0.00398601	0.00398601	ATP6V0C
29	0.00392034	0.00392034	RAB3A
30	-0.00379552	0.00379552	GP1BB
31	0.00376971	0.00376971	HIST1H4C
32	0.00376286	0.00376286	PJA2
33	-0.00367077	0.00367077	CELF5
34	-0.00353524	0.00353524	EEF1A1
35	-0.00350223	0.00350223	ENO2
36	-0.00339536	0.00339536	RPL4
37	-0.00336593	0.00336593	TAGLN3
38	0.00330143	0.00330143	CST3
39	0.00324895	0.00324895	IFITM3
40	-0.00324698	0.00324698	GPM6A
41	-0.00324662	0.00324662	RPS24
42	0.00321513	0.00321513	RPS27
43	-0.00317336	0.00317336	PTN
44	-0.00317094	0.00317094	SV2B
45	0.0030311	0.0030311	SCIN
46	-0.0029437	0.0029437	MT1F
47	-0.00293624	0.00293624	NEFH
48	-0.002877	0.002877	PRRT2
49	0.0028126	0.0028126	TUBA1A
50	-0.00279008	0.00279008	MT1H
51	-0.00277495	0.00277495	SPP1
52	-0.00276134	0.00276134	RPL19
53	0.00274921	0.00274921	SERPINA3
54	0.0025863	0.0025863	C1orf61
55	0.00252506	0.00252506	SRP14
56	0.00249954	0.00249954	BLZF1
57	0.00248808	0.00248808	CNOT2
58	0.00244113	0.00244113	ACTB
59	-0.00237263	0.00237263	DYNC1H1
60	0.00230018	0.00230018	RPL35
61	0.0022143	0.0022143	JUND
62	0.00218584	0.00218584	ARSK
63	0.00217729	0.00217729	HBA2
64	-0.00217495	0.00217495	CLIP3
65	-0.00216089	0.00216089	SEPT5
66	0.00208999	0.00208999	SLFN13
67	0.00208603	0.00208603	UBC
68	0.00200989	0.00200989	LDHB
69	0.00197463	0.00197463	RPL41
70	0.00195988	0.00195988	METTL7A
71	0.00193166	0.00193166	HBA1
72	0.00186507	0.00186507	MT1X
73	0.00185087	0.00185087	MXD4
74	0.00182763	0.00182763	TSC22D4
75	0.00182449	0.00182449	YWHAH
76	-0.00180872	0.00180872	RPL11
77	0.00180723	0.00180723	SYAP1
78	0.00180351	0.00180351	SEPT2
79	0.00173108	0.00173108	EEF1G
80	0.00171409	0.00171409	GABPB2
81	0.00171117	0.00171117	CLSTN1
82	-0.00167424	0.00167424	KIFC2
83	0.00167098	0.00167098	CXXC5
84	-0.00166687	0.00166687	RPL23A
85	-0.00166622	0.00166622	FBXL22
86	0.00162266	0.00162266	EEF1A2
87	-0.00158841	0.00158841	COX7C
88	0.00156212	0.00156212	CKB
89	-0.00154975	0.00154975	RGS11
90	-0.00154739	0.00154739	STMN3
91	-0.00153171	0.00153171	PTMA
92	0.00152881	0.00152881	UBB
93	0.00152228	0.00152228	SCD
94	-0.00150958	0.00150958	CDK2AP1
95	0.00147861	0.00147861	ZNF623
96	-0.00147443	0.00147443	GLUL
97	-0.0014744	0.0014744	BSCL2
98	-0.00146853	0.00146853	CTXN1
99	0.00146066	0.00146066	BCAS1
100	-0.00144479	0.00144479	CAMK2N1
101	-0.00141334	0.00141334	FAM98B
102	0.00141114	0.00141114	PTPRN
103	0.00140402	0.00140402	EXOSC2
104	0.00137412	0.00137412	ZIC2
105	-0.00137037	0.00137037	SCN2A
106	0.0013557	0.0013557	DDAH1
107	0.00131923	0.00131923	IFI6
108	0.00129527	0.00129527	APOE
109	0.00128737	0.00128737	TMSB4X
110	-0.00127021	0.00127021	MT1G
111	0.00125794	0.00125794	PON2
112	0.00124315	0.00124315	TRIM74
113	-0.00123375	0.00123375	UBA52
114	0.00123319	0.00123319	OLAH
115	-0.00123027	0.00123027	NACA
116	0.00121919	0.00121919	AHCYL1
117	0.00121827	0.00121827	PPDPF
118	-0.00121494	0.00121494	RPS3A
119	0.00121081	0.00121081	ZIC1
120	0.00120944	0.00120944	GJA1
121	0.00120803	0.00120803	ITM2C
122	0.00120045	0.00120045	VWF
123	-0.00116961	0.00116961	REEP5
124	-0.00114198	0.00114198	VIM
125	-0.0011367	0.0011367	RPS23
126	-0.00112707	0.00112707	APOD
127	0.00111413	0.00111413	FSIP2
128	-0.00110631	0.00110631	RTN1
129	0.00109134	0.00109134	UQCR10
130	-0.0010835	0.0010835	NAPB
131	0.00104845	0.00104845	RPL37A
132	0.00104496	0.00104496	HBD
133	-0.0010432	0.0010432	ATP1B1
134	0.00101942	0.00101942	SARAF
135	-0.00101051	0.00101051	DDN
136	-0.000992899	0.000992899	PSMA7
137	-0.000987745	0.000987745	TPT1
138	0.000985951	0.000985951	ATP1A2
139	-0.000980868	0.000980868	RPL5
140	0.000977191	0.000977191	SPOP
141	-0.000974513	0.000974513	SOD1
142	-0.000967758	0.000967758	HINT1
143	0.000960705	0.000960705	TTR
144	-0.000958476	0.000958476	ACADVL
145	-0.000957469	0.000957469	GPRC5B
146	0.000951415	0.000951415	VSNL1
147	0.000947966	0.000947966	SPARCL1
148	0.000918639	0.000918639	HTRA1
149	0.00091363	0.00091363	ATP5B
150	-0.000909751	0.000909751	RPS6
151	-0.000905727	0.000905727	RPL18A
152	0.000878521	0.000878521	CALM2
153	-0.000874126	0.000874126	CCNI
154	-0.000872513	0.000872513	NCS1
155	0.000846488	0.000846488	2022-03-06
156	0.000844132	0.000844132	ADIRF
157	0.000840952	0.000840952	SH3GL2
158	-0.00083655	0.00083655	ATP6V0A1
159	0.000830945	0.000830945	LMTK3
160	0.000830943	0.000830943	H1FX
161	0.000827606	0.000827606	GLUD1
162	0.000820283	0.000820283	SCRG1
163	0.00081669	0.00081669	TUBGCP4
164	0.000815337	0.000815337	CLDND1
165	0.000796546	0.000796546	B2M
166	0.000794272	0.000794272	SEPT7
167	0.000793122	0.000793122	CBX6
168	0.000786372	0.000786372	RPL21
169	-0.000758765	0.000758765	EFHD1
170	-0.000757188	0.000757188	APOBEC3A
171	-0.000751486	0.000751486	C11orf58
172	0.000749243	0.000749243	RELN
173	-0.000745631	0.000745631	SNAP25
174	-0.000744901	0.000744901	NUCKS1
175	-0.000737474	0.000737474	NOMO1
176	-0.000734822	0.000734822	NT5C2
177	0.000734428	0.000734428	SLC7A11
178	-0.000728522	0.000728522	CCDC88B
179	-0.000727846	0.000727846	RAP1GAP
180	0.000724442	0.000724442	ETNPPL
181	-0.000723691	0.000723691	RPL18
182	0.00071774	0.00071774	EIF1
183	-0.0007007	0.0007007	RPS25
184	0.000699963	0.000699963	MAPK3
185	0.000699813	0.000699813	RAD51B
186	-0.000699448	0.000699448	ATP5A1
187	0.00068684	0.00068684	RGS4
188	0.000677442	0.000677442	SKP1
189	0.000675052	0.000675052	RPS21
190	0.000674589	0.000674589	EID1
191	0.000669885	0.000669885	SAT1
192	0.000667455	0.000667455	WSB2
193	0.000662565	0.000662565	TPP1
194	0.000662159	0.000662159	BSN
195	0.000661892	0.000661892	BAALC
196	-0.000660859	0.000660859	NDUFB4
197	0.000654933	0.000654933	SHTN1
198	0.000653383	0.000653383	PTOV1
199	0.000649853	0.000649853	ZNF580
200	0.000648162	0.000648162	FCGBP
201	0.000640408	0.000640408	MAPK8IP3
202	-0.000640365	0.000640365	METTL21A
203	0.000637929	0.000637929	CHN1
204	-0.000637166	0.000637166	HSPA1B
205	-0.000636454	0.000636454	GPR37
206	-0.000633841	0.000633841	RHOBTB3
207	-0.000624405	0.000624405	PHGDH
208	0.000621934	0.000621934	RERE
209	-0.00062154	0.00062154	SVOP
210	-0.00061804	0.00061804	SIRPA
211	-0.000605944	0.000605944	BEX4
212	-0.000604529	0.000604529	STX1A
213	0.000604298	0.000604298	NDUFA5
214	0.000600841	0.000600841	STOX2
215	0.000595924	0.000595924	PIH1D3
216	0.000591302	0.000591302	POU2F1
217	-0.00058159	0.00058159	PPP2R1A
218	0.000576478	0.000576478	RPS26
219	-0.000573504	0.000573504	COX5A
220	0.000571465	0.000571465	NWD1
221	-0.000570532	0.000570532	RPS8
222	0.000567366	0.000567366	SRGAP3
223	0.000564768	0.000564768	CHCHD2
224	0.000557692	0.000557692	RPL24
225	0.000557109	0.000557109	CLCN7
226	0.000550599	0.000550599	NDRG2
227	-0.000546289	0.000546289	SNRNP70
228	0.000544302	0.000544302	CALM1
229	0.000543784	0.000543784	DIP2B
230	0.000542832	0.000542832	RPL37
231	-0.000535643	0.000535643	PEG3
232	0.000534626	0.000534626	TCF7
233	-0.000533012	0.000533012	CEP135
234	0.000531817	0.000531817	RPS20
235	0.000522836	0.000522836	TUBA1B
236	0.000519225	0.000519225	MGST3
237	0.000518226	0.000518226	RBM14
238	-0.000510533	0.000510533	TMEM59L
239	-0.000506441	0.000506441	MDH1
240	-0.000504765	0.000504765	RPLP1
241	-0.000503069	0.000503069	CHD5
242	-0.000502099	0.000502099	CDK5RAP3
243	-0.00049982	0.00049982	PTTG1IP
244	-0.000498512	0.000498512	RDH11
245	0.000494424	0.000494424	TRIM44
246	0.000493897	0.000493897	TMBIM6
247	-0.000493872	0.000493872	TSPOAP1
248	-0.000492282	0.000492282	RHOT2
249	-0.000492125	0.000492125	YPEL5
250	-0.000486332	0.000486332	LMO4
251	-0.000484112	0.000484112	NDRG4
252	-0.000483689	0.000483689	ADD3
253	0.000483432	0.000483432	TSC22D1
254	-0.000478341	0.000478341	ZCCHC24
255	-0.000472073	0.000472073	CEBPD
256	0.00047155	0.00047155	SNX10
257	0.000470551	0.000470551	SYT4
258	0.000469806	0.000469806	S100A8
259	-0.00046903	0.00046903	LMO3
260	0.000467937	0.000467937	RGL1
261	0.000463396	0.000463396	RPS4X
262	-0.000460053	0.000460053	PNPLA8
263	0.000457897	0.000457897	BNIP3
264	-0.000455015	0.000455015	RPL12
265	0.000454022	0.000454022	BTBD2
266	0.0004515	0.0004515	SEPW1
267	0.00045016	0.00045016	CANX
268	0.000448752	0.000448752	PDLIM5
269	-0.000446456	0.000446456	DYNLL1
270	-0.000446319	0.000446319	PFKL
271	-0.000446041	0.000446041	XRCC5
272	0.000442191	0.000442191	HIGD1A
273	-0.000441002	0.000441002	RCAN2
274	0.00044046	0.00044046	MARK2
275	-0.000440368	0.000440368	SLC25A18
276	0.000439422	0.000439422	PAX6
277	-0.000429733	0.000429733	ADGRG1
278	0.000429655	0.000429655	KPNA6
279	0.000427207	0.000427207	CYP4F3
280	0.000425932	0.000425932	ZFP36L1
281	0.000425851	0.000425851	ZNF358
282	0.000424651	0.000424651	HMGN2
283	-0.000421223	0.000421223	HEY1
284	-0.000419318	0.000419318	ICAM5
285	0.000418627	0.000418627	FTL
286	0.000418603	0.000418603	RPSA
287	0.000418293	0.000418293	RPS7
288	0.000414554	0.000414554	FEZ2
289	-0.000411523	0.000411523	SLC38A2
290	-0.000410403	0.000410403	SUGP2
291	0.000409715	0.000409715	FGFR3
292	-0.000409626	0.000409626	RPL39
293	-0.00040876	0.00040876	SPOCK1
294	0.000408283	0.000408283	FABP5
295	-0.000406467	0.000406467	GRM4
296	-0.000406218	0.000406218	ITM2B
297	0.000404944	0.000404944	ATPAF1
298	0.000400408	0.000400408	PPIAL4A
299	-0.0004002	0.0004002	ATP6V1B2
300	0.000399888	0.000399888	CRYAB
301	0.000399786	0.000399786	DTNA
302	0.000398019	0.000398019	MAP2
303	0.00039695	0.00039695	COX4I1
304	0.000396815	0.000396815	DNAJA2
305	-0.000396598	0.000396598	GAPDH
306	-0.000396132	0.000396132	RAB15
307	-0.00039515	0.00039515	VWA1
308	-0.000394997	0.000394997	KIAA0513
309	-0.000394151	0.000394151	PFDN5
310	0.000393857	0.000393857	ELK1
311	-0.000393396	0.000393396	S100A13
312	0.000388692	0.000388692	GPT2
313	0.000388121	0.000388121	MAOA
314	-0.000382969	0.000382969	SDC3
315	-0.000380546	0.000380546	STAT2
316	0.000380403	0.000380403	F3
317	0.000378691	0.000378691	HSPA6
318	-0.000378559	0.000378559	HARS
319	0.000375411	0.000375411	PDK4
320	-0.000375186	0.000375186	RAB40C
321	0.000374612	0.000374612	RPL3
322	0.000373241	0.000373241	SMIM14
323	0.000371733	0.000371733	ATP5F1
324	-0.00037066	0.00037066	RAB26
325	-0.000368034	0.000368034	GDI1
326	-0.000365852	0.000365852	FEZ1
327	-0.000365758	0.000365758	APLNR
328	-0.000363834	0.000363834	FAU
329	0.000359182	0.000359182	KCNK12
330	0.000358633	0.000358633	RAB10
331	-0.000358619	0.000358619	TUBB4B
332	-0.000358302	0.000358302	CA10
333	0.000357186	0.000357186	POM121
334	0.000354523	0.000354523	TNFRSF25
335	-0.000350904	0.000350904	MGEA5
336	0.000349686	0.000349686	DUSP3
337	0.000342277	0.000342277	H1F0
338	0.000342162	0.000342162	NARS
339	0.000341522	0.000341522	IL18
340	0.000339659	0.000339659	ACTG1
341	-0.000339508	0.000339508	MT1M
342	0.000338749	0.000338749	RPL9
343	-0.000335134	0.000335134	MAN2C1
344	0.000334961	0.000334961	TTC17
345	-0.000333299	0.000333299	YPEL3
346	0.000333134	0.000333134	SPCS1
347	0.000333098	0.000333098	CHGB
348	-0.000333032	0.000333032	HAPLN4
349	-0.000331325	0.000331325	CNP
350	0.000331048	0.000331048	FERMT2
351	-0.000331043	0.000331043	RACK1
352	0.000330522	0.000330522	MORF4L1
353	0.000327948	0.000327948	APOLD1
354	-0.00032356	0.00032356	GABARAP
355	-0.000323292	0.000323292	RGMA
356	-0.00032279	0.00032279	EEF2
357	0.000322523	0.000322523	RGCC
358	-0.000321899	0.000321899	RPL27A
359	0.000315655	0.000315655	ALS2
360	-0.000314552	0.000314552	YBX1
361	0.000314237	0.000314237	RPS14
362	0.000311296	0.000311296	DTX3
363	0.000310692	0.000310692	EIF1B
364	-0.000310595	0.000310595	PEBP1
365	-0.00030637	0.00030637	RPLP2
366	0.000305211	0.000305211	PFKP
367	0.000303127	0.000303127	PLLP
368	0.000297586	0.000297586	WDR34
369	-0.000297481	0.000297481	TUBB2A
370	0.000296651	0.000296651	MPC1
371	0.000296125	0.000296125	TMEM145
372	0.000293512	0.000293512	ABLIM1
373	-0.000293197	0.000293197	GNAI2
374	-0.000293147	0.000293147	ITM2A
375	0.00029146	0.00029146	PIP5K1C
376	-0.000291346	0.000291346	PRKCB
377	0.000290804	0.000290804	PSMD11
378	0.000289224	0.000289224	UGP2
379	0.000288274	0.000288274	ARGLU1
380	0.000287675	0.000287675	CCND2
381	0.000286614	0.000286614	S1PR1
382	-0.000286534	0.000286534	RPS28
383	0.000286214	0.000286214	KBTBD6
384	-0.000285893	0.000285893	ARL6IP5
385	0.000285456	0.000285456	ITCH
386	0.000284606	0.000284606	TMEM59
387	0.000284431	0.000284431	MAOB
388	0.000283789	0.000283789	OPALIN
389	-0.000283255	0.000283255	ATP6V1E1
390	0.000283174	0.000283174	CHMP4B
391	-0.000283053	0.000283053	NEBL
392	0.000281332	0.000281332	AGO2
393	0.000280906	0.000280906	CNIH2
394	-0.000279632	0.000279632	ALKBH5
395	-0.000279206	0.000279206	DPYSL2
396	-0.000278995	0.000278995	RPL30
397	0.000278768	0.000278768	KLF9
398	0.000277915	0.000277915	LHX2
399	-0.000277398	0.000277398	SP100
400	0.000276527	0.000276527	SNAPC1
401	0.000276059	0.000276059	LDHA
402	-0.000275807	0.000275807	RAMP1
403	-0.000274118	0.000274118	ATP5G1
404	-0.000274085	0.000274085	ATP6V0B
405	-0.00027399	0.00027399	CA11
406	0.000273783	0.000273783	MAPK8IP1
407	-0.000273771	0.000273771	CLDN11
408	0.000269577	0.000269577	ATP6AP2
409	0.000268409	0.000268409	DUSP26
410	-0.000268182	0.000268182	BEX1
411	0.000267444	0.000267444	MIF
412	0.000266146	0.000266146	HSPA9
413	-0.000265693	0.000265693	DAAM2
414	-0.000264201	0.000264201	ECHDC2
415	0.000263129	0.000263129	SRP9
416	-0.000263048	0.000263048	SET
417	-0.000262997	0.000262997	KIAA1109
418	0.000262228	0.000262228	RPL23
419	0.000261163	0.000261163	RPS18
420	0.000260125	0.000260125	HSD17B12
421	-0.000259876	0.000259876	AP1G2
422	0.000259839	0.000259839	TSPYL2
423	0.000258754	0.000258754	RPS27L
424	-0.000257623	0.000257623	GARNL3
425	0.000257408	0.000257408	TXNIP
426	-0.000256971	0.000256971	KCNJ10
427	-0.000255412	0.000255412	SERBP1
428	0.000255101	0.000255101	COX8A
429	-0.000254297	0.000254297	MLLT11
430	-0.000254014	0.000254014	NOMO2
431	0.00025366	0.00025366	PPP1R3C
432	0.000252939	0.000252939	RPL26
433	0.000252488	0.000252488	RSU1
434	0.000252213	0.000252213	EXOC6B
435	0.000252147	0.000252147	ZYG11B
436	-0.000251031	0.000251031	HPCAL1
437	-0.000250037	0.000250037	SLIRP
438	0.000249607	0.000249607	ATXN2
439	0.000248717	0.000248717	MAP1A
440	0.000248516	0.000248516	ARL6IP1
441	0.00024746	0.00024746	RPS27A
442	0.000247024	0.000247024	MAP6D1
443	0.000246467	0.000246467	PAFAH1B3
444	0.000244107	0.000244107	CAMLG
445	0.000243356	0.000243356	POMP
446	0.000243117	0.000243117	PRR13
447	-0.00024291	0.00024291	DNER
448	0.000242893	0.000242893	PIGX
449	-0.000242687	0.000242687	SNTA1
450	0.000240979	0.000240979	PPP1R13B
451	0.00024092	0.00024092	DUSP8
452	0.000240823	0.000240823	GCSH
453	0.000239305	0.000239305	C5orf24
454	0.000238929	0.000238929	ZNF671
455	-0.000238925	0.000238925	FAM217B
456	0.000238785	0.000238785	DCLK1
457	0.00023829	0.00023829	TACC1
458	0.000235784	0.000235784	FAM200A
459	0.000235054	0.000235054	PSAT1
460	0.000234703	0.000234703	GOLGA2
461	0.000234628	0.000234628	MDH2
462	0.000234101	0.000234101	NPTN
463	0.000234027	0.000234027	MTURN
464	-0.000232694	0.000232694	CHRNA5
465	0.000231402	0.000231402	PIAS4
466	-0.000230471	0.000230471	KLC2
467	0.000230073	0.000230073	NEFM
468	-0.000229112	0.000229112	TNK2
469	0.000228232	0.000228232	LLPH
470	0.000227081	0.000227081	RPP21
471	0.0002269	0.0002269	INF2
472	0.000225494	0.000225494	TFRC
473	0.000224818	0.000224818	SPRED1
474	-0.000224267	0.000224267	AIF1L
475	0.000223579	0.000223579	NXPE2
476	0.000223512	0.000223512	PTCHD1
477	-0.000223314	0.000223314	MFSD10
478	0.000223205	0.000223205	EHD1
479	-0.00022209	0.00022209	TMEM130
480	0.000221456	0.000221456	PINK1
481	-0.000220587	0.000220587	PRNP
482	-0.000220408	0.000220408	MRPL57
483	-0.000219564	0.000219564	PPA1
484	-0.000219077	0.000219077	GARS
485	-0.000218382	0.000218382	TTC3
486	0.000217575	0.000217575	SCARB2
487	-0.000216888	0.000216888	EZR
488	0.000216512	0.000216512	SLC44A4
489	0.000214965	0.000214965	NDUFS8
490	-0.000212921	0.000212921	FKBP1A
491	0.000211586	0.000211586	LRRC47
492	0.000210623	0.000210623	HEXDC
493	-0.000210453	0.000210453	FUT6
494	-0.000210416	0.000210416	HSF4
495	-0.000209696	0.000209696	NDUFV1
496	0.000209528	0.000209528	TLE2
497	0.000208918	0.000208918	CD59
498	-0.000208577	0.000208577	PFN1
499	-0.000208513	0.000208513	PVALB
500	-0.000208489	0.000208489	CACNG3
501	0.000208486	0.000208486	ARL8B
502	0.000206164	0.000206164	TCF4
503	-0.000205454	0.000205454	ADIPOR2
504	0.000204427	0.000204427	SLITRK4
505	0.000204328	0.000204328	GPR137B
506	-0.00020403	0.00020403	PNMA2
507	0.00020338	0.00020338	WDR6
508	0.000202457	0.000202457	DECR1
509	-0.000201421	0.000201421	PUM1
510	0.000201147	0.000201147	MAL
511	-0.000201036	0.000201036	CERS5
512	0.000199595	0.000199595	CABP1
513	-0.000199591	0.000199591	NPC2
514	-0.000199474	0.000199474	PLEKHB1
515	0.000199274	0.000199274	2022-03-02
516	-0.000198475	0.000198475	FOXP1
517	0.000196643	0.000196643	HDDC2
518	0.000196269	0.000196269	ZNF521
519	0.000196204	0.000196204	DBI
520	0.000196073	0.000196073	RHEB
521	0.000195963	0.000195963	ASPHD2
522	0.00019592	0.00019592	CRMP1
523	-0.000195408	0.000195408	COTL1
524	0.000195077	0.000195077	CLIC4
525	0.000194766	0.000194766	HSPB8
526	0.00019466	0.00019466	ZFAND5
527	-0.000194561	0.000194561	CCNL2
528	0.0001945	0.0001945	DMAP1
529	-0.000194392	0.000194392	CDC42EP4
530	0.000194171	0.000194171	ATP1B2
531	0.000194065	0.000194065	NDUFC2
532	-0.000193393	0.000193393	MEF2C
533	0.000192682	0.000192682	MAST1
534	0.000192449	0.000192449	RCAN1
535	0.000191593	0.000191593	CAMK2B
536	0.000190757	0.000190757	RPL36A
537	0.000190363	0.000190363	CHMP5
538	0.000189683	0.000189683	STOM
539	-0.000189485	0.000189485	MYBPC1
540	0.000188318	0.000188318	NEFL
541	0.000188082	0.000188082	FAM57B
542	0.000188049	0.000188049	PNMA1
543	0.000187461	0.000187461	CBFB
544	-0.00018746	0.00018746	LPIN1
545	-0.000187309	0.000187309	JMJD7-PLA2G4B
546	-0.000187307	0.000187307	ANKRD44
547	0.000186974	0.000186974	NAPA
548	0.000186094	0.000186094	FIS1
549	-0.000186016	0.000186016	CPT1C
550	-0.000185545	0.000185545	ZNF665
551	0.000184379	0.000184379	GHITM
552	-0.00018414	0.00018414	RPL10A
553	-0.000182553	0.000182553	SYP
554	0.000182309	0.000182309	EIF3C
555	0.000182285	0.000182285	TMBIM1
556	-0.000182198	0.000182198	ZNF492
557	0.000181824	0.000181824	NRN1
558	0.000180988	0.000180988	TKT
559	0.000180882	0.000180882	NDUFB5
560	0.000180625	0.000180625	INPP5A
561	-0.000180588	0.000180588	DYNC1LI2
562	0.000180063	0.000180063	GAP43
563	0.000179894	0.000179894	RASIP1
564	-0.000179002	0.000179002	NPTX2
565	0.000177796	0.000177796	SH3BGRL
566	-0.000177562	0.000177562	FAIM2
567	0.000177044	0.000177044	FN3K
568	-0.000176478	0.000176478	KCNB1
569	-0.000176399	0.000176399	RHOU
570	-0.000175932	0.000175932	XIAP
571	0.000175385	0.000175385	RAPGEF4
572	-0.000175229	0.000175229	TIMP1
573	-0.000172891	0.000172891	ULK3
574	-0.000172747	0.000172747	FAM131A
575	-0.00017268	0.00017268	SRSF5
576	0.000172624	0.000172624	SETBP1
577	-0.000172506	0.000172506	FASN
578	0.0001721	0.0001721	SLPI
579	0.000172028	0.000172028	MZT2B
580	-0.000171707	0.000171707	ANKZF1
581	0.000171059	0.000171059	NDUFS5
582	-0.00017057	0.00017057	PDZD4
583	-0.000169956	0.000169956	TSPAN18
584	0.000169668	0.000169668	TRIM2
585	0.000169593	0.000169593	IRF2BPL
586	0.000169584	0.000169584	SOD3
587	0.000167744	0.000167744	FADS2
588	-0.000167681	0.000167681	ANP32B
589	-0.00016747	0.00016747	MRAS
590	0.000167387	0.000167387	OAZ1
591	0.000166668	0.000166668	GNL3L
592	0.000164839	0.000164839	ERAP2
593	0.000164628	0.000164628	PCDHB9
594	-0.000164345	0.000164345	ISCU
595	-0.00016378	0.00016378	ZBTB7A
596	-0.000163568	0.000163568	HP
597	-0.000163054	0.000163054	NSA2
598	-0.000161804	0.000161804	FAM50A
599	-0.000161653	0.000161653	PSD2
600	0.000161186	0.000161186	PFN2
601	0.000160841	0.000160841	LGALS1
602	0.000159822	0.000159822	ZDHHC8
603	-0.000159216	0.000159216	DDX56
604	0.000159172	0.000159172	ATP6V1A
605	0.000159128	0.000159128	DIP2C
606	0.000159113	0.000159113	HDGFRP3
607	0.000159066	0.000159066	PAIP2B
608	-0.000158533	0.000158533	TSPAN9
609	0.000158119	0.000158119	AK3
610	-0.000158104	0.000158104	MICAL2
611	0.000157828	0.000157828	ALDH2
612	0.000157614	0.000157614	C10orf10
613	0.000157195	0.000157195	VSIG1
614	0.000156379	0.000156379	CERS6
615	0.000156367	0.000156367	ENO1
616	-0.000155753	0.000155753	GNAS
617	0.000155675	0.000155675	SV2A
618	-0.000154445	0.000154445	HPCAL4
619	0.000154144	0.000154144	TBC1D32
620	0.000154078	0.000154078	CADM1
621	0.000153205	0.000153205	THUMPD1
622	0.000153126	0.000153126	TMEM51
623	-0.000152951	0.000152951	ITPKB
624	-0.000152793	0.000152793	PPP3R1
625	0.000152631	0.000152631	CSAD
626	-0.000152388	0.000152388	BLOC1S1
627	-0.000152277	0.000152277	NDUFS7
628	0.00015205	0.00015205	SEPT9
629	-0.000152033	0.000152033	SLC30A3
630	0.000151632	0.000151632	KLHL3
631	-0.000151086	0.000151086	CPNE6
632	-0.000150783	0.000150783	PSMB7
633	0.000150366	0.000150366	HDAC4
634	0.000150137	0.000150137	ZNF444
635	0.000149948	0.000149948	PAQR8
636	0.000149596	0.000149596	FCGR3A
637	-0.000148799	0.000148799	TERF2IP
638	-0.000148746	0.000148746	TUBA4A
639	-0.000148727	0.000148727	PAN2
640	0.00014867	0.00014867	CA2
641	0.000148652	0.000148652	CDK14
642	0.000148583	0.000148583	KAT6A
643	-0.000148583	0.000148583	LY6H
644	0.000148481	0.000148481	PAQR6
645	0.00014848	0.00014848	TMEM47
646	-0.000148345	0.000148345	NFIA
647	0.000148079	0.000148079	MBLAC1
648	0.000148008	0.000148008	LARP1
649	0.000147134	0.000147134	SSU72
650	-0.000147013	0.000147013	GPM6B
651	-0.000146988	0.000146988	C1orf43
652	0.000146929	0.000146929	CALB2
653	-0.000146916	0.000146916	RPL15
654	-0.000146873	0.000146873	ATCAY
655	0.000146788	0.000146788	PCP4
656	-0.000145962	0.000145962	COBL
657	-0.000145704	0.000145704	PDDC1
658	-0.000145381	0.000145381	POGZ
659	0.000145011	0.000145011	NRCAM
660	-0.000144371	0.000144371	BGN
661	0.000144227	0.000144227	TBCA
662	0.000143508	0.000143508	GLTSCR2
663	-0.00014308	0.00014308	PPIP5K1
664	0.000142651	0.000142651	SH3BGRL3
665	-0.000142559	0.000142559	KLC1
666	0.00014233	0.00014233	BTG1
667	0.000140979	0.000140979	SLC48A1
668	-0.000140924	0.000140924	EVL
669	-0.000140815	0.000140815	STK36
670	-0.00014037	0.00014037	KCNS1
671	0.000140306	0.000140306	PARD6A
672	0.000139846	0.000139846	ZNF791
673	0.000139636	0.000139636	CAST
674	-0.000139457	0.000139457	PRPF19
675	0.000139359	0.000139359	RUFY3
676	0.00013931	0.00013931	PTPN11
677	0.000138832	0.000138832	FBXO2
678	-0.000138809	0.000138809	CSDE1
679	0.000138462	0.000138462	SLC35E2B
680	-0.000138447	0.000138447	ATP5G3
681	0.000138132	0.000138132	SATB1
682	0.000137356	0.000137356	MMS19
683	0.000136669	0.000136669	EIF4G2
684	-0.000136507	0.000136507	PNPLA7
685	-0.000136502	0.000136502	COX5B
686	0.000136256	0.000136256	SH3GL3
687	-0.000134746	0.000134746	C2CD5
688	0.000134366	0.000134366	ACD
689	0.000134092	0.000134092	TRMT112
690	-0.000134075	0.000134075	PLA2G16
691	0.000133738	0.000133738	CD81
692	0.000133444	0.000133444	TYMP
693	0.000133433	0.000133433	KLHDC3
694	-0.000132743	0.000132743	PRDX6
695	0.000132231	0.000132231	BASP1
696	0.000131791	0.000131791	PA2G4
697	0.000131644	0.000131644	TMEM267
698	0.000131589	0.000131589	MAG
699	-0.000131202	0.000131202	LRRFIP1
700	-0.000131085	0.000131085	CES4A
701	0.000131079	0.000131079	C3
702	-0.000131025	0.000131025	NFKBIA
703	-0.000130638	0.000130638	CYC1
704	-0.000129954	0.000129954	CDH2
705	-0.000129632	0.000129632	RPS3
706	-0.000129443	0.000129443	NRXN3
707	0.000129434	0.000129434	RUNDC3A
708	0.00012937	0.00012937	NCOA4
709	0.000129308	0.000129308	STK39
710	0.000129278	0.000129278	JAKMIP1
711	-0.000128784	0.000128784	RING1
712	-0.000128582	0.000128582	RPS6KL1
713	0.000128332	0.000128332	LGI4
714	0.000128305	0.000128305	MYL12A
715	0.000127654	0.000127654	NDP
716	0.000127617	0.000127617	USP22
717	-0.000126974	0.000126974	COX7B
718	0.000126829	0.000126829	LYRM5
719	-0.000126732	0.000126732	GPR1
720	-0.000126519	0.000126519	PCBP1
721	0.000125874	0.000125874	PTPRZ1
722	-0.000125865	0.000125865	P4HTM
723	0.000125783	0.000125783	TRIM37
724	-0.00012528	0.00012528	GRIPAP1
725	-0.000124468	0.000124468	RBPJ
726	0.000124079	0.000124079	SUV39H2
727	-0.000123913	0.000123913	RASAL1
728	-0.000123199	0.000123199	LMBR1L
729	0.000122618	0.000122618	SDHC
730	-0.000122451	0.000122451	ZER1
731	-0.000121369	0.000121369	PIH1D1
732	0.000121271	0.000121271	RPS19
733	0.000121205	0.000121205	NREP
734	0.000120895	0.000120895	MAGED4B
735	-0.000120796	0.000120796	DNAL4
736	-0.000120778	0.000120778	NPEPL1
737	-0.000120679	0.000120679	CAMKV
738	-0.000120677	0.000120677	CAPN2
739	0.000120256	0.000120256	TOMM34
740	-0.000119636	0.000119636	GAD2
741	0.000119612	0.000119612	HSP90AB1
742	0.000119406	0.000119406	PALLD
743	-0.00011926	0.00011926	ATP6V1G1
744	0.000119148	0.000119148	STXBP4
745	0.000118663	0.000118663	TMEM63A
746	-0.000118634	0.000118634	HSPA1A
747	0.000117968	0.000117968	GPS1
748	-0.000117475	0.000117475	PLCG1
749	-0.000117306	0.000117306	DTNB
750	-0.000117236	0.000117236	CEMIP
751	-0.000116859	0.000116859	AARS
752	0.000116758	0.000116758	S100A1
753	0.000116744	0.000116744	SAFB2
754	-0.000116714	0.000116714	CTNNA2
755	-0.000116536	0.000116536	CALY
756	0.000116347	0.000116347	CARS2
757	0.000116049	0.000116049	NDUFB8
758	-0.000115905	0.000115905	SEC31A
759	0.000115873	0.000115873	HSPH1
760	-0.000115262	0.000115262	TCEB1
761	-0.000115011	0.000115011	FYN
762	-0.000114787	0.000114787	TUBA3FP
763	0.000114754	0.000114754	PSMC5
764	-0.000114739	0.000114739	EML2
765	-0.00011462	0.00011462	NECAB2
766	-0.000114583	0.000114583	CCP110
767	0.000114444	0.000114444	OAT
768	-0.000114437	0.000114437	GRIA2
769	-0.000114415	0.000114415	DIRAS1
770	0.000113956	0.000113956	CHI3L1
771	-0.000113509	0.000113509	MAPRE1
772	-0.000113502	0.000113502	SCAP
773	-0.000113291	0.000113291	JAM3
774	-0.000113256	0.000113256	CD99L2
775	-0.000113117	0.000113117	CNTNAP2
776	0.000112804	0.000112804	SHCBP1
777	-0.000112743	0.000112743	GTF3C5
778	-0.000111834	0.000111834	ZRANB1
779	-0.000110977	0.000110977	YWHAG
780	-0.000110954	0.000110954	RPL32
781	0.000110906	0.000110906	RTN4
782	0.000110763	0.000110763	MOBP
783	0.000110675	0.000110675	MAPRE3
784	-0.000110472	0.000110472	SGSM2
785	-0.000109712	0.000109712	APBB3
786	0.000109702	0.000109702	ALDH6A1
787	-0.000109645	0.000109645	CCKBR
788	-0.000108872	0.000108872	ANKLE1
789	-0.000108422	0.000108422	TCEAL2
790	-0.00010809	0.00010809	COL6A1
791	-0.000108004	0.000108004	LAMTOR5
792	0.000107676	0.000107676	ZNF454
793	0.000107585	0.000107585	CBR4
794	0.00010728	0.00010728	FMNL2
795	0.000106878	0.000106878	PODXL2
796	-0.000106333	0.000106333	COL16A1
797	0.000106276	0.000106276	NCOR2
798	0.000106219	0.000106219	PILRB
799	-0.000106171	0.000106171	SGK223
800	-0.0001061	0.0001061	ZNF428
801	0.000106099	0.000106099	COL4A5
802	-0.000105976	0.000105976	SRRM4
803	0.000105897	0.000105897	RTN3
804	-0.000105742	0.000105742	AQP1
805	0.00010558	0.00010558	TIMP3
806	-0.000105534	0.000105534	TMEM158
807	-0.000105439	0.000105439	SELO
808	0.000104957	0.000104957	SRRM2
809	0.000104807	0.000104807	CLUH
810	0.000104735	0.000104735	GABBR1
811	-0.000104701	0.000104701	TMEM175
812	0.000104165	0.000104165	NAP1L3
813	-0.000103984	0.000103984	GSDMB
814	-0.000103854	0.000103854	FAHD2A
815	0.000103684	0.000103684	PAAF1
816	-0.000103514	0.000103514	MYL6
817	-0.000103326	0.000103326	HMGN3
818	0.000103308	0.000103308	RRAGC
819	-0.000103261	0.000103261	YWHAE
820	-0.000103126	0.000103126	NDUFB9
821	-0.00010311	0.00010311	GOT1
822	0.000102899	0.000102899	NNAT
823	0.000102713	0.000102713	TRAM1
824	-0.000102538	0.000102538	AIRE
825	0.000102489	0.000102489	MBNL2
826	0.000102402	0.000102402	GALNT2
827	0.000102298	0.000102298	HSPE1
828	-0.000102212	0.000102212	NEUROD6
829	0.000101925	0.000101925	BCL2L2
830	0.000101857	0.000101857	SPCS2
831	-0.000101844	0.000101844	PSMA6
832	-0.000101458	0.000101458	TMEM245
833	0.000101437	0.000101437	SPTBN2
834	-0.000101393	0.000101393	PPP1CC
835	-0.00010135	0.00010135	C2orf15
836	-0.000100956	0.000100956	ISG15
837	-0.000100475	0.000100475	RHOC
838	-0.000100375	0.000100375	TRAPPC2L
839	0.000100213	0.000100213	CLIP2
840	0.000100033	0.000100033	WBSCR17
841	-9.99637e-05	9.99637e-05	SLC25A39
842	9.99245e-05	9.99245e-05	CDC14B
843	-9.96433e-05	9.96433e-05	CCK
844	9.95282e-05	9.95282e-05	POMT1
845	-9.94733e-05	9.94733e-05	RPL35A
846	-9.94529e-05	9.94529e-05	MTCH1
847	9.94074e-05	9.94074e-05	MC1R
848	-9.89958e-05	9.89958e-05	ZDHHC23
849	9.8975e-05	9.8975e-05	RPL27
850	-9.89179e-05	9.89179e-05	EHBP1L1
851	-9.88049e-05	9.88049e-05	ARL2
852	-9.8509e-05	9.8509e-05	NPM1
853	-9.812e-05	9.812e-05	VAMP5
854	-9.8036e-05	9.8036e-05	SPHAR
855	-9.80241e-05	9.80241e-05	FBXW7
856	-9.74852e-05	9.74852e-05	MAP1LC3A
857	9.73409e-05	9.73409e-05	SYNJ2BP
858	-9.73137e-05	9.73137e-05	OLIG1
859	9.71783e-05	9.71783e-05	ALDH5A1
860	-9.68704e-05	9.68704e-05	C1QB
861	-9.66717e-05	9.66717e-05	NDE1
862	9.66537e-05	9.66537e-05	CCDC90B
863	9.66188e-05	9.66188e-05	MGLL
864	9.65842e-05	9.65842e-05	WIPF2
865	9.63827e-05	9.63827e-05	COX6C
866	-9.61397e-05	9.61397e-05	APCDD1
867	-9.60268e-05	9.60268e-05	EIF4A1
868	9.60037e-05	9.60037e-05	EPM2AIP1
869	9.58261e-05	9.58261e-05	PPP2R5B
870	9.58239e-05	9.58239e-05	LANCL1
871	9.57409e-05	9.57409e-05	WARS
872	-9.55155e-05	9.55155e-05	ARF4
873	9.54069e-05	9.54069e-05	DPF3
874	-9.52301e-05	9.52301e-05	MAST3
875	9.51499e-05	9.51499e-05	LAPTM4A
876	-9.50866e-05	9.50866e-05	CBLB
877	-9.50478e-05	9.50478e-05	DCN
878	-9.4895e-05	9.4895e-05	SNU13
879	9.48048e-05	9.48048e-05	U2AF1
880	-9.46626e-05	9.46626e-05	MYH10
881	9.46158e-05	9.46158e-05	PAG1
882	9.44115e-05	9.44115e-05	CC2D1A
883	-9.43795e-05	9.43795e-05	DNAJA1
884	-9.43437e-05	9.43437e-05	AMER2
885	9.41152e-05	9.41152e-05	CYBRD1
886	-9.40542e-05	9.40542e-05	NAP1L1
887	-9.40404e-05	9.40404e-05	CARM1
888	-9.39871e-05	9.39871e-05	SLC1A2
889	-9.36084e-05	9.36084e-05	RPL6
890	9.35945e-05	9.35945e-05	HSPA12A
891	9.35208e-05	9.35208e-05	FADS1
892	-9.34085e-05	9.34085e-05	RAB37
893	-9.33557e-05	9.33557e-05	SOX8
894	9.33537e-05	9.33537e-05	CALB1
895	-9.30073e-05	9.30073e-05	EMD
896	9.2967e-05	9.2967e-05	C11orf68
897	9.27468e-05	9.27468e-05	MMP17
898	9.2575e-05	9.2575e-05	ARHGDIB
899	9.24207e-05	9.24207e-05	OLFM1
900	9.23188e-05	9.23188e-05	COX6A1
901	-9.20352e-05	9.20352e-05	RRAGD
902	9.17931e-05	9.17931e-05	RNF182
903	-9.17245e-05	9.17245e-05	SBDS
904	9.16027e-05	9.16027e-05	AHSA2
905	-9.14305e-05	9.14305e-05	ALDH4A1
906	9.14172e-05	9.14172e-05	KPTN
907	9.12497e-05	9.12497e-05	RUSC1
908	9.11023e-05	9.11023e-05	ACSS1
909	-9.10158e-05	9.10158e-05	DDX3X
910	9.10126e-05	9.10126e-05	ARPC3
911	-9.05887e-05	9.05887e-05	SYT1
912	9.02242e-05	9.02242e-05	NCKAP1
913	8.99346e-05	8.99346e-05	WSCD2
914	-8.98836e-05	8.98836e-05	PYURF
915	-8.98707e-05	8.98707e-05	ENPP2
916	8.98013e-05	8.98013e-05	ASRGL1
917	-8.95756e-05	8.95756e-05	PALM
918	8.95274e-05	8.95274e-05	SDHA
919	-8.94342e-05	8.94342e-05	SGK1
920	8.94254e-05	8.94254e-05	MRPS36
921	-8.93176e-05	8.93176e-05	KLHDC2
922	-8.92016e-05	8.92016e-05	BSDC1
923	-8.85233e-05	8.85233e-05	POLR2I
924	-8.84536e-05	8.84536e-05	FNTA
925	-8.8291e-05	8.8291e-05	DCAF8
926	8.82513e-05	8.82513e-05	COQ8A
927	-8.80259e-05	8.80259e-05	MRFAP1
928	-8.79391e-05	8.79391e-05	TCEB2
929	-8.77396e-05	8.77396e-05	GPX4
930	8.76681e-05	8.76681e-05	GLO1
931	-8.7649e-05	8.7649e-05	SCN11A
932	8.75779e-05	8.75779e-05	POLB
933	-8.74655e-05	8.74655e-05	SLC25A29
934	-8.74394e-05	8.74394e-05	HLA-DPB1
935	-8.72837e-05	8.72837e-05	KLHL22
936	8.72029e-05	8.72029e-05	ELOVL4
937	-8.67471e-05	8.67471e-05	PPM1K
938	8.66563e-05	8.66563e-05	CHD9
939	8.66474e-05	8.66474e-05	RBM3
940	-8.66105e-05	8.66105e-05	DCXR
941	-8.6573e-05	8.6573e-05	ATP1B3
942	-8.6519e-05	8.6519e-05	PHYHIP
943	8.65005e-05	8.65005e-05	CEBPB
944	8.64876e-05	8.64876e-05	TBCD
945	8.64094e-05	8.64094e-05	GRAMD3
946	8.60331e-05	8.60331e-05	MKRN1
947	-8.60255e-05	8.60255e-05	MRPL16
948	-8.58437e-05	8.58437e-05	KHDRBS1
949	-8.58192e-05	8.58192e-05	STK25
950	-8.57693e-05	8.57693e-05	HSD17B7
951	8.5355e-05	8.5355e-05	ZNF331
952	-8.52439e-05	8.52439e-05	KLK7
953	8.51033e-05	8.51033e-05	PCGF2
954	8.45867e-05	8.45867e-05	NEDD4L
955	8.43936e-05	8.43936e-05	RIDA
956	8.43688e-05	8.43688e-05	RBM5
957	8.43369e-05	8.43369e-05	OPTN
958	-8.43054e-05	8.43054e-05	PCED1A
959	8.41994e-05	8.41994e-05	TXN
960	8.41474e-05	8.41474e-05	CNN3
961	-8.39648e-05	8.39648e-05	MYT1
962	8.39149e-05	8.39149e-05	RAPGEFL1
963	8.31934e-05	8.31934e-05	KIF21A
964	8.3042e-05	8.3042e-05	BBOX1
965	-8.30316e-05	8.30316e-05	PAIP2
966	8.29321e-05	8.29321e-05	MZF1
967	8.28817e-05	8.28817e-05	PICK1
968	8.28691e-05	8.28691e-05	RAPGEF2
969	8.28515e-05	8.28515e-05	NELFCD
970	8.26291e-05	8.26291e-05	STMN2
971	8.1994e-05	8.1994e-05	SLC35A5
972	-8.19401e-05	8.19401e-05	LAMP5
973	8.17288e-05	8.17288e-05	SNAPC4
974	8.17068e-05	8.17068e-05	ZNF14
975	-8.15894e-05	8.15894e-05	SPEG
976	8.15582e-05	8.15582e-05	SPRY2
977	8.15345e-05	8.15345e-05	WSB1
978	8.13295e-05	8.13295e-05	NAT14
979	8.11414e-05	8.11414e-05	SYT13
980	8.10643e-05	8.10643e-05	SMN1
981	-8.0826e-05	8.0826e-05	PSMC2
982	8.07364e-05	8.07364e-05	RPS12
983	8.06555e-05	8.06555e-05	CPLX1
984	8.06291e-05	8.06291e-05	QDPR
985	-8.06001e-05	8.06001e-05	ZFR
986	8.05551e-05	8.05551e-05	RB1CC1
987	-8.03552e-05	8.03552e-05	HPCA
988	-8.02496e-05	8.02496e-05	SERPINI1
989	8.016e-05	8.016e-05	GCA
990	8.00501e-05	8.00501e-05	EDC3
991	8.0043e-05	8.0043e-05	NEUROD2
992	8.00134e-05	8.00134e-05	C1QA
993	-7.97441e-05	7.97441e-05	HIST1H1C
994	7.94553e-05	7.94553e-05	CHPT1
995	7.94351e-05	7.94351e-05	HADHB
996	7.91386e-05	7.91386e-05	FAM98A
997	7.89739e-05	7.89739e-05	ZCCHC12
998	-7.88105e-05	7.88105e-05	SOX10
999	-7.86821e-05	7.86821e-05	STX8
1000	-7.85571e-05	7.85571e-05	ECHS1
1001	-7.83954e-05	7.83954e-05	RPH3A
1002	-7.80789e-05	7.80789e-05	NDUFV2
1003	7.80286e-05	7.80286e-05	CCT7
1004	-7.77832e-05	7.77832e-05	SLC13A4
1005	-7.77681e-05	7.77681e-05	NAB1
1006	-7.7656e-05	7.7656e-05	NDUFB1
1007	7.76166e-05	7.76166e-05	SCAMP4
1008	7.76037e-05	7.76037e-05	RABEPK
1009	-7.75402e-05	7.75402e-05	GINM1
1010	7.75119e-05	7.75119e-05	MUM1
1011	7.74439e-05	7.74439e-05	MOK
1012	-7.72348e-05	7.72348e-05	ASPHD1
1013	-7.70927e-05	7.70927e-05	ACTL6B
1014	7.7074e-05	7.7074e-05	ATP5E
1015	-7.6861e-05	7.6861e-05	NAA10
1016	-7.68543e-05	7.68543e-05	PBXIP1
1017	7.68077e-05	7.68077e-05	AVPI1
1018	-7.64226e-05	7.64226e-05	MUTYH
1019	-7.59292e-05	7.59292e-05	ID2
1020	-7.59286e-05	7.59286e-05	DPH7
1021	-7.57448e-05	7.57448e-05	RAB5B
1022	7.56906e-05	7.56906e-05	N4BP1
1023	7.56831e-05	7.56831e-05	MSRB3
1024	7.56114e-05	7.56114e-05	ROGDI
1025	7.55723e-05	7.55723e-05	ITPKA
1026	-7.54127e-05	7.54127e-05	CEP19
1027	-7.53789e-05	7.53789e-05	CD9
1028	7.53457e-05	7.53457e-05	TCEA1
1029	7.50609e-05	7.50609e-05	DLGAP2
1030	7.49211e-05	7.49211e-05	PLCB1
1031	7.48526e-05	7.48526e-05	MICU1
1032	-7.48246e-05	7.48246e-05	DSTN
1033	7.47905e-05	7.47905e-05	CLNS1A
1034	-7.47899e-05	7.47899e-05	PABPC1
1035	7.46827e-05	7.46827e-05	PKD1
1036	7.45209e-05	7.45209e-05	GOLGA3
1037	-7.44067e-05	7.44067e-05	TLN2
1038	7.43817e-05	7.43817e-05	HDHD2
1039	-7.41641e-05	7.41641e-05	TF
1040	-7.3891e-05	7.3891e-05	RGPD4
1041	-7.38211e-05	7.38211e-05	CDK9
1042	-7.37405e-05	7.37405e-05	CHKB
1043	-7.35781e-05	7.35781e-05	H2AFZ
1044	-7.33704e-05	7.33704e-05	BTF3
1045	7.32309e-05	7.32309e-05	PITPNB
1046	-7.31787e-05	7.31787e-05	MAT2A
1047	7.30409e-05	7.30409e-05	DYNLT3
1048	-7.30319e-05	7.30319e-05	C10orf35
1049	7.30236e-05	7.30236e-05	IL4R
1050	7.28814e-05	7.28814e-05	NDRG1
1051	7.28303e-05	7.28303e-05	ADORA1
1052	7.27686e-05	7.27686e-05	SPARC
1053	-7.26985e-05	7.26985e-05	SULT4A1
1054	-7.26741e-05	7.26741e-05	DUSP19
1055	-7.26661e-05	7.26661e-05	NDUFA12
1056	-7.25942e-05	7.25942e-05	CRY2
1057	7.25197e-05	7.25197e-05	SORCS1
1058	-7.23584e-05	7.23584e-05	FOXO1
1059	-7.21566e-05	7.21566e-05	TNS3
1060	-7.20703e-05	7.20703e-05	UBQLN2
1061	-7.19535e-05	7.19535e-05	RASD1
1062	7.195e-05	7.195e-05	ILK
1063	7.16939e-05	7.16939e-05	PNMAL1
1064	7.16614e-05	7.16614e-05	PRDX1
1065	7.16368e-05	7.16368e-05	ACSBG1
1066	7.1531e-05	7.1531e-05	MEAF6
1067	7.13992e-05	7.13992e-05	LINGO1
1068	-7.12133e-05	7.12133e-05	RPS2
1069	7.08649e-05	7.08649e-05	TFIP11
1070	-7.06275e-05	7.06275e-05	ATOH8
1071	7.00574e-05	7.00574e-05	CGNL1
1072	7.0026e-05	7.0026e-05	MICAL3
1073	-7.00129e-05	7.00129e-05	SST
1074	6.98862e-05	6.98862e-05	NQO1
1075	6.97729e-05	6.97729e-05	SCGB2A2
1076	-6.9728e-05	6.9728e-05	NINL
1077	6.96669e-05	6.96669e-05	PPM1F
1078	6.95595e-05	6.95595e-05	TMSB15B
1079	6.95351e-05	6.95351e-05	TAP1
1080	6.93842e-05	6.93842e-05	CLN6
1081	-6.93835e-05	6.93835e-05	ZNF664
1082	6.93365e-05	6.93365e-05	MAP4K2
1083	6.92981e-05	6.92981e-05	FNBP1
1084	6.92406e-05	6.92406e-05	SMARCA4
1085	6.90748e-05	6.90748e-05	GADD45A
1086	6.90063e-05	6.90063e-05	CTSB
1087	-6.89711e-05	6.89711e-05	PAGR1
1088	6.88446e-05	6.88446e-05	RAB5A
1089	6.88041e-05	6.88041e-05	WIPF1
1090	6.87971e-05	6.87971e-05	RHOA
1091	6.87097e-05	6.87097e-05	FEM1C
1092	-6.861e-05	6.861e-05	PRKCZ
1093	6.83182e-05	6.83182e-05	SCOC
1094	6.82739e-05	6.82739e-05	GYG1
1095	-6.79215e-05	6.79215e-05	GSTP1
1096	-6.79107e-05	6.79107e-05	INA
1097	6.77369e-05	6.77369e-05	SPRYD3
1098	6.75628e-05	6.75628e-05	SMPD4
1099	6.74611e-05	6.74611e-05	FAM49B
1100	6.7301e-05	6.7301e-05	CABIN1
1101	-6.72578e-05	6.72578e-05	TCF25
1102	-6.71976e-05	6.71976e-05	EMID1
1103	-6.7071e-05	6.7071e-05	UBL5
1104	6.68554e-05	6.68554e-05	RAD21
1105	-6.68528e-05	6.68528e-05	C19orf43
1106	-6.68311e-05	6.68311e-05	SRSF11
1107	6.6737e-05	6.6737e-05	EIF2B4
1108	-6.66506e-05	6.66506e-05	FXR1
1109	6.66375e-05	6.66375e-05	MRGBP
1110	-6.65836e-05	6.65836e-05	GATM
1111	-6.65575e-05	6.65575e-05	ATG12
1112	6.65431e-05	6.65431e-05	CAB39
1113	6.64359e-05	6.64359e-05	VAMP2
1114	6.63528e-05	6.63528e-05	FAM69B
1115	6.63301e-05	6.63301e-05	SDHD
1116	6.60842e-05	6.60842e-05	ZNF33A
1117	-6.60775e-05	6.60775e-05	HMP19
1118	6.60769e-05	6.60769e-05	CBLN1
1119	-6.60429e-05	6.60429e-05	RASEF
1120	6.58851e-05	6.58851e-05	AHR
1121	-6.58733e-05	6.58733e-05	FAM107B
1122	6.58706e-05	6.58706e-05	POLK
1123	6.57279e-05	6.57279e-05	CTNNA1
1124	6.57254e-05	6.57254e-05	AP1S2
1125	6.5657e-05	6.5657e-05	CLCNKA
1126	6.56474e-05	6.56474e-05	MYL6B
1127	-6.56466e-05	6.56466e-05	PRKRIP1
1128	-6.52673e-05	6.52673e-05	RNASET2
1129	6.5242e-05	6.5242e-05	CYB5B
1130	-6.52101e-05	6.52101e-05	ABCC8
1131	6.51915e-05	6.51915e-05	MRPS6
1132	6.49887e-05	6.49887e-05	C8orf46
1133	6.48329e-05	6.48329e-05	COASY
1134	6.46716e-05	6.46716e-05	SAP30
1135	-6.45865e-05	6.45865e-05	GRIN2C
1136	6.45088e-05	6.45088e-05	NCALD
1137	6.44631e-05	6.44631e-05	FAM110B
1138	-6.43334e-05	6.43334e-05	ZNF430
1139	-6.42597e-05	6.42597e-05	VPS35
1140	-6.41246e-05	6.41246e-05	ERGIC3
1141	6.40906e-05	6.40906e-05	CIC
1142	-6.4046e-05	6.4046e-05	SYNM
1143	6.40243e-05	6.40243e-05	SCG2
1144	-6.39376e-05	6.39376e-05	SAR1A
1145	6.39165e-05	6.39165e-05	HNRNPM
1146	6.38486e-05	6.38486e-05	COMMD7
1147	6.3843e-05	6.3843e-05	TIMM22
1148	6.38291e-05	6.38291e-05	TUBA1C
1149	-6.37971e-05	6.37971e-05	MAP3K12
1150	6.37085e-05	6.37085e-05	JARID2
1151	6.36684e-05	6.36684e-05	FAM134A
1152	-6.35816e-05	6.35816e-05	BBX
1153	6.358e-05	6.358e-05	RSAD2
1154	-6.35643e-05	6.35643e-05	UCKL1
1155	-6.34764e-05	6.34764e-05	C16orf45
1156	-6.34763e-05	6.34763e-05	DDR1
1157	-6.34058e-05	6.34058e-05	MID1IP1
1158	-6.33525e-05	6.33525e-05	FHL1
1159	6.33511e-05	6.33511e-05	CSRP2
1160	6.31476e-05	6.31476e-05	N4BP2L1
1161	-6.31235e-05	6.31235e-05	VASP
1162	-6.3028e-05	6.3028e-05	RNF112
1163	-6.29348e-05	6.29348e-05	UQCRH
1164	6.29239e-05	6.29239e-05	RRAGA
1165	6.29089e-05	6.29089e-05	BRSK2
1166	-6.28994e-05	6.28994e-05	ATP6V1D
1167	-6.28719e-05	6.28719e-05	INTS3
1168	-6.28653e-05	6.28653e-05	PTDSS2
1169	-6.28125e-05	6.28125e-05	RYBP
1170	6.27977e-05	6.27977e-05	FAM134B
1171	6.27512e-05	6.27512e-05	ELMOD3
1172	-6.26852e-05	6.26852e-05	SLC2A8
1173	6.26595e-05	6.26595e-05	CAMKK2
1174	6.25885e-05	6.25885e-05	SSB
1175	-6.23783e-05	6.23783e-05	KCNH3
1176	-6.237e-05	6.237e-05	SEC14L2
1177	6.23696e-05	6.23696e-05	TADA3
1178	6.23672e-05	6.23672e-05	HSPD1
1179	6.2356e-05	6.2356e-05	SYNPR
1180	6.19574e-05	6.19574e-05	PCBP4
1181	6.16626e-05	6.16626e-05	GNAO1
1182	6.1654e-05	6.1654e-05	GMFB
1183	-6.14004e-05	6.14004e-05	DNM1
1184	6.13721e-05	6.13721e-05	ELAVL3
1185	6.12684e-05	6.12684e-05	GPRASP2
1186	-6.12565e-05	6.12565e-05	VARS2
1187	6.12203e-05	6.12203e-05	FOSB
1188	6.11162e-05	6.11162e-05	HSDL2
1189	-6.09755e-05	6.09755e-05	CD99
1190	-6.0868e-05	6.0868e-05	PQLC1
1191	6.08515e-05	6.08515e-05	FRG1
1192	6.07579e-05	6.07579e-05	GOLGA7
1193	-6.07225e-05	6.07225e-05	SRP72
1194	-6.0613e-05	6.0613e-05	SIRT6
1195	-6.06008e-05	6.06008e-05	TRIB2
1196	-6.05719e-05	6.05719e-05	ALDH7A1
1197	6.05526e-05	6.05526e-05	SH2D2A
1198	-6.02808e-05	6.02808e-05	IQGAP1
1199	6.02708e-05	6.02708e-05	HOPX
1200	-6.02614e-05	6.02614e-05	C9orf142
1201	6.00708e-05	6.00708e-05	TOMM20
1202	6.00397e-05	6.00397e-05	AGT
1203	5.99765e-05	5.99765e-05	AKTIP
1204	-5.99539e-05	5.99539e-05	CIT
1205	5.99277e-05	5.99277e-05	PGRMC2
1206	5.99165e-05	5.99165e-05	ALPP
1207	5.98555e-05	5.98555e-05	POLR2G
1208	5.98191e-05	5.98191e-05	AEBP1
1209	-5.97681e-05	5.97681e-05	ANKRD24
1210	-5.97595e-05	5.97595e-05	RBBP7
1211	-5.96994e-05	5.96994e-05	PRPF6
1212	-5.96629e-05	5.96629e-05	CD74
1213	-5.9644e-05	5.9644e-05	MRPL37
1214	-5.95509e-05	5.95509e-05	PARP1
1215	-5.95383e-05	5.95383e-05	TMEM55B
1216	5.9535e-05	5.9535e-05	SNX19
1217	5.94598e-05	5.94598e-05	ZFHX2
1218	5.94402e-05	5.94402e-05	ARRDC4
1219	-5.94298e-05	5.94298e-05	SKIV2L
1220	-5.94008e-05	5.94008e-05	SEMA3E
1221	-5.91696e-05	5.91696e-05	RPS5
1222	5.91304e-05	5.91304e-05	SLCO2B1
1223	5.91289e-05	5.91289e-05	TMEM126B
1224	-5.90939e-05	5.90939e-05	HHATL
1225	-5.90489e-05	5.90489e-05	IL17D
1226	-5.9046e-05	5.9046e-05	DAPK1
1227	5.89536e-05	5.89536e-05	ATP1A1
1228	-5.89172e-05	5.89172e-05	RPS6KA4
1229	-5.8897e-05	5.8897e-05	SLC25A3
1230	5.88918e-05	5.88918e-05	LRIG1
1231	5.86932e-05	5.86932e-05	SLN
1232	5.86642e-05	5.86642e-05	A2M
1233	5.85916e-05	5.85916e-05	DOK4
1234	-5.85612e-05	5.85612e-05	PNISR
1235	5.85443e-05	5.85443e-05	BTBD6
1236	-5.85176e-05	5.85176e-05	NECAP1
1237	-5.84977e-05	5.84977e-05	MRPS5
1238	5.84569e-05	5.84569e-05	EDC4
1239	-5.84481e-05	5.84481e-05	PTPN4
1240	-5.82864e-05	5.82864e-05	ARPC5L
1241	-5.81664e-05	5.81664e-05	PIN1
1242	-5.79919e-05	5.79919e-05	PRDX5
1243	5.79623e-05	5.79623e-05	USP20
1244	5.79151e-05	5.79151e-05	RPS17
1245	5.78167e-05	5.78167e-05	MBP
1246	-5.7796e-05	5.7796e-05	BLOC1S2
1247	5.7779e-05	5.7779e-05	SOX9
1248	5.77369e-05	5.77369e-05	XPNPEP3
1249	-5.77162e-05	5.77162e-05	LRRC8A
1250	5.76651e-05	5.76651e-05	YWHAZ
1251	-5.76353e-05	5.76353e-05	HLA-DPA1
1252	-5.76246e-05	5.76246e-05	RPS13
1253	-5.75494e-05	5.75494e-05	VPS41
1254	-5.75421e-05	5.75421e-05	ADAM19
1255	-5.74974e-05	5.74974e-05	FKBP1B
1256	-5.74359e-05	5.74359e-05	RPL7A
1257	5.73716e-05	5.73716e-05	KDM4B
1258	-5.72917e-05	5.72917e-05	FAM120B
1259	5.72554e-05	5.72554e-05	CUTA
1260	-5.7092e-05	5.7092e-05	GPR155
1261	5.70151e-05	5.70151e-05	FUS
1262	5.69623e-05	5.69623e-05	AP3S1
1263	-5.68352e-05	5.68352e-05	LMNB2
1264	-5.6708e-05	5.6708e-05	SEPP1
1265	5.65761e-05	5.65761e-05	TOP2B
1266	-5.65727e-05	5.65727e-05	PPME1
1267	-5.65693e-05	5.65693e-05	MORN1
1268	-5.64171e-05	5.64171e-05	LYSMD2
1269	-5.62123e-05	5.62123e-05	NME3
1270	5.61672e-05	5.61672e-05	KLHL2
1271	5.60371e-05	5.60371e-05	ROR1
1272	-5.60303e-05	5.60303e-05	DENND5A
1273	5.60113e-05	5.60113e-05	SNRNP25
1274	-5.57477e-05	5.57477e-05	DERA
1275	5.56706e-05	5.56706e-05	HSPB1
1276	5.56706e-05	5.56706e-05	CDC25B
1277	-5.55947e-05	5.55947e-05	FLRT2
1278	-5.55692e-05	5.55692e-05	PPIE
1279	5.5487e-05	5.5487e-05	C1QC
1280	5.54605e-05	5.54605e-05	TRA2A
1281	-5.54596e-05	5.54596e-05	EFHD2
1282	-5.54271e-05	5.54271e-05	BBS2
1283	-5.54142e-05	5.54142e-05	FLOT1
1284	-5.53815e-05	5.53815e-05	B4GAT1
1285	5.53427e-05	5.53427e-05	FA2H
1286	-5.53386e-05	5.53386e-05	PPARGC1A
1287	5.52946e-05	5.52946e-05	PPP1R16A
1288	-5.52365e-05	5.52365e-05	POLR2L
1289	5.52028e-05	5.52028e-05	CTDSP2
1290	-5.51908e-05	5.51908e-05	ACER3
1291	-5.51804e-05	5.51804e-05	MOAP1
1292	5.51744e-05	5.51744e-05	NFIB
1293	-5.50051e-05	5.50051e-05	TJP1
1294	5.49019e-05	5.49019e-05	SREBF2
1295	5.48951e-05	5.48951e-05	IPCEF1
1296	-5.48515e-05	5.48515e-05	HSP90AA1
1297	5.46669e-05	5.46669e-05	TP53BP2
1298	-5.46523e-05	5.46523e-05	PLOD1
1299	-5.44546e-05	5.44546e-05	TBCB
1300	5.42206e-05	5.42206e-05	AUTS2
1301	5.41293e-05	5.41293e-05	TMEM256
1302	5.4105e-05	5.4105e-05	CYSTM1
1303	-5.40332e-05	5.40332e-05	KLHL28
1304	5.39507e-05	5.39507e-05	SPEN
1305	-5.38131e-05	5.38131e-05	UBL3
1306	-5.38047e-05	5.38047e-05	PDHX
1307	-5.36524e-05	5.36524e-05	ITPR1
1308	-5.36042e-05	5.36042e-05	VIPR1
1309	-5.36022e-05	5.36022e-05	PGM2L1
1310	-5.34336e-05	5.34336e-05	SUGT1
1311	5.34071e-05	5.34071e-05	KLHL8
1312	-5.33938e-05	5.33938e-05	COPE
1313	5.33329e-05	5.33329e-05	ZNF248
1314	-5.32586e-05	5.32586e-05	SOWAHA
1315	5.32403e-05	5.32403e-05	PITPNM1
1316	-5.32312e-05	5.32312e-05	MRPS21
1317	5.32285e-05	5.32285e-05	GRSF1
1318	-5.31824e-05	5.31824e-05	SNCG
1319	-5.31032e-05	5.31032e-05	CTGF
1320	-5.3042e-05	5.3042e-05	CAPN1
1321	5.30116e-05	5.30116e-05	PTS
1322	5.29558e-05	5.29558e-05	GLUD2
1323	5.29376e-05	5.29376e-05	NXF1
1324	5.28531e-05	5.28531e-05	ZDHHC2
1325	-5.28252e-05	5.28252e-05	WBP1
1326	-5.27475e-05	5.27475e-05	POLD2
1327	-5.27323e-05	5.27323e-05	COL7A1
1328	5.27068e-05	5.27068e-05	PCNX2
1329	5.26874e-05	5.26874e-05	NDRG3
1330	5.25652e-05	5.25652e-05	NRSN1
1331	-5.25575e-05	5.25575e-05	MEGF10
1332	5.25465e-05	5.25465e-05	PSMC1
1333	5.25304e-05	5.25304e-05	DNAJB1
1334	5.25147e-05	5.25147e-05	ISCA1
1335	5.24865e-05	5.24865e-05	TMSB10
1336	-5.24153e-05	5.24153e-05	CDK10
1337	5.23002e-05	5.23002e-05	OGT
1338	-5.22922e-05	5.22922e-05	SUPT5H
1339	5.22255e-05	5.22255e-05	RPL36
1340	5.21938e-05	5.21938e-05	BAG6
1341	-5.21606e-05	5.21606e-05	POU3F2
1342	5.20816e-05	5.20816e-05	FLNA
1343	5.1921e-05	5.1921e-05	PAMR1
1344	-5.19203e-05	5.19203e-05	ATP5C1
1345	-5.1886e-05	5.1886e-05	XRCC6
1346	-5.18732e-05	5.18732e-05	MPP2
1347	-5.17249e-05	5.17249e-05	MAP2K1
1348	5.17176e-05	5.17176e-05	VBP1
1349	-5.17051e-05	5.17051e-05	MARS
1350	5.17024e-05	5.17024e-05	TIMM10
1351	-5.15659e-05	5.15659e-05	RPN2
1352	5.15402e-05	5.15402e-05	EGR1
1353	5.15188e-05	5.15188e-05	PFDN2
1354	-5.14036e-05	5.14036e-05	CAMK2A
1355	-5.13611e-05	5.13611e-05	LRRN3
1356	-5.12416e-05	5.12416e-05	MFF
1357	5.1233e-05	5.1233e-05	PHKA2
1358	-5.09862e-05	5.09862e-05	NAPRT
1359	5.08678e-05	5.08678e-05	PDHB
1360	-5.0866e-05	5.0866e-05	RPS9
1361	-5.084e-05	5.084e-05	ARHGEF9
1362	-5.07958e-05	5.07958e-05	C14orf166
1363	-5.07899e-05	5.07899e-05	ADD1
1364	-5.07671e-05	5.07671e-05	BHLHE40
1365	-5.07653e-05	5.07653e-05	TRAPPC3
1366	5.06635e-05	5.06635e-05	RSAD1
1367	-5.06423e-05	5.06423e-05	TROVE2
1368	5.05842e-05	5.05842e-05	LRP1
1369	5.05425e-05	5.05425e-05	RNF40
1370	5.05102e-05	5.05102e-05	RPL7
1371	5.05006e-05	5.05006e-05	ACAT1
1372	5.04764e-05	5.04764e-05	PEX6
1373	5.03882e-05	5.03882e-05	RSPRY1
1374	-5.03846e-05	5.03846e-05	ARHGAP1
1375	-5.02688e-05	5.02688e-05	PAPSS1
1376	-5.0096e-05	5.0096e-05	ATP6V0E1
1377	4.99603e-05	4.99603e-05	EMC9
1378	4.98205e-05	4.98205e-05	OGDHL
1379	-4.97903e-05	4.97903e-05	BARHL1
1380	4.97354e-05	4.97354e-05	KIFAP3
1381	-4.97338e-05	4.97338e-05	POMGNT1
1382	4.97203e-05	4.97203e-05	EXPH5
1383	4.96357e-05	4.96357e-05	HSBP1
1384	-4.9628e-05	4.9628e-05	SNURF
1385	4.95716e-05	4.95716e-05	BAG3
1386	-4.95416e-05	4.95416e-05	PLEKHA1
1387	-4.94721e-05	4.94721e-05	RHOG
1388	-4.94511e-05	4.94511e-05	HSPA8
1389	-4.94298e-05	4.94298e-05	C9orf78
1390	4.94279e-05	4.94279e-05	GATS
1391	-4.93328e-05	4.93328e-05	MTUS1
1392	4.93316e-05	4.93316e-05	APC2
1393	-4.93112e-05	4.93112e-05	CLTC
1394	4.92685e-05	4.92685e-05	JPH4
1395	-4.92521e-05	4.92521e-05	GLRB
1396	4.91782e-05	4.91782e-05	ADAMTS18
1397	4.91702e-05	4.91702e-05	LMBRD1
1398	4.91584e-05	4.91584e-05	OLIG2
1399	-4.91428e-05	4.91428e-05	AMZ2
1400	4.90377e-05	4.90377e-05	ZNF264
1401	-4.9002e-05	4.9002e-05	ST6GALNAC6
1402	-4.8946e-05	4.8946e-05	FAM160B2
1403	-4.89427e-05	4.89427e-05	BZW1
1404	4.89134e-05	4.89134e-05	MSN
1405	4.88807e-05	4.88807e-05	CMIP
1406	4.8876e-05	4.8876e-05	SRI
1407	4.88563e-05	4.88563e-05	ZBTB16
1408	-4.86626e-05	4.86626e-05	PRKCG
1409	-4.86504e-05	4.86504e-05	RPL13A
1410	-4.8597e-05	4.8597e-05	RIMS3
1411	-4.85495e-05	4.85495e-05	MYO10
1412	4.85261e-05	4.85261e-05	OSBPL1A
1413	4.85111e-05	4.85111e-05	MARCKSL1
1414	4.84926e-05	4.84926e-05	ADH5
1415	-4.8377e-05	4.8377e-05	SSR2
1416	-4.83642e-05	4.83642e-05	SS18L2
1417	-4.83284e-05	4.83284e-05	RPS4Y1
1418	4.83001e-05	4.83001e-05	MSRB2
1419	4.82891e-05	4.82891e-05	CKMT1B
1420	-4.82837e-05	4.82837e-05	MBOAT7
1421	-4.82712e-05	4.82712e-05	AP3B2
1422	4.81404e-05	4.81404e-05	CADM3
1423	-4.80235e-05	4.80235e-05	DDX17
1424	4.80068e-05	4.80068e-05	RUBCN
1425	-4.79345e-05	4.79345e-05	LRP3
1426	-4.79302e-05	4.79302e-05	FEM1A
1427	4.78978e-05	4.78978e-05	HNRNPR
1428	-4.78887e-05	4.78887e-05	SLC25A5
1429	4.7859e-05	4.7859e-05	PRICKLE4
1430	4.77404e-05	4.77404e-05	ABCC5
1431	-4.76808e-05	4.76808e-05	RNF144A
1432	4.76783e-05	4.76783e-05	MYPOP
1433	-4.75826e-05	4.75826e-05	EFCAB14
1434	-4.7515e-05	4.7515e-05	DDX5
1435	-4.74707e-05	4.74707e-05	XRCC2
1436	-4.74279e-05	4.74279e-05	IDO2
1437	4.74036e-05	4.74036e-05	HLA-C
1438	4.73872e-05	4.73872e-05	MGST1
1439	-4.73737e-05	4.73737e-05	SLC25A11
1440	4.73608e-05	4.73608e-05	SATB2
1441	4.73541e-05	4.73541e-05	LRFN4
1442	-4.7338e-05	4.7338e-05	GPI
1443	-4.73316e-05	4.73316e-05	AHSA1
1444	-4.719e-05	4.719e-05	ADI1
1445	-4.7126e-05	4.7126e-05	SLC30A9
1446	4.7119e-05	4.7119e-05	WLS
1447	-4.69811e-05	4.69811e-05	CETN2
1448	-4.69781e-05	4.69781e-05	DNAJA4
1449	-4.69106e-05	4.69106e-05	RAB11FIP4
1450	-4.68758e-05	4.68758e-05	SASH1
1451	4.68613e-05	4.68613e-05	ZNHIT3
1452	4.68382e-05	4.68382e-05	BEX3
1453	4.67002e-05	4.67002e-05	ISYNA1
1454	-4.66856e-05	4.66856e-05	SULT1A1
1455	4.66705e-05	4.66705e-05	URGCP
1456	4.65853e-05	4.65853e-05	ZNF577
1457	-4.65074e-05	4.65074e-05	FAAP100
1458	-4.64961e-05	4.64961e-05	ANKRD9
1459	4.64551e-05	4.64551e-05	VDAC2
1460	4.64154e-05	4.64154e-05	RBFOX2
1461	4.63894e-05	4.63894e-05	PIK3IP1
1462	-4.62412e-05	4.62412e-05	NDUFS3
1463	4.61714e-05	4.61714e-05	DPYSL3
1464	4.61273e-05	4.61273e-05	PSMB5
1465	-4.61181e-05	4.61181e-05	TARBP2
1466	-4.61171e-05	4.61171e-05	SEC61G
1467	-4.60708e-05	4.60708e-05	ATRX
1468	-4.60307e-05	4.60307e-05	TAX1BP1
1469	4.59995e-05	4.59995e-05	KIDINS220
1470	-4.59955e-05	4.59955e-05	ARHGEF3
1471	-4.59371e-05	4.59371e-05	PGM1
1472	-4.58893e-05	4.58893e-05	TRIP6
1473	-4.5862e-05	4.5862e-05	COPS8
1474	4.58442e-05	4.58442e-05	DGKZ
1475	-4.58432e-05	4.58432e-05	FAM213B
1476	4.57967e-05	4.57967e-05	CHTF18
1477	-4.56388e-05	4.56388e-05	CHST10
1478	4.55995e-05	4.55995e-05	DGCR2
1479	4.55803e-05	4.55803e-05	ADAR
1480	4.55666e-05	4.55666e-05	UQCRQ
1481	4.54887e-05	4.54887e-05	ALOX5
1482	4.54856e-05	4.54856e-05	CYP1B1
1483	4.54764e-05	4.54764e-05	DGKG
1484	4.54084e-05	4.54084e-05	PLCL2
1485	-4.53674e-05	4.53674e-05	CPSF1
1486	4.53339e-05	4.53339e-05	FSTL1
1487	4.51797e-05	4.51797e-05	ANOS1
1488	4.5153e-05	4.5153e-05	TMEM246
1489	-4.5106e-05	4.5106e-05	SNX3
1490	4.50916e-05	4.50916e-05	RNF208
1491	-4.49889e-05	4.49889e-05	SAMD14
1492	4.47803e-05	4.47803e-05	MED25
1493	4.47771e-05	4.47771e-05	METTL2A
1494	4.47456e-05	4.47456e-05	GNB1
1495	4.47222e-05	4.47222e-05	CCDC14
1496	-4.46826e-05	4.46826e-05	AFF1
1497	4.46749e-05	4.46749e-05	GOSR1
1498	4.45821e-05	4.45821e-05	TMEM165
1499	-4.45343e-05	4.45343e-05	LMF2
1500	-4.4466e-05	4.4466e-05	MRPS23
1501	4.44099e-05	4.44099e-05	ASXL1
1502	4.43838e-05	4.43838e-05	ADGRL1
1503	-4.43342e-05	4.43342e-05	PDGFRB
1504	-4.43273e-05	4.43273e-05	CHST12
1505	4.42909e-05	4.42909e-05	LIPA
1506	-4.41202e-05	4.41202e-05	CAMK2G
1507	4.4111e-05	4.4111e-05	IFI27L2
1508	4.40679e-05	4.40679e-05	ATP5D
1509	4.40601e-05	4.40601e-05	SART1
1510	4.40042e-05	4.40042e-05	SULF2
1511	-4.39243e-05	4.39243e-05	SLC26A4
1512	4.39235e-05	4.39235e-05	DDX39A
1513	4.39102e-05	4.39102e-05	SNRNP200
1514	-4.3872e-05	4.3872e-05	KLHL17
1515	-4.38603e-05	4.38603e-05	PRKRA
1516	4.38242e-05	4.38242e-05	CA4
1517	-4.36908e-05	4.36908e-05	PHF24
1518	-4.36864e-05	4.36864e-05	ESPNL
1519	4.36318e-05	4.36318e-05	CD93
1520	-4.35255e-05	4.35255e-05	DDIT4L
1521	4.35245e-05	4.35245e-05	PDRG1
1522	4.34599e-05	4.34599e-05	TMEM14A
1523	-4.34568e-05	4.34568e-05	CCDC53
1524	4.34435e-05	4.34435e-05	SDCCAG3
1525	-4.33086e-05	4.33086e-05	CYHR1
1526	-4.31938e-05	4.31938e-05	LGI1
1527	4.31744e-05	4.31744e-05	TAOK2
1528	-4.31391e-05	4.31391e-05	ARSG
1529	-4.30418e-05	4.30418e-05	PPP2CA
1530	4.30057e-05	4.30057e-05	ANXA5
1531	-4.30047e-05	4.30047e-05	METRN
1532	-4.3003e-05	4.3003e-05	CDC5L
1533	4.29583e-05	4.29583e-05	CEPT1
1534	-4.29461e-05	4.29461e-05	MRPL24
1535	-4.2933e-05	4.2933e-05	LDLRAP1
1536	-4.29248e-05	4.29248e-05	TMBIM4
1537	-4.29045e-05	4.29045e-05	EIF4G3
1538	4.27124e-05	4.27124e-05	SCHIP1
1539	4.25991e-05	4.25991e-05	GAK
1540	4.25808e-05	4.25808e-05	CPTP
1541	-4.25093e-05	4.25093e-05	SMG1
1542	-4.23969e-05	4.23969e-05	HLA-E
1543	-4.23653e-05	4.23653e-05	SPATC1L
1544	-4.23527e-05	4.23527e-05	TRO
1545	-4.23304e-05	4.23304e-05	PDPR
1546	-4.233e-05	4.233e-05	GADD45B
1547	4.22902e-05	4.22902e-05	GALC
1548	-4.22243e-05	4.22243e-05	DDOST
1549	4.21373e-05	4.21373e-05	DYNC1I2
1550	4.20794e-05	4.20794e-05	ASAP3
1551	4.20744e-05	4.20744e-05	PSMD1
1552	-4.2053e-05	4.2053e-05	AP2B1
1553	4.19462e-05	4.19462e-05	GNB3
1554	4.18458e-05	4.18458e-05	MANF
1555	4.18346e-05	4.18346e-05	RBM4
1556	4.18024e-05	4.18024e-05	FAM46A
1557	4.17943e-05	4.17943e-05	CD83
1558	-4.15591e-05	4.15591e-05	NYNRIN
1559	-4.15512e-05	4.15512e-05	MFGE8
1560	-4.15489e-05	4.15489e-05	ESD
1561	-4.1495e-05	4.1495e-05	CYFIP2
1562	4.14473e-05	4.14473e-05	CXXC4
1563	-4.14268e-05	4.14268e-05	FAM171A1
1564	4.14192e-05	4.14192e-05	SLC5A7
1565	-4.14091e-05	4.14091e-05	PAK6
1566	-4.13954e-05	4.13954e-05	DUSP5
1567	-4.1376e-05	4.1376e-05	TCEAL1
1568	-4.13417e-05	4.13417e-05	ARHGEF2
1569	4.13148e-05	4.13148e-05	CNTN2
1570	-4.13108e-05	4.13108e-05	CSF1R
1571	-4.12813e-05	4.12813e-05	EXOC7
1572	-4.12465e-05	4.12465e-05	ZSCAN18
1573	4.12251e-05	4.12251e-05	GAS7
1574	-4.12215e-05	4.12215e-05	NDUFA13
1575	-4.11996e-05	4.11996e-05	FAM177A1
1576	-4.11861e-05	4.11861e-05	CRLF1
1577	-4.11288e-05	4.11288e-05	OTUB1
1578	4.11115e-05	4.11115e-05	CCSER2
1579	-4.10648e-05	4.10648e-05	DDX11
1580	-4.10506e-05	4.10506e-05	BCAP31
1581	4.10328e-05	4.10328e-05	ARPC5
1582	-4.1012e-05	4.1012e-05	DAGLB
1583	-4.09495e-05	4.09495e-05	EIF5A2
1584	4.08244e-05	4.08244e-05	BRD2
1585	4.0818e-05	4.0818e-05	IFIT2
1586	-4.08157e-05	4.08157e-05	ZNF419
1587	4.07056e-05	4.07056e-05	CLDN5
1588	4.06558e-05	4.06558e-05	STMN4
1589	-4.05905e-05	4.05905e-05	GLS
1590	-4.05217e-05	4.05217e-05	TRA2B
1591	4.05094e-05	4.05094e-05	DLG5
1592	4.04754e-05	4.04754e-05	SEL1L3
1593	-4.04735e-05	4.04735e-05	G3BP1
1594	4.02777e-05	4.02777e-05	ARHGEF6
1595	4.02286e-05	4.02286e-05	HYI
1596	-4.02196e-05	4.02196e-05	PRRG1
1597	-4.02055e-05	4.02055e-05	KCNF1
1598	4.01641e-05	4.01641e-05	ANAPC5
1599	4.01393e-05	4.01393e-05	BACE1
1600	-4.00972e-05	4.00972e-05	ERMP1
1601	-4.00436e-05	4.00436e-05	SEC16A
1602	4.004e-05	4.004e-05	TP53INP2
1603	-4.00373e-05	4.00373e-05	ULK1
1604	3.99851e-05	3.99851e-05	GNG7
1605	-3.99694e-05	3.99694e-05	PDCD7
1606	3.99003e-05	3.99003e-05	PTPRO
1607	3.98969e-05	3.98969e-05	RPS16
1608	-3.98447e-05	3.98447e-05	FOXN2
1609	-3.97863e-05	3.97863e-05	RAB24
1610	3.97327e-05	3.97327e-05	NOS1AP
1611	3.97053e-05	3.97053e-05	PRKACB
1612	3.9682e-05	3.9682e-05	LSS
1613	-3.96389e-05	3.96389e-05	GOLPH3
1614	-3.95992e-05	3.95992e-05	DAPP1
1615	3.95726e-05	3.95726e-05	ETFDH
1616	-3.95489e-05	3.95489e-05	DPY30
1617	3.93409e-05	3.93409e-05	EMSY
1618	-3.93295e-05	3.93295e-05	NDUFS2
1619	-3.93164e-05	3.93164e-05	NDUFC1
1620	3.9299e-05	3.9299e-05	P4HB
1621	3.92635e-05	3.92635e-05	ETFA
1622	3.92165e-05	3.92165e-05	NPRL2
1623	-3.9199e-05	3.9199e-05	CUEDC1
1624	3.91962e-05	3.91962e-05	SELM
1625	-3.91663e-05	3.91663e-05	MLLT1
1626	3.90934e-05	3.90934e-05	PSMD6
1627	3.90581e-05	3.90581e-05	PMP22
1628	-3.90256e-05	3.90256e-05	AP2A2
1629	-3.87502e-05	3.87502e-05	MFSD14A
1630	-3.87447e-05	3.87447e-05	WBP2
1631	3.87241e-05	3.87241e-05	ATG10
1632	-3.87066e-05	3.87066e-05	CRELD1
1633	3.86726e-05	3.86726e-05	KIF22
1634	3.86036e-05	3.86036e-05	YPEL4
1635	3.86019e-05	3.86019e-05	ATOX1
1636	3.85351e-05	3.85351e-05	RPF2
1637	3.8521e-05	3.8521e-05	STS
1638	3.83803e-05	3.83803e-05	TMCO1
1639	3.83783e-05	3.83783e-05	CHSY1
1640	3.83658e-05	3.83658e-05	TYRO3
1641	-3.83637e-05	3.83637e-05	SNRNP27
1642	3.83574e-05	3.83574e-05	PCYT2
1643	3.83493e-05	3.83493e-05	SLITRK2
1644	3.83225e-05	3.83225e-05	ESYT1
1645	3.83199e-05	3.83199e-05	PRPF8
1646	-3.82773e-05	3.82773e-05	UQCRC1
1647	-3.8277e-05	3.8277e-05	UROD
1648	3.81784e-05	3.81784e-05	IRAK1BP1
1649	-3.81569e-05	3.81569e-05	GABRB1
1650	3.81359e-05	3.81359e-05	ERMN
1651	3.8083e-05	3.8083e-05	SMARCA2
1652	3.80803e-05	3.80803e-05	SIRT7
1653	-3.80416e-05	3.80416e-05	SRSF9
1654	-3.80156e-05	3.80156e-05	S100A6
1655	3.80044e-05	3.80044e-05	TPD52L1
1656	-3.79612e-05	3.79612e-05	STAMBPL1
1657	-3.79389e-05	3.79389e-05	LRRC73
1658	3.79329e-05	3.79329e-05	CAPNS1
1659	-3.7841e-05	3.7841e-05	CAMK1D
1660	-3.78267e-05	3.78267e-05	TCEA2
1661	3.782e-05	3.782e-05	HNRNPH3
1662	3.77761e-05	3.77761e-05	STK10
1663	3.77566e-05	3.77566e-05	MMADHC
1664	3.77031e-05	3.77031e-05	CLK1
1665	-3.76942e-05	3.76942e-05	ZNF579
1666	-3.76712e-05	3.76712e-05	KCNIP3
1667	-3.76421e-05	3.76421e-05	UBE2H
1668	-3.76024e-05	3.76024e-05	WDR54
1669	3.76007e-05	3.76007e-05	ATP2A2
1670	3.75838e-05	3.75838e-05	RPL13
1671	3.7551e-05	3.7551e-05	THOC3
1672	-3.75228e-05	3.75228e-05	KCNN1
1673	3.73555e-05	3.73555e-05	EMC4
1674	3.73453e-05	3.73453e-05	CS
1675	3.73396e-05	3.73396e-05	SPC24
1676	3.72437e-05	3.72437e-05	BTBD1
1677	-3.71946e-05	3.71946e-05	NCAN
1678	3.71691e-05	3.71691e-05	IGFBP4
1679	3.71458e-05	3.71458e-05	NUP85
1680	-3.71058e-05	3.71058e-05	VEZF1
1681	3.70669e-05	3.70669e-05	TRIP12
1682	-3.70647e-05	3.70647e-05	NFAT5
1683	-3.69862e-05	3.69862e-05	HCFC1R1
1684	-3.69682e-05	3.69682e-05	TSC22D3
1685	-3.69647e-05	3.69647e-05	TTYH2
1686	-3.69239e-05	3.69239e-05	TIMM21
1687	3.68671e-05	3.68671e-05	TAF1C
1688	3.68566e-05	3.68566e-05	ITGB1BP1
1689	3.67978e-05	3.67978e-05	ACO2
1690	3.67628e-05	3.67628e-05	ZNF136
1691	3.67476e-05	3.67476e-05	LYRM1
1692	-3.67371e-05	3.67371e-05	TTC19
1693	3.67122e-05	3.67122e-05	ARHGAP12
1694	3.6702e-05	3.6702e-05	DENND4B
1695	3.66914e-05	3.66914e-05	SOBP
1696	-3.66423e-05	3.66423e-05	WDR18
1697	3.66169e-05	3.66169e-05	CHMP1A
1698	-3.65861e-05	3.65861e-05	VPS37B
1699	-3.64866e-05	3.64866e-05	SLC9A6
1700	3.64861e-05	3.64861e-05	GMNN
1701	-3.64554e-05	3.64554e-05	TM9SF3
1702	3.64055e-05	3.64055e-05	ATP2C1
1703	3.63843e-05	3.63843e-05	ANKRD27
1704	3.63477e-05	3.63477e-05	LPCAT1
1705	3.63154e-05	3.63154e-05	GABARAPL2
1706	3.63065e-05	3.63065e-05	NKAIN2
1707	3.63004e-05	3.63004e-05	GPC5
1708	-3.62602e-05	3.62602e-05	SLC35F3
1709	-3.62591e-05	3.62591e-05	FPGS
1710	3.62218e-05	3.62218e-05	UBA1
1711	-3.61965e-05	3.61965e-05	SC5D
1712	-3.6154e-05	3.6154e-05	CSNK2B
1713	-3.61324e-05	3.61324e-05	EPB41L2
1714	3.61301e-05	3.61301e-05	EIF1AX
1715	3.61033e-05	3.61033e-05	ZMIZ1
1716	-3.60988e-05	3.60988e-05	ATG3
1717	3.60667e-05	3.60667e-05	CCDC92
1718	3.60606e-05	3.60606e-05	TRIM8
1719	3.59932e-05	3.59932e-05	COX7A1
1720	3.59356e-05	3.59356e-05	LRSAM1
1721	-3.58937e-05	3.58937e-05	DLD
1722	-3.58817e-05	3.58817e-05	MESP1
1723	-3.58499e-05	3.58499e-05	SPG21
1724	3.58108e-05	3.58108e-05	C7orf43
1725	-3.57708e-05	3.57708e-05	FCHSD2
1726	3.57482e-05	3.57482e-05	REXO2
1727	-3.57285e-05	3.57285e-05	CBWD3
1728	3.56678e-05	3.56678e-05	TMEM19
1729	-3.56334e-05	3.56334e-05	FBXO33
1730	3.56144e-05	3.56144e-05	CNDP2
1731	-3.5586e-05	3.5586e-05	SMAD3
1732	-3.55841e-05	3.55841e-05	PARK7
1733	3.55423e-05	3.55423e-05	VASH1
1734	3.55278e-05	3.55278e-05	EXTL3
1735	-3.54721e-05	3.54721e-05	DNAJC7
1736	3.54534e-05	3.54534e-05	SNRPD2
1737	3.54496e-05	3.54496e-05	SEC63
1738	3.54441e-05	3.54441e-05	KLHL5
1739	-3.5443e-05	3.5443e-05	LPCAT4
1740	-3.54089e-05	3.54089e-05	EPRS
1741	3.53539e-05	3.53539e-05	ABHD6
1742	3.53374e-05	3.53374e-05	CWF19L2
1743	-3.53174e-05	3.53174e-05	NDUFA2
1744	3.52956e-05	3.52956e-05	FAM53B
1745	3.52493e-05	3.52493e-05	IRF9
1746	-3.52406e-05	3.52406e-05	IFT20
1747	3.52231e-05	3.52231e-05	RAP2C
1748	-3.52174e-05	3.52174e-05	TSPAN13
1749	3.52075e-05	3.52075e-05	CRTAM
1750	3.51712e-05	3.51712e-05	ACTR6
1751	-3.51523e-05	3.51523e-05	MED16
1752	3.51398e-05	3.51398e-05	BRD3
1753	-3.50892e-05	3.50892e-05	ZC3H11A
1754	-3.50858e-05	3.50858e-05	SPON2
1755	-3.50734e-05	3.50734e-05	DYNLRB1
1756	-3.50581e-05	3.50581e-05	AK1
1757	3.50533e-05	3.50533e-05	PPT1
1758	3.50403e-05	3.50403e-05	TDP2
1759	3.5002e-05	3.5002e-05	WBP4
1760	-3.49606e-05	3.49606e-05	UQCRFS1
1761	-3.49527e-05	3.49527e-05	CGRRF1
1762	3.49322e-05	3.49322e-05	ANKRD46
1763	-3.48614e-05	3.48614e-05	THAP4
1764	3.47393e-05	3.47393e-05	TRIM33
1765	3.47342e-05	3.47342e-05	SWSAP1
1766	3.47296e-05	3.47296e-05	HDLBP
1767	3.46789e-05	3.46789e-05	EPN1
1768	-3.46727e-05	3.46727e-05	CTSA
1769	3.46474e-05	3.46474e-05	PDE6H
1770	3.45978e-05	3.45978e-05	TWISTNB
1771	-3.45587e-05	3.45587e-05	MRPL17
1772	-3.45433e-05	3.45433e-05	GLTP
1773	3.45213e-05	3.45213e-05	NMNAT1
1774	-3.43956e-05	3.43956e-05	MTMR4
1775	3.43833e-05	3.43833e-05	GCLC
1776	-3.43806e-05	3.43806e-05	ADCY3
1777	3.4374e-05	3.4374e-05	NPC1
1778	3.43124e-05	3.43124e-05	LLGL2
1779	3.42616e-05	3.42616e-05	TALDO1
1780	-3.42585e-05	3.42585e-05	BLVRA
1781	-3.4229e-05	3.4229e-05	HES4
1782	-3.42082e-05	3.42082e-05	HSD17B10
1783	-3.41272e-05	3.41272e-05	BEX5
1784	-3.41142e-05	3.41142e-05	PPP6R2
1785	-3.40194e-05	3.40194e-05	PPP1R16B
1786	-3.40142e-05	3.40142e-05	MFN2
1787	-3.39538e-05	3.39538e-05	FDFT1
1788	3.39431e-05	3.39431e-05	SUMO1
1789	3.38231e-05	3.38231e-05	CNTNAP1
1790	3.38174e-05	3.38174e-05	UBXN2A
1791	-3.37873e-05	3.37873e-05	KPNB1
1792	-3.37279e-05	3.37279e-05	TATDN2
1793	3.36702e-05	3.36702e-05	LAP3
1794	3.36616e-05	3.36616e-05	ZMYM3
1795	-3.35688e-05	3.35688e-05	PLEKHH1
1796	-3.34616e-05	3.34616e-05	PSMA4
1797	3.34552e-05	3.34552e-05	CAPZA1
1798	3.34388e-05	3.34388e-05	LPAR1
1799	-3.33868e-05	3.33868e-05	SMAP2
1800	3.33852e-05	3.33852e-05	BIN1
1801	3.33842e-05	3.33842e-05	DENND3
1802	-3.33571e-05	3.33571e-05	ZBTB4
1803	3.33444e-05	3.33444e-05	DPF1
1804	-3.3332e-05	3.3332e-05	ARL6IP4
1805	3.33034e-05	3.33034e-05	KMT5B
1806	-3.32968e-05	3.32968e-05	OAZ2
1807	-3.32719e-05	3.32719e-05	TCEAL8
1808	3.32441e-05	3.32441e-05	CACYBP
1809	3.3225e-05	3.3225e-05	CERCAM
1810	-3.31744e-05	3.31744e-05	RIOK3
1811	3.31695e-05	3.31695e-05	B4GALNT4
1812	3.31539e-05	3.31539e-05	CNST
1813	-3.31354e-05	3.31354e-05	SH2D5
1814	3.31255e-05	3.31255e-05	PDYN
1815	3.31091e-05	3.31091e-05	PLXNB2
1816	3.30543e-05	3.30543e-05	ACAD11
1817	3.30385e-05	3.30385e-05	ARF1
1818	3.29201e-05	3.29201e-05	TRRAP
1819	3.29132e-05	3.29132e-05	SLC22A23
1820	-3.29024e-05	3.29024e-05	TSPAN7
1821	-3.28993e-05	3.28993e-05	ANKIB1
1822	-3.28948e-05	3.28948e-05	SEC62
1823	-3.28911e-05	3.28911e-05	GOLIM4
1824	3.28644e-05	3.28644e-05	FMR1
1825	3.28623e-05	3.28623e-05	CHRNA3
1826	-3.28606e-05	3.28606e-05	GABBR2
1827	3.28598e-05	3.28598e-05	PHACTR3
1828	3.28445e-05	3.28445e-05	ANXA7
1829	-3.28278e-05	3.28278e-05	MRPL18
1830	3.28089e-05	3.28089e-05	TGFBI
1831	-3.27144e-05	3.27144e-05	STRAP
1832	-3.26937e-05	3.26937e-05	COL5A3
1833	-3.26582e-05	3.26582e-05	TRIM9
1834	3.26222e-05	3.26222e-05	BCORL1
1835	-3.26181e-05	3.26181e-05	HMBOX1
1836	3.26037e-05	3.26037e-05	NGEF
1837	-3.25991e-05	3.25991e-05	FUNDC1
1838	-3.25037e-05	3.25037e-05	RSRC2
1839	-3.2482e-05	3.2482e-05	FAN1
1840	3.24747e-05	3.24747e-05	POLR2F
1841	-3.2423e-05	3.2423e-05	DGKD
1842	3.24113e-05	3.24113e-05	SRSF6
1843	-3.23703e-05	3.23703e-05	D2HGDH
1844	-3.23541e-05	3.23541e-05	CGN
1845	-3.23058e-05	3.23058e-05	KPNA4
1846	3.2305e-05	3.2305e-05	PRPF31
1847	3.22692e-05	3.22692e-05	CARMIL2
1848	3.22588e-05	3.22588e-05	UCK1
1849	-3.22047e-05	3.22047e-05	MYO6
1850	3.21727e-05	3.21727e-05	IFT88
1851	3.21415e-05	3.21415e-05	CRBN
1852	3.21411e-05	3.21411e-05	MPP3
1853	3.21166e-05	3.21166e-05	SNAP47
1854	-3.20745e-05	3.20745e-05	SRP54
1855	-3.20635e-05	3.20635e-05	WWP1
1856	3.20587e-05	3.20587e-05	FOXRED2
1857	-3.20553e-05	3.20553e-05	SCN1A
1858	-3.20152e-05	3.20152e-05	TTC14
1859	-3.20152e-05	3.20152e-05	GPATCH3
1860	-3.20096e-05	3.20096e-05	TOP1
1861	-3.20009e-05	3.20009e-05	RNF20
1862	-3.1998e-05	3.1998e-05	DAPL1
1863	3.18913e-05	3.18913e-05	LAMA5
1864	3.18708e-05	3.18708e-05	NCDN
1865	3.1865e-05	3.1865e-05	IGSF21
1866	-3.18445e-05	3.18445e-05	SLC9A1
1867	3.18039e-05	3.18039e-05	TSPAN17
1868	3.18024e-05	3.18024e-05	PRCP
1869	3.17532e-05	3.17532e-05	PACSIN2
1870	-3.17135e-05	3.17135e-05	DEK
1871	3.16739e-05	3.16739e-05	PCNT
1872	3.16505e-05	3.16505e-05	RAPGEF5
1873	-3.16482e-05	3.16482e-05	PTPRD
1874	3.15546e-05	3.15546e-05	APP
1875	-3.15369e-05	3.15369e-05	ARHGAP44
1876	-3.15017e-05	3.15017e-05	SLC8A2
1877	-3.14211e-05	3.14211e-05	BAP1
1878	3.14183e-05	3.14183e-05	ZMAT3
1879	3.13953e-05	3.13953e-05	PTPN12
1880	-3.13309e-05	3.13309e-05	GAD1
1881	3.13148e-05	3.13148e-05	EPHB6
1882	3.12699e-05	3.12699e-05	SUGP1
1883	3.12691e-05	3.12691e-05	MATR3
1884	3.12088e-05	3.12088e-05	HEATR6
1885	-3.11462e-05	3.11462e-05	NUB1
1886	3.10854e-05	3.10854e-05	IQSEC3
1887	3.10632e-05	3.10632e-05	CSRNP1
1888	3.10566e-05	3.10566e-05	ARHGAP33
1889	-3.09341e-05	3.09341e-05	FOS
1890	-3.09329e-05	3.09329e-05	DMC1
1891	-3.09056e-05	3.09056e-05	MORF4L2
1892	-3.0874e-05	3.0874e-05	GNPAT
1893	-3.08183e-05	3.08183e-05	MRPL41
1894	3.07774e-05	3.07774e-05	EIF3L
1895	-3.0767e-05	3.0767e-05	DNAJB2
1896	-3.07188e-05	3.07188e-05	TMEM161A
1897	-3.06624e-05	3.06624e-05	FAM81A
1898	-3.06284e-05	3.06284e-05	ARL1
1899	3.06248e-05	3.06248e-05	RAB18
1900	3.06239e-05	3.06239e-05	YEATS2
1901	-3.06082e-05	3.06082e-05	DYNC1I1
1902	-3.05793e-05	3.05793e-05	CPQ
1903	-3.05653e-05	3.05653e-05	PCP2
1904	3.05444e-05	3.05444e-05	CCT3
1905	3.05298e-05	3.05298e-05	POLE4
1906	3.05161e-05	3.05161e-05	INSM1
1907	3.05026e-05	3.05026e-05	KLHL42
1908	-3.04462e-05	3.04462e-05	HBG1
1909	3.04439e-05	3.04439e-05	CMTR1
1910	3.04229e-05	3.04229e-05	ENPP4
1911	-3.03917e-05	3.03917e-05	LY6E
1912	3.03468e-05	3.03468e-05	ATXN10
1913	3.03135e-05	3.03135e-05	SLC27A3
1914	-3.03009e-05	3.03009e-05	BLCAP
1915	3.02991e-05	3.02991e-05	RNF115
1916	3.02974e-05	3.02974e-05	SECISBP2L
1917	-3.02955e-05	3.02955e-05	FAM133A
1918	-3.02808e-05	3.02808e-05	NAGPA
1919	3.02672e-05	3.02672e-05	TMEM156
1920	-3.0238e-05	3.0238e-05	HDAC8
1921	3.02351e-05	3.02351e-05	GFPT2
1922	3.02209e-05	3.02209e-05	XPO1
1923	-3.01863e-05	3.01863e-05	HSD11B1L
1924	3.01329e-05	3.01329e-05	ABCA3
1925	3.01116e-05	3.01116e-05	YAP1
1926	-3.00891e-05	3.00891e-05	C1orf35
1927	-3.00803e-05	3.00803e-05	NEU1
1928	-3.0037e-05	3.0037e-05	VPS26A
1929	2.99948e-05	2.99948e-05	UBR4
1930	2.99726e-05	2.99726e-05	STK24
1931	2.99451e-05	2.99451e-05	LIX1
1932	-2.9929e-05	2.9929e-05	LTN1
1933	2.98752e-05	2.98752e-05	PSIP1
1934	-2.98412e-05	2.98412e-05	PSMC3
1935	2.98376e-05	2.98376e-05	TBK1
1936	-2.98141e-05	2.98141e-05	NAT10
1937	-2.98063e-05	2.98063e-05	TEX2
1938	-2.97257e-05	2.97257e-05	ALG5
1939	2.97245e-05	2.97245e-05	SH3BGRL2
1940	-2.96637e-05	2.96637e-05	ZNHIT6
1941	-2.96561e-05	2.96561e-05	BDH2
1942	-2.96069e-05	2.96069e-05	NDUFS4
1943	2.95786e-05	2.95786e-05	MSH3
1944	-2.956e-05	2.956e-05	ZNF44
1945	-2.95559e-05	2.95559e-05	C6orf62
1946	2.95407e-05	2.95407e-05	GRAMD1C
1947	-2.9522e-05	2.9522e-05	CDAN1
1948	-2.95186e-05	2.95186e-05	CCS
1949	2.94652e-05	2.94652e-05	ATP6V1H
1950	2.94647e-05	2.94647e-05	MOXD1
1951	2.93847e-05	2.93847e-05	GLT1D1
1952	2.93804e-05	2.93804e-05	RANBP1
1953	-2.93557e-05	2.93557e-05	FSD1
1954	-2.93467e-05	2.93467e-05	NT5M
1955	-2.93392e-05	2.93392e-05	FANCC
1956	-2.92912e-05	2.92912e-05	RNF114
1957	2.92792e-05	2.92792e-05	TUBB4A
1958	2.92779e-05	2.92779e-05	CEBPZ
1959	2.92557e-05	2.92557e-05	GNG11
1960	-2.92396e-05	2.92396e-05	NDUFB10
1961	-2.9237e-05	2.9237e-05	C1orf64
1962	2.92301e-05	2.92301e-05	NIF3L1
1963	-2.92092e-05	2.92092e-05	TCP1
1964	2.92066e-05	2.92066e-05	GANAB
1965	-2.92e-05	2.92e-05	TOMM7
1966	2.91959e-05	2.91959e-05	BEND5
1967	2.91705e-05	2.91705e-05	RPS6KC1
1968	2.9169e-05	2.9169e-05	SLC4A3
1969	-2.91554e-05	2.91554e-05	NOV
1970	-2.91366e-05	2.91366e-05	PDE9A
1971	2.91279e-05	2.91279e-05	HLA-DMB
1972	2.91069e-05	2.91069e-05	CADPS
1973	2.90781e-05	2.90781e-05	RAB22A
1974	-2.90154e-05	2.90154e-05	KPNA3
1975	-2.89481e-05	2.89481e-05	GDI2
1976	-2.89428e-05	2.89428e-05	PLIN3
1977	2.89361e-05	2.89361e-05	RPS29
1978	-2.89358e-05	2.89358e-05	MYL12B
1979	-2.89277e-05	2.89277e-05	FAM98C
1980	2.89203e-05	2.89203e-05	GSTK1
1981	-2.89152e-05	2.89152e-05	RITA1
1982	-2.89128e-05	2.89128e-05	PDIA2
1983	-2.88061e-05	2.88061e-05	CHAD
1984	2.88009e-05	2.88009e-05	FBXO27
1985	-2.87815e-05	2.87815e-05	DDX1
1986	-2.87099e-05	2.87099e-05	VASN
1987	-2.86909e-05	2.86909e-05	PEPD
1988	-2.86693e-05	2.86693e-05	NAA38
1989	-2.86471e-05	2.86471e-05	FIG4
1990	2.86399e-05	2.86399e-05	TPCN2
1991	2.8601e-05	2.8601e-05	FNBP4
1992	2.85859e-05	2.85859e-05	SORBS1
1993	-2.8573e-05	2.8573e-05	GGNBP2
1994	2.84723e-05	2.84723e-05	SCP2
1995	2.84572e-05	2.84572e-05	ITGA2B
1996	-2.83713e-05	2.83713e-05	YJEFN3
1997	2.83699e-05	2.83699e-05	LZTFL1
1998	-2.83629e-05	2.83629e-05	SNAP91
1999	-2.83448e-05	2.83448e-05	ZNF337
[truncated: 14,743 more rows]
