# Supplementary material for: Sensitivity of substrate translocation in chaperone-mediated autophagy to Alzheimer’s disease progression
Source: Aging (Albany NY). 2024 May 23;16(10):9072–105. doi: 10.18632/aging.205856 (PMC11164475; doi:10.18632/aging.205856)
Supplement: Supplementary File 3 [file aging-16-205856-s005.xlsx]

## Sheet: GO analysis
Supplementary File 3. GOKEGG analysis results.
ONTOLOGY	ID	Description	GeneRatio	BgRatio	pvalue	p.adjust	qvalue	geneID	Count
BP	GO:0090150	establishment of protein localization to membrane	99/1445	354/18862	5.5328e-31	3.13433e-27	2.6505e-27	RPL31/RPL38/RPL19/BLZF1/RPL4/RPL24/RPL11/RPS14/RPS26/RPL5/YWHAH/RPL35/RPL41/CALM1/RPS24/PRNP/SRP14/RPS25/NACA/RPL18A/RPS4Y1/RPL37A/RPL18/CNST/GDI1/RPS4X/UBA52/RPS27/RPSA/CLSTN1/RPL23A/RPS6/RPLP1/RPS10/RPS3/RPS23/SNAP25/PPP3R1/RPS21/ATP1B1/RAB10/RACK1/RPS3A/KCNB1/CEMIP/C2CD5/CHMP4B/RPS20/REEP2/OPTN/RPLP2/RPL27/RPS8/RPL26/STOM/YWHAG/ZDHHC23/FYN/RPS7/RPL3/CPLX1/GRIPAP1/RPL21/SRP72/RPL36/RPL10A/BAG6/…	99
BP	GO:0006614	SRP-dependent cotranslational protein targeting to membrane	52/1445	105/18862	2.33782e-30	6.62187e-27	5.59969e-27	RPL31/RPL38/RPL19/RPL4/RPL24/RPL11/RPS14/RPS26/RPL5/RPL35/RPL41/RPS24/SRP14/RPS25/RPL18A/RPS4Y1/RPL37A/RPL18/RPS4X/UBA52/RPS27/RPSA/RPL23A/RPS6/RPLP1/RPS10/RPS3/RPS23/RPS21/RPS3A/RPS20/RPLP2/RPL27/RPS8/RPL26/RPS7/RPL3/RPL21/SRP72/RPL36/RPL10A/RPL13A/RPL9/RPL30/RPS28/RPL27A/RPS18/RPS9/RPL17/RPS19/RPL23/SRP9	52
BP	GO:0006613	cotranslational protein targeting to membrane	53/1445	110/18862	3.74579e-30	7.0733e-27	5.98144e-27	RPL31/RPL38/RPL19/RPL4/RPL24/RPL11/RPS14/RPS26/RPL5/RPL35/RPL41/RPS24/SRP14/RPS25/RPL18A/RPS4Y1/RPL37A/RPL18/RPS4X/UBA52/RPS27/RPSA/RPL23A/RPS6/RPLP1/RPS10/RPS3/RPS23/RPS21/RPS3A/RPS20/RPLP2/RPL27/RPS8/RPL26/RPS7/RPL3/RPL21/SRP72/RPL36/RPL10A/RPL13A/RPL9/RPL30/RPS28/ARL6IP1/RPL27A/RPS18/RPS9/RPL17/RPS19/RPL23/SRP9	53
BP	GO:0072599	establishment of protein localization to endoplasmic reticulum	55/1445	124/18862	6.28384e-29	8.89948e-26	7.52572e-26	RPL31/RPL38/RPL19/RPL4/RPL24/RPL11/RPS14/RPS26/RPL5/RPL35/RPL41/RPS24/SRP14/RPS25/RPL18A/RPS4Y1/RPL37A/RPL18/RPS4X/UBA52/RPS27/RPSA/RPL23A/RPS6/RPLP1/RPS10/RPS3/RPS23/RPS21/RAB10/RPS3A/CHMP4B/SPCS1/RPS20/RPLP2/RPL27/RPS8/RPL26/RPS7/RPL3/RPL21/SRP72/RPL36/RPL10A/RPL13A/RPL9/RPL30/RPS28/RPL27A/RPS18/RPS9/RPL17/RPS19/RPL23/SRP9	55
BP	GO:0045047	protein targeting to ER	54/1445	120/18862	8.17031e-29	9.25696e-26	7.82801e-26	RPL31/RPL38/RPL19/RPL4/RPL24/RPL11/RPS14/RPS26/RPL5/RPL35/RPL41/RPS24/SRP14/RPS25/RPL18A/RPS4Y1/RPL37A/RPL18/RPS4X/UBA52/RPS27/RPSA/RPL23A/RPS6/RPLP1/RPS10/RPS3/RPS23/RPS21/RPS3A/CHMP4B/SPCS1/RPS20/RPLP2/RPL27/RPS8/RPL26/RPS7/RPL3/RPL21/SRP72/RPL36/RPL10A/RPL13A/RPL9/RPL30/RPS28/RPL27A/RPS18/RPS9/RPL17/RPS19/RPL23/SRP9	54
BP	GO:0000184	nuclear-transcribed mRNA catabolic process, nonsense-mediated decay	53/1445	120/18862	8.23832e-28	7.77835e-25	6.57765e-25	RPL31/RPL38/RPL19/RPL4/RPL24/RPL11/RPS14/RPS26/RPL5/RPL35/RPL41/RPS24/PPP2R1A/RPS25/RPL18A/RPS4Y1/RPL37A/RPL18/SMG1/RPS4X/UBA52/RPS27/RPSA/RPL23A/RPS6/RPLP1/RPS10/RPS3/RPS23/RPS21/RPS3A/RPS20/RPLP2/RPL27/RPS8/RPL26/RPS7/RPL3/PPP2CA/RPL21/RPL36/RPL10A/RPL13A/RPL9/RPL30/RPS28/RPL27A/RPS18/RPS9/RPL17/RPS19/RPL23/PNRC2	53
BP	GO:0006612	protein targeting to membrane	69/1445	211/18862	2.54935e-26	2.06315e-23	1.74467e-23	RPL31/RPL38/RPL19/RPL4/RPL24/RPL11/RPS14/RPS26/RPL5/RPL35/RPL41/RPS24/PRNP/SRP14/RPS25/NACA/RPL18A/RPS4Y1/RPL37A/RPL18/GDI1/RPS4X/UBA52/RPS27/RPSA/RPL23A/RPS6/RPLP1/RPS10/RPS3/RPS23/RPS21/RPS3A/KCNB1/CEMIP/C2CD5/CHMP4B/RPS20/RPLP2/RPL27/RPS8/RPL26/STOM/ZDHHC23/FYN/RPS7/RPL3/RPL21/SRP72/RPL36/RPL10A/RPL13A/RPL9/RPL30/FIS1/RPS28/ARL6IP1/ANK3/RPL27A/RPS18/ADORA1/RPS9/RPL17/RPS19/RPL23/HRAS/ZDHHC22/H…	69
BP	GO:0070972	protein localization to endoplasmic reticulum	57/1445	152/18862	2.18599e-25	1.54795e-22	1.309e-22	RPL31/RPL38/RPL19/RPL4/RPL24/RPL11/RPS14/RPS26/RPL5/RPL35/RPL41/RPS24/SRP14/RPS25/GJA1/RPL18A/RPS4Y1/RPL37A/RPL18/RPS4X/UBA52/RPS27/RPSA/RPL23A/RPS6/RPLP1/RPS10/RPS3/RPS23/RPS21/RAB10/RPS3A/CHMP4B/SPCS1/RPS20/RPLP2/RPL27/RPS8/RPL26/RTN4/RPS7/RPL3/RPL21/SRP72/RPL36/RPL10A/RPL13A/RPL9/RPL30/RPS28/RPL27A/RPS18/RPS9/RPL17/RPS19/RPL23/SRP9	57
BP	GO:0006413	translational initiation	64/1445	193/18862	7.008e-25	4.41115e-22	3.73022e-22	RPL31/RPL38/RPL19/RPL4/RPL24/RPL11/RPS14/RPS26/RPL5/RPL35/RPL41/RPS24/RPS25/RPL18A/RPS4Y1/RPL37A/RPL18/RPS4X/UBA52/RPS27/RPSA/RPL23A/RPS6/EIF1/RPLP1/RPS10/RPS3/RPS23/EIF3C/RPS21/RPS3A/RPS20/RPLP2/RPL27/LARP1/RPS8/RPL26/RPS7/RPL3/RPL21/RPL36/RPL10A/HSPB1/MTIF3/EIF2B4/RPL13A/RPL9/RPL30/EIF2S3/EIF1B/NPM1/PAIP2B/RPS28/DDX1/RPL27A/RPS18/RPS9/RPL17/KHDRBS1/HABP4/EIF1AX/RPS19/RPL23/EIF4G3	64
BP	GO:0019083	viral transcription	60/1445	180/18862	1.54448e-23	8.74946e-21	7.39885e-21	RPL31/RPL38/RPL19/RPL4/RPL24/RPL11/RPS14/IFITM3/NUCKS1/RPS26/RPL5/RPL35/RPL41/RPS24/RPS25/RPL18A/RPS4Y1/RPL37A/RPL18/RPS4X/UBA52/RPS27/RPSA/RPL23A/RPS6/RPLP1/RPS10/RPS3/RPS23/RPS21/RPS3A/RPS20/RPLP2/RPL27/RPS8/POLR2I/RPL26/POLR2F/RPS7/RPL3/RPL21/RPL36/RPL10A/RPL13A/RPL9/PSMC3/RPL30/RPS28/NELFCD/SMARCA4/RPL27A/POLR2L/GTF2F1/RPS18/POLR2J/RPS9/RPL17/POLR2A/RPS19/RPL23	60
BP	GO:0019080	viral gene expression	62/1445	198/18862	1.20234e-22	6.19205e-20	5.23622e-20	RPL31/RPL38/RPL19/RPL4/RPL24/RPL11/RPS14/IFITM3/NUCKS1/RPS26/RPL5/RPL35/RPL41/RPS24/RPS25/RPL18A/RPS4Y1/RPL37A/RPL18/RPS4X/UBA52/RPS27/RPSA/RPL23A/RPS6/RPLP1/RPS10/RPS3/RPS23/RPS21/RPS3A/SPCS1/RPS20/RPLP2/RPL27/RPS8/POLR2I/RPL26/POLR2F/RPS7/RPL3/RPL21/RPL36/RPL10A/RPL13A/RPL9/PSMC3/RPL30/RPS28/NELFCD/SMARCA4/RPL27A/POLR2L/GTF2F1/RPS18/POLR2J/RPS9/RPL17/POLR2A/RPS19/RPL23/FURIN	62
BP	GO:0006402	mRNA catabolic process	89/1445	375/18862	1.81168e-22	8.55263e-20	7.23241e-20	RPL31/RPL38/RPL19/RPL4/HSPA1B/RPL24/CNOT2/RPL11/RPS14/RPS26/RPL5/PSMA7/PSMC5/RPL35/RPL41/ALKBH5/RPS24/PPP2R1A/RPS25/RPL18A/RPS4Y1/VIM/UBC/RPL37A/RPL18/SMG1/SERBP1/RPS4X/UBA52/RPS27/RPSA/RPL23A/RPS6/RPLP1/SET/RPS10/RPS3/RPS23/RPS21/RPS3A/RPS20/RPLP2/UBB/RPL27/YBX1/LARP1/RPS8/RPL26/EXOSC2/PUM1/PSMD11/RPS7/RPL3/PPP2CA/RPL21/PSMB3/RPL36/RPL10A/HSPB1/TAF15/PAN2/RPL13A/RPL9/PSMC3/RPL30/NPM1/ROCK2/RPS28…	89
BP	GO:0006401	RNA catabolic process	92/1445	414/18862	4.57225e-21	1.99245e-18	1.68488e-18	RPL31/RPL38/RPL19/RPL4/HSPA1B/RPL24/CNOT2/RPL11/RPS14/RPS26/RPL5/PSMA7/PSMC5/RPL35/RPL41/ALKBH5/RPS24/PPP2R1A/RPS25/RPL18A/RPS4Y1/VIM/UBC/RPL37A/SLFN13/RPL18/SMG1/SERBP1/RPS4X/UBA52/RPS27/RPSA/RPL23A/RPS6/RPLP1/SET/RPS10/RPS3/RPS23/RPS21/RPS3A/RPS20/RNASET2/RPLP2/UBB/RPL27/YBX1/LARP1/RPS8/RPL26/EXOSC2/PUM1/PSMD11/RPS7/RPL3/PPP2CA/RPL21/PSMB3/RPL36/RPL10A/SLIRP/HSPB1/TAF15/PAN2/RPL13A/RPL9/PSMC3/R…	92
BP	GO:0006605	protein targeting	94/1445	441/18862	3.58889e-20	1.45222e-17	1.22805e-17	RPL31/RPL38/CLU/RPL19/RPL4/RPL24/RPL11/RPS14/RPS26/RPL5/RPL35/RPL41/RPS24/STXBP4/PRNP/SRP14/RPS25/NACA/RPL18A/RPS4Y1/UBC/RPL37A/RPL18/GDI1/RPS4X/UBA52/RPS27/RPSA/RPL23A/RPS6/RPLP1/RPS10/RPS3/RPS23/RPS21/RPS3A/KCNB1/CEMIP/C2CD5/CHMP4B/SPCS1/RPS20/CACNG3/RPLP2/UBB/RPL27/RPS8/RPL26/STOM/TOMM34/YWHAG/ZDHHC23/FYN/RPS7/RPL3/RPL21/SRP72/RPL36/RPL10A/TOMM40L/BAG3/NAGPA/RPL13A/RPL9/UBL5/RPL30/FIS1/BAP1/GS…	94
BP	GO:0000956	nuclear-transcribed mRNA catabolic process	59/1445	208/18862	2.9563e-19	1.11649e-16	9.44148e-17	RPL31/RPL38/RPL19/RPL4/RPL24/CNOT2/RPL11/RPS14/RPS26/RPL5/RPL35/RPL41/RPS24/PPP2R1A/RPS25/RPL18A/RPS4Y1/RPL37A/RPL18/SMG1/RPS4X/UBA52/RPS27/RPSA/RPL23A/RPS6/RPLP1/RPS10/RPS3/RPS23/RPS21/RPS3A/RPS20/RPLP2/RPL27/RPS8/RPL26/EXOSC2/RPS7/RPL3/PPP2CA/RPL21/RPL36/RPL10A/PAN2/RPL13A/RPL9/RPL30/RPS28/RPL27A/RPS18/RPS9/RPL17/RPS19/RPL23/WDR61/PNRC2/DDX5/TNRC6B	59
BP	GO:0099177	regulation of trans-synaptic signaling	68/1445	406/18862	6.74839e-10	2.38935e-07	2.02052e-07	FAM107A/CAMK2A/RAB3A/PTN/TUBB2B/APOE/PRRT2/YWHAH/PSMC5/CALM1/RGS4/RELN/NCS1/PRKCB/NPTX2/NRGN/CLSTN1/GNAI2/KCNJ10/SNAP25/ATP1A2/KCNB1/SNCG/NPTN/FABP5/CACNG3/SLC7A11/YWHAG/SIPA1L1/CNIH2/FYN/CPLX1/GRIN1/DLGAP2/SYP/MEF2C/CDH2/CHRNA5/IL1B/PRKCG/BACE1/CALM3/GRM4/CALB1/VAMP2/STX1A/KIT/SNCAIP/SYT1/ABHD6/SQSTM1/CALB2/HTR2A/MPP2/ADORA1/PLCL2/NLGN4X/RAB26/RAB11A/HRAS/PRKAR2B/HOMER1/PLCB1/STX3/PTK2B/NLGN1/SY…	68
BP	GO:0050804	modulation of chemical synaptic transmission	67/1445	405/18862	1.52862e-09	5.09391e-07	4.3076e-07	FAM107A/CAMK2A/RAB3A/PTN/TUBB2B/APOE/PRRT2/YWHAH/PSMC5/CALM1/RGS4/RELN/NCS1/PRKCB/NPTX2/NRGN/CLSTN1/GNAI2/KCNJ10/SNAP25/ATP1A2/KCNB1/SNCG/NPTN/CACNG3/SLC7A11/YWHAG/SIPA1L1/CNIH2/FYN/CPLX1/GRIN1/DLGAP2/SYP/MEF2C/CDH2/CHRNA5/IL1B/PRKCG/BACE1/CALM3/GRM4/CALB1/VAMP2/STX1A/KIT/SNCAIP/SYT1/ABHD6/SQSTM1/CALB2/HTR2A/MPP2/ADORA1/PLCL2/NLGN4X/RAB26/RAB11A/HRAS/PRKAR2B/HOMER1/PLCB1/STX3/PTK2B/NLGN1/SYT4/GRM8	67
BP	GO:0006836	neurotransmitter transport	43/1445	209/18862	1.9373e-09	6.0971e-07	5.15593e-07	SLC1A3/CAMK2A/RAB3A/SV2B/PRRT2/CALM1/TSPOAP1/NAPB/NCS1/PRKCB/KCNJ10/SNAP25/ATP1A2/SNCG/RPH3A/SLC38A1/GAD2/CPLX1/SYP/MEF2C/CHRNA5/PRKCG/BACE1/CALM3/GRM4/VAMP2/STX1A/SV2A/SNCAIP/SYT1/HTR2A/SLC6A8/SLC6A12/PTPRN2/GLUL/PIP5K1C/STX3/NLGN1/CADPS2/SYT4/SLC32A1/DOC2A/GAD1	43
BP	GO:0001505	regulation of neurotransmitter levels	43/1445	211/18862	2.63069e-09	7.84361e-07	6.63284e-07	SLC1A3/CAMK2A/RAB3A/PRRT2/CALM1/TSPOAP1/NAPB/NCS1/PRKCB/KCNJ10/SNAP25/ATP1A2/SNCG/RPH3A/SLC38A1/GAD2/MAOA/CPLX1/SYP/MEF2C/CHRNA5/PRKCG/BACE1/CALM3/GRM4/VAMP2/STX1A/SV2A/SNCAIP/SYT1/ALDH5A1/HTR2A/SLC44A4/PTPRN2/GLUL/PIP5K1C/STX3/NLGN1/CADPS2/SYT4/SLC32A1/DOC2A/GAD1	43
BP	GO:0007269	neurotransmitter secretion	35/1445	155/18862	4.88867e-09	1.31878e-06	1.11521e-06	CAMK2A/RAB3A/PRRT2/CALM1/TSPOAP1/NAPB/NCS1/PRKCB/SNAP25/SNCG/RPH3A/GAD2/CPLX1/SYP/MEF2C/CHRNA5/PRKCG/BACE1/CALM3/GRM4/VAMP2/STX1A/SV2A/SNCAIP/SYT1/HTR2A/PTPRN2/PIP5K1C/STX3/NLGN1/CADPS2/SYT4/SLC32A1/DOC2A/GAD1	35
BP	GO:0099643	signal release from synapse	35/1445	155/18862	4.88867e-09	1.31878e-06	1.11521e-06	CAMK2A/RAB3A/PRRT2/CALM1/TSPOAP1/NAPB/NCS1/PRKCB/SNAP25/SNCG/RPH3A/GAD2/CPLX1/SYP/MEF2C/CHRNA5/PRKCG/BACE1/CALM3/GRM4/VAMP2/STX1A/SV2A/SNCAIP/SYT1/HTR2A/PTPRN2/PIP5K1C/STX3/NLGN1/CADPS2/SYT4/SLC32A1/DOC2A/GAD1	35
BP	GO:0099003	vesicle-mediated transport in synapse	39/1445	194/18862	2.12193e-08	5.46397e-06	4.62053e-06	RAB3A/PRRT2/CALM1/CALY/NAPB/NCS1/PRKCB/CLSTN1/SNAP25/RAPGEF4/SH3GL2/SNCG/KIAA1109/AP2B1/CPLX1/GRIPAP1/SYP/CANX/CDH2/CHRNA5/PRKCG/BACE1/CALM3/VAMP2/STX1A/SV2A/SYT1/HTR2A/NLGN4X/BSN/BRSK2/RAB11A/PIP5K1C/STX3/HPCA/NLGN1/CADPS2/SLC32A1/DOC2A	39
BP	GO:0042542	response to hydrogen peroxide	31/1445	135/18862	2.4032e-08	5.91919e-06	5.00548e-06	HBB/SIRPA/PLEKHA1/GPR37/ZNF580/CYP1B1/SOD1/RPS3/AQP1/HP/RACK1/BNIP3/HBA1/HBA2/EEF2/FYN/GNAO1/KLF4/FOXO1/FKBP1B/NET1/MAP3K5/KLF2/KCNA5/DUSP1/ANKZF1/LDHA/PDGFRB/NQO1/PTK2B/ANXA1	31
BP	GO:0043312	neutrophil degranulation	72/1445	485/18862	4.1214e-08	9.72821e-06	8.22652e-06	ALDOC/RAB3A/ATP6V0C/HSPA1B/EEF1A1/FTH1/HBB/METTL7A/SLPI/HSP90AB1/SRP14/ATP6V0A1/DYNC1H1/CST3/PFKL/MIF/YPEL5/NDUFC2/SIRPA/ATP6V1D/DYNLL1/SNAP25/SERPINA3/HP/XRCC5/RAB10/TTR/FABP5/PA2G4/TUBB4B/HSPA6/RNASET2/STOM/CTSB/TMBIM1/CAPN1/EEF2/PSMD11/TMEM63A/B2M/RAB5B/CTSA/SPTAN1/CYSTM1/PSMC3/NPC2/GCA/RAC1/MGST1/S100A8/CAP1/RHOG/TIMP2/CTSZ/CD55/COMMD9/LTF/IMPDH2/APEH/ARMC8/CD59/DDOST/MLEC/CREG1/PTPRN2/COTL1/…	72
BP	GO:0032386	regulation of intracellular transport	57/1445	350/18862	4.47205e-08	1.01337e-05	8.56938e-06	REEP5/ZIC1/NEFH/MAPK3/YWHAH/PRNP/HSP90AB1/DYNC1H1/CALY/APOD/GDI1/MAP2/PPP3R1/KCNB1/CEMIP/C2CD5/FEZ1/REEP2/NDRG4/STOM/CABP1/PCNT/YWHAG/CNIH2/ARHGAP1/FYN/GRIPAP1/YWHAE/PTPN11/SMAD3/BAG3/IL1B/UBL5/VAMP2/FIS1/BAP1/DMAP1/PPP1CC/FLNA/PPP1R13B/ANK3/RAN/MLC1/EMD/KHDRBS1/BRSK2/UBE2J1/IFI27/HRAS/SAR1A/HPCA/SORL1/MAP2K1/ABCA2/OAZ1/ERLEC1/SP100	57
BP	GO:0002283	neutrophil activation involved in immune response	72/1445	488/18862	5.30782e-08	1.15649e-05	9.77972e-06	ALDOC/RAB3A/ATP6V0C/HSPA1B/EEF1A1/FTH1/HBB/METTL7A/SLPI/HSP90AB1/SRP14/ATP6V0A1/DYNC1H1/CST3/PFKL/MIF/YPEL5/NDUFC2/SIRPA/ATP6V1D/DYNLL1/SNAP25/SERPINA3/HP/XRCC5/RAB10/TTR/FABP5/PA2G4/TUBB4B/HSPA6/RNASET2/STOM/CTSB/TMBIM1/CAPN1/EEF2/PSMD11/TMEM63A/B2M/RAB5B/CTSA/SPTAN1/CYSTM1/PSMC3/NPC2/GCA/RAC1/MGST1/S100A8/CAP1/RHOG/TIMP2/CTSZ/CD55/COMMD9/LTF/IMPDH2/APEH/ARMC8/CD59/DDOST/MLEC/CREG1/PTPRN2/COTL1/…	72
BP	GO:0042119	neutrophil activation	73/1445	500/18862	6.61084e-08	1.38705e-05	1.17294e-05	ALDOC/RAB3A/ATP6V0C/HSPA1B/EEF1A1/FTH1/HBB/METTL7A/SLPI/HSP90AB1/SRP14/ATP6V0A1/DYNC1H1/CST3/PFKL/MIF/YPEL5/NDUFC2/SIRPA/ATP6V1D/DYNLL1/SNAP25/SERPINA3/HP/XRCC5/RAB10/TTR/FABP5/PA2G4/TUBB4B/HSPA6/RNASET2/STOM/IL18/CTSB/TMBIM1/CAPN1/EEF2/PSMD11/TMEM63A/B2M/RAB5B/CTSA/SPTAN1/CYSTM1/PSMC3/NPC2/GCA/RAC1/MGST1/S100A8/CAP1/RHOG/TIMP2/CTSZ/CD55/COMMD9/LTF/IMPDH2/APEH/ARMC8/CD59/DDOST/MLEC/CREG1/PTPRN2/C…	73
BP	GO:0002446	neutrophil mediated immunity	72/1445	499/18862	1.30638e-07	2.64308e-05	2.23508e-05	ALDOC/RAB3A/ATP6V0C/HSPA1B/EEF1A1/FTH1/HBB/METTL7A/SLPI/HSP90AB1/SRP14/ATP6V0A1/DYNC1H1/CST3/PFKL/MIF/YPEL5/NDUFC2/SIRPA/ATP6V1D/DYNLL1/SNAP25/SERPINA3/HP/XRCC5/RAB10/TTR/FABP5/PA2G4/TUBB4B/HSPA6/RNASET2/STOM/CTSB/TMBIM1/CAPN1/EEF2/PSMD11/TMEM63A/B2M/RAB5B/CTSA/SPTAN1/CYSTM1/PSMC3/NPC2/GCA/RAC1/MGST1/S100A8/CAP1/RHOG/TIMP2/CTSZ/CD55/COMMD9/LTF/IMPDH2/APEH/ARMC8/CD59/DDOST/MLEC/CREG1/PTPRN2/COTL1/…	72
BP	GO:0002181	cytoplasmic translation	25/1445	102/18862	1.39845e-07	2.7318e-05	2.31011e-05	RPL31/RPL38/RPL19/RPL24/RPL11/RPS26/RPL41/RPL18A/RPL18/RPSA/RPLP1/RPS23/EIF3C/RPS21/RPLP2/RPL26/EEF2/RPL36/RPL10A/RPL13A/RPL9/RPL30/EIF2S3/RPS28/RPL17	25
BP	GO:0022904	respiratory electron transport chain	27/1445	117/18862	1.70095e-07	3.21196e-05	2.71615e-05	NDUFA4/UQCR10/NDUFC2/NDUFA5/CHCHD2/NDUFB4/NDUFV1/COX5A/COX4I1/COX7C/NDUFA10/NDUFB5/SLC25A18/COX8A/NDUFS8/NDUFS7/NDUFB8/ISCU/SDHD/SDHC/SDHA/ETFDH/PPARGC1A/NDUFB10/DLD/NDUFS5/NDUFB7	27
BP	GO:1903829	positive regulation of cellular protein localization	49/1445	295/18862	2.11676e-07	3.86821e-05	3.27109e-05	PTN/ZIC1/YWHAH/PRNP/HSP90AB1/CNST/CDK5RAP3/PPP3R1/RACK1/KCNB1/CEMIP/C2CD5/NPTN/CLIP3/GNL3L/STOM/CCT7/ZDHHC8/YWHAG/FERMT2/RTN4/SLC5A3/AP2B1/GPR137B/FYN/YWHAE/NECAB2/PARD6A/SMAD3/BAG3/UBL5/FIS1/BAP1/TFRC/DMAP1/ROCK2/FLNA/SQSTM1/RHOG/PPP1R13B/ANK3/RAN/RAB11A/HRAS/TESK1/STX3/HPCA/SORL1/STAC2	49
BP	GO:0045333	cellular respiration	36/1445	187/18862	2.27804e-07	4.03285e-05	3.41032e-05	NDUFA4/UQCR10/NDUFC2/NDUFA5/CHCHD2/NDUFB4/NDUFV1/COX5A/COX4I1/COX7C/BNIP3/PDHB/NDUFA10/NDUFB5/SLC25A18/COX8A/NDUFS8/ACO1/NDUFS7/NDUFB8/ISCU/SDHD/SDHC/MDH1/SDHA/ETFDH/MDH2/OGDHL/PPARGC1A/NDUFB10/DLD/OGDH/MTFR1L/NDUFS5/CS/NDUFB7	36
BP	GO:1905477	positive regulation of protein localization to membrane	28/1445	127/18862	2.79586e-07	4.79956e-05	4.05868e-05	PTN/YWHAH/PRNP/CNST/PPP3R1/RACK1/KCNB1/CEMIP/C2CD5/CLIP3/STOM/ZDHHC8/YWHAG/SLC5A3/AP2B1/FYN/YWHAE/NECAB2/FIS1/SQSTM1/RHOG/PPP1R13B/ANK3/RAB11A/HRAS/STX3/HPCA/STAC2	28
BP	GO:0042775	mitochondrial ATP synthesis coupled electron transport	24/1445	99/18862	3.08168e-07	5.13463e-05	4.34202e-05	NDUFA4/UQCR10/NDUFC2/NDUFA5/CHCHD2/NDUFB4/NDUFV1/COX5A/COX4I1/COX7C/NDUFA10/NDUFB5/COX8A/NDUFS8/NDUFS7/NDUFB8/ISCU/SDHD/SDHC/SDHA/NDUFB10/DLD/NDUFS5/NDUFB7	24
BP	GO:0021762	substantia nigra development	15/1445	43/18862	3.32361e-07	5.3795e-05	4.5491e-05	PLP1/ACTB/GLUD1/CKB/YWHAH/CALM1/DYNLL1/NDRG2/ZNF430/CCDC14/S100A1/YWHAE/CALM3/CALM2/ZNF148	15
BP	GO:0042773	ATP synthesis coupled electron transport	24/1445	100/18862	3.76357e-07	5.83335e-05	4.93289e-05	NDUFA4/UQCR10/NDUFC2/NDUFA5/CHCHD2/NDUFB4/NDUFV1/COX5A/COX4I1/COX7C/NDUFA10/NDUFB5/COX8A/NDUFS8/NDUFS7/NDUFB8/ISCU/SDHD/SDHC/SDHA/NDUFB10/DLD/NDUFS5/NDUFB7	24
BP	GO:0015800	acidic amino acid transport	19/1445	67/18862	3.869e-07	5.83335e-05	4.93289e-05	SLC1A3/RAB3A/TSPOAP1/GJA1/CCK/ARL6IP5/KCNJ10/SNAP25/ATP1A2/SLC38A2/SLC7A11/SLC25A18/SLC1A2/CPLX1/VAMP2/STX1A/SYT1/ARL6IP1/ADORA1	19
BP	GO:0023061	signal release	68/1445	475/18862	3.91503e-07	5.83335e-05	4.93289e-05	CAMK2A/CHGA/CAMK2N1/RAB3A/GLUD1/SPP1/PRRT2/CALM1/TSPOAP1/STXBP4/GJA1/NAPB/PFKL/NCS1/PRKCB/VSNL1/DYNLL1/SNAP25/RAPGEF4/KCNB1/SNCG/PTPRN/RPH3A/GAD2/SYT13/CPLX1/SYP/MEF2C/GNAS/PTPN11/CHRNA5/IL1B/PRKCG/BACE1/CALM3/GRM4/LYN/VAMP2/STX1A/FKBP1B/SV2A/RAC1/HMGN3/SNCAIP/SYT1/SNX19/CACNA1C/HTR2A/SLC44A4/RASL10B/TM7SF3/KCNA5/ADORA1/SCG5/BRSK2/SLC25A6/PTPRN2/NNAT/NADK/PIP5K1C/STX3/NLGN1/CADPS2/SYT4/SLC32A1/DO…	68
BP	GO:0000302	response to reactive oxygen species	40/1445	224/18862	4.0159e-07	5.83335e-05	4.93289e-05	MT3/APOE/HBB/MAPK3/SIRPA/APOD/PLEKHA1/GPR37/ZNF580/CYP1B1/SOD1/RPS3/AQP1/HP/RACK1/BNIP3/PTPRN/HBA1/HBA2/EEF2/FYN/GNAO1/KLF4/FOXO1/FKBP1B/CAMKK2/NET1/MAP3K5/KLF2/KCNA5/PPARGC1A/DUSP1/ANKZF1/LDHA/PDGFRB/NQO1/SOD3/TRA2B/PTK2B/ANXA1	40
BP	GO:0086064	cell communication by electrical coupling involved in cardiac conduction	11/1445	24/18862	5.0375e-07	7.13078e-05	6.03004e-05	ATP1A3/CALM1/GJA1/ATP1A2/ATP1B1/ATP1A1/ATP1B2/CALM3/FKBP1B/CALM2/CACNA1C	11
BP	GO:0099504	synaptic vesicle cycle	34/1445	177/18862	5.16085e-07	7.13078e-05	6.03004e-05	RAB3A/PRRT2/CALM1/NAPB/NCS1/PRKCB/SNAP25/RAPGEF4/SH3GL2/SNCG/KIAA1109/CPLX1/GRIPAP1/SYP/CANX/CDH2/CHRNA5/PRKCG/BACE1/CALM3/VAMP2/STX1A/SV2A/SYT1/HTR2A/NLGN4X/BSN/BRSK2/PIP5K1C/STX3/NLGN1/CADPS2/SLC32A1/DOC2A	34
BP	GO:0046034	ATP metabolic process	50/1445	313/18862	5.4097e-07	7.28352e-05	6.15921e-05	ALDOC/ATP6V0C/HSPA1B/NDUFA4/ATP6V1B2/PFKP/ENO2/UQCR10/PFKL/NDUFC2/HDAC4/ZBTB7A/NDUFA5/CHCHD2/NDUFB4/ATP1A2/NDUFV1/ATP1B1/COX5A/COX4I1/COX7C/NDUFA10/GAPDH/NDUFB5/COX8A/ENO1/NDUFS8/NDUFS7/TPI1/NDUFB8/PGM2L1/ISCU/FIS1/AK1/SDHD/SDHC/SPHK2/MYH7/SDHA/HTR2A/OGDHL/PPARGC1A/NDUFB10/DLD/OGDH/LDHA/NDUFS5/NADK/STOML2/NDUFB7	50
BP	GO:0015980	energy derivation by oxidation of organic compounds	46/1445	278/18862	5.52854e-07	7.28352e-05	6.15921e-05	MT3/NDUFA4/CALM1/UQCR10/ACADVL/NDUFC2/NDUFA5/CHCHD2/NDUFB4/NDUFV1/COX5A/COX4I1/COX7C/BNIP3/PDHB/NDUFA10/NDUFB5/SLC25A18/COX8A/NDUFS8/ACO1/NDUFS7/GNAS/NDUFB8/PGM2L1/ISCU/EPM2AIP1/SDHD/PPP1CC/PPP1R3C/SDHC/UGP2/MDH1/SDHA/ETFDH/MDH2/PPP1R2/OGDHL/PPARGC1A/NDUFB10/DLD/OGDH/MTFR1L/NDUFS5/CS/NDUFB7	46
BP	GO:1905475	regulation of protein localization to membrane	36/1445	194/18862	5.80571e-07	7.47485e-05	6.321e-05	ACTB/PTN/YWHAH/PRNP/CNST/GDI1/PPP3R1/RACK1/KCNB1/CEMIP/C2CD5/CLIP3/STOM/TMEM59/SLC7A11/ZDHHC8/YWHAG/TMBIM1/SLC5A3/AP2B1/FYN/GRIPAP1/YWHAE/NECAB2/CDH2/FIS1/SQSTM1/RHOG/PPP1R13B/ANK3/CLTC/RAB11A/HRAS/STX3/HPCA/STAC2	36
BP	GO:1903793	positive regulation of anion transport	67/1445	478/18862	1.02664e-06	0.000129243	0.000109293	CAMK2N1/ACTB/APOE/GLUD1/SPP1/ZIC1/YWHAH/PRNP/HSP90AB1/GJA1/VSNL1/CNST/CCK/DYNLL1/PPP3R1/RACK1/KCNB1/CEMIP/C2CD5/CLIP3/MYH10/STOM/PCNT/ZDHHC8/YWHAG/FYN/NFKBIA/YWHAE/PARD6A/PTPN11/SMAD3/BAG3/IL1B/UBL5/VAMP2/STX1A/FIS1/BAP1/RAC1/DMAP1/SYT1/ADIPOR2/ARL6IP1/S100A8/FABP3/FLNA/PPP1R13B/ANK3/RAN/RASL10B/TM7SF3/ADORA1/EMD/CA2/ACSL5/KHDRBS1/NNAT/CEBPB/NADK/HRAS/SAR1A/APBB3/HPCA/TLR2/SORL1/C3/OAZ1	67
BP	GO:0010644	cell communication by electrical coupling	12/1445	31/18862	1.39509e-06	0.000171809	0.000145288	ATP1A3/CALM1/GJA1/ATP1A2/ATP1B1/ATP1A1/ATP1B2/CALM3/FKBP1B/CALM2/CACNA1C/ANK3	12
BP	GO:0009060	aerobic respiration	21/1445	86/18862	1.46778e-06	0.000176915	0.000149605	NDUFA4/UQCR10/COX5A/COX4I1/COX7C/BNIP3/PDHB/COX8A/NDUFS8/ACO1/NDUFS7/SDHD/SDHC/MDH1/SDHA/MDH2/OGDHL/DLD/OGDH/MTFR1L/CS	21
BP	GO:0048857	neural nucleus development	17/1445	60/18862	1.59452e-06	0.000188186	0.000159137	PLP1/ACTB/GLUD1/CKB/YWHAH/CALM1/DYNLL1/NDRG2/ZNF430/CCDC14/S100A1/YWHAE/CALM3/CALM2/ARX/ALDH1A3/ZNF148	17
BP	GO:0022900	electron transport chain	33/1445	178/18862	1.72821e-06	0.000199802	0.000168959	NDUFA4/UQCR10/NDUFC2/PHGDH/NDUFA5/CHCHD2/NDUFB4/NDUFV1/COX5A/COX4I1/COX7C/NDUFA10/NDUFB5/SLC25A18/COX8A/NDUFS8/NDUFS7/QDPR/ALDH2/NDUFB8/ISCU/ALDH4A1/SDHD/SDHC/SDHA/ETFDH/AKR7A2/PPARGC1A/NDUFB10/DLD/NDUFS5/AKR1B1/NDUFB7	33
BP	GO:0033157	regulation of intracellular protein transport	41/1445	248/18862	2.29679e-06	0.000260226	0.000220056	ZIC1/YWHAH/PRNP/HSP90AB1/APOD/GDI1/PPP3R1/KCNB1/CEMIP/C2CD5/STOM/CABP1/PCNT/YWHAG/FYN/GRIPAP1/YWHAE/PTPN11/SMAD3/BAG3/IL1B/UBL5/VAMP2/FIS1/BAP1/DMAP1/FLNA/PPP1R13B/ANK3/RAN/EMD/BRSK2/UBE2J1/IFI27/HRAS/SAR1A/HPCA/SORL1/OAZ1/ERLEC1/SP100	41
BP	GO:0035966	response to topologically incorrect protein	36/1445	206/18862	2.53407e-06	0.000277219	0.000234427	CLU/HSPA1B/HSP90AB1/TMBIM6/TPP1/ACADVL/CDK5RAP3/RACK1/HSPA6/KLHDC3/OPTN/MANF/HSPA9/SDF2L1/HSPB8/DNAJA1/BAG6/CANX/SEC31A/HSPB1/BAG3/PPP2R5B/THBS4/MFN2/WFS1/ADD1/ERMP1/TM7SF3/DDIT3/ERO1A/FICD/DNAJB1/EXTL3/RNF175/DDX11/HDGF	36
BP	GO:0042274	ribosomal small subunit biogenesis	19/1445	75/18862	2.54464e-06	0.000277219	0.000234427	RPL38/RPS14/RPS24/RPS25/RPS27/RPSA/RPS6/RPS10/RPS21/XRCC5/RPS27L/RPS8/RPS7/NPM1/RPS28/NAT10/SNU13/TSR2/RPS19	19
BP	GO:0008380	RNA splicing	66/1445	481/18862	2.59977e-06	0.000277881	0.000234986	FAM98B/CELF5/RPS26/PPP2R1A/TMBIM6/SRRM1/ZBTB7A/SLC38A2/RRAGC/TRA2A/U2AF1/YBX1/SRSF5/POLR2I/POLR2F/PDCD7/SNRNP70/RBM14/PPP2CA/SNRPD3/PCBP1/YTHDC1/SART1/UBL5/DDX17/SRSF11/SF1/SUGP2/RBM3/CWF19L2/DDX1/TTF2/WDR33/POLR2L/SNU13/KHSRP/U2SURP/FIP1L1/PRKRIP1/CLNS1A/DYRK1A/SREK1/GTF2F1/PPARGC1A/POLR2J/SNRNP25/PCBP4/HNRNPM/PHF5A/GPKOW/RTCB/KHDRBS1/HABP4/FXR1/RNF113A/HNRNPH3/PRPF6/POLR2A/CELF6/GCFC2/DDX5/TRA2…	66
BP	GO:0071900	regulation of protein serine/threonine kinase activity	67/1445	492/18862	2.8474e-06	0.000298713	0.000252603	ACTB/PEA15/APOE/SYAP1/MAPK3/CCNI/CALM1/RGS4/PPP2R1A/CIT/HSP90AB1/UBC/DUSP3/UBA52/SOD1/RPS3/CDK5RAP3/SPRED1/DUSP8/DUSP19/CEMIP/STK39/UBB/MAPK8IP3/YWHAG/FERMT2/ALS2/MAPK8IP1/UCHL1/PPP2CA/DNAJA1/UBE2V1/HSPB1/PTPN11/IL1B/GADD45G/RASIP1/CALM3/GRM4/LYN/IGFBP6/KIT/CALM2/MAP4K2/PLCE1/MAP3K5/MAP3K12/HTR2A/LTF/RGCC/DUSP6/DUSP1/PSRC1/PDGFA/HRAS/PRKAR2B/TESK1/GPS1/CD74/PDGFRB/PDE6H/PTK2B/SORL1/CCND2/MAP2K1/S…	67
BP	GO:0035304	regulation of protein dephosphorylation	28/1445	142/18862	2.98888e-06	0.000302438	0.000255753	PTN/CALM1/PPP2R1A/HSP90AB1/GNAI2/SET/PPP3R1/RCAN2/DUSP26/FKBP1A/NUAK1/PPP2R2C/YWHAE/PPP2R5B/CALM3/PPP4R1/FKBP1B/ROCK2/CALM2/PPP2R3B/PPP2R2B/PPP1R2/PPP2R5E/ADORA1/PHACTR1/RCAN1/PDGFRB/CRY2	28
BP	GO:0016079	synaptic vesicle exocytosis	23/1445	104/18862	2.98968e-06	0.000302438	0.000255753	RAB3A/PRRT2/CALM1/NAPB/NCS1/PRKCB/SNAP25/CPLX1/SYP/CHRNA5/PRKCG/BACE1/CALM3/VAMP2/STX1A/SV2A/SYT1/HTR2A/PIP5K1C/STX3/NLGN1/CADPS2/DOC2A	23
BP	GO:0043666	regulation of phosphoprotein phosphatase activity	25/1445	119/18862	3.04651e-06	0.000302781	0.000256042	PTN/CALM1/PPP2R1A/HSP90AB1/GNAI2/SET/PPP3R1/RCAN2/FKBP1A/NUAK1/PPP2R2C/PPP2R5B/CALM3/PPP4R1/FKBP1B/ROCK2/CALM2/PPP2R3B/PPP2R2B/PPP1R2/PPP2R5E/PHACTR1/RCAN1/PDGFRB/CRY2	25
BP	GO:0070997	neuron death	51/1445	342/18862	3.3697e-06	0.000329127	0.000278321	MT3/CHGA/CLU/APOE/PRNP/CIT/HSP90AB1/ELK1/HDAC4/ARL6IP5/SET/SOD1/RACK1/KCNB1/SNCG/SCN2A/FAIM2/BNIP3/CHMP4B/PTPRZ1/UBB/SLC7A11/GAPDH/AP2B1/FYN/CRLF1/XIAP/VPS35/MEF2C/C1QA/PRKCG/BACE1/GRM4/TRIM2/WFS1/MAP3K5/MAP3K12/PPP1R13B/CTSZ/SLC9A1/CSF3/DDIT3/PPARGC1A/ADORA1/NEFL/CEBPB/HRAS/NAE1/NQO1/PTK2B/SORL1	51
BP	GO:0010038	response to metal ion	52/1445	352/18862	3.58421e-06	0.000344145	0.000291021	MT1F/MT3/SPARC/MAPK3/CALM1/MT1G/MT2A/MT1H/PRNP/AHCYL1/JUND/GDI1/SOD1/FOSB/AQP1/S100A13/MT1X/PAM/BNIP3/ACO1/SYT13/PPP2CA/SLC30A3/B2M/SEC31A/MEF2C/QDPR/C1QA/RASAL1/BACE1/CALM3/CLIC4/CPNE6/KIT/SYT1/S100A8/CALM2/ADD1/ANK3/CYBRD1/PPARGC1A/CA2/DUSP1/PEF1/GPHN/HOMER1/NQO1/HPCA/SOD3/PTK2B/NLGN1/SYT4	52
BP	GO:1903311	regulation of mRNA metabolic process	50/1445	334/18862	3.74852e-06	0.000352892	0.000298418	CELF5/PSMA7/PSMC5/ALKBH5/AHCYL1/VIM/UBC/SERBP1/UBA52/ZBTB7A/SET/TRA2A/UBB/YBX1/LARP1/EXOSC2/PUM1/SNRNP70/PSMD11/PSMB3/HSPB1/TAF15/YTHDC1/SAFB2/DDX17/PSMC3/SF1/RBM3/NPM1/ROCK2/PSMA1/PSMA6/RNF40/KHSRP/DYRK1A/PCBP4/HNRNPM/KHDRBS1/FXR1/PSMD4/CELF6/PSMC4/DDX5/TRA2B/SRSF4/PSMB5/RBM15/ANP32A/TNRC6B/FUS	50
BP	GO:0010921	regulation of phosphatase activity	32/1445	176/18862	3.79989e-06	0.000352892	0.000298418	PTN/CALM1/PPP2R1A/LMTK3/HSP90AB1/CNST/GNAI2/SET/CDK5RAP3/SPRED1/PPP3R1/RIMBP2/RCAN2/FKBP1A/NUAK1/PPP2R2C/MEF2C/SMAD3/PPP2R5B/CALM3/PPP4R1/FKBP1B/ROCK2/CALM2/PPP2R3B/PPP2R2B/PPP1R2/PPP2R5E/PHACTR1/RCAN1/PDGFRB/CRY2	32
BP	GO:0016241	regulation of macroautophagy	30/1445	160/18862	3.96652e-06	0.000362425	0.000306479	ATP6V0C/ATP6V1B2/MAPK3/ATP6V1E1/ATP6V0A1/SMG1/ATP6V1D/RRAGC/FEZ1/BNIP3/CHMP4B/FEZ2/OPTN/LARP1/ATP6V0B/GAPDH/CAPN1/UCHL1/DCN/RRAGD/HSPB8/VPS26A/VPS35/BAG3/UBQLN2/FYCO1/ATP6V1H/ATG101/SCOC/PIP4K2A	30
BP	GO:0006986	response to unfolded protein	33/1445	185/18862	4.14799e-06	0.000369004	0.000312043	HSPA1B/HSP90AB1/TMBIM6/TPP1/ACADVL/CDK5RAP3/RACK1/HSPA6/KLHDC3/OPTN/MANF/HSPA9/HSPB8/DNAJA1/CANX/SEC31A/HSPB1/BAG3/PPP2R5B/THBS4/MFN2/WFS1/ADD1/ERMP1/TM7SF3/DDIT3/ERO1A/FICD/DNAJB1/EXTL3/RNF175/DDX11/HDGF	33
BP	GO:0032388	positive regulation of intracellular transport	37/1445	219/18862	4.20198e-06	0.000369004	0.000312043	ZIC1/YWHAH/PRNP/HSP90AB1/DYNC1H1/CALY/MAP2/PPP3R1/KCNB1/CEMIP/C2CD5/FEZ1/STOM/PCNT/YWHAG/FYN/YWHAE/SMAD3/BAG3/IL1B/UBL5/VAMP2/FIS1/BAP1/DMAP1/FLNA/PPP1R13B/ANK3/RAN/MLC1/EMD/KHDRBS1/HRAS/SAR1A/HPCA/SORL1/OAZ1	37
BP	GO:0042255	ribosome assembly	17/1445	64/18862	4.23394e-06	0.000369004	0.000312043	RPL38/RPL24/RPL11/RPS14/RPL5/RPS27/RPSA/RPL23A/RPS10/XRCC5/RPS27L/RPL3/NPM1/RPS28/SBDS/RPS19/RPF2	17
BP	GO:0036376	sodium ion export across plasma membrane	8/1445	15/18862	4.59534e-06	0.000394434	0.000333547	ATP1A3/ATP1A2/ATP1B1/ATP1A1/ATP1B3/ATP1B2/SLC9A1/FXYD1	8
BP	GO:0050808	synapse organization	58/1445	412/18862	4.70777e-06	0.000394984	0.000334013	SPARC/RAB3A/ACTB/PTN/GPM6A/APOE/PDLIM5/NEFH/TUBA1A/GAP43/PRNP/SPARCL1/RELN/CLSTN1/SLITRK4/SNCG/PCDHB9/NPTN/GABRA1/MYH10/NRCAM/NFIA/SLC7A11/SIPA1L1/SNTA1/DNER/FYN/GRIPAP1/SLITRK2/VPS35/CAST/MEF2C/C1QA/CDH2/BCAN/C1QC/FLNA/CACNB4/ANK3/GLRB/GNPAT/NLGN4X/FLRT3/BSN/OPA1/LRFN3/COL4A5/NEFL/ARHGAP33/GPHN/DSCAM/NOS1AP/TANC2/HOMER1/TLR2/NLGN1/CNKSR2/C3	58
BP	GO:0016049	cell growth	64/1445	470/18862	4.74121e-06	0.000394984	0.000334013	FAM107A/MT3/APOE/HSPA1B/LLPH/SPP1/PDLIM5/RGS4/PPP2R1A/DIP2B/HSP90AB1/GJA1/GDI1/CLSTN1/MAP2/COBL/BTG1/VGLL4/RACK1/SH3GL2/SPOCK1/NRCAM/SHTN1/KIAA1109/EXOSC2/RTN4/OLFM1/ENO1/PPP2CA/DCLK1/IGFBP4/SMAD3/RASAL1/CPNE6/BAP1/SYT1/ULK2/EPB41L3/ADIPOR2/SPHK2/S100A8/FHL1/PAK6/NET1/PLCE1/AUTS2/IGFBP5/SMARCA4/SLC9A1/RBBP7/SLC44A4/SGK1/FLRT3/PSRC1/NDN/DSCAM/RAB11A/CHPT1/CGRRF1/EXTL3/PTK2B/SLC9A6/SYT4/FRZB	64
BP	GO:0014047	glutamate secretion	13/1445	40/18862	5.02066e-06	0.000412203	0.000348574	SLC1A3/RAB3A/TSPOAP1/GJA1/CCK/SNAP25/SLC38A2/SLC1A2/CPLX1/VAMP2/STX1A/SYT1/ADORA1	13
BP	GO:0043620	regulation of DNA-templated transcription in response to stress	24/1445	115/18862	5.38522e-06	0.000435818	0.000368543	MT3/PSMA7/PSMC5/TMBIM6/RBPJ/UBC/UBA52/UBB/PSMD11/PSMB3/VHL/BAG3/PSMC3/PSMA1/PSMA6/KLF2/DDIT3/BCLAF1/HIGD1A/CEBPB/PSMD4/DNAJB1/PSMC4/PSMB5	24
BP	GO:0098876	vesicle-mediated transport to the plasma membrane	21/1445	93/18862	5.62032e-06	0.000448438	0.000379215	BLZF1/CNST/CLSTN1/SNAP25/RAB10/RACK1/OPTN/EXOC6B/RABEP1/CPLX1/GRIPAP1/VPS26A/VPS35/NSF/VAMP2/ANK3/ANKRD27/RAB26/RAB11A/STX3/VAMP5	21
BP	GO:0017157	regulation of exocytosis	34/1445	197/18862	6.31689e-06	0.000497017	0.000420295	RAB3A/CALM1/NCS1/PRKCB/VSNL1/GNAI2/RAPGEF4/RAB10/KCNB1/RAB15/IL4R/SYT13/CPLX1/SYP/CHRNA5/PRKCG/NSF/BACE1/CALM3/LYN/VAMP2/STX1A/SYT1/SPHK2/HTR2A/RAB26/RALA/NLGN1/CADPS2/SYT4/IL13RA2/DOC2A/ANXA1/LGI3	34
BP	GO:0043618	regulation of transcription from RNA polymerase II promoter in response to stress	23/1445	109/18862	6.91834e-06	0.000534891	0.000452323	MT3/PSMA7/PSMC5/TMBIM6/RBPJ/UBC/UBA52/UBB/PSMD11/PSMB3/VHL/BAG3/PSMC3/PSMA1/PSMA6/KLF2/DDIT3/HIGD1A/CEBPB/PSMD4/DNAJB1/PSMC4/PSMB5	23
BP	GO:0022898	regulation of transmembrane transporter activity	42/1445	268/18862	6.98711e-06	0.000534891	0.000452323	ACTB/YWHAH/CALM1/PRNP/AHCYL1/GJA1/RELN/ATP1A2/ATP1B1/GRIA2/CACNG3/STK39/ATP1B3/ATP1B2/STOM/FKBP1A/CAPN1/CNIH2/GRIN1/YWHAE/MEF2C/CALM3/VAMP2/FKBP1B/SPHK2/CALM2/CACNB4/FHL1/ANK3/SLC9A1/TESC/PPARGC1A/NEFL/NOS1AP/FXYD1/HOMER1/HPCA/PIM1/PTK2B/NLGN1/FXYD7/STAC2	42
BP	GO:0015908	fatty acid transport	28/1445	150/18862	8.97872e-06	0.000678193	0.000573504	SLC1A3/RAB3A/APOE/PNPLA8/TSPOAP1/GJA1/CCK/ARL6IP5/KCNJ10/SNAP25/ATP1A2/SLC38A2/FABP5/SLC7A11/SLC25A18/SLC1A2/CPLX1/IL1B/VAMP2/STX1A/FIS1/SYT1/ARL6IP1/FABP3/ADORA1/ACSL5/PLIN2/ANXA1	28
BP	GO:0046688	response to copper ion	13/1445	42/18862	9.21303e-06	0.00067855	0.000573806	MT1F/MT3/MT1G/MT2A/MT1H/PRNP/SOD1/AQP1/S100A13/MT1X/PAM/BACE1/SOD3	13
BP	GO:0007409	axonogenesis	62/1445	460/18862	9.22301e-06	0.00067855	0.000573806	MT3/RAB3A/ACTB/TUBB2B/APOE/CHN1/RPL24/SPP1/NEFH/MAPK3/GAP43/DIP2B/HSP90AB1/S100A6/RELN/GDI1/MARK2/CCK/MAP2/SLITRK4/RAB10/COBL/RAP1GAP/FEZ1/NPTN/FEZ2/NRCAM/SHTN1/POU3F2/SIPA1L1/RTN4/OLFM1/FYN/VASP/EVL/SLITRK2/DCLK1/CDH2/PTPN11/SPTAN1/EPHB6/RAC1/CRMP1/ULK2/FZD3/AUTS2/RHOG/ANK3/FLRT3/NDN/PALLD/DOK4/BRSK2/NEFL/ARX/DSCAM/RAB11A/NRXN3/PTPRO/SLC9A6/MAP2K1/NEO1	62
BP	GO:0042391	regulation of membrane potential	59/1445	431/18862	9.38764e-06	0.000681807	0.000576561	PTN/GNA11/ATP1A3/IFI6/YWHAH/CALM1/RGS4/GJA1/RELN/CCK/ARL6IP5/SOD1/KCNJ10/ATP1A2/ATP1B1/SCN11A/RACK1/KCNB1/SCN2A/ATP1A1/BNIP3/GABRA1/UBB/ATP1B3/KCNK12/ATP1B2/SNTA1/CNIH2/DCN/GRIN1/SCN1A/YWHAE/MEF2C/CHRNA5/CALM3/MLLT11/STX1A/FKBP1B/KCND2/FLNA/CACNB4/FHL1/GABBR1/CACNA1C/ANK3/SLC9A1/GLRB/MPP2/KCNA5/ADORA1/NLGN4X/DLD/NOS1AP/FXYD1/STOML2/PTK2B/NLGN1/MYH14/KCNH3	59
BP	GO:0035303	regulation of dephosphorylation	35/1445	210/18862	1.02808e-05	0.000737221	0.000623421	PTN/CALM1/PPP2R1A/LMTK3/HSP90AB1/CNST/GNAI2/SET/CDK5RAP3/SPRED1/PPP3R1/RIMBP2/RCAN2/DUSP26/FKBP1A/NUAK1/PPP2R2C/YWHAE/MEF2C/SMAD3/PPP2R5B/CALM3/PPP4R1/FKBP1B/ROCK2/CALM2/PPP2R3B/PPP2R2B/PPP1R2/PPP2R5E/ADORA1/PHACTR1/RCAN1/PDGFRB/CRY2	35
BP	GO:0048167	regulation of synaptic plasticity	31/1445	176/18862	1.04562e-05	0.000740433	0.000626137	FAM107A/CAMK2A/RAB3A/PTN/APOE/PRRT2/YWHAH/RELN/NRGN/KCNJ10/SNAP25/KCNB1/NPTN/YWHAG/SIPA1L1/GRIN1/SYP/MEF2C/CALB1/VAMP2/KIT/ABHD6/SQSTM1/CALB2/MPP2/ADORA1/RAB11A/HRAS/STX3/PTK2B/NLGN1	31
BP	GO:0006120	mitochondrial electron transport, NADH to ubiquinone	15/1445	55/18862	1.08653e-05	0.000759902	0.0006426	NDUFA4/NDUFC2/NDUFA5/NDUFB4/NDUFV1/NDUFA10/NDUFB5/NDUFS8/NDUFS7/NDUFB8/ISCU/NDUFB10/DLD/NDUFS5/NDUFB7	15
BP	GO:0000028	ribosomal small subunit assembly	9/1445	21/18862	1.11734e-05	0.000771919	0.000652763	RPL38/RPS14/RPS27/RPSA/RPS10/XRCC5/RPS27L/RPS28/RPS19	9
BP	GO:1990778	protein localization to cell periphery	48/1445	329/18862	1.17731e-05	0.000796405	0.000673469	RAB3A/ACTB/BLZF1/RAMP1/CNST/CLSTN1/ARL6IP5/SNAP25/ATP1B1/RAB10/RACK1/KCNB1/C2CD5/CLIP3/CACNG3/OPTN/ATP1B3/RAB15/RAB40C/TMEM59/ZDHHC8/ZDHHC23/TMBIM1/RABEP1/CPLX1/GRIPAP1/VPS35/CDH2/NSF/DENND4C/VAMP2/ROCK2/EPB41L3/FLNA/SQSTM1/RHOG/ANK3/TESC/CLTC/RAB26/GPHN/RAB11A/HRAS/ZDHHC22/STX3/VAMP5/STAC2/ABCA2	48
BP	GO:0006979	response to oxidative stress	60/1445	444/18862	1.1809e-05	0.000796405	0.000673469	MT3/APOE/HSPA1B/HBB/MAPK3/PRNP/SIRPA/APOD/PLEKHA1/GPR37/ZNF580/CYP1B1/ARL6IP5/SOD1/RPS3/AQP1/CHCHD2/MSRB3/HP/NDUFB4/RACK1/BNIP3/PTPRN/HBA1/HBA2/SLC7A11/EEF2/NDUFS8/FYN/GNAO1/HSPB1/GPX4/KLF4/FOXO1/FKBP1B/MGST1/CAMKK2/NET1/ETFDH/GPX3/MAP3K5/KLF2/ERMP1/KCNA5/PPARGC1A/ERO1A/DUSP1/PNKP/HNRNPM/ANKZF1/LDHA/PDGFRB/NQO1/SOD3/TRA2B/PTK2B/AIF1/PSMB5/ANXA1/NAPRT	60
BP	GO:0032409	regulation of transporter activity	43/1445	283/18862	1.20586e-05	0.000803672	0.000679614	ACTB/YWHAH/CALM1/PRNP/AHCYL1/GJA1/RELN/ATP1A2/ATP1B1/GRIA2/CACNG3/STK39/ATP1B3/ATP1B2/STOM/FKBP1A/CAPN1/CNIH2/GRIN1/YWHAE/MEF2C/CALM3/VAMP2/FKBP1B/SPHK2/CALM2/CACNB4/FHL1/ANK3/SLC9A1/TESC/SGK1/PPARGC1A/NEFL/NOS1AP/FXYD1/HOMER1/HPCA/PIM1/PTK2B/NLGN1/FXYD7/STAC2	43
BP	GO:0055067	monovalent inorganic cation homeostasis	29/1445	161/18862	1.28156e-05	0.000844188	0.000713876	ATP1A3/ATP6V0C/ATP6V1B2/MAPK3/ATP6V1E1/ATP6V0A1/TMEM9/GNAI2/ATP6V1D/KCNJ10/ATP1A2/ATP1B1/ATP1A1/PDK4/ATP1B3/ATP1B2/ATP6V0B/CCKBR/TMEM175/CLIC4/SLC26A4/ATP6V1H/SLC9A1/SLC12A7/KCNA5/ADORA1/CA2/ATP6AP2/SLC9A6	29
BP	GO:1904062	regulation of cation transmembrane transport	49/1445	340/18862	1.34092e-05	0.000870191	0.000735864	PLP1/YWHAH/CALM1/RGS4/PRNP/RELN/ATP1A2/ATP1B1/GRIA2/CEMIP/APLNR/CACNG3/STK39/ATP1B3/ATP1B2/STOM/FKBP1A/SNTA1/CAPN1/CNIH2/FYN/GRIN1/YWHAE/MEF2C/CALM3/LYN/ISCU/VAMP2/FKBP1B/SPHK2/CALM2/FLNA/CACNB4/FHL1/CACNA1C/ANK3/SLC9A1/TESC/KCNIP1/PPARGC1A/NEFL/NOS1AP/FXYD1/HOMER1/HPCA/PTK2B/NLGN1/FXYD7/STAC2	49
BP	GO:0051222	positive regulation of protein transport	46/1445	312/18862	1.35175e-05	0.000870191	0.000735864	CAMK2N1/GLUD1/ZIC1/YWHAH/PRNP/HSP90AB1/GJA1/VSNL1/CNST/DYNLL1/PPP3R1/RACK1/KCNB1/CEMIP/C2CD5/MYH10/STOM/PCNT/YWHAG/FYN/YWHAE/PARD6A/SMAD3/BAG3/IL1B/UBL5/VAMP2/FIS1/BAP1/RAC1/DMAP1/FLNA/PPP1R13B/ANK3/RAN/TM7SF3/EMD/NNAT/NADK/HRAS/SAR1A/APBB3/HPCA/TLR2/SORL1/OAZ1	46
BP	GO:0050890	cognition	42/1445	276/18862	1.46021e-05	0.000929447	0.000785974	FAM107A/PTN/PJA2/APOE/PRNP/NPTX2/NRGN/CCK/ARL6IP5/SNAP25/ATP1A2/SCN2A/NPTN/PTPRZ1/NDRG4/SLC7A11/FYN/PTCHD1/GPR155/GRIN1/B2M/MEF2C/PRKCG/BRINP1/CALB1/KIT/PAK6/HTR2A/SGK1/ADORA1/NLGN4X/JAKMIP1/CIC/CEBPB/STRA6/ADCY3/PRKAR2B/LDLR/PLCB1/NRXN3/TLR2/TTC8	42
BP	GO:0090316	positive regulation of intracellular protein transport	31/1445	179/18862	1.48329e-05	0.000933651	0.000789528	ZIC1/YWHAH/PRNP/HSP90AB1/PPP3R1/KCNB1/CEMIP/C2CD5/STOM/PCNT/YWHAG/FYN/YWHAE/SMAD3/BAG3/IL1B/UBL5/VAMP2/FIS1/BAP1/DMAP1/FLNA/PPP1R13B/ANK3/RAN/EMD/HRAS/SAR1A/HPCA/SORL1/OAZ1	31
BP	GO:0043407	negative regulation of MAP kinase activity	18/1445	77/18862	1.55524e-05	0.000957654	0.000809826	APOE/RGS4/PPP2R1A/DUSP3/CDK5RAP3/SPRED1/DUSP8/DUSP19/MAPK8IP1/UCHL1/PPP2CA/DNAJA1/IL1B/LYN/DUSP6/DUSP1/GPS1/SORL1	18
BP	GO:0046209	nitric oxide metabolic process	18/1445	77/18862	1.55524e-05	0.000957654	0.000809826	CLU/HBB/DDAH1/HSP90AB1/SIRPA/CYP1B1/DYNLL1/SMAD3/IL1B/KLF4/RAC1/ROCK2/KLF2/KHSRP/NOS1AP/NQO1/TLR2/PTK2B	18
BP	GO:1901798	positive regulation of signal transduction by p53 class mediator	9/1445	22/18862	1.76242e-05	0.00107356	0.00090784	RPL11/CHD5/CDK5RAP3/SPRED1/UBB/RPL26/RPS7/RPL23/DDX5	9
BP	GO:0046928	regulation of neurotransmitter secretion	19/1445	85/18862	1.80592e-05	0.00108836	0.000920353	CAMK2A/RAB3A/CALM1/NCS1/PRKCB/SNCG/CPLX1/SYP/MEF2C/CHRNA5/PRKCG/BACE1/CALM3/STX1A/SNCAIP/SYT1/HTR2A/NLGN1/SYT4	19
BP	GO:2001057	reactive nitrogen species metabolic process	18/1445	78/18862	1.87863e-05	0.00112026	0.00094733	CLU/HBB/DDAH1/HSP90AB1/SIRPA/CYP1B1/DYNLL1/SMAD3/IL1B/KLF4/RAC1/ROCK2/KLF2/KHSRP/NOS1AP/NQO1/TLR2/PTK2B	18
BP	GO:0043405	regulation of MAP kinase activity	45/1445	307/18862	1.93796e-05	0.0011436	0.000967066	PEA15/APOE/MAPK3/RGS4/PPP2R1A/UBC/DUSP3/UBA52/SOD1/RPS3/CDK5RAP3/SPRED1/DUSP8/DUSP19/STK39/UBB/MAPK8IP3/MAPK8IP1/UCHL1/PPP2CA/DNAJA1/UBE2V1/PTPN11/IL1B/GADD45G/GRM4/LYN/IGFBP6/KIT/MAP4K2/PLCE1/MAP3K5/MAP3K12/HTR2A/DUSP6/DUSP1/PDGFA/HRAS/GPS1/CD74/PDGFRB/PDE6H/PTK2B/SORL1/MAP2K1	45
BP	GO:0006835	dicarboxylic acid transport	20/1445	93/18862	2.01159e-05	0.00117481	0.000993459	SLC1A3/RAB3A/TSPOAP1/GJA1/CCK/ARL6IP5/KCNJ10/SNAP25/ATP1A2/SLC38A2/SLC7A11/SLC25A18/SLC1A2/CPLX1/VAMP2/STX1A/SYT1/ARL6IP1/SLC26A4/ADORA1	20
BP	GO:0007611	learning or memory	37/1445	235/18862	2.16559e-05	0.00125184	0.0010586	PTN/PJA2/APOE/PRNP/NPTX2/NRGN/CCK/ARL6IP5/SNAP25/ATP1A2/SCN2A/NPTN/PTPRZ1/NDRG4/SLC7A11/FYN/PTCHD1/GRIN1/B2M/MEF2C/PRKCG/BRINP1/CALB1/KIT/PAK6/HTR2A/SGK1/NLGN4X/CIC/CEBPB/STRA6/ADCY3/PRKAR2B/LDLR/PLCB1/NRXN3/TLR2	37
BP	GO:1904951	positive regulation of establishment of protein localization	47/1445	328/18862	2.31745e-05	0.0013261	0.0011214	CAMK2N1/GLUD1/ZIC1/YWHAH/PRNP/HSP90AB1/GJA1/VSNL1/CNST/DYNLL1/PPP3R1/RACK1/KCNB1/CEMIP/C2CD5/MYH10/STOM/CCT7/PCNT/YWHAG/FYN/YWHAE/PARD6A/SMAD3/BAG3/IL1B/UBL5/VAMP2/FIS1/BAP1/RAC1/DMAP1/FLNA/PPP1R13B/ANK3/RAN/TM7SF3/EMD/NNAT/NADK/HRAS/SAR1A/APBB3/HPCA/TLR2/SORL1/OAZ1	47
BP	GO:0042063	gliogenesis	42/1445	283/18862	2.69042e-05	0.0014973	0.00126617	PLP1/MT3/CLU/PTN/MAPK3/GAP43/RELN/VIM/PHGDH/SOD1/KCNJ10/BNIP3/PTPRZ1/ADGRG1/ATP1B2/POU3F2/DAAM2/RTN4/EEF2/DNER/OLIG2/OPALIN/C1QA/CDH2/PTPN11/EIF2B4/IL1B/ZMIZ1/LYN/PPP1CC/S100A8/SOX10/NDN/LGI4/SOX8/LDLR/TLR2/TPPP/PTK2B/MAP2K1/ANXA1/ABCA2	42
BP	GO:0097193	intrinsic apoptotic signaling pathway	42/1445	283/18862	2.69042e-05	0.0014973	0.00126617	CLU/IFI6/RPL11/TPT1/TMBIM6/HINT1/MIF/CYP1B1/ARL6IP5/SOD1/RPS3/RACK1/SCN2A/BNIP3/PTTG1IP/RPS27L/UBB/RPL26/PIAS4/MAPK8IP1/BCL2L2/ENO1/RPS7/CYLD/DNAJA1/BAG6/HSPB1/MLLT11/FIS1/S100A8/MAP3K5/PPP1R13B/VDAC2/DDIT3/ERO1A/OPA1/BCLAF1/BRSK2/CEBPB/HRAS/CD74/DDX5	42
BP	GO:0048545	response to steroid hormone	47/1445	330/18862	2.71172e-05	0.0014973	0.00126617	FAM107A/SPARC/PTN/ATP1A3/CNOT2/SPP1/YWHAH/CALM1/HEY1/ZBTB7A/FOSB/AQP1/ATP1A2/FOXP1/PAM/ATP1A1/KLF9/LMO3/PDCD7/CBFB/DNAJA1/SAFB2/TADA3/DDX17/SCGB2A2/CALM3/ZMIZ1/FOXO1/SMYD3/SMARCA4/HEYL/RBBP7/ALPL/SOX10/PGRMC2/SGK1/CA2/DUSP1/NEFL/WBP2/KDM3A/TLR2/DDX5/CRY2/SSTR2/ANXA1/ABCA2	47
BP	GO:0045428	regulation of nitric oxide biosynthetic process	15/1445	59/18862	2.72237e-05	0.0014973	0.00126617	CLU/HBB/DDAH1/HSP90AB1/SIRPA/DYNLL1/SMAD3/IL1B/KLF4/RAC1/ROCK2/KLF2/KHSRP/NOS1AP/PTK2B	15
BP	GO:1901214	regulation of neuron death	44/1445	302/18862	2.77367e-05	0.00150805	0.00127526	MT3/CHGA/CLU/APOE/PRNP/HSP90AB1/ELK1/HDAC4/SET/SOD1/RACK1/KCNB1/SNCG/FAIM2/CHMP4B/PTPRZ1/UBB/SLC7A11/AP2B1/FYN/CRLF1/VPS35/MEF2C/C1QA/PRKCG/BACE1/GRM4/TRIM2/WFS1/MAP3K5/MAP3K12/PPP1R13B/CTSZ/CSF3/DDIT3/PPARGC1A/ADORA1/NEFL/CEBPB/HRAS/NAE1/NQO1/PTK2B/SORL1	44
BP	GO:0006809	nitric oxide biosynthetic process	17/1445	73/18862	2.80489e-05	0.00150805	0.00127526	CLU/HBB/DDAH1/HSP90AB1/SIRPA/CYP1B1/DYNLL1/SMAD3/IL1B/KLF4/RAC1/ROCK2/KLF2/KHSRP/NOS1AP/NQO1/PTK2B	17
BP	GO:0006099	tricarboxylic acid cycle	11/1445	34/18862	2.82177e-05	0.00150805	0.00127526	PDHB/ACO1/SDHD/SDHC/MDH1/SDHA/MDH2/OGDHL/DLD/OGDH/CS	11
BP	GO:0010975	regulation of neuron projection development	57/1445	428/18862	2.95986e-05	0.00156706	0.00132517	MT3/PTN/APOE/CHN1/SPP1/PDLIM5/YWHAH/ENC1/DIP2B/RELN/VIM/NCS1/GDI1/MARK2/ITM2C/MAP2/CAMK1D/SNAP25/COBL/FEZ1/NPTN/RGMA/SPOCK1/NR2F1/NDRG4/SHTN1/ATP1B2/POU3F2/SIPA1L1/RTN4/FYN/B2M/SS18L2/CDH2/KLF4/PPP2R5B/LYN/FKBP1B/SCARB2/CRMP1/FLNA/DDX56/ANKRD27/PLPPR5/FBXO38/OPA1/BRSK2/NEFL/ARHGAP33/DSCAM/RAB11A/TANC2/NCKIPSD/PTPRO/PTK2B/NLGN1/MAP2K1	57
BP	GO:0032412	regulation of ion transmembrane transporter activity	39/1445	257/18862	3.10126e-05	0.00162672	0.00137562	YWHAH/CALM1/PRNP/AHCYL1/RELN/ATP1A2/ATP1B1/GRIA2/CACNG3/STK39/ATP1B3/ATP1B2/STOM/FKBP1A/CAPN1/CNIH2/GRIN1/YWHAE/MEF2C/CALM3/VAMP2/FKBP1B/SPHK2/CALM2/CACNB4/FHL1/ANK3/SLC9A1/TESC/PPARGC1A/NEFL/NOS1AP/FXYD1/HOMER1/HPCA/PTK2B/NLGN1/FXYD7/STAC2	39
BP	GO:0006865	amino acid transport	27/1445	152/18862	3.2522e-05	0.00169025	0.00142934	SLC1A3/RAB3A/TSPOAP1/RGS4/GJA1/CCK/ARL6IP5/KCNJ10/SNAP25/SLC47A1/ATP1A2/SLC38A2/SLC38A1/SLC7A11/SLC25A18/SLC1A2/CPLX1/VAMP2/STX1A/SV2A/SYT1/SFXN5/ARL6IP1/SLC25A29/ADORA1/SLC6A12/SLC32A1	27
BP	GO:0030705	cytoskeleton-dependent intracellular transport	32/1445	195/18862	3.32292e-05	0.0017113	0.00144714	NEFH/TUBA1A/DYNC1H1/CALY/TUBA1C/MAP6D1/SOD1/MAP2/DYNLL1/FEZ1/CCDC88B/UBB/MAPK8IP3/CNIH2/AP3S1/TUBA1B/RHOT2/HSPB1/BAG3/DYNLRB1/KIF3B/DYNC1I1/NDE1/FYCO1/F8A1/PEX14/OPA1/NEFL/TANC2/ARHGAP21/KIFAP3/SYT4	32
BP	GO:0021700	developmental maturation	40/1445	268/18862	3.63289e-05	0.00185408	0.00156788	RAB3A/SNX10/RERE/RELN/RBPJ/CLSTN1/ZBTB7A/FGFR3/MTCH1/PTPRN/NRCAM/NFIA/DMC1/CBFB/SYP/S1PR1/C1QA/BCAN/LHX6/SNX19/KLF2/LTF/SOX10/DDIT3/SOX18/ANKRD27/DLD/OPA1/NEFL/LGI4/TMEM79/SOX8/LYL1/ACTL6B/ATP6AP2/CEND1/PTK2B/AKR1B1/SYT4/C3	40
BP	GO:0001764	neuron migration	26/1445	145/18862	3.82457e-05	0.00189431	0.00160189	CAMK2A/TUBB2B/GPM6A/TUBB2A/RELN/MARK2/CCK/SPOCK1/NRCAM/ADGRG1/SHTN1/DNER/FYN/DCLK1/MEF2C/ZMIZ1/RAC1/LHX6/FZD3/FLNA/AUTS2/PHACTR1/SATB2/NDN/ARX/NR2F2	26
BP	GO:0043484	regulation of RNA splicing	26/1445	145/18862	3.82457e-05	0.00189431	0.00160189	CELF5/RPS26/TMBIM6/ZBTB7A/SLC38A2/TRA2A/SRSF5/SNRNP70/YTHDC1/DDX17/SF1/RBM3/DYRK1A/PCBP4/KHDRBS1/HABP4/FXR1/HNRNPH3/POLR2A/CELF6/DDX5/TRA2B/SRSF4/RBM15/FUS/RBM12	26
BP	GO:0048284	organelle fusion	26/1445	145/18862	3.82457e-05	0.00189431	0.00160189	RAB3A/PRRT2/ENO2/SNAP25/C2CD5/BNIP3/ENO1/TMEM175/SYT13/VPS8/CPLX1/TAP1/VAMP2/STX1A/FIS1/TFRC/SYT1/MFN2/VPS41/ANKRD27/OPA1/STX3/STOML2/PIP4K2A/SYT4/ANXA1	26
BP	GO:0006470	protein dephosphorylation	46/1445	325/18862	3.84546e-05	0.00189431	0.00160189	PTN/CALM1/PPP2R1A/HSP90AB1/DUSP3/GNAI2/SET/PPP3R1/DUSP8/DUSP19/RCAN2/PTPRN/DUSP26/PTPRZ1/FKBP1A/NUAK1/PPP2R2C/DAPP1/PPP2CA/PPM1K/YWHAE/PTPN11/PPP2R5B/CALM3/PPP4R1/FKBP1B/PPP1CC/DUSP22/PPP1R3C/ROCK2/CALM2/PPP2R3B/PPP2R2B/PPP1R2/PPP2R5E/ADORA1/DUSP6/DUSP1/PHACTR1/RCAN1/PTPRN2/SSU72/PPM1B/PDGFRB/PTPRO/CRY2	46
BP	GO:0043488	regulation of mRNA stability	31/1445	188/18862	3.98443e-05	0.00194585	0.00164548	PSMA7/PSMC5/ALKBH5/VIM/UBC/SERBP1/UBA52/SET/UBB/YBX1/LARP1/EXOSC2/PUM1/PSMD11/PSMB3/HSPB1/TAF15/PSMC3/NPM1/ROCK2/PSMA1/PSMA6/KHSRP/PCBP4/HNRNPM/FXR1/PSMD4/PSMC4/PSMB5/ANP32A/FUS	31
BP	GO:0042254	ribosome biogenesis	44/1445	307/18862	4.14915e-05	0.00199806	0.00168963	RPL38/RPL24/RPL11/RPS14/RPL5/RPL35/RPS24/RPS25/RPS27/RPSA/RPL23A/RPS6/RPS10/RPS21/XRCC5/RPS27L/PA2G4/RPL27/GNL3L/RPS8/RPL26/EXOSC2/RPS7/RPL3/RPL10A/TRMT112/SART1/DDX17/DDX27/NPM1/NSA2/RPS28/SBDS/NAT10/RAN/SNU13/DDX56/TSR2/RPS9/GLUL/RPS19/UTP11/RPF2/NOC4L	44
BP	GO:0080164	regulation of nitric oxide metabolic process	15/1445	61/18862	4.1619e-05	0.00199806	0.00168963	CLU/HBB/DDAH1/HSP90AB1/SIRPA/DYNLL1/SMAD3/IL1B/KLF4/RAC1/ROCK2/KLF2/KHSRP/NOS1AP/PTK2B	15
BP	GO:0006469	negative regulation of protein kinase activity	37/1445	243/18862	4.55018e-05	0.00216611	0.00183174	CAMK2N1/APOE/RGS4/PPP2R1A/CIT/DUSP3/CDK5RAP3/SPRED1/DUSP8/RACK1/DUSP19/DUSP26/YWHAG/MAPK8IP1/UCHL1/PPP2CA/MLLT1/DNAJA1/HSPB1/IL1B/RASIP1/LYN/NPM1/DUSP22/SMYD3/ADAR/TESC/PRKRIP1/DUSP6/DUSP1/PRKAR2B/TESK1/GPS1/PTPRO/SORL1/PYDC1/NR2F2	37
BP	GO:0090314	positive regulation of protein targeting to membrane	10/1445	30/18862	4.8859e-05	0.00230655	0.0019505	PRNP/KCNB1/CEMIP/C2CD5/STOM/FYN/FIS1/ANK3/HRAS/HPCA	10
BP	GO:0090313	regulation of protein targeting to membrane	11/1445	36/18862	5.13788e-05	0.0024002	0.00202969	PRNP/GDI1/KCNB1/CEMIP/C2CD5/STOM/FYN/FIS1/ANK3/HRAS/HPCA	11
BP	GO:0051588	regulation of neurotransmitter transport	20/1445	99/18862	5.21138e-05	0.0024002	0.00202969	CAMK2A/RAB3A/CALM1/NCS1/PRKCB/ATP1A2/SNCG/CPLX1/SYP/MEF2C/CHRNA5/PRKCG/BACE1/CALM3/STX1A/SNCAIP/SYT1/HTR2A/NLGN1/SYT4	20
BP	GO:1903426	regulation of reactive oxygen species biosynthetic process	20/1445	99/18862	5.21138e-05	0.0024002	0.00202969	CLU/HBB/DDAH1/HSP90AB1/SIRPA/HDAC4/DYNLL1/SLC5A3/FYN/GRIN1/SMAD3/IL1B/KLF4/RAC1/ROCK2/SPHK2/KLF2/KHSRP/NOS1AP/PTK2B	20
BP	GO:1903409	reactive oxygen species biosynthetic process	23/1445	123/18862	5.35224e-05	0.0024452	0.00206775	CLU/HBB/DDAH1/HSP90AB1/SIRPA/HDAC4/CYP1B1/SOD1/DYNLL1/SLC5A3/FYN/GRIN1/SMAD3/IL1B/KLF4/RAC1/ROCK2/SPHK2/KLF2/KHSRP/NOS1AP/NQO1/PTK2B	23
BP	GO:0051938	L-glutamate import	7/1445	15/18862	5.6714e-05	0.00254988	0.00215627	SLC1A3/ARL6IP5/KCNJ10/ATP1A2/SLC7A11/SLC1A2/ARL6IP1	7
BP	GO:0098712	L-glutamate import across plasma membrane	7/1445	15/18862	5.6714e-05	0.00254988	0.00215627	SLC1A3/ARL6IP5/KCNJ10/ATP1A2/SLC7A11/SLC1A2/ARL6IP1	7
BP	GO:0071383	cellular response to steroid hormone stimulus	32/1445	201/18862	6.09328e-05	0.00270076	0.00228386	FAM107A/ATP1A3/CNOT2/YWHAH/HEY1/ZBTB7A/AQP1/ATP1A2/FOXP1/ATP1A1/KLF9/LMO3/CBFB/DNAJA1/SAFB2/TADA3/DDX17/SCGB2A2/ZMIZ1/FOXO1/SMYD3/SMARCA4/HEYL/SOX10/PGRMC2/SGK1/WBP2/KDM3A/DDX5/CRY2/SSTR2/ANXA1	32
BP	GO:0042552	myelination	23/1445	124/18862	6.10233e-05	0.00270076	0.00228386	PLP1/CLU/PTN/SOD1/KCNJ10/BCAS1/TYMP/SCN2A/PTPRZ1/POU3F2/MAL/PLLP/OLIG2/EIF2B4/EPB41L3/SOX10/GNPAT/GALC/LGI4/TLR2/TPPP/ABCA2/MAL2	23
BP	GO:0034620	cellular response to unfolded protein	26/1445	149/18862	6.17105e-05	0.00271	0.00229167	HSPA1B/TMBIM6/TPP1/ACADVL/CDK5RAP3/RACK1/HSPA6/KLHDC3/OPTN/HSPA9/HSPB8/CANX/SEC31A/BAG3/PPP2R5B/WFS1/ADD1/ERMP1/TM7SF3/DDIT3/ERO1A/FICD/EXTL3/RNF175/DDX11/HDGF	26
BP	GO:0015669	gas transport	8/1445	20/18862	6.35313e-05	0.0027685	0.00234114	HBB/HBD/AQP1/HBA1/HBA2/HBQ1/CA2/HBG1	8
BP	GO:0043687	post-translational protein modification	49/1445	361/18862	6.48293e-05	0.0028035	0.00237074	RAB3A/APOE/FBXL22/SPP1/WSB2/PSMA7/PSMC5/SPARCL1/CST3/FBXO2/CHGB/SKP1/VWA1/NEDD8/PSMD11/DCAF8/ANKRD9/PSMB3/TIMP1/FN3K/IGFBP4/CDH2/VHL/PSMC3/KLHL42/FBXL16/MFGE8/SCG2/WFS1/RABGGTA/PSMA1/IGFBP5/PSMA6/RBBP7/KLHL3/NUB1/WSB1/ASB8/FEM1C/CALU/RAB11A/PSMD4/GPS1/NAE1/PSMC4/FBXO27/PSMB5/C3/ABCA2	49
BP	GO:0072659	protein localization to plasma membrane	40/1445	275/18862	6.5394e-05	0.00280649	0.00237327	RAB3A/ACTB/BLZF1/RAMP1/CNST/ARL6IP5/ATP1B1/RAB10/RACK1/KCNB1/C2CD5/CLIP3/OPTN/ATP1B3/RAB15/RAB40C/TMEM59/ZDHHC8/ZDHHC23/TMBIM1/GRIPAP1/VPS35/CDH2/NSF/DENND4C/VAMP2/ROCK2/EPB41L3/FLNA/SQSTM1/RHOG/ANK3/TESC/CLTC/RAB26/RAB11A/ZDHHC22/STX3/VAMP5/STAC2	40
BP	GO:0016311	dephosphorylation	62/1445	491/18862	6.71561e-05	0.00286045	0.0024189	PTN/CALM1/PPP2R1A/LMTK3/HSP90AB1/DUSP3/CNST/GNAI2/SET/CDK5RAP3/LPIN1/SPRED1/PPP3R1/RIMBP2/ATP1A2/DUSP8/ALPP/ATP1A1/DUSP19/RCAN2/NT5C2/PTPRN/DUSP26/PTPRZ1/FKBP1A/NUAK1/PPP2R2C/DAPP1/HDDC2/PPP2CA/PPM1K/YWHAE/MEF2C/PTPN11/SMAD3/PPP2R5B/CALM3/PPP4R1/FKBP1B/PPP1CC/DUSP22/PPP1R3C/ROCK2/CALM2/PPP2R3B/PPP2R2B/ALPL/PPP1R2/PPP2R5E/ADORA1/DUSP6/DUSP1/PNKP/PHACTR1/PLPPR5/RCAN1/PTPRN2/SSU72/PPM1B/PDGFRB/PTPRO…	62
BP	GO:0035967	cellular response to topologically incorrect protein	28/1445	168/18862	7.61188e-05	0.00320966	0.0027142	HSPA1B/TMBIM6/TPP1/ACADVL/CDK5RAP3/RACK1/HSPA6/KLHDC3/OPTN/HSPA9/SDF2L1/HSPB8/BAG6/CANX/SEC31A/BAG3/PPP2R5B/WFS1/ADD1/ERMP1/TM7SF3/DDIT3/ERO1A/FICD/EXTL3/RNF175/DDX11/HDGF	28
BP	GO:0042176	regulation of protein catabolic process	51/1445	383/18862	7.64878e-05	0.00320966	0.0027142	GFAP/CLU/APOE/HSPA1B/EEF1A1/RPL11/RPL5/HSP90AB1/GJA1/CST3/TMEM9/CDK5RAP3/EEF1A2/VGLL4/RACK1/PTTG1IP/ZYG11B/RYBP/UBB/SNRNP70/FYN/RPS7/TIMP1/BAG6/VPS35/CTSA/APC2/SMAD3/N4BP1/PITHD1/IL1B/PRKCG/NSF/PSMC3/UBQLN2/FOXO1/NELL1/FLNA/TIMP2/F8A1/RNF40/NUB1/RAB26/RPL23/LDLR/FURIN/PSMC4/PTK2B/SORL1/ABCA2/OAZ1	51
BP	GO:0051348	negative regulation of transferase activity	42/1445	296/18862	7.74276e-05	0.00321562	0.00271924	CAMK2N1/APOE/RPL11/RPL5/RGS4/PPP2R1A/CIT/DUSP3/CDK5RAP3/SPRED1/DUSP8/RACK1/DUSP19/DUSP26/YWHAG/MAPK8IP1/UCHL1/RPS7/PPP2CA/MLLT1/DNAJA1/HSPB1/IL1B/RASIP1/LYN/NPM1/DUSP22/SMYD3/ADAR/TESC/PRKRIP1/DUSP6/DUSP1/RPL23/PRKAR2B/TESK1/GPS1/PTPRO/PIP4K2A/SORL1/PYDC1/NR2F2	42
BP	GO:0002478	antigen processing and presentation of exogenous peptide antigen	29/1445	177/18862	7.84275e-05	0.00321562	0.00271924	PSMA7/PSMC5/DYNC1H1/DYNLL1/SH3GL2/HLA-DPB1/DYNC1LI2/AP2B1/PSMD11/AP2S1/PSMB3/B2M/CANX/SEC31A/TAP1/PSMC3/KIF3B/DYNC1I1/PSMA1/PSMA6/ITGB5/CLTC/PSMD4/CTSL/KIFAP3/CD74/PSMC4/KLC2/PSMB5	29
BP	GO:0007272	ensheathment of neurons	23/1445	126/18862	7.89004e-05	0.00321562	0.00271924	PLP1/CLU/PTN/SOD1/KCNJ10/BCAS1/TYMP/SCN2A/PTPRZ1/POU3F2/MAL/PLLP/OLIG2/EIF2B4/EPB41L3/SOX10/GNPAT/GALC/LGI4/TLR2/TPPP/ABCA2/MAL2	23
BP	GO:0008366	axon ensheathment	23/1445	126/18862	7.89004e-05	0.00321562	0.00271924	PLP1/CLU/PTN/SOD1/KCNJ10/BCAS1/TYMP/SCN2A/PTPRZ1/POU3F2/MAL/PLLP/OLIG2/EIF2B4/EPB41L3/SOX10/GNPAT/GALC/LGI4/TLR2/TPPP/ABCA2/MAL2	23
BP	GO:0051090	regulation of DNA-binding transcription factor activity	57/1445	444/18862	8.30317e-05	0.00335883	0.00284034	MTURN/CAMK2A/CLU/HSPA1B/ZIC2/MAPK3/PRNP/RELN/PRKCB/UBC/UBA52/HDAC4/CYP1B1/ZBTB7A/CAMK1D/RPS3/CDK5RAP3/NWD1/BEX1/UBB/IL18/PIAS4/NDP/CYLD/NFKBIA/UBE2V1/SMAD3/LRRFIP1/IL1B/KLF4/PPP2R5B/TFRC/KIT/NPM1/WFS1/S100A8/STK36/FLNA/PSMA6/SMARCA4/HEYL/LTF/CSF3/TRIM37/DDIT3/PEX14/SGK1/PPARGC1A/RGCC/NDN/COMMD7/PIM1/TLR2/ID2/HES6/PYDC1/SP100	57
BP	GO:0000188	inactivation of MAPK activity	9/1445	26/18862	8.36001e-05	0.00335883	0.00284034	RGS4/PPP2R1A/DUSP3/SPRED1/DUSP8/PPP2CA/DUSP6/DUSP1/GPS1	9
BP	GO:0043434	response to peptide hormone	56/1445	435/18862	8.85898e-05	0.00353423	0.00298867	CAMK2A/SPARC/ATP6V0C/SYAP1/ATP6V1B2/NUCKS1/STXBP4/AHCYL1/ATP6V1E1/ATP6V0A1/GJA1/JUND/PRKCB/GNAI2/ATP6V1D/LPIN1/RAB10/STAT2/C2CD5/PTPRN/PDK4/RAB15/SRSF5/ATP6V0B/YWHAG/SCAP/AP3S1/FYN/TIMP1/QDPR/SLC2A8/PTPN11/EIF2B4/IL1B/DENND4C/LYN/FOXO1/VAMP2/EPM2AIP1/ROCK2/FABP3/IGFBP5/ATP6V1H/SLC9A1/RNF40/CA2/PHIP/OPA1/NEFL/ADCY3/PRKAR2B/TLR2/PIP4K2A/SORL1/SRSF4/ANXA1	56
BP	GO:0070498	interleukin-1-mediated signaling pathway	20/1445	103/18862	9.34119e-05	0.00365345	0.00308949	MAPK3/PSMA7/PSMC5/UBC/UBA52/SKP1/UBB/PSMD11/PSMB3/NFKBIA/UBE2V1/IL1B/PSMC3/PSMA1/SQSTM1/PSMA6/PSMD4/PLCB1/PSMC4/PSMB5	20
BP	GO:0000375	RNA splicing, via transesterification reactions	51/1445	386/18862	9.34454e-05	0.00365345	0.00308949	CELF5/SRRM1/ZBTB7A/TRA2A/U2AF1/YBX1/SRSF5/POLR2I/POLR2F/PDCD7/SNRNP70/RBM14/SNRPD3/PCBP1/YTHDC1/SART1/UBL5/DDX17/SRSF11/SF1/RBM3/CWF19L2/DDX1/WDR33/POLR2L/SNU13/KHSRP/U2SURP/FIP1L1/CLNS1A/DYRK1A/GTF2F1/POLR2J/SNRNP25/PCBP4/HNRNPM/PHF5A/GPKOW/KHDRBS1/FXR1/RNF113A/HNRNPH3/PRPF6/POLR2A/CELF6/GCFC2/DDX5/TRA2B/SRSF4/RBM15/FUS	51
BP	GO:0061684	chaperone-mediated autophagy	7/1445	16/18862	9.41578e-05	0.00365345	0.00308949	GFAP/CLU/EEF1A1/EEF1A2/SNRNP70/CTSA/BAG3	7
BP	GO:0098877	neurotransmitter receptor transport to plasma membrane	7/1445	16/18862	9.41578e-05	0.00365345	0.00308949	CLSTN1/SNAP25/CPLX1/GRIPAP1/VPS35/RAB11A/STX3	7
BP	GO:0010506	regulation of autophagy	45/1445	328/18862	9.84312e-05	0.00376802	0.00318637	GFAP/MT3/GOLGA2/ATP6V0C/EEF1A1/ATP6V1B2/MAPK3/ATP6V1E1/ATP6V0A1/SMG1/ATP6V1D/EEF1A2/RRAGC/FEZ1/BNIP3/CHMP4B/FEZ2/OPTN/LARP1/ATP6V0B/TMEM59/GAPDH/CAPN1/GPR137B/UCHL1/SNRNP70/DCN/RRAGD/HSPB8/VPS26A/VPS35/HSPB1/CTSA/BAG3/RASIP1/UBQLN2/FOXO1/CAMKK2/FYCO1/ATP6V1H/ATG101/SCOC/DDIT3/CPTP/PIP4K2A	45
BP	GO:0071456	cellular response to hypoxia	32/1445	206/18862	9.84408e-05	0.00376802	0.00318637	MT3/PTN/PSMA7/PSMC5/DDAH1/TMBIM6/RBPJ/UBC/UBA52/AQP1/CHCHD2/SCN2A/BNIP3/UBB/ENO1/PSMD11/PSMB3/VHL/PSMC3/ROCK2/KCND2/PSMA1/PSMA6/SLC9A1/PPARGC1A/RGCC/ERO1A/OPA1/HIGD1A/PSMD4/PSMC4/PSMB5	32
BP	GO:0071901	negative regulation of protein serine/threonine kinase activity	25/1445	145/18862	0.000103528	0.00393613	0.00332853	APOE/RGS4/PPP2R1A/CIT/DUSP3/CDK5RAP3/SPRED1/DUSP8/DUSP19/YWHAG/MAPK8IP1/UCHL1/PPP2CA/DNAJA1/HSPB1/IL1B/RASIP1/LYN/DUSP6/DUSP1/PRKAR2B/TESK1/GPS1/SORL1/NR2F2	25
BP	GO:0072593	reactive oxygen species metabolic process	40/1445	281/18862	0.00010568	0.00399119	0.00337509	MT3/CLU/IFI6/HBB/DDAH1/HSP90AB1/SIRPA/HDAC4/HBD/GNAI2/CYP1B1/SOD1/DYNLL1/HP/BNIP3/PDK4/HBA1/HBA2/SLC5A3/FYN/HBQ1/GRIN1/SMAD3/IL1B/KLF4/RAC1/ROCK2/SPHK2/GPX3/KLF2/KHSRP/NOS1AP/PDGFRB/HBG1/PRCP/NQO1/SOD3/TLR2/PTK2B/RFK	40
BP	GO:0051051	negative regulation of transport	56/1445	438/18862	0.000106603	0.00399938	0.00338202	CHGA/PEA15/APOE/PRRT2/CALM1/RGS4/TMBIM6/GJA1/PFKL/PRKCB/VSNL1/SIRPA/APOD/GDI1/GNAI2/ARL6IP5/ATP1A2/RACK1/KCNB1/FABP5/STK39/CABP1/CNIH2/ARHGAP1/GNAO1/VPS35/YWHAE/NECAB2/ATXN2/PTPN11/BAG3/IL1B/CALM3/UBQLN2/ISCU/FKBP1B/FIS1/RSAD2/RAC1/CALM2/ANK3/HTR2A/ANKRD27/ADORA1/UBE2J1/CD74/TLR2/PTK2B/SYT4/IL13RA2/ANXA1/ABCA2/OAZ1/ANKRD13A/ERLEC1/SP100	56
BP	GO:0043487	regulation of RNA stability	31/1445	198/18862	0.000108298	0.00403625	0.0034132	PSMA7/PSMC5/ALKBH5/VIM/UBC/SERBP1/UBA52/SET/UBB/YBX1/LARP1/EXOSC2/PUM1/PSMD11/PSMB3/HSPB1/TAF15/PSMC3/NPM1/ROCK2/PSMA1/PSMA6/KHSRP/PCBP4/HNRNPM/FXR1/PSMD4/PSMC4/PSMB5/ANP32A/FUS	31
BP	GO:0072384	organelle transport along microtubule	17/1445	81/18862	0.000113577	0.00420532	0.00355617	NEFH/DYNC1H1/MAP2/FEZ1/UBB/CNIH2/AP3S1/RHOT2/KIF3B/DYNC1I1/NDE1/FYCO1/PEX14/OPA1/NEFL/ARHGAP21/KIFAP3	17
BP	GO:0071902	positive regulation of protein serine/threonine kinase activity	43/1445	311/18862	0.000116615	0.00427308	0.00361347	PEA15/SYAP1/MAPK3/CALM1/HSP90AB1/UBC/UBA52/SOD1/RPS3/DUSP19/CEMIP/STK39/UBB/MAPK8IP3/FERMT2/ALS2/PPP2CA/UBE2V1/PTPN11/IL1B/GADD45G/CALM3/GRM4/IGFBP6/KIT/CALM2/MAP4K2/PLCE1/MAP3K5/MAP3K12/HTR2A/LTF/RGCC/DUSP6/PSRC1/PDGFA/HRAS/CD74/PDGFRB/PDE6H/PTK2B/CCND2/MAP2K1	43
BP	GO:0010882	regulation of cardiac muscle contraction by calcium ion signaling	9/1445	27/18862	0.000116916	0.00427308	0.00361347	CALM1/HDAC4/ATP1A2/ATP1B1/CALM3/FKBP1B/CALM2/CACNA1C/SLC9A1	9
BP	GO:0098754	detoxification	24/1445	138/18862	0.000122889	0.00446259	0.00377373	MT1F/MT3/APOE/HBB/MT1G/MT2A/MT1H/HBD/SOD1/HP/MT1X/RDH11/HBA1/HBA2/MGST3/HBQ1/GPX4/GSTK1/MGST1/GPX3/HBG1/NQO1/SOD3/PIM1	24
BP	GO:1901653	cellular response to peptide	51/1445	391/18862	0.000129459	0.00467126	0.00395018	CAMK2A/ATP1A3/ATP6V0C/SYAP1/ATP6V1B2/NUCKS1/STXBP4/PRNP/AHCYL1/ATP6V1E1/ATP6V0A1/GJA1/VIM/PRKCB/GNAI2/ATP6V1D/LPIN1/RAB10/C2CD5/PDK4/RAB15/SRSF5/ATP6V0B/YWHAG/AP3S1/CHMP5/FYN/SLC2A8/PTPN11/IL1B/KLF4/DENND4C/BACE1/LYN/FOXO1/VAMP2/ROCK2/LDOC1/ATP6V1H/SLC9A1/KLF2/CA2/PHIP/OPA1/RPL23/ADCY3/PRKAR2B/PIP4K2A/SORL1/AKR1B1/DDX11	51
BP	GO:0099072	regulation of postsynaptic membrane neurotransmitter receptor levels	14/1445	60/18862	0.00013712	0.00491636	0.00415745	CALY/CLSTN1/SNAP25/CACNG3/AP2B1/CPLX1/GRIPAP1/YWHAE/GPHN/RAB11A/HRAS/STX3/HPCA/CPT1C	14
BP	GO:0022613	ribonucleoprotein complex biogenesis	59/1445	473/18862	0.000139796	0.0049744	0.00420653	RPL38/RPL24/RPL11/RPS14/CELF5/RPL5/RPL35/RPS24/HSP90AB1/RPS25/RPS27/RPSA/RPL23A/RPS6/RPS10/EIF3C/RPS21/XRCC5/RPS27L/PA2G4/RPL27/GNL3L/SRSF5/RPS8/RPL26/EXOSC2/RPS7/RPL3/SNRPD3/RPL10A/YTHDC1/TRMT112/SART1/RPL13A/DDX17/DDX27/SF1/EIF2S3/NPM1/NSA2/RPS28/ADAR/SBDS/DDX1/NAT10/RAN/SNU13/DDX56/CLNS1A/TSR2/RPS9/GLUL/PRPF6/RPS19/UTP11/CELF6/RPF2/GCFC2/NOC4L	59
BP	GO:0010001	glial cell differentiation	32/1445	210/18862	0.000142215	0.0049744	0.00420653	PLP1/MT3/CLU/PTN/MAPK3/GAP43/RELN/VIM/PHGDH/SOD1/KCNJ10/BNIP3/PTPRZ1/POU3F2/DAAM2/DNER/OLIG2/OPALIN/C1QA/CDH2/PTPN11/EIF2B4/LYN/S100A8/SOX10/LGI4/SOX8/LDLR/TLR2/TPPP/MAP2K1/ABCA2	32
BP	GO:0061013	regulation of mRNA catabolic process	32/1445	210/18862	0.000142215	0.0049744	0.00420653	PSMA7/PSMC5/ALKBH5/VIM/UBC/SERBP1/UBA52/SET/UBB/YBX1/LARP1/EXOSC2/PUM1/PSMD11/PSMB3/HSPB1/TAF15/PSMC3/NPM1/ROCK2/PSMA1/PSMA6/KHSRP/PCBP4/HNRNPM/FXR1/PSMD4/PSMC4/PSMB5/ANP32A/TNRC6B/FUS	32
BP	GO:0010959	regulation of metal ion transport	36/1445	247/18862	0.000142251	0.0049744	0.00420653	PLP1/CAMK2A/CALM1/RGS4/PRNP/TMBIM6/GJA1/GNAI2/ATP1A2/ATP1B1/SARAF/CEMIP/APLNR/ATP1B3/ATP1B2/FKBP1A/FYN/GRIN1/GNAO1/YWHAE/CALM3/LYN/FKBP1B/SPHK2/WFS1/CALM2/CACNB4/CACNA1C/SLC9A1/NOS1AP/FXYD1/HOMER1/PDGFRB/HPCA/PTK2B/STAC2	36
BP	GO:0006119	oxidative phosphorylation	25/1445	148/18862	0.000145002	0.00503948	0.00426157	NDUFA4/UQCR10/NDUFC2/NDUFA5/CHCHD2/NDUFB4/NDUFV1/COX5A/COX4I1/COX7C/NDUFA10/NDUFB5/COX8A/NDUFS8/NDUFS7/NDUFB8/ISCU/SDHD/SDHC/SDHA/NDUFB10/DLD/NDUFS5/STOML2/NDUFB7	25
BP	GO:0000377	RNA splicing, via transesterification reactions with bulged adenosine as nucleophile	50/1445	383/18862	0.000146851	0.0050419	0.00426361	CELF5/SRRM1/ZBTB7A/TRA2A/U2AF1/YBX1/SRSF5/POLR2I/POLR2F/PDCD7/SNRNP70/RBM14/SNRPD3/PCBP1/YTHDC1/SART1/UBL5/DDX17/SRSF11/SF1/RBM3/CWF19L2/DDX1/WDR33/POLR2L/SNU13/U2SURP/FIP1L1/CLNS1A/DYRK1A/GTF2F1/POLR2J/SNRNP25/PCBP4/HNRNPM/PHF5A/GPKOW/KHDRBS1/FXR1/RNF113A/HNRNPH3/PRPF6/POLR2A/CELF6/GCFC2/DDX5/TRA2B/SRSF4/RBM15/FUS	50
BP	GO:0000398	mRNA splicing, via spliceosome	50/1445	383/18862	0.000146851	0.0050419	0.00426361	CELF5/SRRM1/ZBTB7A/TRA2A/U2AF1/YBX1/SRSF5/POLR2I/POLR2F/PDCD7/SNRNP70/RBM14/SNRPD3/PCBP1/YTHDC1/SART1/UBL5/DDX17/SRSF11/SF1/RBM3/CWF19L2/DDX1/WDR33/POLR2L/SNU13/U2SURP/FIP1L1/CLNS1A/DYRK1A/GTF2F1/POLR2J/SNRNP25/PCBP4/HNRNPM/PHF5A/GPKOW/KHDRBS1/FXR1/RNF113A/HNRNPH3/PRPF6/POLR2A/CELF6/GCFC2/DDX5/TRA2B/SRSF4/RBM15/FUS	50
BP	GO:0030521	androgen receptor signaling pathway	11/1445	40/18862	0.000148706	0.00507481	0.00429144	ZBTB7A/FOXP1/DNAJA1/SAFB2/DDX17/SCGB2A2/ZMIZ1/SMARCA4/HEYL/KDM3A/DDX5	11
BP	GO:0033673	negative regulation of kinase activity	38/1445	267/18862	0.000155987	0.00529143	0.00447462	CAMK2N1/APOE/RGS4/PPP2R1A/CIT/DUSP3/CDK5RAP3/SPRED1/DUSP8/RACK1/DUSP19/DUSP26/YWHAG/MAPK8IP1/UCHL1/PPP2CA/MLLT1/DNAJA1/HSPB1/IL1B/RASIP1/LYN/NPM1/DUSP22/SMYD3/ADAR/TESC/PRKRIP1/DUSP6/DUSP1/PRKAR2B/TESK1/GPS1/PTPRO/PIP4K2A/SORL1/PYDC1/NR2F2	38
BP	GO:0030004	cellular monovalent inorganic cation homeostasis	21/1445	115/18862	0.000157742	0.00531911	0.00449803	ATP1A3/ATP6V0C/ATP6V1B2/MAPK3/ATP6V1E1/ATP6V0A1/TMEM9/ATP6V1D/ATP1A2/ATP1B1/ATP1A1/ATP1B3/ATP1B2/ATP6V0B/TMEM175/CLIC4/ATP6V1H/SLC9A1/CA2/ATP6AP2/SLC9A6	21
BP	GO:0071280	cellular response to copper ion	9/1445	28/18862	0.000160649	0.00538508	0.00455382	MT1F/MT3/MT1G/MT2A/MT1H/PRNP/AQP1/MT1X/BACE1	9
BP	GO:0035637	multicellular organismal signaling	31/1445	203/18862	0.000172362	0.00573351	0.00484846	ATP1A3/CALM1/AHCYL1/GJA1/SOD1/ATP1A2/ATP1B1/SCN11A/TYMP/SCN2A/ATP1A1/CACNG3/ATP1B3/ATP1B2/SCN1A/S1PR1/YWHAE/CALM3/FKBP1B/KCND2/CALM2/FLNA/CACNB4/CACNA1C/ANK3/SLC9A1/KCNIP1/KCNA5/FXYD1/FXYD7/MYH14	31
BP	GO:0048002	antigen processing and presentation of peptide antigen	30/1445	194/18862	0.000173749	0.00573351	0.00484846	PSMA7/PSMC5/DYNC1H1/DYNLL1/SH3GL2/HLA-DPB1/DYNC1LI2/AP2B1/PSMD11/AP2S1/PSMB3/B2M/ERAP2/CANX/SEC31A/TAP1/PSMC3/KIF3B/DYNC1I1/PSMA1/PSMA6/ITGB5/CLTC/PSMD4/CTSL/KIFAP3/CD74/PSMC4/KLC2/PSMB5	30
BP	GO:0019884	antigen processing and presentation of exogenous antigen	29/1445	185/18862	0.00017408	0.00573351	0.00484846	PSMA7/PSMC5/DYNC1H1/DYNLL1/SH3GL2/HLA-DPB1/DYNC1LI2/AP2B1/PSMD11/AP2S1/PSMB3/B2M/CANX/SEC31A/TAP1/PSMC3/KIF3B/DYNC1I1/PSMA1/PSMA6/ITGB5/CLTC/PSMD4/CTSL/KIFAP3/CD74/PSMC4/KLC2/PSMB5	29
BP	GO:0001558	regulation of cell growth	52/1445	406/18862	0.000177146	0.00580076	0.00490533	FAM107A/MT3/APOE/HSPA1B/SPP1/RGS4/PPP2R1A/DIP2B/GJA1/GDI1/CLSTN1/MAP2/BTG1/VGLL4/RACK1/SPOCK1/NRCAM/SHTN1/KIAA1109/EXOSC2/RTN4/OLFM1/ENO1/PPP2CA/IGFBP4/SMAD3/RASAL1/CPNE6/BAP1/SYT1/EPB41L3/ADIPOR2/SPHK2/S100A8/FHL1/NET1/PLCE1/IGFBP5/SMARCA4/SLC9A1/RBBP7/SLC44A4/SGK1/PSRC1/DSCAM/RAB11A/CHPT1/CGRRF1/EXTL3/PTK2B/SYT4/FRZB	52
BP	GO:0051098	regulation of binding	47/1445	357/18862	0.000188052	0.00612251	0.00517742	ACTB/APOE/GOLGA2/RPL11/NUCKS1/MAPK3/CALM1/HEY1/SLPI/HSP90AB1/TMBIM6/RAMP1/MARK2/HDAC4/ZBTB7A/MAP2/EIF3C/RACK1/GNL3L/FKBP1A/PAX6/PPP2CA/B2M/NFKBIA/SMAD3/KLF4/CALM3/CRMP1/MED25/PBXIP1/ADD1/CTSZ/RAN/CSF3/DDIT3/PEX14/GTF2F1/PLCL2/MAPRE1/SUMO3/HABP4/IFIT2/GMNN/PCBD1/SORL1/DDX11/SP100	47
BP	GO:0006813	potassium ion transport	34/1445	232/18862	0.000193218	0.00625474	0.00528923	SLC1A3/ATP1A3/RGS4/KCNJ10/SNAP25/AQP1/ATP1A2/ATP1B1/KCNB1/ATP1A1/STK39/ATP1B3/KCNK12/ATP1B2/SLC24A3/TMEM175/YWHAE/NSF/VAMP2/KCND2/FLNA/FHL1/ANK3/SLC9A1/SLC12A7/HTR2A/KCNIP1/KCNA5/ADORA1/NOS1AP/FXYD1/PTK2B/SLC9A6/KCNH3	34
BP	GO:0006521	regulation of cellular amino acid metabolic process	14/1445	62/18862	0.000198967	0.00630956	0.00533559	PSMA7/PSMC5/ATCAY/SLC7A11/PSMD11/PSMB3/PSMC3/PSMA1/PSMA6/PSMD4/PSMC4/NQO1/PSMB5/OAZ1	14
BP	GO:0001666	response to hypoxia	46/1445	348/18862	0.000199553	0.00630956	0.00533559	MT3/PTN/PSMA7/PSMC5/ALKBH5/DDAH1/TMBIM6/RBPJ/UBC/UBA52/AQP1/CHCHD2/ATP1B1/PAM/SCN2A/BNIP3/UBB/SCAP/ENO1/PSMD11/ARNT2/PSMB3/SLC2A8/SMAD3/VHL/PSMC3/ROCK2/KCND2/PSMA1/PSMA6/SLC9A1/KCNA5/PPARGC1A/ADORA1/RGCC/ERO1A/ALAS1/OPA1/LDHA/HIGD1A/PSMD4/PSMC4/SOD3/TLR2/PTK2B/PSMB5	46
BP	GO:0042026	protein refolding	8/1445	23/18862	0.00020088	0.00630956	0.00533559	HSPA1B/DNAJA2/HSPA6/HSPA9/FKBP1A/SNRNP70/B2M/FKBP1B	8
BP	GO:0070841	inclusion body assembly	8/1445	23/18862	0.00020088	0.00630956	0.00533559	CLU/HSPA1B/PSMC5/BAG3/SNCAIP/TRIM37/DNAJB1/SORL1	8
BP	GO:0048678	response to axon injury	16/1445	77/18862	0.000202099	0.00630956	0.00533559	PTN/SPP1/GAP43/APOD/SOD1/BNIP3/RGMA/MAPK8IP3/KLF4/LYN/FKBP1B/MORN4/FLNA/FLRT3/NEFL/MAP2K1	16
BP	GO:0061418	regulation of transcription from RNA polymerase II promoter in response to hypoxia	16/1445	77/18862	0.000202099	0.00630956	0.00533559	PSMA7/PSMC5/RBPJ/UBC/UBA52/UBB/PSMD11/PSMB3/VHL/PSMC3/PSMA1/PSMA6/HIGD1A/PSMD4/PSMC4/PSMB5	16
BP	GO:0036294	cellular response to decreased oxygen levels	32/1445	214/18862	0.000202708	0.00630956	0.00533559	MT3/PTN/PSMA7/PSMC5/DDAH1/TMBIM6/RBPJ/UBC/UBA52/AQP1/CHCHD2/SCN2A/BNIP3/UBB/ENO1/PSMD11/PSMB3/VHL/PSMC3/ROCK2/KCND2/PSMA1/PSMA6/SLC9A1/PPARGC1A/RGCC/ERO1A/OPA1/HIGD1A/PSMD4/PSMC4/PSMB5	32
BP	GO:1903428	positive regulation of reactive oxygen species biosynthetic process	13/1445	55/18862	0.000205283	0.00633565	0.00535765	CLU/HBB/DDAH1/HSP90AB1/HDAC4/SLC5A3/GRIN1/SMAD3/IL1B/KLF4/KLF2/NOS1AP/PTK2B	13
BP	GO:2001242	regulation of intrinsic apoptotic signaling pathway	26/1445	160/18862	0.000205783	0.00633565	0.00535765	CLU/RPL11/TPT1/TMBIM6/MIF/SOD1/RPS3/RACK1/PTTG1IP/UBB/RPL26/PIAS4/MAPK8IP1/BCL2L2/ENO1/RPS7/CYLD/DNAJA1/HSPB1/FIS1/S100A8/VDAC2/DDIT3/OPA1/BCLAF1/CD74	26
BP	GO:0043393	regulation of protein binding	30/1445	196/18862	0.0002089	0.00639687	0.00540942	ACTB/APOE/GOLGA2/RPL11/MAPK3/SLPI/HSP90AB1/TMBIM6/RAMP1/MARK2/HDAC4/MAP2/RACK1/GNL3L/FKBP1A/PPP2CA/B2M/CRMP1/ADD1/CTSZ/RAN/CSF3/PEX14/GTF2F1/PLCL2/MAPRE1/IFIT2/PCBD1/SORL1/DDX11	30
BP	GO:0010248	establishment or maintenance of transmembrane electrochemical gradient	6/1445	13/18862	0.000214432	0.00649602	0.00549327	ATP1A3/ATP1A2/ATP1B1/ATP1A1/ATP1B3/ATP1B2	6
BP	GO:0030007	cellular potassium ion homeostasis	6/1445	13/18862	0.000214432	0.00649602	0.00549327	ATP1A3/ATP1A2/ATP1B1/ATP1A1/ATP1B3/ATP1B2	6
BP	GO:0055075	potassium ion homeostasis	9/1445	29/18862	0.000217208	0.00654513	0.0055348	ATP1A3/KCNJ10/ATP1A2/ATP1B1/ATP1A1/ATP1B3/ATP1B2/SLC12A7/KCNA5	9
BP	GO:0001508	action potential	23/1445	135/18862	0.000230817	0.00691839	0.00585044	GNA11/YWHAH/CALM1/GJA1/ATP1A2/ATP1B1/SCN11A/KCNB1/SCN2A/ATP1A1/SNTA1/SCN1A/YWHAE/CALM3/FKBP1B/KCND2/FLNA/CACNA1C/ANK3/SLC9A1/KCNA5/NOS1AP/MYH14	23
BP	GO:0008277	regulation of G protein-coupled receptor signaling pathway	24/1445	144/18862	0.000240534	0.00717171	0.00606465	CAMK2A/CHGA/CALM1/RGS4/RAMP1/MGLL/RGS11/GNAI2/APLNR/SYP/NECAB2/UBQLN2/USP20/ROCK2/FRMPD1/PLCE1/ABHD6/RGS6/RGS1/GNG7/PLCB1/PDE6H/C3/MGRN1	24
BP	GO:1903305	regulation of regulated secretory pathway	23/1445	136/18862	0.000258034	0.00765321	0.00647183	RAB3A/CALM1/NCS1/PRKCB/GNAI2/KCNB1/RAB15/IL4R/SYT13/SYP/CHRNA5/PRKCG/BACE1/CALM3/LYN/STX1A/SYT1/SPHK2/HTR2A/NLGN1/SYT4/IL13RA2/DOC2A	23
BP	GO:0033572	transferrin transport	10/1445	36/18862	0.000270575	0.007942	0.00671604	ATP6V0C/ATP6V1B2/ATP6V1E1/ATP6V0A1/ATP6V1D/ATP6V0B/ARHGAP1/TFRC/ATP6V1H/CLTC	10
BP	GO:2000310	regulation of NMDA receptor activity	10/1445	36/18862	0.000270575	0.007942	0.00671604	RELN/GRIA2/CAPN1/CNIH2/GRIN1/MEF2C/PPARGC1A/NEFL/PTK2B/NLGN1	10
BP	GO:0006826	iron ion transport	16/1445	79/18862	0.000275712	0.00805106	0.00680827	ATP6V0C/FTH1/ATP6V1B2/ATP6V1E1/ATP6V0A1/ATP6V1D/ATP6V0B/ARHGAP1/B2M/SLC48A1/ISCU/TFRC/ATP6V1H/LTF/PGRMC2/CLTC	16
BP	GO:0031338	regulation of vesicle fusion	8/1445	24/18862	0.000281193	0.00816314	0.00690304	RAB3A/PRRT2/C2CD5/CPLX1/SYT1/ANKRD27/SYT4/ANXA1	8
BP	GO:0002028	regulation of sodium ion transport	17/1445	87/18862	0.000282432	0.00816314	0.00690304	YWHAH/AHCYL1/ATP1A2/ATP1B1/ATP1A1/STK39/ATP1B3/ATP1B2/STOM/SNTA1/NKAIN2/ANK3/SLC9A1/TESC/FXYD1/NKAIN4/FXYD7	17
BP	GO:0031346	positive regulation of cell projection organization	45/1445	344/18862	0.000294211	0.00846044	0.00715445	PTN/GPM6A/APOE/ENC1/RELN/CDC42EP4/GDI1/MARK2/HDAC4/DYNLL1/CAMK1D/COBL/FEZ1/NPTN/NDRG4/SHTN1/ATP1B2/FYN/FAM98A/SS18L2/PPP2R5B/LYN/FKBP1B/RAC1/SCARB2/KIT/FLNA/PLCE1/AUTS2/AKIRIN1/PLEKHM1/DDX56/ANKRD27/PLPPR5/FBXO38/OPA1/NEFL/DSCAM/RAB11A/HRAS/RALA/NCKIPSD/PTK2B/NLGN1/MAP2K1	45
BP	GO:0006734	NADH metabolic process	11/1445	43/18862	0.000298994	0.00849789	0.00718612	ALDOC/PFKP/ENO2/PFKL/GAPDH/ENO1/TPI1/PGM2L1/MDH1/MDH2/NQO1	11
BP	GO:0097178	ruffle assembly	11/1445	43/18862	0.000298994	0.00849789	0.00718612	SNX10/COBL/EVL/FAM98A/RAC1/RHOG/PLEKHM1/HRAS/NLGN1/PFN2/AIF1	11
BP	GO:0086065	cell communication involved in cardiac conduction	13/1445	57/18862	0.000300014	0.00849789	0.00718612	ATP1A3/CALM1/GJA1/ATP1A2/ATP1B1/ATP1A1/ATP1B2/CALM3/FKBP1B/CALM2/FLNA/CACNA1C/KCNA5	13
BP	GO:0036465	synaptic vesicle recycling	15/1445	72/18862	0.00030701	0.0086528	0.00731712	RAB3A/CALM1/SH3GL2/SNCG/KIAA1109/GRIPAP1/SYP/CANX/CALM3/VAMP2/STX1A/SYT1/NLGN4X/PIP5K1C/NLGN1	15
BP	GO:0043648	dicarboxylic acid metabolic process	18/1445	96/18862	0.000323544	0.00907365	0.007673	GLUD1/GPT2/ATCAY/GAD2/SLC7A11/ALDH4A1/MDH1/SDHA/ALDH5A1/GLUD2/MDH2/MRPS36/HOGA1/DLD/OGDH/GLUL/PHYH/GAD1	18
BP	GO:1901606	alpha-amino acid catabolic process	17/1445	88/18862	0.000325472	0.00908275	0.0076807	GLUD1/DDAH1/CSAD/GPT2/GCSH/IDO2/GAD2/QDPR/ALDH4A1/GLUD2/HOGA1/DLD/OGDH/GLUL/PCBD1/HSD17B10/GAD1	17
BP	GO:0042177	negative regulation of protein catabolic process	21/1445	121/18862	0.000327114	0.00908383	0.00768162	RPL11/RPL5/HSP90AB1/CST3/CDK5RAP3/RYBP/SNRNP70/FYN/RPS7/TIMP1/BAG6/CTSA/SMAD3/N4BP1/PRKCG/NELL1/FLNA/TIMP2/F8A1/RPL23/FURIN	21
BP	GO:0006883	cellular sodium ion homeostasis	7/1445	19/18862	0.000337948	0.00930005	0.00786445	ATP1A3/ATP1A2/ATP1B1/ATP1A1/ATP1B3/ATP1B2/SLC9A1	7
BP	GO:0000086	G2/M transition of mitotic cell cycle	36/1445	258/18862	0.000338183	0.00930005	0.00786445	FBXL22/TUBA1A/PSMA7/PSMC5/CALM1/PPP2R1A/DYNC1H1/HAUS2/DYNLL1/CDK5RAP3/CDK14/SKP1/RAD51B/TUBB4B/OPTN/PCNT/YWHAG/PSMD11/PSMB3/YWHAE/PSMC3/CALM3/NDE1/FHL1/PSMA1/PSMA6/MAPRE1/KHDRBS1/BRSK2/RAB11A/PSMD4/PRKAR2B/NAE1/PLCB1/PSMC4/PSMB5	36
BP	GO:0009636	response to toxic substance	34/1445	239/18862	0.000340408	0.00931601	0.00787795	MT1F/MT3/APOE/HBB/MAPK3/MT1G/MT2A/MT1H/HBD/CYP1B1/SOD1/PON2/HP/MT1X/RDH11/HBA1/HBA2/SLC7A11/MGST3/HBQ1/GPX4/LYN/GSTK1/MGST1/GPX3/NEFL/ARHGAP33/MPST/PDGFRB/HBG1/NQO1/SOD3/PIM1/TLR2	34
BP	GO:0032799	low-density lipoprotein receptor particle metabolic process	6/1445	14/18862	0.000350962	0.00946761	0.00800615	APOE/AP2B1/AP2S1/CLTC/FURIN/ABCA2	6
BP	GO:0032802	low-density lipoprotein particle receptor catabolic process	6/1445	14/18862	0.000350962	0.00946761	0.00800615	APOE/AP2B1/AP2S1/CLTC/FURIN/ABCA2	6
BP	GO:0098969	neurotransmitter receptor transport to postsynaptic membrane	6/1445	14/18862	0.000350962	0.00946761	0.00800615	CLSTN1/SNAP25/CPLX1/GRIPAP1/RAB11A/STX3	6
BP	GO:0032868	response to insulin	38/1445	278/18862	0.000356076	0.00956005	0.00808432	ATP6V0C/SYAP1/ATP6V1B2/NUCKS1/STXBP4/ATP6V1E1/ATP6V0A1/PRKCB/GNAI2/ATP6V1D/LPIN1/RAB10/C2CD5/PTPRN/PDK4/RAB15/SRSF5/ATP6V0B/YWHAG/SCAP/AP3S1/SLC2A8/PTPN11/IL1B/DENND4C/LYN/FOXO1/VAMP2/EPM2AIP1/FABP3/ATP6V1H/SLC9A1/PHIP/OPA1/TLR2/PIP4K2A/SORL1/SRSF4	38
BP	GO:0140353	lipid export from cell	16/1445	81/18862	0.000371442	0.00992555	0.0083934	SLC1A3/RAB3A/SPP1/TSPOAP1/GJA1/CCK/SNAP25/SLC38A2/SLC1A2/CPLX1/PTPN11/IL1B/VAMP2/STX1A/SYT1/ADORA1	16
BP	GO:0071453	cellular response to oxygen levels	33/1445	231/18862	0.000382531	0.0101739	0.00860339	MT3/PTN/PSMA7/PSMC5/DDAH1/TMBIM6/RBPJ/UBC/UBA52/AQP1/CHCHD2/SCN2A/BNIP3/UBB/ENO1/PSMD11/PSMB3/VHL/PSMC3/FOXO1/ROCK2/KCND2/PSMA1/PSMA6/SLC9A1/PPARGC1A/RGCC/ERO1A/OPA1/HIGD1A/PSMD4/PSMC4/PSMB5	33
BP	GO:0015813	L-glutamate transmembrane transport	8/1445	25/18862	0.000385928	0.0102163	0.00863925	SLC1A3/ARL6IP5/KCNJ10/ATP1A2/SLC7A11/SLC25A18/SLC1A2/ARL6IP1	8
BP	GO:0071260	cellular response to mechanical stimulus	15/1445	74/18862	0.00041939	0.0110504	0.00934465	MAPK3/GJA1/HDAC4/AQP1/ATP1A2/SLC38A2/ATP1A1/BNIP3/PTPN11/BAG3/IL1B/RAC1/SLC9A1/HABP4/CASP8AP2	15
BP	GO:0070301	cellular response to hydrogen peroxide	17/1445	90/18862	0.000428824	0.0110648	0.00935679	SIRPA/PLEKHA1/GPR37/ZNF580/CYP1B1/RPS3/AQP1/RACK1/BNIP3/KLF4/FOXO1/NET1/MAP3K5/KLF2/ANKZF1/NQO1/ANXA1	17
BP	GO:0036293	response to decreased oxygen levels	46/1445	360/18862	0.000429436	0.0110648	0.00935679	MT3/PTN/PSMA7/PSMC5/ALKBH5/DDAH1/TMBIM6/RBPJ/UBC/UBA52/AQP1/CHCHD2/ATP1B1/PAM/SCN2A/BNIP3/UBB/SCAP/ENO1/PSMD11/ARNT2/PSMB3/SLC2A8/SMAD3/VHL/PSMC3/ROCK2/KCND2/PSMA1/PSMA6/SLC9A1/KCNA5/PPARGC1A/ADORA1/RGCC/ERO1A/ALAS1/OPA1/LDHA/HIGD1A/PSMD4/PSMC4/SOD3/TLR2/PTK2B/PSMB5	46
BP	GO:0048488	synaptic vesicle endocytosis	13/1445	59/18862	0.000429701	0.0110648	0.00935679	CALM1/SH3GL2/SNCG/KIAA1109/SYP/CANX/CALM3/VAMP2/STX1A/SYT1/NLGN4X/PIP5K1C/NLGN1	13
BP	GO:0061951	establishment of protein localization to plasma membrane	13/1445	59/18862	0.000429701	0.0110648	0.00935679	BLZF1/CNST/RAB10/RACK1/OPTN/GRIPAP1/VPS35/NSF/VAMP2/ANK3/RAB26/RAB11A/VAMP5	13
BP	GO:0140238	presynaptic endocytosis	13/1445	59/18862	0.000429701	0.0110648	0.00935679	CALM1/SH3GL2/SNCG/KIAA1109/SYP/CANX/CALM3/VAMP2/STX1A/SYT1/NLGN4X/PIP5K1C/NLGN1	13
BP	GO:0045429	positive regulation of nitric oxide biosynthetic process	10/1445	38/18862	0.000437117	0.0112048	0.00947521	CLU/HBB/DDAH1/HSP90AB1/SMAD3/IL1B/KLF4/KLF2/NOS1AP/PTK2B	10
BP	GO:0009895	negative regulation of catabolic process	41/1445	312/18862	0.000487131	0.0123891	0.0104767	MT3/GOLGA2/RPL11/RPL5/HSP90AB1/CST3/SMG1/HDAC4/CDK5RAP3/HP/BSCL2/FEZ1/CHMP4B/RYBP/FEZ2/YBX1/LARP1/SNRNP70/FYN/RPS7/TIMP1/BAG6/SLIRP/TAF15/CTSA/SMAD3/N4BP1/IL1B/PRKCG/RASIP1/NELL1/FLNA/TIMP2/F8A1/PPARGC1A/ADORA1/CPTP/RPL23/FURIN/SORL1/FUS	41
BP	GO:0051668	localization within membrane	15/1445	75/18862	0.000487692	0.0123891	0.0104767	PTN/APOE/ATP1B1/CACNG3/REEP2/SLC7A11/MAL/CNIH2/CDH2/RAC1/FLNA/GLRB/GPHN/RALA/NLGN1	15
BP	GO:0060291	long-term synaptic potentiation	16/1445	83/18862	0.000494506	0.0125061	0.0105756	FAM107A/PTN/APOE/RELN/NRGN/SNAP25/NPTN/CALB1/VAMP2/SQSTM1/CALB2/MPP2/ADORA1/STX3/PTK2B/NLGN1	16
BP	GO:0071241	cellular response to inorganic substance	31/1445	216/18862	0.000522514	0.0131557	0.011125	MT1F/MT3/MAPK3/MT1G/MT2A/MT1H/PRNP/JUND/SOD1/FOSB/AQP1/MT1X/BNIP3/ATRX/SYT13/B2M/MEF2C/RASAL1/BACE1/CLIC4/FOXO1/CPNE6/SYT1/ADD1/ANK3/PPARGC1A/NQO1/HPCA/NLGN1/SYT4/DDX11	31
BP	GO:0006414	translational elongation	22/1445	134/18862	0.000530635	0.0132651	0.0112174	EEF1A1/EEF1G/EEF1D/RPLP1/EEF1A2/RACK1/MRPL24/RPLP2/MRPL57/EEF2/MRPL16/MRPS23/RPL30/MRPL17/MRPS6/MRPL41/MRPS36/MRPL37/LTN1/MRPS33/MRPL45/SRP9	22
BP	GO:0007215	glutamate receptor signaling pathway	12/1445	53/18862	0.000544553	0.0132651	0.0112174	PLP1/PRNP/GRIA2/KCNB1/FYN/GRIN1/NECAB2/GRM4/HOMER1/PLCB1/PTK2B/GRM8	12
BP	GO:0097120	receptor localization to synapse	12/1445	53/18862	0.000544553	0.0132651	0.0112174	CLSTN1/SNAP25/NPTN/CACNG3/CNIH2/CPLX1/GRIPAP1/GPHN/RAB11A/HRAS/STX3/NLGN1	12
BP	GO:0010273	detoxification of copper ion	6/1445	15/18862	0.000547127	0.0132651	0.0112174	MT1F/MT3/MT1G/MT2A/MT1H/MT1X	6
BP	GO:0015671	oxygen transport	6/1445	15/18862	0.000547127	0.0132651	0.0112174	HBB/HBD/HBA1/HBA2/HBQ1/HBG1	6
BP	GO:1903540	establishment of protein localization to postsynaptic membrane	6/1445	15/18862	0.000547127	0.0132651	0.0112174	CLSTN1/SNAP25/CPLX1/GRIPAP1/RAB11A/STX3	6
BP	GO:1990169	stress response to copper ion	6/1445	15/18862	0.000547127	0.0132651	0.0112174	MT1F/MT3/MT1G/MT2A/MT1H/MT1X	6
BP	GO:0043001	Golgi to plasma membrane protein transport	10/1445	39/18862	0.00054793	0.0132651	0.0112174	BLZF1/CNST/RAB10/RACK1/OPTN/NSF/VAMP2/ANK3/RAB26/VAMP5	10
BP	GO:1904407	positive regulation of nitric oxide metabolic process	10/1445	39/18862	0.00054793	0.0132651	0.0112174	CLU/HBB/DDAH1/HSP90AB1/SMAD3/IL1B/KLF4/KLF2/NOS1AP/PTK2B	10
BP	GO:0099637	neurotransmitter receptor transport	11/1445	46/18862	0.000560643	0.0135151	0.0114288	CALY/CLSTN1/SNAP25/CACNG3/AP2B1/CPLX1/GRIPAP1/VPS35/RAB11A/STX3/HPCA	11
BP	GO:0070482	response to oxygen levels	48/1445	385/18862	0.000568843	0.0136546	0.0115469	MT3/PTN/PSMA7/PSMC5/ALKBH5/DDAH1/TMBIM6/RBPJ/UBC/UBA52/AQP1/CHCHD2/ATP1B1/PAM/SCN2A/BNIP3/UBB/SCAP/ENO1/PSMD11/ARNT2/PSMB3/SLC2A8/SMAD3/VHL/PSMC3/FOXO1/ROCK2/KCND2/PSMA1/PSMA6/SLC9A1/KCNA5/PPARGC1A/ADORA1/RGCC/ERO1A/ALAS1/OPA1/LDHA/HIGD1A/PSMD4/PDGFRB/PSMC4/SOD3/TLR2/PTK2B/PSMB5	48
BP	GO:0071248	cellular response to metal ion	28/1445	189/18862	0.000572027	0.0136731	0.0115625	MT1F/MT3/MAPK3/MT1G/MT2A/MT1H/PRNP/JUND/SOD1/FOSB/AQP1/MT1X/BNIP3/SYT13/B2M/MEF2C/RASAL1/BACE1/CLIC4/CPNE6/SYT1/ADD1/ANK3/PPARGC1A/NQO1/HPCA/NLGN1/SYT4	28
BP	GO:0010976	positive regulation of neuron projection development	24/1445	153/18862	0.000601615	0.01426	0.0120588	PTN/APOE/ENC1/RELN/MARK2/CAMK1D/COBL/FEZ1/NPTN/NDRG4/ATP1B2/FYN/PPP2R5B/LYN/FKBP1B/SCARB2/FLNA/DDX56/ANKRD27/PLPPR5/FBXO38/OPA1/NCKIPSD/PTK2B	24
BP	GO:0035567	non-canonical Wnt signaling pathway	24/1445	153/18862	0.000601615	0.01426	0.0120588	CAMK2A/PSMA7/PSMC5/CALM1/PPP3R1/DAAM2/AP2B1/PSMD11/AP2S1/PSMB3/GNAO1/PARD6A/PSMC3/RAC1/FZD3/PSMA1/PSMA6/CLTC/PSMD4/PLCB1/PSMC4/PSMB5/FRZB/TNRC6B	24
BP	GO:0044839	cell cycle G2/M phase transition	37/1445	276/18862	0.000614749	0.0145106	0.0122707	FBXL22/TUBA1A/PSMA7/PSMC5/CALM1/PPP2R1A/DYNC1H1/HAUS2/DYNLL1/CDK5RAP3/CDK14/SKP1/RAD51B/TUBB4B/OPTN/PCNT/YWHAG/PSMD11/PSMB3/YWHAE/PSMC3/CALM3/NPM1/NDE1/FHL1/PSMA1/PSMA6/MAPRE1/KHDRBS1/BRSK2/RAB11A/PSMD4/PRKAR2B/NAE1/PLCB1/PSMC4/PSMB5	37
BP	GO:0034976	response to endoplasmic reticulum stress	39/1445	296/18862	0.000626783	0.0147333	0.012459	CLU/TMBIM6/TPP1/ACADVL/FBXO2/CDK5RAP3/ATG10/RACK1/KLHDC3/MANF/EEF2/UBE4A/SDF2L1/BAG6/CANX/SEC31A/PPP2R5B/THBS4/UBQLN2/FOXRED2/WFS1/MAP3K5/ADD1/ERMP1/TMCO1/DDIT3/ERO1A/OPA1/ANKZF1/BRSK2/FICD/CEBPB/UBE2J1/EXTL3/FBXO27/RNF175/DDX11/HDGF/ERLEC1	39
BP	GO:0006536	glutamate metabolic process	9/1445	33/18862	0.000632763	0.0148086	0.0125227	GLUD1/ATCAY/GAD2/SLC7A11/ALDH4A1/ALDH5A1/GLUD2/GLUL/GAD1	9
BP	GO:0006364	rRNA processing	32/1445	228/18862	0.000635216	0.0148086	0.0125227	RPL11/RPS14/RPL5/RPL35/RPS24/RPS25/RPS27/RPS6/RPS21/PA2G4/RPL27/RPS8/RPL26/EXOSC2/RPS7/RPL10A/TRMT112/SART1/DDX17/DDX27/NSA2/RPS28/SBDS/NAT10/SNU13/DDX56/TSR2/RPS9/RPS19/UTP11/RPF2/NOC4L	32
BP	GO:0043409	negative regulation of MAPK cascade	27/1445	181/18862	0.000637915	0.0148106	0.0125244	CAMK2N1/APOE/RGS4/PPP2R1A/DUSP3/SIRPA/CDK5RAP3/SPRED1/DUSP8/NDRG2/DUSP19/DUSP26/LMO3/MAPK8IP1/UCHL1/CYLD/PPP2CA/DNAJA1/IL1B/KLF4/LYN/FOXO1/RNF149/DUSP6/DUSP1/GPS1/SORL1	27
BP	GO:0140056	organelle localization by membrane tethering	26/1445	172/18862	0.000649889	0.0149593	0.0126501	RAB3A/TUBA1A/PPP2R1A/AHCYL1/DYNC1H1/HAUS2/DYNLL1/SNAP25/RAB10/KCNB1/TUBB4B/NDRG4/RAB15/PCNT/YWHAG/EXOC6B/YWHAE/NSF/STX1A/SYT1/NDE1/MAPRE1/ESYT1/RAB11A/PRKAR2B/STX3	26
BP	GO:0033238	regulation of cellular amine metabolic process	15/1445	77/18862	0.000653144	0.0149593	0.0126501	PSMA7/PSMC5/GPR37/ATCAY/SLC7A11/PSMD11/PSMB3/PSMC3/PSMA1/PSMA6/PSMD4/PSMC4/NQO1/PSMB5/OAZ1	15
BP	GO:0016072	rRNA metabolic process	33/1445	238/18862	0.000654881	0.0149593	0.0126501	RPL11/RPS14/RPL5/RPL35/RPS24/RPS25/SLFN13/RPS27/RPS6/RPS21/PA2G4/RPL27/RPS8/RPL26/EXOSC2/RPS7/RPL10A/TRMT112/SART1/DDX17/DDX27/NSA2/RPS28/SBDS/NAT10/SNU13/DDX56/TSR2/RPS9/RPS19/UTP11/RPF2/NOC4L	33
BP	GO:0051924	regulation of calcium ion transport	33/1445	238/18862	0.000654881	0.0149593	0.0126501	PLP1/CAMK2A/CALM1/RGS4/PRNP/TMBIM6/GJA1/GNAI2/ATP1A2/ATP1B1/SARAF/CEMIP/APLNR/FKBP1A/FYN/GRIN1/GNAO1/YWHAE/CALM3/LYN/FKBP1B/SPHK2/WFS1/CALM2/CACNB4/CACNA1C/SLC9A1/NOS1AP/HOMER1/PDGFRB/HPCA/PTK2B/STAC2	33
BP	GO:0051592	response to calcium ion	23/1445	145/18862	0.000660553	0.0150283	0.0127084	SPARC/CALM1/AHCYL1/JUND/GDI1/FOSB/SYT13/SEC31A/MEF2C/RASAL1/CALM3/CLIC4/CPNE6/SYT1/CALM2/ADD1/DUSP1/PEF1/HOMER1/HPCA/PTK2B/NLGN1/SYT4	23
BP	GO:0050821	protein stabilization	28/1445	191/18862	0.000677812	0.0152416	0.0128888	MT3/CLU/HSPA1B/RPL11/RPL5/STXBP4/HSP90AB1/TRIM44/ATP1B1/MCM8/ATP1B3/ATP1B2/CCT7/GAPDH/RTN4/RPS7/BAG6/SWSAP1/SMAD3/VHL/BAG3/WFS1/FLNA/TESC/PPARGC1A/RPL23/PIM1/PFN2	28
BP	GO:0031629	synaptic vesicle fusion to presynaptic active zone membrane	7/1445	21/18862	0.000680691	0.0152416	0.0128888	RAB3A/PRRT2/SNAP25/CPLX1/STX1A/SYT1/STX3	7
BP	GO:0099500	vesicle fusion to plasma membrane	7/1445	21/18862	0.000680691	0.0152416	0.0128888	RAB3A/PRRT2/SNAP25/CPLX1/STX1A/SYT1/STX3	7
BP	GO:1902307	positive regulation of sodium ion transmembrane transport	7/1445	21/18862	0.000680691	0.0152416	0.0128888	ATP1B1/ATP1B3/ATP1B2/ANK3/SLC9A1/TESC/FXYD1	7
BP	GO:0006735	NADH regeneration	8/1445	27/18862	0.000690141	0.0152721	0.0129146	ALDOC/PFKP/ENO2/PFKL/GAPDH/ENO1/TPI1/PGM2L1	8
BP	GO:0061621	canonical glycolysis	8/1445	27/18862	0.000690141	0.0152721	0.0129146	ALDOC/PFKP/ENO2/PFKL/GAPDH/ENO1/TPI1/PGM2L1	8
BP	GO:0061718	glucose catabolic process to pyruvate	8/1445	27/18862	0.000690141	0.0152721	0.0129146	ALDOC/PFKP/ENO2/PFKL/GAPDH/ENO1/TPI1/PGM2L1	8
BP	GO:1990138	neuron projection extension	25/1445	164/18862	0.000721287	0.0158068	0.0133668	MT3/APOE/LLPH/DIP2B/HSP90AB1/GDI1/MAP2/SH3GL2/NRCAM/SHTN1/RTN4/OLFM1/DCLK1/RASAL1/CPNE6/SYT1/ULK2/PAK6/AUTS2/FLRT3/NDN/DSCAM/RAB11A/SLC9A6/SYT4	25
BP	GO:0042982	amyloid precursor protein metabolic process	17/1445	94/18862	0.000722522	0.0158068	0.0133668	CLU/APOE/RTN1/PRNP/ITM2C/RTN3/FKBP1A/RTN4/ITM2A/NECAB2/BACE1/LYN/ROCK2/ITM2B/DYRK1A/SORL1/ABCA2	17
BP	GO:0031644	regulation of nervous system process	22/1445	137/18862	0.000722674	0.0158068	0.0133668	RGS4/MGLL/RELN/NPTX2/CCK/SCN11A/TYMP/FABP5/CNIH2/GRIN1/DLGAP2/ZFHX2/STX1A/ROCK2/SLC9A1/SOX10/ADORA1/NLGN4X/HOMER1/TPPP/PTK2B/NLGN1	22
BP	GO:2000377	regulation of reactive oxygen species metabolic process	28/1445	192/18862	0.000736852	0.0159031	0.0134482	MT3/CLU/HBB/DDAH1/HSP90AB1/SIRPA/HDAC4/GNAI2/CYP1B1/SOD1/DYNLL1/HP/BNIP3/SLC5A3/FYN/GRIN1/SMAD3/IL1B/KLF4/RAC1/ROCK2/SPHK2/KLF2/KHSRP/NOS1AP/PDGFRB/PRCP/PTK2B	28
BP	GO:0051402	neuron apoptotic process	32/1445	230/18862	0.000739126	0.0159031	0.0134482	MT3/APOE/PRNP/CIT/HSP90AB1/HDAC4/SET/SOD1/KCNB1/SCN2A/FAIM2/BNIP3/PTPRZ1/GAPDH/FYN/CRLF1/XIAP/MEF2C/PRKCG/BACE1/GRM4/TRIM2/WFS1/MAP3K12/DDIT3/PPARGC1A/NEFL/CEBPB/HRAS/NAE1/NQO1/PTK2B	32
BP	GO:0098657	import into cell	32/1445	230/18862	0.000739126	0.0159031	0.0134482	SLC1A3/ACTB/ATP1A3/RGS4/PRNP/CALY/ARL6IP5/KCNJ10/SNAP25/SLC47A1/ATP1A2/ATP1B1/ATP1A1/CACNG3/ATP1B3/SLC38A1/ATP1B2/SLC7A11/SLC5A3/AP2B1/SLC1A2/FYN/ISCU/ARL6IP1/FABP3/SLC9A1/SLC12A7/LTF/ACSL5/GLUL/HPCA/SLC9A6	32
BP	GO:0030901	midbrain development	16/1445	86/18862	0.000743921	0.0159031	0.0134482	PLP1/ACTB/GLUD1/CKB/YWHAH/CALM1/DYNLL1/NDRG2/ZNF430/CCDC14/S100A1/YWHAE/CALM3/FZD3/CALM2/ZNF148	16
BP	GO:0048013	ephrin receptor signaling pathway	16/1445	86/18862	0.000743921	0.0159031	0.0134482	ACTB/CHN1/ARPC3/RBPJ/SIPA1L1/AP2B1/FYN/AP2S1/GRIN1/PTPN11/LYN/EPHB6/RAC1/ROCK2/ARPC1B/HRAS	16
BP	GO:0051952	regulation of amine transport	16/1445	86/18862	0.000743921	0.0159031	0.0134482	CHGA/RAB3A/RGS4/CCK/ARL6IP5/ATP1A2/KCNB1/SNCG/SYT13/STX1A/SV2A/SYT1/ARL6IP1/HTR2A/ADORA1/SYT4	16
BP	GO:0140029	exocytic process	15/1445	78/18862	0.000752361	0.016023	0.0135496	RAB3A/PRRT2/NAPB/SNAP25/RAB10/KCNB1/RAB15/EXOC6B/CPLX1/LYN/STX1A/SV2A/SYT1/STX3/NLGN1	15
BP	GO:0009612	response to mechanical stimulus	29/1445	202/18862	0.000773631	0.0163566	0.0138317	PTN/MAPK3/GJA1/JUND/HDAC4/FOSB/AQP1/ATP1A2/SLC38A2/ATP1A1/BNIP3/FYN/DCN/SCN1A/NFKBIA/CDH2/PTPN11/BAG3/IL1B/BACE1/RAC1/KIT/SLC9A1/HTR2A/KCNA5/HABP4/STRA6/CASP8AP2/PTK2B	29
BP	GO:0031529	ruffle organization	12/1445	55/18862	0.000776684	0.0163566	0.0138317	SNX10/PLEKHA1/COBL/EVL/FAM98A/RAC1/RHOG/PLEKHM1/HRAS/NLGN1/PFN2/AIF1	12
BP	GO:2000300	regulation of synaptic vesicle exocytosis	12/1445	55/18862	0.000776684	0.0163566	0.0138317	RAB3A/CALM1/NCS1/PRKCB/SYP/CHRNA5/PRKCG/BACE1/CALM3/SYT1/HTR2A/NLGN1	12
BP	GO:0006885	regulation of pH	18/1445	103/18862	0.000779624	0.0163577	0.0138326	ATP6V0C/ATP6V1B2/MAPK3/ATP6V1E1/ATP6V0A1/TMEM9/ATP6V1D/PDK4/ATP6V0B/CCKBR/TMEM175/CLIC4/SLC26A4/ATP6V1H/SLC9A1/CA2/ATP6AP2/SLC9A6	18
BP	GO:0010970	transport along microtubule	24/1445	156/18862	0.000798827	0.0166987	0.014121	NEFH/DYNC1H1/CALY/SOD1/MAP2/DYNLL1/FEZ1/UBB/MAPK8IP3/CNIH2/AP3S1/RHOT2/HSPB1/BAG3/DYNLRB1/KIF3B/DYNC1I1/NDE1/FYCO1/PEX14/OPA1/NEFL/ARHGAP21/KIFAP3	24
BP	GO:0140354	lipid import into cell	9/1445	34/18862	0.000802697	0.0167179	0.0141373	SLC1A3/ARL6IP5/KCNJ10/ATP1A2/SLC7A11/SLC1A2/ARL6IP1/FABP3/ACSL5	9
BP	GO:1904181	positive regulation of membrane depolarization	5/1445	11/18862	0.00081806	0.0169311	0.0143175	CCK/RACK1/DCN/MLLT11/ANK3	5
BP	GO:0090083	regulation of inclusion body assembly	6/1445	16/18862	0.000818908	0.0169311	0.0143175	CLU/HSPA1B/PSMC5/SNCAIP/DNAJB1/SORL1	6
BP	GO:0048771	tissue remodeling	26/1445	175/18862	0.000846052	0.0174287	0.0147383	PTN/SPP1/SNX10/GJA1/TPP1/CST3/RBPJ/PDK4/IL18/TMBIM1/CAPN1/GPR137B/S1PR1/TIMP1/BGN/MEF2C/THBS4/RAC1/TFRC/ROCK2/FLNA/IGFBP5/PLEKHM1/CA2/LTBP3/PTK2B	26
BP	GO:0006906	vesicle fusion	18/1445	104/18862	0.000876605	0.0179926	0.0152152	RAB3A/PRRT2/SNAP25/C2CD5/TMEM175/SYT13/VPS8/CPLX1/TAP1/VAMP2/STX1A/SYT1/VPS41/ANKRD27/STX3/PIP4K2A/SYT4/ANXA1	18
BP	GO:0001933	negative regulation of protein phosphorylation	45/1445	362/18862	0.000884467	0.0180885	0.0152962	CAMK2N1/APOE/CALM1/RGS4/PPP2R1A/PRNP/CIT/DUSP3/SIRPA/CDK5RAP3/SPRED1/DUSP8/RACK1/SH3GL2/DUSP19/DUSP26/YWHAG/MAPK8IP1/UCHL1/PPP2CA/MLLT1/DNAJA1/HSPB1/PARD6A/IL1B/RASIP1/CALM3/LYN/NPM1/DUSP22/SMYD3/ADAR/CALM2/TESC/PRKRIP1/PPARGC1A/DUSP6/DUSP1/PRKAR2B/TESK1/GPS1/PTPRO/SORL1/PYDC1/NR2F2	45
BP	GO:0061620	glycolytic process through glucose-6-phosphate	8/1445	28/18862	0.000901937	0.0183794	0.0155423	ALDOC/PFKP/ENO2/PFKL/GAPDH/ENO1/TPI1/PGM2L1	8
BP	GO:0006941	striated muscle contraction	26/1445	176/18862	0.000921997	0.0187208	0.015831	CHGA/CALM1/GJA1/HDAC4/ATP1A2/ATP1B1/ATP1A1/SNTA1/EEF2/SCN1A/SYNM/CALM3/FKBP1B/MYH7/CALM2/FLNA/CACNA1C/SLC9A1/DTNA/KCNA5/ADORA1/TNNT1/NOS1AP/HOMER1/STAC2/MYH14	26
BP	GO:0043254	regulation of protein-containing complex assembly	53/1445	446/18862	0.000941361	0.0190458	0.0161058	GFAP/SCIN/RAB3A/CLU/APOE/HSPA1B/PRRT2/PSMC5/ARPC3/ADD3/CALY/NAPB/LMO4/CDC42EP4/CCK/MAP2/RPS3/RACK1/CLIP3/ERCC5/GNL3L/FERMT2/VASP/EVL/ARPC5L/PTPN11/RPL13A/SPTAN1/PPP2R5B/PSMC3/RASIP1/STX1A/RAC1/TFRC/MED25/ADD1/CSF3/TMSB15B/VDAC2/DYRK1A/ANKRD27/MAPRE1/PSRC1/CPTP/EML2/ARPC1B/COTL1/PSMC4/SAR1A/TPPP/PTK2B/PFN2/SORL1	53
BP	GO:0022618	ribonucleoprotein complex assembly	31/1445	224/18862	0.000968906	0.0194784	0.0164716	RPL38/RPL24/RPL11/RPS14/CELF5/RPL5/HSP90AB1/RPS27/RPSA/RPL23A/RPS10/EIF3C/XRCC5/RPS27L/SRSF5/RPL3/SNRPD3/YTHDC1/SART1/RPL13A/SF1/EIF2S3/RPS28/ADAR/DDX1/CLNS1A/PRPF6/RPS19/CELF6/RPF2/GCFC2	31
BP	GO:0061337	cardiac conduction	23/1445	149/18862	0.000969623	0.0194784	0.0164716	ATP1A3/CALM1/AHCYL1/GJA1/ATP1A2/ATP1B1/ATP1A1/CACNG3/ATP1B3/ATP1B2/YWHAE/CALM3/FKBP1B/KCND2/CALM2/FLNA/CACNB4/CACNA1C/SLC9A1/KCNIP1/KCNA5/FXYD1/FXYD7	23
BP	GO:1902305	regulation of sodium ion transmembrane transport	13/1445	64/18862	0.000975191	0.019521	0.0165077	YWHAH/ATP1A2/ATP1B1/STK39/ATP1B3/ATP1B2/STOM/SNTA1/ANK3/SLC9A1/TESC/FXYD1/FXYD7	13
BP	GO:0035418	protein localization to synapse	15/1445	80/18862	0.000989515	0.0197293	0.0166838	CLSTN1/SNAP25/NPTN/CACNG3/MAPK8IP3/CNIH2/CPLX1/GRIPAP1/HSPB1/BSN/GPHN/RAB11A/HRAS/STX3/NLGN1	15
BP	GO:0019882	antigen processing and presentation	32/1445	234/18862	0.00099256	0.0197293	0.0166838	PSMA7/PSMC5/DYNC1H1/DYNLL1/RAB10/SH3GL2/HLA-DPB1/DYNC1LI2/AP2B1/PSMD11/AP2S1/PSMB3/B2M/ERAP2/CANX/SEC31A/RAB5B/TAP1/PSMC3/KIF3B/DYNC1I1/PSMA1/PSMA6/ITGB5/CLTC/PSMD4/CTSL/KIFAP3/CD74/PSMC4/KLC2/PSMB5	32
BP	GO:0030111	regulation of Wnt signaling pathway	45/1445	365/18862	0.00104939	0.020786	0.0175774	APOE/ATP6V0C/PSMA7/PSMC5/PPP2R1A/GPRC5B/TMEM9/RBPJ/APCDD1/CDK14/ZRANB1/VGLL4/RACK1/ILK/PFDN5/DAAM2/PSMD11/CYLD/PPP2CA/PSMB3/XIAP/CBFB/AMER2/IGFBP4/CDH2/APC2/SMAD3/PSMC3/IGFBP6/CXXC4/PSMA1/PSMA6/SMARCA4/SOX10/DDIT3/EMD/PSMD4/PPM1B/PSMC4/ATP6AP2/TLR2/PTPRO/PSMB5/FRZB/MESP1	45
BP	GO:0015718	monocarboxylic acid transport	26/1445	178/18862	0.00109181	0.0215509	0.0182242	SLC1A3/RAB3A/PNPLA8/TSPOAP1/GJA1/CCK/ARL6IP5/KCNJ10/SNAP25/ATP1A2/SLC38A2/SLC7A11/SLC25A18/SLC1A2/CPLX1/IL1B/VAMP2/STX1A/SYT1/ARL6IP1/MPC1/ADORA1/SLC6A8/SLC6A12/STRA6/ANXA1	26
BP	GO:0009063	cellular amino acid catabolic process	18/1445	106/18862	0.0011018	0.0216725	0.018327	GLUD1/DDAH1/CSAD/GPT2/GCSH/IDO2/GAD2/QDPR/ALDH4A1/ALDH5A1/GLUD2/HOGA1/DLD/OGDH/GLUL/PCBD1/BCKDK/GAD1	18
BP	GO:0032869	cellular response to insulin stimulus	31/1445	226/18862	0.0011226	0.0220053	0.0186084	ATP6V0C/SYAP1/ATP6V1B2/NUCKS1/STXBP4/ATP6V1E1/ATP6V0A1/PRKCB/GNAI2/ATP6V1D/LPIN1/RAB10/C2CD5/PDK4/RAB15/SRSF5/ATP6V0B/YWHAG/AP3S1/SLC2A8/PTPN11/IL1B/DENND4C/FOXO1/VAMP2/ATP6V1H/SLC9A1/PHIP/OPA1/PIP4K2A/SORL1	31
BP	GO:1990748	cellular detoxification	19/1445	115/18862	0.00114253	0.0222881	0.0188476	MT3/APOE/HBB/HBD/SOD1/HP/RDH11/HBA1/HBA2/MGST3/HBQ1/GPX4/GSTK1/MGST1/GPX3/HBG1/NQO1/SOD3/PIM1	19
BP	GO:0030073	insulin secretion	29/1445	207/18862	0.0011449	0.0222881	0.0188476	CHGA/CAMK2N1/GLUD1/STXBP4/GJA1/PFKL/VSNL1/DYNLL1/SNAP25/RAPGEF4/KCNB1/PTPRN/CPLX1/PTPN11/IL1B/STX1A/FKBP1B/RAC1/HMGN3/SNX19/CACNA1C/TM7SF3/KCNA5/BRSK2/SLC25A6/PTPRN2/NNAT/NADK/ANXA1	29
BP	GO:0061615	glycolytic process through fructose-6-phosphate	8/1445	29/18862	0.00116279	0.0224819	0.0190115	ALDOC/PFKP/ENO2/PFKL/GAPDH/ENO1/TPI1/PGM2L1	8
BP	GO:1900027	regulation of ruffle assembly	8/1445	29/18862	0.00116279	0.0224819	0.0190115	COBL/EVL/FAM98A/RHOG/PLEKHM1/HRAS/NLGN1/PFN2	8
BP	GO:0061687	detoxification of inorganic compound	6/1445	17/18862	0.00118404	0.0227769	0.0192609	MT1F/MT3/MT1G/MT2A/MT1H/MT1X	6
BP	GO:0051091	positive regulation of DNA-binding transcription factor activity	35/1445	266/18862	0.00118608	0.0227769	0.0192609	CAMK2A/CLU/HSPA1B/ZIC2/RELN/PRKCB/UBC/UBA52/HDAC4/ZBTB7A/CAMK1D/RPS3/BEX1/UBB/IL18/NDP/UBE2V1/SMAD3/LRRFIP1/IL1B/PPP2R5B/TFRC/KIT/NPM1/S100A8/STK36/PSMA6/SMARCA4/LTF/CSF3/TRIM37/DDIT3/PPARGC1A/RGCC/TLR2	35
BP	GO:0030900	forebrain development	44/1445	357/18862	0.00119282	0.0228287	0.0193048	PTN/RELN/RBPJ/NRGN/CHD5/AQP1/ATP1A2/SLC38A2/FEZ1/BNIP3/UBB/ADGRG1/NPY/ATP1B2/POU3F2/SLC7A11/TACC1/NEUROD6/RTN4/ATRX/OLIG2/FYN/PTCHD1/DCLK1/B2M/GNAO1/CDH2/BCAN/ZMIZ1/NDE1/LHX6/FLNA/PPARGC1A/PHACTR1/SATB2/NEFL/ARX/DNAJB1/ALDH1A3/PLCB1/TRA2B/SLC32A1/SSTR2/NR2F2	44
BP	GO:0032886	regulation of microtubule-based process	31/1445	227/18862	0.00120711	0.0230245	0.0194704	FAM107A/HSPA1B/NEFH/DYNC1H1/CALY/MARK2/MAP6D1/MAP2/RPS3/STMN3/FEZ1/CLIP3/CHMP4B/CNIH2/CHMP5/RBM14/CYLD/APC2/KLHL42/RAC1/NPM1/ROCK2/NAT10/TRIM37/DYRK1A/CDK2AP2/MAPRE1/PSRC1/CLTC/EML2/TPPP	31
BP	GO:0021987	cerebral cortex development	18/1445	107/18862	0.00123173	0.0234153	0.0198008	RELN/SLC38A2/BNIP3/ADGRG1/NPY/POU3F2/TACC1/RTN4/CDH2/ZMIZ1/NDE1/LHX6/FLNA/PHACTR1/NEFL/ARX/PLCB1/TRA2B	18
BP	GO:0035249	synaptic transmission, glutamatergic	16/1445	90/18862	0.00123699	0.0234367	0.0198189	NAPB/RELN/ATP1A2/GRIA2/CACNG3/CNIH2/MEF2C/CDH2/GRM4/SYT1/HTR2A/ADORA1/HOMER1/PTK2B/NLGN1/GRM8	16
BP	GO:0034248	regulation of cellular amide metabolic process	57/1445	494/18862	0.00124831	0.0235722	0.0199335	RPL38/CLU/APOE/CNOT2/RPS14/RPL5/MAPK3/RTN1/ENC1/PRNP/VIM/RPS4X/EIF1/RPS3/EIF3C/RACK1/PDK4/RPS27L/RTN3/PA2G4/YBX1/LARP1/RPL26/PUM1/SLC7A11/GAPDH/RTN4/EEF2/ACO1/AIRE/HSPB1/ATXN2/EIF2B4/RPL13A/RPL30/EIF2S3/EIF1B/RBM3/NPM1/ROCK2/PAIP2B/SPHK2/DDX1/IGFBP5/NAT10/KHSRP/RPS9/KHDRBS1/HABP4/FXR1/LTN1/EIF4G3/PTK2B/SORL1/SRP9/ABCA2/TNRC6B	57
BP	GO:0099173	postsynapse organization	24/1445	161/18862	0.00125279	0.0235783	0.0199387	ACTB/PTN/APOE/PDLIM5/NEFH/GAP43/PRNP/RELN/SLC7A11/SIPA1L1/FYN/VPS35/CDH2/GLRB/NLGN4X/OPA1/NEFL/ARHGAP33/GPHN/NOS1AP/TANC2/HOMER1/NLGN1/CNKSR2	24
BP	GO:0045851	pH reduction	12/1445	58/18862	0.0012756	0.023928	0.0202344	ATP6V0C/ATP6V1B2/ATP6V1E1/ATP6V0A1/TMEM9/ATP6V1D/ATP6V0B/CCKBR/CLIC4/ATP6V1H/CA2/ATP6AP2	12
BP	GO:0008286	insulin receptor signaling pathway	22/1445	143/18862	0.00129268	0.0241684	0.0204376	ATP6V0C/ATP6V1B2/NUCKS1/STXBP4/ATP6V1E1/ATP6V0A1/PRKCB/GNAI2/ATP6V1D/C2CD5/PDK4/ATP6V0B/AP3S1/SLC2A8/PTPN11/IL1B/FOXO1/ATP6V1H/PHIP/OPA1/PIP4K2A/SORL1	22
BP	GO:0072578	neurotransmitter-gated ion channel clustering	5/1445	12/18862	0.0013142	0.0243298	0.0205742	APOE/SLC7A11/GLRB/GPHN/NLGN1	5
BP	GO:1902950	regulation of dendritic spine maintenance	5/1445	12/18862	0.0013142	0.0243298	0.0205742	APOE/PRNP/FYN/VPS35/HOMER1	5
BP	GO:1905907	negative regulation of amyloid fibril formation	5/1445	12/18862	0.0013142	0.0243298	0.0205742	CLU/APOE/PFDN5/PFDN2/LDLR	5
BP	GO:0001659	temperature homeostasis	25/1445	171/18862	0.00132973	0.0245372	0.0207495	DYNC1H1/GJA1/ACADVL/RBPJ/SCD/LPIN1/BSCL2/FABP5/IL18/IL4R/GNAS/IL1B/GADD45G/FOXO1/MFN2/ADIPOR2/ABHD6/HTR2A/DDIT3/PPARGC1A/ADORA1/PLCL2/CEBPB/KDM3A/DECR1	25
BP	GO:0042493	response to drug	44/1445	359/18862	0.0013343	0.0245417	0.0207533	PTN/HSP90AB1/APOD/HDAC4/ARL6IP5/SOD1/FOSB/XRCC5/ADIRF/SCN11A/PAM/ATP1A1/GAD2/EEF2/FYN/RPN2/B2M/GNAO1/MEF2C/GNAS/QDPR/IL1B/LYN/TFRC/MGST1/ADIPOR2/FZD3/FABP3/RPP21/TIMP2/HTR2A/RNF149/SOX10/PPARGC1A/GNPAT/DUSP6/LDHA/PLIN2/PRKAR2B/NQO1/PTK2B/ANXA1/ABCA2/GAD1	44
BP	GO:0016054	organic acid catabolic process	34/1445	258/18862	0.00134627	0.0246816	0.0208717	GLUD1/CYP4F3/DDAH1/ACADVL/CSAD/CRABP1/LPIN1/GPT2/GCSH/DBT/IDO2/GAD2/PPM1K/QDPR/GNPDA1/ECHS1/ALDH4A1/ALDH5A1/GLUD2/ETFDH/HOGA1/ACAD11/DLD/OGDH/GLUL/MPST/PCBD1/PHYH/BCKDK/HSD17B10/CPT1C/ACAT2/DECR1/GAD1	34
BP	GO:0016050	vesicle organization	42/1445	339/18862	0.00137595	0.0251444	0.021263	RAB3A/GOLGA2/PRRT2/SNX10/TMEM9/SNAP25/C2CD5/PTPRN/CHMP4B/ALS2/CNIH2/SCAP/CHMP5/TMEM175/SYT13/VPS8/CPLX1/SYP/SEC31A/RAB5B/TAP1/TRAPPC2L/NSF/VAMP2/STX1A/SCARB2/SYT1/VPS41/SQSTM1/SNX19/CTSZ/CD59/ANKRD27/PEF1/RAB11A/TRAPPC6B/SAR1A/STX3/TRAPPC1/PIP4K2A/SYT4/ANXA1	42
BP	GO:0022406	membrane docking	26/1445	181/18862	0.00139712	0.0253566	0.0214424	RAB3A/TUBA1A/PPP2R1A/AHCYL1/DYNC1H1/HAUS2/DYNLL1/SNAP25/RAB10/KCNB1/TUBB4B/NDRG4/RAB15/PCNT/YWHAG/EXOC6B/YWHAE/NSF/STX1A/SYT1/NDE1/MAPRE1/ESYT1/RAB11A/PRKAR2B/STX3	26
BP	GO:0006636	unsaturated fatty acid biosynthetic process	11/1445	51/18862	0.00140574	0.0253566	0.0214424	PNPLA8/PTGDS/MIF/SCD/FABP5/FADS2/FADS1/IL1B/ELOVL4/CD74/ANXA1	11
BP	GO:0019674	NAD metabolic process	11/1445	51/18862	0.00140574	0.0253566	0.0214424	ALDOC/PFKP/ENO2/PFKL/GAPDH/ENO1/TPI1/PGM2L1/LDHA/NADK/NQO1	11
BP	GO:0043271	negative regulation of ion transport	40/1445	319/18862	0.00140974	0.0253566	0.0214424	CHGA/PEA15/APOE/CALM1/RGS4/TMBIM6/PFKL/PRKCB/VSNL1/APOD/GDI1/ARL6IP5/ATP1A2/KCNB1/FABP5/STK39/CABP1/GNAO1/YWHAE/PTPN11/BAG3/IL1B/CALM3/ISCU/FKBP1B/FIS1/RSAD2/CALM2/ANK3/HTR2A/ADORA1/UBE2J1/CD74/PTK2B/SYT4/ANXA1/ABCA2/OAZ1/ERLEC1/SP100	40
BP	GO:0006814	sodium ion transport	32/1445	239/18862	0.00141373	0.0253566	0.0214424	ATP1A3/YWHAH/AHCYL1/ATP1A2/ATP1B1/SCN11A/SLC38A2/SCN2A/ATP1A1/STK39/ATP1B3/SLC38A1/ATP1B2/STOM/SLC24A3/SNTA1/SLC5A3/SLC13A4/SCN1A/NKAIN2/ANK3/COMMD9/SLC9A1/TESC/KLHL3/SGK1/SLC6A8/SLC6A12/FXYD1/NKAIN4/SLC9A6/FXYD7	32
BP	GO:0030001	metal ion transport	56/1445	486/18862	0.00141442	0.0253566	0.0214424	PLP1/MT3/CAMK2A/ATP1A3/GPM6A/CALM1/RGS4/TPT1/PRNP/TMBIM6/GJA1/RAMP1/NCS1/PRKCB/GNAI2/ATP1A2/ATP1B1/SARAF/ATP1A1/CEMIP/APLNR/CACNG3/ATP1B3/ATP1B2/FKBP1A/SLC24A3/FYN/SLC30A3/GRIN1/GNAO1/YWHAE/CALM3/LYN/FKBP1B/SPHK2/WFS1/CALM2/CACNB4/MRS2/CACNA1C/SLC9A1/HTR2A/TMCO1/DDIT3/KCNA5/ERO1A/RASA3/OPA1/NOS1AP/FXYD1/HOMER1/PDGFRB/HPCA/STOML2/PTK2B/STAC2	56
BP	GO:0048024	regulation of mRNA splicing, via spliceosome	17/1445	100/18862	0.00147665	0.0263888	0.0223153	CELF5/ZBTB7A/TRA2A/SNRNP70/YTHDC1/DDX17/SF1/RBM3/DYRK1A/PCBP4/KHDRBS1/FXR1/CELF6/DDX5/TRA2B/SRSF4/RBM15	17
BP	GO:0034250	positive regulation of cellular amide metabolic process	24/1445	163/18862	0.0014886	0.0264055	0.0223294	CLU/RPL5/MAPK3/VIM/RPS4X/EIF3C/RACK1/RPS27L/LARP1/RPL26/EEF2/RPL30/EIF2S3/RBM3/NPM1/ROCK2/SPHK2/NAT10/RPS9/KHDRBS1/HABP4/FXR1/PTK2B/ABCA2	24
BP	GO:0006893	Golgi to plasma membrane transport	12/1445	59/18862	0.00149157	0.0264055	0.0223294	BLZF1/CNST/RAB10/RACK1/OPTN/EXOC6B/RABEP1/NSF/VAMP2/ANK3/RAB26/VAMP5	12
BP	GO:0098930	axonal transport	12/1445	59/18862	0.00149157	0.0264055	0.0223294	DYNC1H1/CALY/SOD1/MAP2/FEZ1/MAPK8IP3/CNIH2/AP3S1/HSPB1/KIF3B/OPA1/NEFL	12
BP	GO:0042987	amyloid precursor protein catabolic process	13/1445	67/18862	0.00152033	0.0268307	0.022689	CLU/APOE/RTN1/PRNP/RTN3/FKBP1A/RTN4/BACE1/LYN/ROCK2/DYRK1A/SORL1/ABCA2	13
BP	GO:1902414	protein localization to cell junction	18/1445	109/18862	0.00153096	0.0269344	0.0227767	ACTB/CLSTN1/SNAP25/NPTN/CACNG3/MAPK8IP3/FERMT2/CNIH2/CPLX1/GRIPAP1/HSPB1/FLNA/BSN/GPHN/RAB11A/HRAS/STX3/NLGN1	18
BP	GO:0033120	positive regulation of RNA splicing	9/1445	37/18862	0.00154569	0.0271094	0.0229246	SLC38A2/TRA2A/SRSF5/SNRNP70/RBM3/DYRK1A/HABP4/POLR2A/TRA2B	9
BP	GO:0002262	myeloid cell homeostasis	22/1445	145/18862	0.00155336	0.0271599	0.0229674	HSPA1B/RPS14/RPS24/ISG15/RPS6/ZBTB7A/SOD1/CDK5RAP3/HSPA9/SLC7A11/B2M/P4HTM/LYN/BAP1/KIT/ADAR/ADD1/KLF2/ALAS1/RPS19/KLF13/ANXA1	22
BP	GO:0071826	ribonucleoprotein complex subunit organization	31/1445	231/18862	0.00160294	0.0279404	0.0236274	RPL38/RPL24/RPL11/RPS14/CELF5/RPL5/HSP90AB1/RPS27/RPSA/RPL23A/RPS10/EIF3C/XRCC5/RPS27L/SRSF5/RPL3/SNRPD3/YTHDC1/SART1/RPL13A/SF1/EIF2S3/RPS28/ADAR/DDX1/CLNS1A/PRPF6/RPS19/CELF6/RPF2/GCFC2	31
BP	GO:0031103	axon regeneration	11/1445	52/18862	0.00166152	0.0286196	0.0242017	PTN/SPP1/GAP43/APOD/RGMA/MAPK8IP3/KLF4/FKBP1B/FLNA/NEFL/MAP2K1	11
BP	GO:0071786	endoplasmic reticulum tubular network organization	6/1445	18/18862	0.00166181	0.0286196	0.0242017	RAB10/RTN3/REEP2/RTN4/ARL6IP1/REEP1	6
BP	GO:0097501	stress response to metal ion	6/1445	18/18862	0.00166181	0.0286196	0.0242017	MT1F/MT3/MT1G/MT2A/MT1H/MT1X	6
BP	GO:0071805	potassium ion transmembrane transport	29/1445	212/18862	0.00166211	0.0286196	0.0242017	SLC1A3/ATP1A3/RGS4/KCNJ10/SNAP25/AQP1/ATP1A2/ATP1B1/KCNB1/ATP1A1/STK39/ATP1B3/KCNK12/ATP1B2/SLC24A3/TMEM175/YWHAE/VAMP2/KCND2/FLNA/FHL1/ANK3/SLC9A1/SLC12A7/KCNIP1/KCNA5/NOS1AP/SLC9A6/KCNH3	29
BP	GO:0090174	organelle membrane fusion	18/1445	110/18862	0.00170227	0.0292222	0.0247114	RAB3A/PRRT2/SNAP25/C2CD5/TMEM175/SYT13/VPS8/CPLX1/TAP1/VAMP2/STX1A/SYT1/VPS41/ANKRD27/STX3/PIP4K2A/SYT4/ANXA1	18
BP	GO:0086001	cardiac muscle cell action potential	14/1445	76/18862	0.00171877	0.0294164	0.0248756	CALM1/GJA1/ATP1A2/ATP1B1/ATP1A1/SNTA1/SCN1A/YWHAE/CALM3/FLNA/CACNA1C/ANK3/KCNA5/NOS1AP	14
BP	GO:0070507	regulation of microtubule cytoskeleton organization	21/1445	137/18862	0.00172423	0.029421	0.0248795	FAM107A/HSPA1B/DYNC1H1/MARK2/MAP6D1/MAP2/RPS3/STMN3/CLIP3/CHMP4B/CHMP5/CYLD/APC2/RAC1/DYRK1A/CDK2AP2/MAPRE1/PSRC1/CLTC/EML2/TPPP	21
BP	GO:2001244	positive regulation of intrinsic apoptotic signaling pathway	12/1445	60/18862	0.00173681	0.0295466	0.0249857	RPL11/SOD1/RPS3/RACK1/UBB/RPL26/PIAS4/RPS7/FIS1/S100A8/DDIT3/BCLAF1	12
BP	GO:0010389	regulation of G2/M transition of mitotic cell cycle	28/1445	203/18862	0.00174735	0.0295484	0.0249872	TUBA1A/PSMA7/PSMC5/PPP2R1A/DYNC1H1/HAUS2/DYNLL1/CDK5RAP3/SKP1/RAD51B/TUBB4B/PCNT/YWHAG/PSMD11/PSMB3/YWHAE/PSMC3/NDE1/FHL1/PSMA1/PSMA6/MAPRE1/RAB11A/PSMD4/PRKAR2B/NAE1/PSMC4/PSMB5	28
BP	GO:0046890	regulation of lipid biosynthetic process	28/1445	203/18862	0.00174735	0.0295484	0.0249872	APOE/ACADVL/SCD/SOD1/FASN/RACK1/ATP1A1/PDK4/FABP5/SCAP/CCDC3/LSS/IL1B/ADIPOR2/SPHK2/FABP3/ASXL3/ABHD6/RAN/HTR2A/PPARGC1A/PDGFA/LDLR/CD74/SC5D/C3/ANXA1/ABCA2	28
BP	GO:0031146	SCF-dependent proteasomal ubiquitin-dependent protein catabolic process	16/1445	93/18862	0.00176699	0.0297032	0.0251181	FBXL22/PSMA7/PSMC5/FBXO2/SKP1/PSMD11/PSMB3/PSMC3/FBXL16/PSMA1/PSMA6/FBXO38/PSMD4/PSMC4/FBXO27/PSMB5	16
BP	GO:0048709	oligodendrocyte differentiation	16/1445	93/18862	0.00176699	0.0297032	0.0251181	PLP1/CLU/PTN/KCNJ10/BNIP3/PTPRZ1/DAAM2/OLIG2/OPALIN/EIF2B4/LYN/SOX10/SOX8/TLR2/TPPP/ABCA2	16
BP	GO:0086009	membrane repolarization	10/1445	45/18862	0.00180537	0.0301694	0.0255123	ATP1A2/ATP1B1/ATP1A1/ATP1B3/ATP1B2/SNTA1/YWHAE/FLNA/KCNA5/NOS1AP	10
BP	GO:1900271	regulation of long-term synaptic potentiation	10/1445	45/18862	0.00180537	0.0301694	0.0255123	FAM107A/PTN/APOE/RELN/NRGN/NPTN/CALB1/SQSTM1/CALB2/ADORA1	10
BP	GO:0098869	cellular oxidant detoxification	17/1445	102/18862	0.00184335	0.0307134	0.0259724	MT3/APOE/HBB/HBD/SOD1/HP/HBA1/HBA2/MGST3/HBQ1/GPX4/GSTK1/MGST1/GPX3/HBG1/NQO1/SOD3	17
BP	GO:0042744	hydrogen peroxide catabolic process	8/1445	31/18862	0.00186306	0.0309263	0.0261524	HBB/HBD/HP/HBA1/HBA2/HBQ1/GPX3/HBG1	8
BP	GO:0042326	negative regulation of phosphorylation	48/1445	407/18862	0.00186704	0.0309263	0.0261524	CAMK2N1/APOE/CALM1/RGS4/PPP2R1A/PRNP/CIT/DUSP3/SIRPA/HDAC4/DYNLL1/CDK5RAP3/SPRED1/DUSP8/RACK1/SH3GL2/DUSP19/DUSP26/YWHAG/MAPK8IP1/UCHL1/PPP2CA/MLLT1/DNAJA1/HSPB1/PARD6A/IL1B/RASIP1/CALM3/LYN/NPM1/DUSP22/SMYD3/ADAR/CALM2/TESC/PRKRIP1/PPARGC1A/DUSP6/DUSP1/PRKAR2B/TESK1/GPS1/PTPRO/PIP4K2A/SORL1/PYDC1/NR2F2	48
BP	GO:1903959	regulation of anion transmembrane transport	18/1445	111/18862	0.00188947	0.0312065	0.0263894	PEA15/RGS4/STXBP4/PRNP/PRKCB/ARL6IP5/ATP1A2/C2CD5/FABP5/CLIP3/PTPN11/IL1B/ADIPOR2/ARL6IP1/CA2/ACSL5/C3/OAZ1	18
BP	GO:0015711	organic anion transport	45/1445	376/18862	0.00190904	0.0314381	0.0265852	SLC1A3/RAB3A/PNPLA8/HBB/TSPOAP1/RGS4/GJA1/CCK/ARL6IP5/KCNJ10/SNAP25/AQP1/SLC47A1/ATP1A2/SLC38A2/HBA1/HBA2/SLC38A1/SLC7A11/SLC25A18/SLC1A2/CPLX1/SLC2A8/IL1B/VAMP2/STX1A/SV2A/SYT1/SFXN5/ARL6IP1/MFSD10/SLC26A4/MPC1/SLC25A29/GLTP/SLC44A4/ADORA1/CA2/SLC6A8/SLC6A12/CPTP/SLC25A6/STRA6/SLC32A1/ANXA1	45
BP	GO:0030522	intracellular receptor signaling pathway	35/1445	274/18862	0.001981	0.0324384	0.0274311	HSPA1B/CNOT2/YWHAH/UBC/UBA52/ZBTB7A/FOXP1/FABP5/NR2F1/UBB/LMO3/PUM1/CYLD/XIAP/CBFB/DNAJA1/NFKBIA/UBE2V1/SAFB2/TADA3/DDX17/FAM120B/SCGB2A2/ZMIZ1/SMARCA4/HEYL/KLF2/GPATCH3/WBP2/PRCP/KDM3A/PIM1/DDX5/CRY2/NR2F2	35
BP	GO:0015837	amine transport	16/1445	94/18862	0.00198123	0.0324384	0.0274311	CHGA/RAB3A/RGS4/CCK/ARL6IP5/ATP1A2/KCNB1/SNCG/SYT13/STX1A/SV2A/SYT1/ARL6IP1/HTR2A/ADORA1/SYT4	16
BP	GO:0031115	negative regulation of microtubule polymerization	5/1445	13/18862	0.00200155	0.0325992	0.0275671	MAP2/CLIP3/DYRK1A/MAPRE1/EML2	5
BP	GO:0030099	myeloid cell differentiation	49/1445	419/18862	0.0020075	0.0325992	0.0275671	MTURN/SCIN/HSPA1B/RPS14/MT1G/SNX10/PRKCB/RBPJ/ISG15/RPS6/ZBTB7A/CDK5RAP3/FASN/FOXP1/HSPA9/GPR137B/GLO1/CBFB/B2M/NFKBIA/MEF2C/GNAS/PTPN11/KAT6A/PITHD1/P4HTM/LYN/TFRC/KIT/ADAR/C1QC/ADD1/TESC/KLF2/ITGA2B/LTF/CSF3/CA2/ALAS1/CEBPB/RPS19/WDR61/CD74/TLR2/PTK2B/PIP4K2A/KLF13/RBM15/TNRC6B	49
BP	GO:0051966	regulation of synaptic transmission, glutamatergic	13/1445	69/18862	0.00200832	0.0325992	0.0275671	RELN/ATP1A2/CACNG3/MEF2C/CDH2/GRM4/SYT1/HTR2A/ADORA1/HOMER1/PTK2B/NLGN1/GRM8	13
BP	GO:0046822	regulation of nucleocytoplasmic transport	17/1445	103/18862	0.00205362	0.0332393	0.0281083	ZIC1/HSP90AB1/APOD/CABP1/YWHAE/PTPN11/SMAD3/BAG3/IL1B/DMAP1/PPP1CC/FLNA/RAN/EMD/KHDRBS1/IFI27/SP100	17
BP	GO:0055076	transition metal ion homeostasis	21/1445	139/18862	0.0020698	0.0333684	0.0282175	MT1F/MT3/FTH1/MT1G/MT2A/MT1H/PRNP/SOD1/SKP1/MT1X/NEDD8/ACO1/SLC30A3/XIAP/B2M/ISCU/TFRC/S100A8/LTF/CYBRD1/NEO1	21
BP	GO:0031647	regulation of protein stability	37/1445	295/18862	0.00207338	0.0333684	0.0282175	FAM107A/MT3/CLU/HSPA1B/RPL11/RPL5/STXBP4/PRNP/HSP90AB1/TRIM44/ATP1B1/MCM8/ATP1B3/GNL3L/ATP1B2/CCT7/GAPDH/RTN4/RPS7/BAG6/VPS35/SWSAP1/CTSA/LSS/SMAD3/VHL/TADA3/BAG3/WFS1/FLNA/TESC/RNF149/PPARGC1A/DDOST/RPL23/PIM1/PFN2	37
BP	GO:0021782	glial cell development	18/1445	112/18862	0.00209371	0.0335625	0.0283816	PLP1/MT3/CLU/VIM/PHGDH/SOD1/KCNJ10/POU3F2/C1QA/EIF2B4/LYN/S100A8/SOX10/LGI4/LDLR/TLR2/TPPP/ABCA2	18
BP	GO:0007612	learning	20/1445	130/18862	0.00209728	0.0335625	0.0283816	PTN/NPTX2/NRGN/CCK/SNAP25/ATP1A2/NPTN/NDRG4/SLC7A11/FYN/GRIN1/KIT/PAK6/NLGN4X/CIC/STRA6/ADCY3/PRKAR2B/NRXN3/TLR2	20
BP	GO:0007029	endoplasmic reticulum organization	15/1445	86/18862	0.00210942	0.0336401	0.0284473	REEP5/RAB10/RTN3/REEP2/SHTN1/RTN4/BAG6/SEC31A/ARL6IP1/LMAN2L/REEP1/ESYT1/EMC4/SMPD4/EMC10	15
BP	GO:0008016	regulation of heart contraction	32/1445	245/18862	0.00211684	0.0336401	0.0284473	CHGA/ATP1A3/CALM1/RGS4/AHCYL1/GJA1/HDAC4/ATP1A2/ATP1B1/ATP1A1/CACNG3/ATP1B3/ATP1B2/SNTA1/GNAO1/S100A1/YWHAE/CALM3/FKBP1B/KCND2/MYH7/CALM2/FLNA/CACNB4/CACNA1C/SLC9A1/KCNIP1/KCNA5/ADORA1/NOS1AP/FXYD1/FXYD7	32
BP	GO:0031330	negative regulation of cellular catabolic process	33/1445	255/18862	0.00211995	0.0336401	0.0284473	MT3/GOLGA2/RPL11/RPL5/HSP90AB1/CST3/SMG1/CDK5RAP3/HP/FEZ1/CHMP4B/RYBP/FEZ2/YBX1/LARP1/SNRNP70/RPS7/TIMP1/BAG6/SLIRP/TAF15/CTSA/N4BP1/PRKCG/RASIP1/NELL1/TIMP2/F8A1/CPTP/RPL23/FURIN/SORL1/FUS	33
BP	GO:1990000	amyloid fibril formation	7/1445	25/18862	0.00214608	0.0339595	0.0287174	CLU/APOE/PFDN5/FKBP1A/B2M/PFDN2/LDLR	7
BP	GO:0070262	peptidyl-serine dephosphorylation	6/1445	19/18862	0.00227283	0.0358651	0.0303288	DUSP26/PPP2R2C/PPP2CA/YWHAE/PPP2R2B/DUSP1	6
BP	GO:0043523	regulation of neuron apoptotic process	27/1445	197/18862	0.00229096	0.0359714	0.0304187	MT3/APOE/PRNP/HSP90AB1/HDAC4/SET/SOD1/KCNB1/FAIM2/PTPRZ1/FYN/CRLF1/MEF2C/PRKCG/BACE1/GRM4/TRIM2/WFS1/MAP3K12/DDIT3/PPARGC1A/NEFL/CEBPB/HRAS/NAE1/NQO1/PTK2B	27
BP	GO:1903539	protein localization to postsynaptic membrane	9/1445	39/18862	0.00229227	0.0359714	0.0304187	CLSTN1/SNAP25/CACNG3/CPLX1/GRIPAP1/GPHN/RAB11A/HRAS/STX3	9
BP	GO:0030518	intracellular steroid hormone receptor signaling pathway	18/1445	113/18862	0.00231616	0.0362101	0.0306205	CNOT2/YWHAH/ZBTB7A/FOXP1/LMO3/CBFB/DNAJA1/SAFB2/TADA3/DDX17/SCGB2A2/ZMIZ1/SMARCA4/HEYL/WBP2/KDM3A/DDX5/CRY2	18
BP	GO:0097237	cellular response to toxic substance	19/1445	122/18862	0.00232026	0.0362101	0.0306205	MT3/APOE/HBB/HBD/SOD1/HP/RDH11/HBA1/HBA2/MGST3/HBQ1/GPX4/GSTK1/MGST1/GPX3/HBG1/NQO1/SOD3/PIM1	19
BP	GO:0045453	bone resorption	12/1445	62/18862	0.00232685	0.0362132	0.0306232	SPP1/SNX10/TPP1/PDK4/GPR137B/S1PR1/RAC1/TFRC/PLEKHM1/CA2/LTBP3/PTK2B	12
BP	GO:0002790	peptide secretion	47/1445	401/18862	0.00234206	0.03635	0.0307389	CHGA/CAMK2N1/RAB3A/APOE/GLUD1/STXBP4/GJA1/PFKL/VSNL1/DYNLL1/SNAP25/RAPGEF4/RAB10/KCNB1/PAM/SNCG/PTPRN/MYH10/RAB15/CPLX1/CANX/PARD6A/PTPN11/NAGPA/IL1B/STX1A/FKBP1B/RSAD2/RAC1/HMGN3/SCG2/S100A8/SNX19/CACNA1C/RASL10B/TM7SF3/KCNA5/ADORA1/BRSK2/SLC25A6/PTPRN2/NNAT/NADK/CD74/APBB3/TLR2/ANXA1	47
BP	GO:0019216	regulation of lipid metabolic process	47/1445	402/18862	0.00246074	0.0380876	0.0322083	APOE/ACADVL/APOD/SCD/SOD1/SERPINA3/EEF1A2/FGFR3/RGL1/BSCL2/FASN/RACK1/ATP1A1/PDK4/FABP5/SCAP/CCDC3/FADS1/LSS/IL1B/NPC2/LYN/KIT/ADIPOR2/SPHK2/FABP3/ASXL3/ABHD6/RAN/HTR2A/PPARGC1A/ADORA1/ALAS1/PLIN2/PDGFA/LDLR/CD74/PDGFRB/SC5D/STOML2/PTK2B/PIP4K2A/SORL1/ID2/C3/ANXA1/ABCA2	47
BP	GO:0032091	negative regulation of protein binding	16/1445	96/18862	0.00247513	0.0382061	0.0323084	ACTB/GOLGA2/MAPK3/SLPI/TMBIM6/MAP2/RACK1/GNL3L/B2M/CRMP1/CTSZ/PEX14/GTF2F1/IFIT2/SORL1/DDX11	16
BP	GO:0031397	negative regulation of protein ubiquitination	14/1445	79/18862	0.00251056	0.0386477	0.0326819	HSPA1B/RPL11/RPL5/ISG15/TRIM44/RPS3/GNL3L/FYN/RPS7/DNAJA1/N4BP1/PRKCG/SQSTM1/RPL23	14
BP	GO:0051056	regulation of small GTPase mediated signal transduction	39/1445	319/18862	0.00253603	0.0388626	0.0328636	APOE/CHN1/RELN/SYDE2/GDI1/STMN3/RAP1GAP/CYTH1/ADGRG1/SIPA1L1/SRGAP3/ALS2/ARHGAP1/GARNL3/CHN2/PSD2/RHOT2/FAM13B/RASAL1/DENND4C/RASIP1/DENND3/LYN/ARHGEF12/RAC1/MFN2/NET1/PLCE1/AUTS2/SQSTM1/RHOG/TIMP2/RASA3/TRIP10/ARHGAP33/HRAS/ARHGAP21/PDGFRB/PSD3	39
BP	GO:0071695	anatomical structure maturation	29/1445	218/18862	0.00253824	0.0388626	0.0328636	SNX10/RERE/RBPJ/ZBTB7A/FGFR3/MTCH1/NRCAM/DMC1/CBFB/S1PR1/C1QA/LHX6/KLF2/LTF/SOX10/DDIT3/SOX18/DLD/OPA1/LGI4/TMEM79/SOX8/LYL1/ACTL6B/ATP6AP2/CEND1/PTK2B/AKR1B1/C3	29
BP	GO:0008089	anterograde axonal transport	10/1445	47/18862	0.00254821	0.03891	0.0329037	CALY/SOD1/MAP2/FEZ1/MAPK8IP3/CNIH2/AP3S1/HSPB1/KIF3B/NEFL	10
BP	GO:0003015	heart process	36/1445	289/18862	0.00265333	0.0402402	0.0340286	CHGA/ATP1A3/CALM1/RGS4/AHCYL1/GJA1/HDAC4/GNAI2/SOD1/ATP1A2/ATP1B1/ATP1A1/CACNG3/ATP1B3/ATP1B2/SNTA1/FYN/SCN1A/GNAO1/S100A1/YWHAE/CALM3/FKBP1B/KCND2/MYH7/CALM2/FLNA/CACNB4/CACNA1C/SLC9A1/KCNIP1/KCNA5/ADORA1/NOS1AP/FXYD1/FXYD7	36
BP	GO:0051452	intracellular pH reduction	11/1445	55/18862	0.00266476	0.0402402	0.0340286	ATP6V0C/ATP6V1B2/ATP6V1E1/ATP6V0A1/TMEM9/ATP6V1D/ATP6V0B/CLIC4/ATP6V1H/CA2/ATP6AP2	11
BP	GO:1902991	regulation of amyloid precursor protein catabolic process	11/1445	55/18862	0.00266476	0.0402402	0.0340286	CLU/APOE/RTN1/PRNP/RTN3/FKBP1A/RTN4/LYN/ROCK2/SORL1/ABCA2	11
BP	GO:0006081	cellular aldehyde metabolic process	12/1445	63/18862	0.00267795	0.0402402	0.0340286	CYP1B1/RDH11/TKT/GLO1/TPI1/ALDH4A1/HYI/HOGA1/AKR7A2/ALDH1A3/KDM3A/TALDO1	12
BP	GO:0017156	calcium-ion regulated exocytosis	12/1445	63/18862	0.00267795	0.0402402	0.0340286	SCIN/RAB3A/GNAI2/RAPGEF4/KCNB1/SYT13/VAMP2/STX1A/SYT1/CADPS2/SYT4/DOC2A	12
BP	GO:1902475	L-alpha-amino acid transmembrane transport	12/1445	63/18862	0.00267795	0.0402402	0.0340286	SLC1A3/RGS4/ARL6IP5/KCNJ10/SLC47A1/ATP1A2/SLC38A1/SLC7A11/SLC25A18/SLC1A2/ARL6IP1/SLC25A29	12
BP	GO:1902749	regulation of cell cycle G2/M phase transition	29/1445	219/18862	0.0027172	0.0407221	0.034436	TUBA1A/PSMA7/PSMC5/PPP2R1A/DYNC1H1/HAUS2/DYNLL1/CDK5RAP3/SKP1/RAD51B/TUBB4B/PCNT/YWHAG/PSMD11/PSMB3/YWHAE/PSMC3/NPM1/NDE1/FHL1/PSMA1/PSMA6/MAPRE1/RAB11A/PSMD4/PRKAR2B/NAE1/PSMC4/PSMB5	29
BP	GO:0048520	positive regulation of behavior	7/1445	26/18862	0.00274505	0.0409229	0.0346058	GJA1/CCK/HDAC4/SGIP1/MEF2C/STRA6/NLGN1	7
BP	GO:0050434	positive regulation of viral transcription	7/1445	26/18862	0.00274505	0.0409229	0.0346058	POLR2I/POLR2F/NELFCD/POLR2L/GTF2F1/POLR2J/POLR2A	7
BP	GO:0120162	positive regulation of cold-induced thermogenesis	16/1445	97/18862	0.00275805	0.0410088	0.0346785	DYNC1H1/GJA1/SCD/LPIN1/BSCL2/FABP5/IL18/IL4R/GNAS/GADD45G/MFN2/ADIPOR2/PPARGC1A/CEBPB/KDM3A/DECR1	16
BP	GO:0006520	cellular amino acid metabolic process	40/1445	331/18862	0.00277627	0.0411716	0.0348162	GLUD1/PSMA7/PSMC5/DDAH1/CSAD/PHGDH/PSAT1/GPT2/GCSH/ATCAY/IDO2/GAD2/SLC7A11/PSMD11/PSMB3/FN3K/QDPR/PSMC3/ALDH4A1/VARS2/ALDH5A1/PPA1/GLUD2/PSMA1/PSMA6/HOGA1/DLD/OGDH/GLUL/MPST/PSMD4/PSMC4/PCBD1/NQO1/BCKDK/CARS2/HSD17B10/PSMB5/OAZ1/GAD1	40
BP	GO:0016236	macroautophagy	38/1445	311/18862	0.00288478	0.0426691	0.0360826	ATP6V0C/ATP6V1B2/MAPK3/ATP6V1E1/ATP6V0A1/SMG1/ATP6V1D/DYNLL1/ATG10/RRAGC/FEZ1/BNIP3/CHMP4B/FEZ2/OPTN/LARP1/ATP6V0B/GAPDH/CAPN1/UCHL1/DCN/RRAGD/HSPB8/VPS26A/VPS35/BAG3/GABARAPL1/UBQLN2/MFN2/VPS41/SQSTM1/FYCO1/ATP6V1H/ATG101/SCOC/KLHL3/TECPR1/PIP4K2A	38
BP	GO:0010649	regulation of cell communication by electrical coupling	5/1445	14/18862	0.00291854	0.0427407	0.0361431	CALM1/GJA1/CALM3/CALM2/ANK3	5
BP	GO:0060049	regulation of protein glycosylation	5/1445	14/18862	0.00291854	0.0427407	0.0361431	MT3/GOLGA2/RAMP1/TMEM59/ABCA2	5
BP	GO:1900037	regulation of cellular response to hypoxia	5/1445	14/18862	0.00291854	0.0427407	0.0361431	DDAH1/TMBIM6/CHCHD2/ENO1/ROCK2	5
BP	GO:0043406	positive regulation of MAP kinase activity	30/1445	230/18862	0.0029198	0.0427407	0.0361431	PEA15/MAPK3/UBC/UBA52/SOD1/RPS3/DUSP19/STK39/UBB/MAPK8IP3/UBE2V1/PTPN11/IL1B/GADD45G/GRM4/IGFBP6/KIT/MAP4K2/PLCE1/MAP3K5/MAP3K12/HTR2A/DUSP6/PDGFA/HRAS/CD74/PDGFRB/PDE6H/PTK2B/MAP2K1	30
BP	GO:0042273	ribosomal large subunit biogenesis	13/1445	72/18862	0.00297611	0.0434528	0.0367452	RPL38/RPL24/RPL11/RPL5/RPL35/RPL23A/RPL26/RPL3/RPL10A/NPM1/NSA2/SNU13/RPF2	13
BP	GO:0070839	metal ion export	10/1445	48/18862	0.00300187	0.0437162	0.036968	ATP1A3/ATP1A2/ATP1B1/ATP1A1/ATP1B3/ATP1B2/YWHAE/SLC9A1/KCNA5/FXYD1	10
BP	GO:0061025	membrane fusion	24/1445	172/18862	0.00307838	0.0447154	0.0378129	RAB3A/PRRT2/SNAP25/C2CD5/RABEP1/TMEM175/SYT13/VPS8/CPLX1/TAP1/NSF/GCA/VAMP2/STX1A/SYT1/USE1/VPS41/ANKRD27/OPA1/CTSL/STX3/PIP4K2A/SYT4/ANXA1	24
BP	GO:0042743	hydrogen peroxide metabolic process	11/1445	56/18862	0.0030911	0.0447854	0.0378721	HBB/HBD/SOD1/HP/HBA1/HBA2/FYN/HBQ1/RAC1/GPX3/HBG1	11
BP	GO:0009743	response to carbohydrate	29/1445	221/18862	0.00310756	0.044909	0.0379766	SPARC/CAMK2N1/STXBP4/GJA1/PFKL/PRKCB/VSNL1/DYNLL1/RACK1/KCNB1/PTPRN/EIF2B4/LYN/VAMP2/FKBP1B/RAC1/HMGN3/COL6A2/ADIPOR2/SMARCA4/PPARGC1A/OPA1/LDHA/BRSK2/PTPRN2/NADK/NQO1/TRA2B/PTK2B	29
BP	GO:0043462	regulation of ATPase activity	14/1445	81/18862	0.00318911	0.0457375	0.0386772	RAB3A/MSH3/DYNLL1/ATP1B1/DNAJA2/ATP1B3/ATP1B2/SNRNP70/DNAJA1/DNAL4/LTF/BRSK2/DNAJB1/PFN2	14
BP	GO:0099601	regulation of neurotransmitter receptor activity	14/1445	81/18862	0.00318911	0.0457375	0.0386772	RELN/NPTX2/GRIA2/CACNG3/CAPN1/CNIH2/GRIN1/DLGAP2/MEF2C/PPARGC1A/NEFL/HOMER1/PTK2B/NLGN1	14
BP	GO:1903533	regulation of protein targeting	14/1445	81/18862	0.00318911	0.0457375	0.0386772	PRNP/GDI1/KCNB1/CEMIP/C2CD5/STOM/FYN/BAG3/UBL5/FIS1/BAP1/ANK3/HRAS/HPCA	14
BP	GO:0010498	proteasomal protein catabolic process	54/1445	483/18862	0.00326118	0.046653	0.0394514	CLU/APOE/FBXL22/HSPA1B/RPL11/SPOP/PSMA7/PSMC5/ENC1/HSP90AB1/UBC/UBA52/FBXO2/SKP1/RACK1/ZYG11B/RYBP/UBB/UCHL1/UBE4A/PSMD11/PSMB3/SDF2L1/BAG6/N4BP1/PITHD1/PRKCG/PSMC3/KLHL42/FBXL16/UBQLN2/FOXRED2/TRIM2/WFS1/PSMA1/PSMA6/F8A1/RNF40/CRBN/NUB1/ARMC8/DDIT3/FBXO38/ANKZF1/BRSK2/UBE2J1/IFI27/PSMD4/LTN1/PSMC4/FBXO27/RNF175/PSMB5/ERLEC1	54
BP	GO:0051602	response to electrical stimulus	9/1445	41/18862	0.00330017	0.0470176	0.0397597	RAB3A/EEF1A2/S100A13/FZD3/SLC9A1/PPARGC1A/OPA1/NQO1/HPCA	9
BP	GO:0030178	negative regulation of Wnt signaling pathway	28/1445	212/18862	0.00330326	0.0470176	0.0397597	APOE/PSMA7/PSMC5/APCDD1/VGLL4/RACK1/PFDN5/PSMD11/CYLD/PSMB3/AMER2/IGFBP4/CDH2/APC2/PSMC3/IGFBP6/CXXC4/PSMA1/PSMA6/SOX10/DDIT3/EMD/PSMD4/PSMC4/PTPRO/PSMB5/FRZB/MESP1	28
BP	GO:0048588	developmental cell growth	29/1445	222/18862	0.00331998	0.047137	0.0398607	MT3/APOE/LLPH/SPP1/PDLIM5/RGS4/DIP2B/HSP90AB1/GDI1/MAP2/COBL/SH3GL2/NRCAM/SHTN1/RTN4/OLFM1/DCLK1/RASAL1/CPNE6/SYT1/ULK2/PAK6/AUTS2/FLRT3/NDN/DSCAM/RAB11A/SLC9A6/SYT4	29
BP	GO:0015849	organic acid transport	39/1445	324/18862	0.0033315	0.0471824	0.0398991	SLC1A3/RAB3A/APOE/PNPLA8/TSPOAP1/RGS4/GJA1/CCK/ARL6IP5/KCNJ10/SNAP25/SLC47A1/ATP1A2/SLC38A2/FABP5/SLC38A1/SLC7A11/SLC25A18/SLC1A2/CPLX1/IL1B/VAMP2/STX1A/FIS1/SV2A/SYT1/SFXN5/ARL6IP1/FABP3/SLC26A4/MPC1/SLC25A29/ADORA1/ACSL5/SLC6A12/PLIN2/STRA6/SLC32A1/ANXA1	39
BP	GO:0000187	activation of MAPK activity	22/1445	154/18862	0.00335239	0.0473598	0.0400491	PEA15/MAPK3/UBC/UBA52/SOD1/STK39/UBB/MAPK8IP3/UBE2V1/PTPN11/IL1B/GRM4/IGFBP6/KIT/MAP4K2/PLCE1/MAP3K5/MAP3K12/DUSP6/CD74/PDE6H/MAP2K1	22
BP	GO:0002474	antigen processing and presentation of peptide antigen via MHC class I	16/1445	99/18862	0.00340448	0.047857	0.0404696	PSMA7/PSMC5/PSMD11/PSMB3/B2M/ERAP2/CANX/SEC31A/TAP1/PSMC3/PSMA1/PSMA6/ITGB5/PSMD4/PSMC4/PSMB5	16
BP	GO:0019886	antigen processing and presentation of exogenous peptide antigen via MHC class II	16/1445	99/18862	0.00340448	0.047857	0.0404696	DYNC1H1/DYNLL1/SH3GL2/HLA-DPB1/DYNC1LI2/AP2B1/AP2S1/CANX/SEC31A/KIF3B/DYNC1I1/CLTC/CTSL/KIFAP3/CD74/KLC2	16
BP	GO:0006816	calcium ion transport	47/1445	409/18862	0.00344737	0.0481006	0.0406756	PLP1/CAMK2A/GPM6A/CALM1/RGS4/TPT1/PRNP/TMBIM6/GJA1/RAMP1/NCS1/PRKCB/GNAI2/ATP1A2/ATP1B1/SARAF/CEMIP/APLNR/CACNG3/FKBP1A/SLC24A3/FYN/GRIN1/GNAO1/YWHAE/CALM3/LYN/FKBP1B/SPHK2/WFS1/CALM2/CACNB4/CACNA1C/SLC9A1/HTR2A/TMCO1/DDIT3/ERO1A/RASA3/OPA1/NOS1AP/HOMER1/PDGFRB/HPCA/STOML2/PTK2B/STAC2	47
BP	GO:0044272	sulfur compound biosynthetic process	26/1445	193/18862	0.00346352	0.0481006	0.0406756	CSAD/SCD/HSD17B12/FASN/PDK4/ACSS1/PDHB/SLC7A11/DCN/MGST3/BGN/BCAN/OGN/PRELP/MAT2A/GSTK1/MGST1/PAPSS1/ST3GAL3/ELOVL4/ACSL5/DLD/MPST/CHST3/CBR4/CHST15	26
BP	GO:1901654	response to ketone	26/1445	193/18862	0.00346352	0.0481006	0.0406756	PTN/SPP1/CALM1/ELK1/FOSB/AQP1/KLF9/LARP1/KLF4/CALM3/FOXO1/SMYD3/ROCK2/SPHK2/KLF2/SOX10/SGK1/DUSP1/OPA1/NEFL/ADCY3/WBP2/NQO1/HPCA/TLR2/AKR1B1	26
BP	GO:0009065	glutamine family amino acid catabolic process	7/1445	27/18862	0.00346426	0.0481006	0.0406756	GLUD1/DDAH1/GAD2/ALDH4A1/GLUD2/GLUL/GAD1	7
BP	GO:0090140	regulation of mitochondrial fission	7/1445	27/18862	0.00346426	0.0481006	0.0406756	INF2/STAT2/BNIP3/DCN/VPS35/FIS1/PPARGC1A	7
BP	GO:1903169	regulation of calcium ion transmembrane transport	21/1445	145/18862	0.0034771	0.0481608	0.0407265	PLP1/CALM1/PRNP/ATP1A2/ATP1B1/CEMIP/APLNR/FKBP1A/FYN/YWHAE/CALM3/LYN/FKBP1B/CALM2/CACNB4/CACNA1C/SLC9A1/NOS1AP/HPCA/PTK2B/STAC2	21
BP	GO:0010257	NADH dehydrogenase complex assembly	12/1445	65/18862	0.00350922	0.0481708	0.0407349	NDUFC2/NDUFA5/NDUFB4/NDUFV1/NDUFA10/NDUFB5/NDUFS8/NDUFS7/NDUFB8/NDUFB10/NDUFS5/NDUFB7	12
BP	GO:0032981	mitochondrial respiratory chain complex I assembly	12/1445	65/18862	0.00350922	0.0481708	0.0407349	NDUFC2/NDUFA5/NDUFB4/NDUFV1/NDUFA10/NDUFB5/NDUFS8/NDUFS7/NDUFB8/NDUFB10/NDUFS5/NDUFB7	12
BP	GO:0071375	cellular response to peptide hormone stimulus	39/1445	325/18862	0.00351398	0.0481708	0.0407349	CAMK2A/ATP6V0C/SYAP1/ATP6V1B2/NUCKS1/STXBP4/AHCYL1/ATP6V1E1/ATP6V0A1/PRKCB/GNAI2/ATP6V1D/LPIN1/RAB10/C2CD5/PDK4/RAB15/SRSF5/ATP6V0B/YWHAG/AP3S1/FYN/SLC2A8/PTPN11/IL1B/DENND4C/LYN/FOXO1/VAMP2/ROCK2/ATP6V1H/SLC9A1/CA2/PHIP/OPA1/ADCY3/PRKAR2B/PIP4K2A/SORL1	39
BP	GO:0009306	protein secretion	43/1445	367/18862	0.00352217	0.0481708	0.0407349	CHGA/CAMK2N1/RAB3A/APOE/GLUD1/STXBP4/GJA1/PFKL/VSNL1/DYNLL1/SNAP25/RAPGEF4/RAB10/KCNB1/PAM/SNCG/PTPRN/MYH10/RAB15/CPLX1/CANX/PARD6A/PTPN11/NAGPA/IL1B/STX1A/FKBP1B/RSAD2/RAC1/HMGN3/SCG2/SNX19/CACNA1C/TM7SF3/KCNA5/BRSK2/SLC25A6/PTPRN2/NNAT/NADK/APBB3/TLR2/ANXA1	43
BP	GO:0046395	carboxylic acid catabolic process	31/1445	243/18862	0.00353063	0.0481708	0.0407349	GLUD1/CYP4F3/DDAH1/ACADVL/CSAD/CRABP1/LPIN1/GPT2/GCSH/IDO2/GAD2/QDPR/GNPDA1/ECHS1/ALDH4A1/ALDH5A1/GLUD2/ETFDH/HOGA1/ACAD11/DLD/OGDH/GLUL/PCBD1/PHYH/BCKDK/HSD17B10/CPT1C/ACAT2/DECR1/GAD1	31
BP	GO:0051258	protein polymerization	36/1445	294/18862	0.00353197	0.0481708	0.0407349	FAM107A/SCIN/GOLGA2/HSPA1B/ARPC3/ADD3/CDC42EP4/TUBGCP4/MAP2/RPS3/COBL/CLIP3/CHMP4B/VASP/EVL/ARPC5L/GPX4/SPTAN1/RAC1/NDE1/ADD1/CSF3/TMSB15B/VDAC2/DYRK1A/MAPRE1/PSRC1/OPA1/NEFL/EML2/ARPC1B/COTL1/TPPP/PTK2B/PFN2/AIF1	36
BP	GO:0006457	protein folding	30/1445	233/18862	0.00354337	0.0481708	0.0407349	CLU/HSPA1B/HSP90AB1/PPIAL4A/GNAI2/DNAJA2/HSPA6/TBCA/PFDN5/HSPA9/FKBP1A/CCT7/SNRNP70/SDF2L1/DNAJA1/B2M/GNAO1/CANX/PFDN2/HSPB1/GANAB/BAG3/FKBP1B/WFS1/LMAN2L/ERO1A/MLEC/TBCE/CD74/DNAJB1	30
BP	GO:0051656	establishment of organelle localization	49/1445	431/18862	0.00354584	0.0481708	0.0407349	CHGA/RAB3A/GOLGA2/NEFH/PTGDS/DYNC1H1/GJA1/MAP2/S100A13/FEZ1/CHMP4B/UBB/IL4R/CNIH2/AP3S1/CHMP5/RHOT2/SEC31A/TRAPPC2L/NSF/LYN/KIF3B/DYNC1I1/KIT/NPM1/NDE1/SPHK2/MAP4K2/FYCO1/CTSZ/RAN/F8A1/PEX14/CD59/PSRC1/PEF1/OPA1/NEFL/RAB11A/TANC2/ARHGAP21/TESK1/KIFAP3/TRAPPC6B/SAR1A/NLGN1/TRAPPC1/SYT4/IL13RA2	49
BP	GO:0000381	regulation of alternative mRNA splicing, via spliceosome	11/1445	57/18862	0.00357055	0.0482748	0.0408229	CELF5/ZBTB7A/YTHDC1/DDX17/DYRK1A/KHDRBS1/FXR1/CELF6/DDX5/TRA2B/RBM15	11
BP	GO:0034205	amyloid-beta formation	11/1445	57/18862	0.00357055	0.0482748	0.0408229	CLU/APOE/RTN1/PRNP/RTN3/RTN4/BACE1/ROCK2/DYRK1A/SORL1/ABCA2	11
BP	GO:0035592	establishment of protein localization to extracellular region	43/1445	368/18862	0.00370119	0.049922	0.0422158	CHGA/CAMK2N1/RAB3A/APOE/GLUD1/STXBP4/GJA1/PFKL/VSNL1/DYNLL1/SNAP25/RAPGEF4/RAB10/KCNB1/PAM/SNCG/PTPRN/MYH10/RAB15/CPLX1/CANX/PARD6A/PTPN11/NAGPA/IL1B/STX1A/FKBP1B/RSAD2/RAC1/HMGN3/SCG2/SNX19/CACNA1C/TM7SF3/KCNA5/BRSK2/SLC25A6/PTPRN2/NNAT/NADK/APBB3/TLR2/ANXA1	43
BP	GO:0062197	cellular response to chemical stress	41/1445	347/18862	0.00371558	0.049997	0.0422793	MT3/HSPA1B/MAPK3/SIRPA/PLEKHA1/GPR37/ZNF580/CYP1B1/ARL6IP5/SOD1/RPS3/AQP1/CHCHD2/XRCC5/RACK1/SCN2A/BNIP3/STK39/SLC7A11/FYN/EFHD1/DNAJA1/HSPB1/KLF4/FOXO1/MGST1/CAMKK2/NET1/GPX3/MAP3K5/KLF2/ERMP1/DDIT3/PPARGC1A/ERO1A/ANKZF1/NQO1/SOD3/AIF1/AKR1B1/ANXA1	41
CC	GO:0022626	cytosolic ribosome	55/1488	107/19520	3.11432e-33	2.03988e-30	1.39653e-30	RPL31/RPL38/RPL19/RPL4/RPL24/RPL11/RPS14/RPS26/RPL5/RPL35/RPL41/RPS24/RPS25/RPL18A/RPS4Y1/ISG15/RPL37A/RPL18/APOD/RPS4X/UBA52/RPS27/RPSA/RPL23A/RPS6/RPLP1/RPS10/RPS3/RPS23/RPS21/RPS3A/RPS27L/RPS20/HBA1/HBA2/RPLP2/RPL27/RPS8/RPL26/RPS7/RPL3/RPL21/RPL36/RPL10A/RPL13A/RPL9/RPL30/RPS28/RPL27A/RPS18/PPARGC1A/RPS9/RPL17/RPS19/RPL23	55
CC	GO:0044391	ribosomal subunit	65/1488	187/19520	1.10942e-26	3.63336e-24	2.48744e-24	RPL31/RPL38/RPL19/RPL4/RPL24/RPL11/RPS14/RPS26/RPL5/RPL35/RPL41/RPS24/RPS25/RPL18A/RPS4Y1/ISG15/RPL37A/RPL18/RPS4X/UBA52/RPS27/RPSA/RPL23A/RPS6/RPLP1/RPS10/RPS3/RPS23/RPS21/RACK1/RPS3A/RPS27L/MRPL24/RPS20/HBA1/HBA2/RPLP2/RPL27/RPS8/RPL26/MRPL57/RPS7/RPL3/RPL21/RPL36/RPL10A/MRPL16/RPL13A/RPL9/RPL30/RBM3/MRPL17/RPS28/RPL27A/MRPS6/MRPL41/MRPS36/RPS18/MRPL37/RPS9/RPL17/RPS19/RPL23/MRPS33/MRPL45	65
CC	GO:0005840	ribosome	73/1488	243/19520	2.55536e-25	5.57921e-23	3.8196e-23	RPL31/RPL38/RPL19/RPL4/RPL24/RPL11/RPS14/RPS26/RPL5/RPL35/RPL41/RPS24/RPS25/RPL18A/RPS4Y1/ISG15/RPL37A/RPL18/APOD/RPS4X/UBA52/RPS27/RPSA/RPL23A/RPS6/RPLP1/RPS10/RPS3/RPS23/RPS21/RACK1/RPS3A/RPS27L/MRPL24/RPS20/HBA1/HBA2/RPLP2/RPL27/LARP1/RPS8/RPL26/MRPL57/EEF2/RPS7/RPL3/RPL21/RPL36/RPL10A/MRPL16/MRPS23/RPL13A/RPL9/RPL30/SF1/RBM3/MRPL17/RPS28/RPL27A/MRPS6/MRPL41/NUFIP2/MRPS36/RPS6KL1/RPS18/PPARGC1…	73
CC	GO:0022627	cytosolic small ribosomal subunit	26/1488	46/19520	8.81361e-18	1.44323e-15	9.88052e-16	RPS14/RPS26/RPS24/RPS25/RPS4Y1/ISG15/RPS4X/UBA52/RPS27/RPSA/RPS6/RPS10/RPS3/RPS23/RPS21/RPS3A/RPS27L/RPS20/HBA1/HBA2/RPS8/RPS7/RPS28/RPS18/RPS9/RPS19	26
CC	GO:0005844	polysome	30/1488	68/19520	2.28311e-16	2.99087e-14	2.04759e-14	RPL31/RPL38/RPL19/RPL24/RPL11/RPS26/RPL41/RPL18A/RPS4Y1/VIM/RPL18/RPS4X/RPS6/RPS3/RPS23/RPS21/MYH10/LARP1/EEF2/MSI1/RPL36/RPL10A/NAA38/ATXN2/RPL30/RPS28/PSMA1/PSMA6/NUFIP2/FXR1	30
CC	GO:0022625	cytosolic large ribosomal subunit	27/1488	57/19520	7.809e-16	8.52482e-14	5.8362e-14	RPL31/RPL38/RPL19/RPL4/RPL24/RPL11/RPL5/RPL35/RPL41/RPL18A/RPL37A/RPL18/RPL23A/RPLP1/RPLP2/RPL27/RPL26/RPL3/RPL21/RPL36/RPL10A/RPL13A/RPL9/RPL30/RPL27A/RPL17/RPL23	27
CC	GO:0015935	small ribosomal subunit	30/1488	74/19520	3.81989e-15	3.57433e-13	2.44703e-13	RPS14/RPS26/RPS24/RPS25/RPS4Y1/ISG15/RPS4X/UBA52/RPS27/RPSA/RPS6/RPS10/RPS3/RPS23/RPS21/RACK1/RPS3A/RPS27L/RPS20/HBA1/HBA2/RPS8/RPS7/RPS28/MRPS6/MRPS36/RPS18/RPS9/RPS19/MRPS33	30
CC	GO:0005925	focal adhesion	80/1488	416/19520	8.78518e-15	7.19287e-13	4.92432e-13	RPL31/CSRP1/FAM107A/RPL38/ACTB/RPL19/ATP6V0C/RPL4/HSPA1B/RPS14/RPL5/MAPK3/ARPC3/GJA1/VIM/RPL37A/RPL18/RPS4X/RPLP1/RPS10/RPS3/FGFR3/RAB10/RPS3A/RPLP2/RPL27/ILK/RPS8/HSPA9/YWHAG/FERMT2/CAPN1/VASP/RPS7/RPL3/EVL/B2M/RPL10A/ARPC5L/YWHAE/HSPB1/CDH2/RPL13A/RPL9/RPL30/RAC1/SCARB2/NPM1/PPP1CC/MPRIP/FLNA/CAP1/FHL1/RHOG/ADD1/LAYN/SLC9A1/TRIP6/ITGA2B/ITGB5/CD59/RPS18/TNS3/MAPRE1/FLRT3/RPS9/CLTC/PALLD/ANXA5/R…	80
CC	GO:0098984	neuron to neuron synapse	70/1488	342/19520	1.74067e-14	1.26682e-12	8.6728e-13	CAMK2A/CAMK2N1/RPL38/ATP1A3/PJA2/RPS14/PDLIM5/NEFH/PRRT2/GAP43/ADD3/PRNP/RPS25/NCS1/BAALC/NRGN/RPS27/CLSTN1/RPS3/RAPGEF4/BCAS1/GRIA2/SH3GL2/ATP1A1/BNIP3/NPTN/FABP5/CACNG3/SPOCK1/ATP1B2/CABP1/SIPA1L1/RTN4/CNIH2/FYN/SLC30A3/GRIN1/DLGAP2/DCLK1/CAP2/CDH2/PRKCG/NSF/RUSC1/BACE1/RPL30/LYN/CALB1/STX1A/SYT1/KCND2/SH2D5/ADD1/CACNA1C/RPS18/MPP2/ADORA1/NLGN4X/BSN/LRFN3/FXR1/GPHN/RPS19/RPL23/HOMER1/DNAJB1/PTK…	70
CC	GO:0030055	cell-substrate junction	80/1488	423/19520	2.27955e-14	1.49311e-12	1.0222e-12	RPL31/CSRP1/FAM107A/RPL38/ACTB/RPL19/ATP6V0C/RPL4/HSPA1B/RPS14/RPL5/MAPK3/ARPC3/GJA1/VIM/RPL37A/RPL18/RPS4X/RPLP1/RPS10/RPS3/FGFR3/RAB10/RPS3A/RPLP2/RPL27/ILK/RPS8/HSPA9/YWHAG/FERMT2/CAPN1/VASP/RPS7/RPL3/EVL/B2M/RPL10A/ARPC5L/YWHAE/HSPB1/CDH2/RPL13A/RPL9/RPL30/RAC1/SCARB2/NPM1/PPP1CC/MPRIP/FLNA/CAP1/FHL1/RHOG/ADD1/LAYN/SLC9A1/TRIP6/ITGA2B/ITGB5/CD59/RPS18/TNS3/MAPRE1/FLRT3/RPS9/CLTC/PALLD/ANXA5/R…	80
CC	GO:0015934	large ribosomal subunit	35/1488	115/19520	4.97514e-13	2.96247e-11	2.02814e-11	RPL31/RPL38/RPL19/RPL4/RPL24/RPL11/RPL5/RPL35/RPL41/RPL18A/RPL37A/RPL18/RPL23A/RPLP1/MRPL24/RPLP2/RPL27/RPL26/MRPL57/RPL3/RPL21/RPL36/RPL10A/MRPL16/RPL13A/RPL9/RPL30/RBM3/MRPL17/RPL27A/MRPL41/MRPL37/RPL17/RPL23/MRPL45	35
CC	GO:0042788	polysomal ribosome	18/1488	32/19520	1.14887e-12	6.27092e-11	4.29315e-11	RPL31/RPL38/RPL19/RPL24/RPL11/RPS26/RPL41/RPL18A/RPL18/RPS23/RPS21/LARP1/EEF2/RPL36/RPL10A/RPL30/RPS28/NUFIP2	18
CC	GO:0014069	postsynaptic density	62/1488	313/19520	2.49976e-12	1.25949e-10	8.62264e-11	CAMK2A/CAMK2N1/RPL38/PJA2/RPS14/PDLIM5/NEFH/PRRT2/GAP43/ADD3/PRNP/RPS25/NCS1/BAALC/NRGN/RPS27/CLSTN1/RPS3/BCAS1/GRIA2/ATP1A1/BNIP3/NPTN/FABP5/CACNG3/SPOCK1/CABP1/SIPA1L1/RTN4/CNIH2/FYN/GRIN1/DLGAP2/DCLK1/CAP2/CDH2/PRKCG/NSF/RUSC1/RPL30/LYN/STX1A/KCND2/SH2D5/ADD1/CACNA1C/RPS18/MPP2/ADORA1/NLGN4X/BSN/LRFN3/FXR1/GPHN/RPS19/RPL23/HOMER1/DNAJB1/PTK2B/NLGN1/CNKSR2/PSD3	62
CC	GO:0098978	glutamatergic synapse	61/1488	308/19520	3.78419e-12	1.77046e-10	1.21208e-10	SPARC/ACTB/GPM6A/APOE/TSPOAP1/CALY/SPARCL1/NCS1/NPTX2/NRGN/RPS27/CLSTN1/SNAP25/SLITRK4/SH3GL2/SCN2A/NPTN/CACNG3/AP2B1/CNIH2/FYN/CPLX1/GRIPAP1/SLC30A3/SLITRK2/DLGAP2/PSD2/ARPC5L/YWHAE/BCAN/LYN/CALB1/STX1A/SV2A/RAC1/SYT1/PPP1CC/KCND2/FLNA/ABHD6/HTR2A/NLGN4X/FLRT3/BSN/LRFN3/FXR1/NOS1AP/RAB11A/HRAS/PRKAR2B/HOMER1/DNAJB1/PLCB1/STX3/HPCA/PTPRO/PTK2B/NLGN1/CNKSR2/CPT1C/CADPS2	61
CC	GO:0032279	asymmetric synapse	62/1488	318/19520	5.11303e-12	2.23269e-10	1.52853e-10	CAMK2A/CAMK2N1/RPL38/PJA2/RPS14/PDLIM5/NEFH/PRRT2/GAP43/ADD3/PRNP/RPS25/NCS1/BAALC/NRGN/RPS27/CLSTN1/RPS3/BCAS1/GRIA2/ATP1A1/BNIP3/NPTN/FABP5/CACNG3/SPOCK1/CABP1/SIPA1L1/RTN4/CNIH2/FYN/GRIN1/DLGAP2/DCLK1/CAP2/CDH2/PRKCG/NSF/RUSC1/RPL30/LYN/STX1A/KCND2/SH2D5/ADD1/CACNA1C/RPS18/MPP2/ADORA1/NLGN4X/BSN/LRFN3/FXR1/GPHN/RPS19/RPL23/HOMER1/DNAJB1/PTK2B/NLGN1/CNKSR2/PSD3	62
CC	GO:0150034	distal axon	57/1488	287/19520	1.71584e-11	7.02423e-10	4.80887e-10	RAB3A/GPM6A/SYAP1/PRRT2/CALM1/TSPOAP1/GAP43/ARPC3/HSP90AB1/NRSN1/NCS1/PRKCB/ELK1/CCK/MAP2/SNAP25/STMN3/COBL/NDRG2/SNCG/FEZ1/PTPRN/ATCAY/SHTN1/MAPK8IP3/ALS2/MAPK8IP1/OLFM1/CPLX1/GRIN1/SYP/YWHAE/PRKCG/CALM3/LAMP5/CALB1/CRMP1/FLNA/AUTS2/CALB2/TIMP2/MAP3K12/RNF40/ADORA1/FLRT3/PALLD/BRSK2/NEFL/FXR1/PTPRN2/DSCAM/STX3/PTPRO/PTK2B/SLC32A1/MYH14/GAD1	57
CC	GO:0099572	postsynaptic specialization	62/1488	333/19520	3.91422e-11	1.50813e-09	1.03248e-09	CAMK2A/CAMK2N1/RPL38/PJA2/RPS14/PDLIM5/NEFH/PRRT2/GAP43/ADD3/PRNP/RPS25/NCS1/BAALC/NRGN/RPS27/CLSTN1/RPS3/BCAS1/GRIA2/ATP1A1/BNIP3/NPTN/FABP5/CACNG3/SPOCK1/CABP1/SIPA1L1/RTN4/CNIH2/FYN/GRIN1/DLGAP2/DCLK1/CAP2/CDH2/PRKCG/NSF/RUSC1/RPL30/LYN/STX1A/KCND2/SH2D5/ADD1/CACNA1C/RPS18/MPP2/ADORA1/NLGN4X/BSN/LRFN3/FXR1/GPHN/RPS19/RPL23/HOMER1/DNAJB1/PTK2B/NLGN1/CNKSR2/PSD3	62
CC	GO:0098793	presynapse	78/1488	487/19520	2.68619e-10	9.77475e-09	6.69191e-09	MT3/RAB3A/ACTB/PTN/GPM6A/SV2B/SYAP1/PDLIM5/PRRT2/CALM1/TSPOAP1/NCS1/PRKCB/SVOP/ELK1/CCK/RPS27/KCNJ10/SNAP25/RAB10/SH3GL2/SNCG/SCN2A/NPTN/PTPRN/RPH3A/ATCAY/RAB15/GAD2/KIAA1109/RAB40C/YWHAG/SLC1A2/CPLX1/SLC30A3/GRIN1/SYP/CANX/RAB5B/CDH2/SLC2A8/PRKCG/BACE1/CALM3/GRM4/LAMP5/CALB1/VAMP2/STX1A/SV2A/SNCAIP/SYT1/PPP1CC/FZD3/GABBR1/CALB2/HTR2A/RNF40/VDAC2/ADORA1/NLGN4X/SYNPR/FLRT3/BSN/LRFN3/NEFL/FXR1/RAB2…	78
CC	GO:0030133	transport vesicle	65/1488	402/19520	5.71374e-09	1.96974e-07	1.34851e-07	MT3/CHGA/RAB3A/SV2B/CPE/PRRT2/CALM1/NRSN1/SVOP/NRGN/CNST/SNAP25/FGFR3/RAB10/SH3GL2/PAM/PTPRN/HLA-DPB1/RPH3A/RAB15/GAD2/RAB40C/CNIH2/SCAP/AP3S1/SYT13/SLC30A3/GRIN1/AP1G2/SYP/B2M/SEC31A/RAB5B/BGN/SLC2A8/BACE1/CALM3/LAMP5/VAMP2/STX1A/SV2A/SNCAIP/SYT1/CD55/SPG21/VDAC2/CD59/ANKRD27/SYNPR/BSN/PEF1/CLTC/RAB26/PTPRN2/RAB11A/CD74/FURIN/SAR1A/STX3/PLIN3/SORL1/SYT4/SLC32A1/DOC2A/LGI3	65
CC	GO:0030658	transport vesicle membrane	40/1488	206/19520	3.39882e-08	1.11311e-06	7.62052e-07	RAB3A/SV2B/CPE/PRRT2/CALM1/SVOP/NRGN/SH3GL2/PAM/PTPRN/HLA-DPB1/RPH3A/GAD2/CNIH2/SCAP/SLC30A3/AP1G2/SYP/B2M/SEC31A/RAB5B/CALM3/LAMP5/VAMP2/STX1A/SV2A/SYT1/CD59/SYNPR/BSN/PEF1/CLTC/RAB26/PTPRN2/CD74/SAR1A/SORL1/SYT4/SLC32A1/DOC2A	40
CC	GO:0030426	growth cone	36/1488	178/19520	5.5454e-08	1.72964e-06	1.18413e-06	GPM6A/SYAP1/CALM1/GAP43/ARPC3/HSP90AB1/NRSN1/MAP2/SNAP25/STMN3/COBL/NDRG2/FEZ1/ATCAY/SHTN1/MAPK8IP3/ALS2/MAPK8IP1/OLFM1/YWHAE/CALM3/LAMP5/CRMP1/FLNA/AUTS2/TIMP2/MAP3K12/FLRT3/PALLD/NEFL/FXR1/DSCAM/STX3/PTPRO/PTK2B/MYH14	36
CC	GO:0030427	site of polarized growth	36/1488	184/19520	1.333e-07	3.9687e-06	2.71702e-06	GPM6A/SYAP1/CALM1/GAP43/ARPC3/HSP90AB1/NRSN1/MAP2/SNAP25/STMN3/COBL/NDRG2/FEZ1/ATCAY/SHTN1/MAPK8IP3/ALS2/MAPK8IP1/OLFM1/YWHAE/CALM3/LAMP5/CRMP1/FLNA/AUTS2/TIMP2/MAP3K12/FLRT3/PALLD/NEFL/FXR1/DSCAM/STX3/PTPRO/PTK2B/MYH14	36
CC	GO:1990204	oxidoreductase complex	26/1488	111/19520	1.90504e-07	5.42522e-06	3.71417e-06	NDUFA4/UQCR10/NDUFC2/NDUFA5/NDUFB4/NDUFV1/GCSH/PDHB/DBT/NDUFA10/NDUFB5/NDUFS8/NDUFS7/NDUFB8/SDHD/SDHC/SDHA/MRPS36/OGDHL/NDUFB10/DLD/OGDH/NDUFS5/BCKDK/CBR4/NDUFB7	26
CC	GO:0043025	neuronal cell body	68/1488	474/19520	3.0582e-07	8.34634e-06	5.71401e-06	SLC1A3/CAMK2N1/ATP1A3/GPM6A/APOE/SYAP1/DDN/CKB/ENO2/GAP43/ENC1/DIP2B/HSP90AB1/NRSN1/NRGN/APOD/ELK1/GDI1/CCK/SOD1/MAP2/PVALB/EEF1A2/ATP1A2/COBL/SLC38A2/RACK1/GRIA2/KCNB1/SH3GL2/PAM/SNCG/FEZ1/PTPRN/UBB/SLC38A1/SHTN1/MAST1/RTN4/DNER/OLFM1/CPLX1/PSD2/BACE1/BRINP1/CALB1/CPNE6/SV2A/SNCAIP/CRMP1/KCND2/FZD3/FLNA/TIMP2/CACNA1C/HTR2A/PPARGC1A/ADORA1/NDN/FXR1/DSCAM/PRKAR2B/DNAJB1/NQO1/HPCA/PTK2B/CNKSR2/SYT4	68
CC	GO:0030672	synaptic vesicle membrane	24/1488	103/19520	6.17471e-07	1.55555e-05	1.06495e-05	RAB3A/SV2B/PRRT2/CALM1/SVOP/SH3GL2/RPH3A/GAD2/SLC30A3/SYP/RAB5B/CALM3/LAMP5/VAMP2/STX1A/SV2A/SYT1/SYNPR/BSN/RAB26/PTPRN2/SYT4/SLC32A1/DOC2A	24
CC	GO:0099501	exocytic vesicle membrane	24/1488	103/19520	6.17471e-07	1.55555e-05	1.06495e-05	RAB3A/SV2B/PRRT2/CALM1/SVOP/SH3GL2/RPH3A/GAD2/SLC30A3/SYP/RAB5B/CALM3/LAMP5/VAMP2/STX1A/SV2A/SYT1/SYNPR/BSN/RAB26/PTPRN2/SYT4/SLC32A1/DOC2A	24
CC	GO:0008021	synaptic vesicle	36/1488	197/19520	7.61631e-07	1.84766e-05	1.26493e-05	MT3/RAB3A/SV2B/PRRT2/CALM1/SVOP/SNAP25/RAB10/SH3GL2/RPH3A/RAB15/GAD2/RAB40C/SLC30A3/GRIN1/SYP/RAB5B/SLC2A8/BACE1/CALM3/LAMP5/VAMP2/STX1A/SV2A/SNCAIP/SYT1/VDAC2/SYNPR/BSN/RAB26/PTPRN2/STX3/SYT4/SLC32A1/DOC2A/LGI3	36
CC	GO:0044306	neuron projection terminus	27/1488	130/19520	1.43545e-06	3.35793e-05	2.29888e-05	RAB3A/PRRT2/TSPOAP1/NCS1/PRKCB/ELK1/CCK/SNCG/PTPRN/SCRG1/ATCAY/CPLX1/GRIN1/SYP/PRKCG/CALB1/VAMP2/SYT1/CALB2/RNF40/ADORA1/FLRT3/BSN/PTPRN2/SYT4/SLC32A1/GAD1	27
CC	GO:0098803	respiratory chain complex	21/1488	87/19520	1.66342e-06	3.75704e-05	2.57212e-05	NDUFA4/UQCR10/NDUFC2/NDUFA5/NDUFB4/NDUFV1/COX5A/COX4I1/COX7C/NDUFA10/NDUFB5/COX8A/NDUFS8/NDUFS7/NDUFB8/SDHD/SDHC/SDHA/NDUFB10/NDUFS5/NDUFB7	21
CC	GO:0070382	exocytic vesicle	37/1488	215/19520	2.41088e-06	5.26375e-05	3.60363e-05	MT3/RAB3A/SV2B/PRRT2/CALM1/SVOP/SNAP25/RAB10/SH3GL2/RPH3A/RAB15/GAD2/RAB40C/SYT13/SLC30A3/GRIN1/SYP/RAB5B/SLC2A8/BACE1/CALM3/LAMP5/VAMP2/STX1A/SV2A/SNCAIP/SYT1/VDAC2/SYNPR/BSN/RAB26/PTPRN2/STX3/SYT4/SLC32A1/DOC2A/LGI3	37
CC	GO:0031838	haptoglobin-hemoglobin complex	7/1488	11/19520	3.7028e-06	7.82367e-05	5.35618e-05	HBB/HBD/HP/HBA1/HBA2/HBQ1/HBG1	7
CC	GO:0005874	microtubule	59/1488	423/19520	4.53772e-06	9.28815e-05	6.35878e-05	TUBB2B/GOLGA2/TUBA1A/CALM1/TPT1/DYNC1H1/TUBB2A/BEX4/TUBA1C/TUBGCP4/HAUS2/MAP6D1/MAP2/DYNLL1/CDK5RAP3/KIFC2/FEZ1/CLIP3/TUBB4B/REEP2/TBCA/DYNC1LI2/SHTN1/CCT7/PCNT/TBCB/TUBA1B/CYLD/XIAP/APC2/GABARAPL1/MTUS1/KIFC3/RUSC1/DYNLRB1/CALM3/KIF3B/DYNC1I1/DNAL4/CLIP2/EML1/NDE1/PBXIP1/CALM2/REEP1/CDK2AP2/EMD/MAPRE1/TBCE/JAKMIP1/PSRC1/CLTC/EML2/LRRC49/RAB11A/KIFAP3/KLC2/TPPP/CSPP1	59
CC	GO:0098562	cytoplasmic side of membrane	33/1488	191/19520	7.60141e-06	0.000150876	0.000103292	GNA11/EEF1A1/SYAP1/RPS26/S100A6/GNAI2/SNAP25/EEF1A2/CHMP4B/CYTH1/RPL27/FKBP1A/FERMT2/FYN/CYLD/DNAJA1/GNAO1/GNAS/LYN/EPM2AIP1/RAC1/KIT/RPS28/CACNB4/KCNIP1/RGS1/RASA3/ESYT1/GNG7/GNG11/TNK2/PTK2B/STAC2	33
CC	GO:0070469	respirasome	22/1488	103/19520	8.2057e-06	0.000155313	0.000106329	NDUFA4/UQCR10/NDUFC2/NDUFA5/NDUFB4/NDUFV1/COX5A/COX4I1/COX7C/NDUFA10/NDUFB5/COX8A/NDUFS8/NDUFS7/NDUFB8/SDHD/SDHC/SDHA/NDUFB10/HIGD1A/NDUFS5/NDUFB7	22
CC	GO:0005890	sodium:potassium-exchanging ATPase complex	7/1488	12/19520	8.29916e-06	0.000155313	0.000106329	ATP1A3/ATP1A2/ATP1B1/ATP1A1/ATP1B3/ATP1B2/FXYD1	7
CC	GO:0005746	mitochondrial respirasome	20/1488	89/19520	9.37984e-06	0.000170661	0.000116837	NDUFA4/UQCR10/NDUFC2/NDUFA5/NDUFB4/NDUFV1/COX5A/COX4I1/COX7C/NDUFA10/NDUFB5/NDUFS8/NDUFS7/NDUFB8/SDHD/SDHC/SDHA/NDUFB10/NDUFS5/NDUFB7	20
CC	GO:0101002	ficolin-1-rich granule	32/1488	185/19520	1.01313e-05	0.000179352	0.000122786	ALDOC/ATP6V0C/HSPA1B/EEF1A1/FTH1/HBB/HSP90AB1/SRP14/ATP6V0A1/CST3/PFKL/MIF/YPEL5/SIRPA/DYNLL1/HSPA6/CTSB/CAPN1/EEF2/PSMD11/PSMC3/RAC1/TIMP2/CTSZ/CD55/COMMD9/IMPDH2/APEH/PTPRN2/COTL1/PRCP/ATP6AP2	32
CC	GO:0042470	melanosome	22/1488	106/19520	1.33176e-05	0.000223667	0.000153125	ATP6V1B2/HSP90AB1/ATP6V0A1/TPP1/FASN/ATP1A1/ATP1B3/STOM/CTSB/CANX/YWHAE/RAB5B/GANAB/RAC1/TFRC/SGSM2/RAN/ANKRD27/CLTC/RPN1/CALU/STX3	22
CC	GO:0048770	pigment granule	22/1488	106/19520	1.33176e-05	0.000223667	0.000153125	ATP6V1B2/HSP90AB1/ATP6V0A1/TPP1/FASN/ATP1A1/ATP1B3/STOM/CTSB/CANX/YWHAE/RAB5B/GANAB/RAC1/TFRC/SGSM2/RAN/ANKRD27/CLTC/RPN1/CALU/STX3	22
CC	GO:0031234	extrinsic component of cytoplasmic side of plasma membrane	21/1488	100/19520	1.72024e-05	0.000280119	0.000191773	GNA11/SYAP1/S100A6/GNAI2/SNAP25/CYTH1/FERMT2/FYN/CYLD/GNAO1/GNAS/LYN/RAC1/KCNIP1/RGS1/ESYT1/GNG7/GNG11/TNK2/PTK2B/STAC2	21
CC	GO:0098982	GABA-ergic synapse	16/1488	64/19520	1.75342e-05	0.000280119	0.000191773	GAP43/RPS27/CLSTN1/NPTN/SLITRK2/CALB1/SV2A/KCND2/GABBR1/ABHD6/GLRB/NLGN4X/BSN/PLCB1/PTPRO/SLC32A1	16
CC	GO:0030665	clathrin-coated vesicle membrane	23/1488	117/19520	2.16941e-05	0.000338324	0.000231621	RAB3A/APOE/NRGN/SH3GL2/CEMIP/HLA-DPB1/GAD2/AP2B1/SGIP1/AP2S1/AP1G2/SLC2A8/NECAP1/VAMP2/TFRC/SCARB2/SYT1/CLTC/LDLR/CD74/EPN1/SLC32A1/GAD1	23
CC	GO:0098533	ATPase dependent transmembrane transport complex	8/1488	18/19520	2.44669e-05	0.000372694	0.000255151	ATP1A3/ATP1A2/ATP1B1/ATP1A1/ATP1B3/ATP1B2/FXYD1/ABCA2	8
CC	GO:0043197	dendritic spine	30/1488	177/19520	2.83078e-05	0.0004214	0.000288496	CAMK2A/GPM6A/DDN/PRRT2/NRGN/CLSTN1/FBXO2/ATP1A2/GRIA2/RPH3A/SIPA1L1/CNIH2/GRIN1/CALB1/RAC1/PPP1CC/KCND2/MPP2/ADORA1/FXR1/ARHGAP33/TANC2/PRKAR2B/HOMER1/DNAJB1/ATP6AP2/HPCA/PTPRO/PTK2B/NLGN1	30
CC	GO:0019898	extrinsic component of membrane	44/1488	304/19520	2.91488e-05	0.000424277	0.000290465	GNA11/SYAP1/SNX10/PRNP/S100A6/ACADVL/MGLL/GNAI2/SNAP25/RPH3A/STK39/CYTH1/FKBP1A/FERMT2/MAL/FYN/CYLD/GRIPAP1/GNAO1/GNAS/CDH2/APC2/LYN/MFGE8/RAC1/RNF40/RGS6/KCNIP1/SOX10/RGS1/JAKMIP1/ESYT1/OPA1/GNG7/GNG11/HPCA/TNK2/STOML2/PTK2B/CNKSR2/STAC2/DOC2A/ANXA1/GOLGA3	44
CC	GO:0045240	dihydrolipoyl dehydrogenase complex	6/1488	10/19520	3.12057e-05	0.000440488	0.000301564	DBT/MRPS36/OGDHL/DLD/OGDH/BCKDK	6
CC	GO:0044309	neuron spine	30/1488	178/19520	3.16075e-05	0.000440488	0.000301564	CAMK2A/GPM6A/DDN/PRRT2/NRGN/CLSTN1/FBXO2/ATP1A2/GRIA2/RPH3A/SIPA1L1/CNIH2/GRIN1/CALB1/RAC1/PPP1CC/KCND2/MPP2/ADORA1/FXR1/ARHGAP33/TANC2/PRKAR2B/HOMER1/DNAJB1/ATP6AP2/HPCA/PTPRO/PTK2B/NLGN1	30
CC	GO:0030662	coated vesicle membrane	30/1488	182/19520	4.85869e-05	0.000663009	0.000453904	RAB3A/APOE/NRGN/SH3GL2/CEMIP/HLA-DPB1/GAD2/AP2B1/CNIH2/SCAP/SGIP1/AP2S1/AP1G2/B2M/SEC31A/SLC2A8/NECAP1/VAMP2/TFRC/SCARB2/SYT1/CD59/PEF1/CLTC/LDLR/CD74/SAR1A/EPN1/SLC32A1/GAD1	30
CC	GO:1904813	ficolin-1-rich granule lumen	23/1488	124/19520	5.66777e-05	0.00075763	0.000518683	ALDOC/HSPA1B/EEF1A1/FTH1/HBB/HSP90AB1/SRP14/CST3/PFKL/MIF/YPEL5/HSPA6/CTSB/CAPN1/EEF2/PSMD11/PSMC3/TIMP2/CTSZ/COMMD9/IMPDH2/APEH/COTL1	23
CC	GO:0005774	vacuolar membrane	56/1488	431/19520	6.07057e-05	0.000795245	0.000544434	GNA11/ATP6V0C/EEF1A1/ATP6V1B2/IFITM3/HSP90AB1/ATP6V1E1/ATP6V0A1/NAPB/TMEM9/NDUFC2/UBA52/ITM2C/ATP6V1D/EEF1A2/RRAGC/HLA-DPB1/ATP6V0B/STOM/TMEM59/TMBIM1/AP2B1/GPR137B/TMEM175/TMEM63A/AP2S1/RRAGD/SLC30A3/RPN2/VPS35/CTSA/SLC2A8/GABARAPL1/SLC48A1/NSF/LAMP5/SCARB2/MGST1/VPS41/SPHK2/ABHD6/UBA1/ATP6V1H/PLEKHM1/TECPR1/MMD/CYBRD1/DDOST/CLTC/KPTN/TMEM79/LDLR/CD74/PRCP/ATP6AP2/ABCA2	56
CC	GO:0030135	coated vesicle	42/1488	295/19520	6.43833e-05	0.000826884	0.000566095	RAB3A/APOE/GOLGA2/VWF/NRGN/SH3GL2/CEMIP/HLA-DPB1/GAD2/AP2B1/CNIH2/SCAP/SGIP1/AP2S1/AP1G2/B2M/SEC31A/SLC2A8/NECAP1/ERGIC3/VAMP2/CPNE6/TFRC/SCARB2/SYT1/USE1/VPS41/LMAN2L/CTSZ/SPG21/CD59/PEF1/CLTC/LDLR/CD74/FURIN/SAR1A/EPN1/TNK2/YIPF6/SLC32A1/GAD1	42
CC	GO:0005747	mitochondrial respiratory chain complex I	13/1488	50/19520	6.84135e-05	0.000829831	0.000568112	NDUFA4/NDUFC2/NDUFA5/NDUFB4/NDUFV1/NDUFA10/NDUFB5/NDUFS8/NDUFS7/NDUFB8/NDUFB10/NDUFS5/NDUFB7	13
CC	GO:0030964	NADH dehydrogenase complex	13/1488	50/19520	6.84135e-05	0.000829831	0.000568112	NDUFA4/NDUFC2/NDUFA5/NDUFB4/NDUFV1/NDUFA10/NDUFB5/NDUFS8/NDUFS7/NDUFB8/NDUFB10/NDUFS5/NDUFB7	13
CC	GO:0045271	respiratory chain complex I	13/1488	50/19520	6.84135e-05	0.000829831	0.000568112	NDUFA4/NDUFC2/NDUFA5/NDUFB4/NDUFV1/NDUFA10/NDUFB5/NDUFS8/NDUFS7/NDUFB8/NDUFB10/NDUFS5/NDUFB7	13
CC	GO:0098563	intrinsic component of synaptic vesicle membrane	12/1488	44/19520	7.8118e-05	0.000930314	0.000636904	RAB3A/SLC30A3/SYP/RAB5B/STX1A/SV2A/SYT1/SYNPR/RAB26/PTPRN2/SYT4/SLC32A1	12
CC	GO:0044305	calyx of Held	7/1488	16/19520	9.1256e-05	0.00106481	0.00072898	TSPOAP1/NCS1/PRKCB/CPLX1/PRKCG/CALB1/ADORA1	7
CC	GO:0005765	lysosomal membrane	50/1488	378/19520	9.42883e-05	0.00106481	0.00072898	GNA11/ATP6V0C/EEF1A1/ATP6V1B2/IFITM3/HSP90AB1/ATP6V1E1/ATP6V0A1/TMEM9/NDUFC2/UBA52/ITM2C/ATP6V1D/EEF1A2/HLA-DPB1/STOM/TMEM59/TMBIM1/AP2B1/GPR137B/TMEM175/TMEM63A/AP2S1/SLC30A3/VPS35/CTSA/SLC2A8/SLC48A1/NSF/LAMP5/SCARB2/MGST1/VPS41/SPHK2/ABHD6/UBA1/ATP6V1H/PLEKHM1/TECPR1/MMD/CYBRD1/DDOST/CLTC/KPTN/TMEM79/LDLR/CD74/PRCP/ATP6AP2/ABCA2	50
CC	GO:0098852	lytic vacuole membrane	50/1488	378/19520	9.42883e-05	0.00106481	0.00072898	GNA11/ATP6V0C/EEF1A1/ATP6V1B2/IFITM3/HSP90AB1/ATP6V1E1/ATP6V0A1/TMEM9/NDUFC2/UBA52/ITM2C/ATP6V1D/EEF1A2/HLA-DPB1/STOM/TMEM59/TMBIM1/AP2B1/GPR137B/TMEM175/TMEM63A/AP2S1/SLC30A3/VPS35/CTSA/SLC2A8/SLC48A1/NSF/LAMP5/SCARB2/MGST1/VPS41/SPHK2/ABHD6/UBA1/ATP6V1H/PLEKHM1/TECPR1/MMD/CYBRD1/DDOST/CLTC/KPTN/TMEM79/LDLR/CD74/PRCP/ATP6AP2/ABCA2	50
CC	GO:0005775	vacuolar lumen	28/1488	173/19520	0.000118296	0.0012884	0.000882057	SDC3/DYNC1H1/TPP1/SERPINA3/TTR/FABP5/PA2G4/TUBB4B/RNASET2/CTSB/DCN/BGN/CTSA/BCAN/OGN/NPC2/GCA/PRELP/SCARB2/CAP1/CREG1/GALC/CTSL/CD74/PDGFRB/TRAPPC1/C3/NAPRT	28
CC	GO:0005833	hemoglobin complex	6/1488	12/19520	0.000120119	0.0012884	0.000882057	HBB/HBD/HBA1/HBA2/HBQ1/HBG1	6
CC	GO:0060198	clathrin-sculpted vesicle	6/1488	12/19520	0.000120119	0.0012884	0.000882057	RAB3A/GAD2/VAMP2/SYT1/SLC32A1/GAD1	6
CC	GO:0045121	membrane raft	44/1488	323/19520	0.000123923	0.0012884	0.000882057	TUBA1A/MAPK3/PRNP/GJA1/TPP1/BAALC/GNAI2/LDHB/SPRED1/ATP1A2/ATP1B1/ATP1A1/FAIM2/CLIP3/ATP1B3/ADGRG1/STOM/EEF2/MAL/SLC1A2/PLLP/FYN/PAG1/TUBA1B/PPP2CA/S1PR1/CDH2/BACE1/LYN/KCND2/CD55/SLC9A1/HTR2A/MLC1/KCNA5/PLVAP/NOS1AP/FXYD1/PRKAR2B/FURIN/TLR2/STOML2/PTK2B/MAL2	44
CC	GO:0098857	membrane microdomain	44/1488	323/19520	0.000123923	0.0012884	0.000882057	TUBA1A/MAPK3/PRNP/GJA1/TPP1/BAALC/GNAI2/LDHB/SPRED1/ATP1A2/ATP1B1/ATP1A1/FAIM2/CLIP3/ATP1B3/ADGRG1/STOM/EEF2/MAL/SLC1A2/PLLP/FYN/PAG1/TUBA1B/PPP2CA/S1PR1/CDH2/BACE1/LYN/KCND2/CD55/SLC9A1/HTR2A/MLC1/KCNA5/PLVAP/NOS1AP/FXYD1/PRKAR2B/FURIN/TLR2/STOML2/PTK2B/MAL2	44
CC	GO:0043679	axon terminus	21/1488	114/19520	0.000129728	0.00132769	0.00090895	RAB3A/PRRT2/TSPOAP1/NCS1/PRKCB/ELK1/CCK/SNCG/PTPRN/CPLX1/GRIN1/SYP/PRKCG/CALB1/CALB2/RNF40/ADORA1/FLRT3/PTPRN2/SLC32A1/GAD1	21
CC	GO:0060205	cytoplasmic vesicle lumen	44/1488	326/19520	0.000153193	0.00154372	0.00105685	SPARC/ALDOC/CLU/EEF1A1/VWF/SLPI/HSP90AB1/SRP14/DYNC1H1/PFKL/MIF/SERPINA3/HP/XRCC5/TTR/FABP5/PA2G4/TUBB4B/HSPA6/RNASET2/EEF2/PSMD11/B2M/TIMP1/CTSA/SPTAN1/BACE1/PSMC3/NPC2/GCA/S100A8/CAP1/TIMP2/CTSZ/COMMD9/LTF/IMPDH2/ARMC8/CREG1/PDGFA/COTL1/TRAPPC1/C3/NAPRT	44
CC	GO:0031983	vesicle lumen	44/1488	328/19520	0.000176039	0.00174705	0.00119605	SPARC/ALDOC/CLU/EEF1A1/VWF/SLPI/HSP90AB1/SRP14/DYNC1H1/PFKL/MIF/SERPINA3/HP/XRCC5/TTR/FABP5/PA2G4/TUBB4B/HSPA6/RNASET2/EEF2/PSMD11/B2M/TIMP1/CTSA/SPTAN1/BACE1/PSMC3/NPC2/GCA/S100A8/CAP1/TIMP2/CTSZ/COMMD9/LTF/IMPDH2/ARMC8/CREG1/PDGFA/COTL1/TRAPPC1/C3/NAPRT	44
CC	GO:0019897	extrinsic component of plasma membrane	27/1488	169/19520	0.000193346	0.00186956	0.00127993	GNA11/SYAP1/S100A6/GNAI2/SNAP25/CYTH1/FERMT2/FYN/CYLD/GNAO1/GNAS/CDH2/APC2/LYN/MFGE8/RAC1/KCNIP1/RGS1/ESYT1/GNG7/GNG11/TNK2/STOML2/PTK2B/CNKSR2/STAC2/ANXA1	27
CC	GO:0014704	intercalated disc	12/1488	48/19520	0.000194092	0.00186956	0.00127993	YWHAH/GJA1/ATP1A2/ATP1B1/SCN2A/ATP1A1/CDH2/ANK3/SLC9A1/KCNA5/FXYD1/VAMP5	12
CC	GO:0034774	secretory granule lumen	43/1488	322/19520	0.000229176	0.00217551	0.00148938	SPARC/ALDOC/CLU/EEF1A1/VWF/SLPI/HSP90AB1/SRP14/DYNC1H1/PFKL/MIF/SERPINA3/HP/XRCC5/TTR/FABP5/PA2G4/TUBB4B/HSPA6/RNASET2/EEF2/PSMD11/B2M/TIMP1/CTSA/SPTAN1/PSMC3/NPC2/GCA/S100A8/CAP1/TIMP2/CTSZ/COMMD9/LTF/IMPDH2/ARMC8/CREG1/PDGFA/COTL1/TRAPPC1/C3/NAPRT	43
CC	GO:0098798	mitochondrial protein-containing complex	37/1488	265/19520	0.000253575	0.00237273	0.0016244	NDUFA4/UQCR10/NDUFC2/NDUFA5/NDUFB4/NDUFV1/COX5A/COX4I1/COX7C/MRPL24/PDHB/DBT/HSPA9/MRPL57/NDUFA10/NDUFB5/NDUFS8/NDUFS7/MRPL16/TOMM40L/NDUFB8/MRPL17/SDHD/SDHC/SDHA/MRPS6/MRPL41/MRPS36/NDUFB10/MRPL37/SLC25A6/NDUFS5/MRPS33/BCKDK/MRPL45/HSD17B10/NDUFB7	37
CC	GO:0070820	tertiary granule	26/1488	164/19520	0.00028521	0.00263117	0.00180133	ALDOC/ATP6V0C/FTH1/HBB/METTL7A/ATP6V0A1/CST3/YPEL5/SIRPA/DYNLL1/SNAP25/HP/STOM/TMEM63A/B2M/SPTAN1/CYSTM1/RAC1/TIMP2/CD55/LTF/ARMC8/CD59/PTPRN2/PRCP/ATP6AP2	26
CC	GO:0030136	clathrin-coated vesicle	29/1488	192/19520	0.000306628	0.00278946	0.0019097	RAB3A/APOE/VWF/NRGN/SH3GL2/CEMIP/HLA-DPB1/GAD2/AP2B1/SGIP1/AP2S1/AP1G2/SLC2A8/NECAP1/VAMP2/CPNE6/TFRC/SCARB2/SYT1/VPS41/SPG21/CLTC/LDLR/CD74/FURIN/EPN1/TNK2/SLC32A1/GAD1	29
CC	GO:0000159	protein phosphatase type 2A complex	7/1488	19/19520	0.000327864	0.0029418	0.00201399	PPP2R1A/PPP2R2C/PPP2CA/PPP2R5B/PPP2R3B/PPP2R2B/PPP2R5E	7
CC	GO:0045239	tricarboxylic acid cycle enzyme complex	6/1488	14/19520	0.000341667	0.00302421	0.00207041	DBT/MRPS36/OGDHL/DLD/OGDH/BCKDK	6
CC	GO:0008287	protein serine/threonine phosphatase complex	12/1488	51/19520	0.000357375	0.00308001	0.00210861	PPP2R1A/PPP3R1/WDR82/PPP2R2C/PPP2CA/PPP2R5B/PPP4R1/PPP1CC/PPP1R3C/PPP2R3B/PPP2R2B/PPP2R5E	12
CC	GO:1903293	phosphatase complex	12/1488	51/19520	0.000357375	0.00308001	0.00210861	PPP2R1A/PPP3R1/WDR82/PPP2R2C/PPP2CA/PPP2R5B/PPP4R1/PPP1CC/PPP1R3C/PPP2R3B/PPP2R2B/PPP2R5E	12
CC	GO:0030285	integral component of synaptic vesicle membrane	9/1488	31/19520	0.000366649	0.0031189	0.00213524	SLC30A3/SYP/STX1A/SV2A/SYT1/SYNPR/PTPRN2/SYT4/SLC32A1	9
CC	GO:0042641	actomyosin	15/1488	74/19520	0.000398259	0.00334436	0.00228959	FAM107A/PDLIM5/HDAC4/MYH10/ABLIM1/ILK/FERMT2/BAG3/NEBL/STX1A/MYH7/TRIP6/PALLD/PRICKLE4/MYH14	15
CC	GO:0030016	myofibril	32/1488	224/19520	0.000428175	0.00355006	0.00243041	CSRP1/FBXL22/PDLIM5/CALM1/HDAC4/ILK/FKBP1A/FERMT2/ENO1/SCN1A/BAG3/SYNM/CALM3/NEBL/FKBP1B/MYH7/MYBPC1/CALM2/FLNA/SQSTM1/PSMA6/CACNA1C/ANK3/KCNA5/TNNT1/PALLD/HABP4/FXR1/PRICKLE4/NOS1AP/HOMER1/KRT19	32
CC	GO:0071682	endocytic vesicle lumen	7/1488	20/19520	0.000471376	0.00385939	0.00264219	SPARC/APOE/HBB/HP/HBA1/HBA2/LTF	7
CC	GO:0042383	sarcolemma	22/1488	134/19520	0.000497012	0.00401905	0.00275149	AQP1/PPP3R1/ATP1A2/ATP1B1/SLC38A2/KCNB1/SCN2A/ATP1A1/SNTA1/BGN/CDH2/SYNM/COL6A2/CACNA1C/ANK3/SLC9A1/NOS1AP/FXYD1/SMPD4/STAC2/ANXA1/KRT19	22
CC	GO:0030139	endocytic vesicle	40/1488	307/19520	0.000612459	0.0048922	0.00334926	CAMK2A/SPARC/APOE/ATP6V0C/HBB/STXBP4/ATP6V0A1/VIM/CDC42EP4/UBC/UBA52/HP/RAB10/GRIA2/SH3GL2/CEMIP/HLA-DPB1/HBA1/CACNG3/HBA2/UBB/ATP6V0B/AP2B1/RABEP1/SGIP1/AP2S1/RAB11FIP4/B2M/RAB5B/TAP1/CPNE6/SCARB2/LTF/ITGB5/CLTC/RAB11A/LDLR/CD74/RALA/TLR2	40
CC	GO:0097060	synaptic membrane	46/1488	368/19520	0.000626821	0.0049466	0.0033865	GPM6A/SYAP1/DDN/PRRT2/NRGN/CLSTN1/SNAP25/GRIA2/KCNB1/SCN2A/FAIM2/NPTN/GABRA1/RPH3A/CACNG3/GAD2/SNTA1/CNIH2/SLC1A2/SLITRK2/GRIN1/SYP/CDH2/CHRNA5/PRKCG/STX1A/SNCAIP/SYT1/KCND2/GABBR1/ABHD6/CALB2/CACNA1C/ANK3/HTR2A/GLRB/ADORA1/NLGN4X/FLRT3/LRFN3/GPHN/STX3/ATP6AP2/NLGN1/CNKSR2/ANXA1	46
CC	GO:0000502	proteasome complex	13/1488	62/19520	0.000679656	0.0052997	0.00362824	PSMA7/PSMC5/PSMD11/PAAF1/PSMB3/HSPB1/PSMC3/PSMA1/PSMA6/PSMD4/PSMC4/PSMB5/ADRM1	13
CC	GO:0031252	cell leading edge	50/1488	411/19520	0.000695181	0.00535698	0.00366746	FAM107A/ACTB/EEF1A1/DDN/ATP6V1B2/ARPC3/S100A6/LMO4/VIM/PLEKHA1/RPS3/COBL/KCNB1/C2CD5/GABRA1/MYH10/ABLIM1/ILK/SHTN1/FERMT2/ALS2/VASP/EVL/PSD2/CDH2/PARD6A/APC2/GABARAPL1/LAMP5/RAC1/DUSP22/EPB41L3/PLCE1/LAYN/SLC9A1/TESC/MPP2/ADORA1/PALLD/KPTN/PIP5K1C/STX3/ATP6AP2/HPCA/PTPRO/PTK2B/AIF1/PSD3/TLN2/SH3YL1	50
CC	GO:0048786	presynaptic active zone	14/1488	70/19520	0.000708376	0.00539519	0.00369361	RAB3A/GPM6A/NPTN/SYP/CDH2/STX1A/SV2A/FZD3/ADORA1/BSN/LRFN3/STX3/SLC32A1/GAD1	14
CC	GO:0043292	contractile fiber	32/1488	231/19520	0.000734839	0.00553241	0.00378755	CSRP1/FBXL22/PDLIM5/CALM1/HDAC4/ILK/FKBP1A/FERMT2/ENO1/SCN1A/BAG3/SYNM/CALM3/NEBL/FKBP1B/MYH7/MYBPC1/CALM2/FLNA/SQSTM1/PSMA6/CACNA1C/ANK3/KCNA5/TNNT1/PALLD/HABP4/FXR1/PRICKLE4/NOS1AP/HOMER1/KRT19	32
CC	GO:1904724	tertiary granule lumen	12/1488	55/19520	0.000743783	0.00553611	0.00379009	ALDOC/FTH1/HBB/METTL7A/CST3/YPEL5/HP/B2M/SPTAN1/TIMP2/LTF/ARMC8	12
CC	GO:0030017	sarcomere	29/1488	203/19520	0.000776958	0.0056777	0.00388703	CSRP1/FBXL22/PDLIM5/CALM1/HDAC4/ILK/FKBP1A/FERMT2/ENO1/SCN1A/BAG3/CALM3/NEBL/FKBP1B/MYH7/CALM2/FLNA/SQSTM1/PSMA6/CACNA1C/ANK3/KCNA5/TNNT1/PALLD/HABP4/PRICKLE4/NOS1AP/HOMER1/KRT19	29
CC	GO:0005759	mitochondrial matrix	56/1488	476/19520	0.000780142	0.0056777	0.00388703	GLUD1/ACADVL/ETNPPL/SOD1/RPS3/GPT2/PDK4/MRPL24/GCSH/ACSS1/PDHB/DBT/AK3/HSPA9/MRPL57/NDUFA10/COASY/NDUFS8/TK2/PPM1K/NDUFS7/MRPL16/ECHS1/ALDH2/NDUFB8/ISCU/ALDH4A1/MRPL17/GSTK1/ALDH5A1/GLUD2/ETFDH/ACOT2/MDH2/MRPS6/MRPL41/VDAC2/MRPS36/HOGA1/OGDHL/ALAS1/MRPL37/DLD/OGDH/MPST/MMAB/CS/MRPS33/BCKDK/MRPL45/CARS2/HSD17B10/CBR4/TRNT1/DECR1/REXO2	56
CC	GO:0044295	axonal growth cone	8/1488	28/19520	0.000873224	0.00626976	0.00429235	GPM6A/HSP90AB1/COBL/SHTN1/MAPK8IP1/OLFM1/FLNA/FLRT3	8
CC	GO:0009898	cytoplasmic side of plasma membrane	25/1488	167/19520	0.000880638	0.00626976	0.00429235	GNA11/SYAP1/S100A6/GNAI2/SNAP25/CHMP4B/CYTH1/FERMT2/FYN/CYLD/GNAO1/GNAS/LYN/RAC1/KIT/CACNB4/KCNIP1/RGS1/RASA3/ESYT1/GNG7/GNG11/TNK2/PTK2B/STAC2	25
CC	GO:0001725	stress fiber	13/1488	64/19520	0.000932106	0.00649499	0.00444655	FAM107A/PDLIM5/MYH10/ABLIM1/ILK/FERMT2/BAG3/NEBL/MYH7/TRIP6/PALLD/PRICKLE4/MYH14	13
CC	GO:0097517	contractile actin filament bundle	13/1488	64/19520	0.000932106	0.00649499	0.00444655	FAM107A/PDLIM5/MYH10/ABLIM1/ILK/FERMT2/BAG3/NEBL/MYH7/TRIP6/PALLD/PRICKLE4/MYH14	13
CC	GO:0032432	actin filament bundle	14/1488	73/19520	0.00109378	0.0075413	0.00516287	FAM107A/PDLIM5/MYH10/ABLIM1/ILK/FERMT2/BAG3/NEBL/MYH7/FLNA/TRIP6/PALLD/PRICKLE4/MYH14	14
CC	GO:0098800	inner mitochondrial membrane protein complex	22/1488	142/19520	0.00110553	0.00754294	0.00516399	NDUFA4/UQCR10/NDUFC2/NDUFA5/NDUFB4/NDUFV1/COX5A/COX4I1/COX7C/HSPA9/NDUFA10/NDUFB5/NDUFS8/NDUFS7/NDUFB8/SDHD/SDHC/SDHA/NDUFB10/SLC25A6/NDUFS5/NDUFB7	22
CC	GO:0097449	astrocyte projection	6/1488	17/19520	0.00115382	0.00779129	0.00533401	KCNJ10/ADGRG1/ATP1B2/SLC7A11/SLC1A2/SYT4	6
CC	GO:0097386	glial cell projection	8/1488	30/19520	0.00143423	0.00951413	0.00651349	KCNJ10/ADGRG1/ATP1B2/SLC7A11/SLC1A2/FYN/AKR1B1/SYT4	8
CC	GO:0005791	rough endoplasmic reticulum	14/1488	75/19520	0.00143801	0.00951413	0.00651349	RPL4/RPS26/PTGDS/RPL18/RPS23/RPS21/RPL27/SLC7A11/RPN2/RPS28/ARL6IP1/UBA1/RPN1/SRP9	14
CC	GO:0098685	Schaffer collateral - CA1 synapse	13/1488	67/19520	0.00145465	0.0095225	0.00651922	TUBB2B/NEFH/SH3GL2/NPTN/CACNG3/FYN/CPLX1/SYP/GABBR1/BSN/NEFL/RAB11A/STX3	13
CC	GO:0031256	leading edge membrane	25/1488	173/19520	0.00146836	0.0095225	0.00651922	FAM107A/EEF1A1/DDN/PLEKHA1/RPS3/KCNB1/C2CD5/GABRA1/FERMT2/VASP/PSD2/APC2/GABARAPL1/LAMP5/RAC1/EPB41L3/TESC/MPP2/ADORA1/PIP5K1C/ATP6AP2/HPCA/AIF1/PSD3/SH3YL1	25
CC	GO:1905368	peptidase complex	16/1488	92/19520	0.00149513	0.00960107	0.00657301	PSMA7/PSMC5/SPCS1/F3/PSMD11/PAAF1/PSMB3/HSPB1/TADA3/PSMC3/PSMA1/PSMA6/PSMD4/PSMC4/PSMB5/ADRM1	16
CC	GO:1902495	transmembrane transporter complex	40/1488	323/19520	0.0016303	0.0103675	0.0070977	ATP1A3/CALM1/SNAP25/ATP1A2/ATP1B1/SCN11A/GRIA2/KCNB1/SCN2A/ATP1A1/GABRA1/CACNG3/ATP1B3/ATP1B2/FKBP1A/CNIH2/GRIN1/SCN1A/CHRNA5/CALM3/CLIC4/VAMP2/STX1A/FKBP1B/KCND2/CALM2/CACNB4/ABHD6/CACNA1C/SLC9A1/KCNIP1/GLRB/KCNA5/NOS1AP/FXYD1/TTYH2/PTK2B/NLGN1/CPT1C/ABCA2	40
CC	GO:1905369	endopeptidase complex	13/1488	68/19520	0.00167528	0.010551	0.00722338	PSMA7/PSMC5/PSMD11/PAAF1/PSMB3/HSPB1/PSMC3/PSMA1/PSMA6/PSMD4/PSMC4/PSMB5/ADRM1	13
CC	GO:0044291	cell-cell contact zone	13/1488	69/19520	0.00192287	0.0119853	0.00820532	YWHAH/GJA1/ATP1A2/ATP1B1/SCN2A/ATP1A1/OPALIN/CDH2/ANK3/SLC9A1/KCNA5/FXYD1/VAMP5	13
CC	GO:1904949	ATPase complex	17/1488	103/19520	0.00195035	0.0119853	0.00820532	ATP1A3/CHD5/ZBTB7A/ATP1A2/ATP1B1/ATP1A1/ATP1B3/ATP1B2/GATAD2A/DMAP1/SMARCA4/RBBP7/DPF3/ACTL6B/FXYD1/ACTR6/ABCA2	17
CC	GO:0044292	dendrite terminus	5/1488	13/19520	0.00195791	0.0119853	0.00820532	HSP90AB1/MAP2/COBL/MAPK8IP1/SLC32A1	5
CC	GO:0060076	excitatory synapse	10/1488	46/19520	0.00207435	0.0125805	0.00861279	GRIA2/CACNG3/GRIN1/SYP/SYT1/CALB2/NLGN4X/BSN/PALLD/NLGN1	10
CC	GO:1990351	transporter complex	41/1488	338/19520	0.0021202	0.0127406	0.0087224	ATP1A3/CALM1/SNAP25/ATP1A2/ATP1B1/SCN11A/GRIA2/KCNB1/SCN2A/ATP1A1/GABRA1/CACNG3/ATP1B3/ATP1B2/FKBP1A/CNIH2/GRIN1/SCN1A/CHRNA5/CALM3/CLIC4/VAMP2/STX1A/FKBP1B/KCND2/CALM2/CACNB4/ABHD6/CACNA1C/SLC9A1/KCNIP1/GLRB/PEX14/KCNA5/NOS1AP/FXYD1/TTYH2/PTK2B/NLGN1/CPT1C/ABCA2	41
CC	GO:0030018	Z disc	19/1488	122/19520	0.00219633	0.0129206	0.00884561	CSRP1/FBXL22/PDLIM5/HDAC4/FKBP1A/SCN1A/BAG3/NEBL/FKBP1B/MYH7/FLNA/CACNA1C/ANK3/KCNA5/PALLD/PRICKLE4/NOS1AP/HOMER1/KRT19	19
CC	GO:0005884	actin filament	18/1488	113/19520	0.00219643	0.0129206	0.00884561	ACTB/PDLIM5/ARPC3/MARK2/COBL/FYN/APC2/RAC1/DUSP22/FLNA/EHBP1L1/PALLD/KPTN/PRICKLE4/COTL1/WIPF2/AIF1/ANXA1	18
CC	GO:0030669	clathrin-coated endocytic vesicle membrane	9/1488	39/19520	0.00221631	0.0129206	0.00884561	APOE/SH3GL2/HLA-DPB1/AP2B1/SGIP1/AP2S1/CLTC/LDLR/CD74	9
CC	GO:0016328	lateral plasma membrane	12/1488	62/19520	0.00223361	0.0129206	0.00884561	PPP2R1A/MARK2/ATP1B1/KCNB1/ATP1A1/ATP1B2/SNTA1/FZD3/ANK3/CLDN15/PTPRO/ANXA1	12
CC	GO:0043198	dendritic shaft	8/1488	32/19520	0.00224878	0.0129206	0.00884561	MAP2/CNIH2/NSF/FLNA/HTR2A/MPP2/PRKAR2B/NLGN1	8
CC	GO:0043202	lysosomal lumen	16/1488	96/19520	0.0023566	0.0134224	0.00918913	SDC3/TPP1/RNASET2/CTSB/DCN/BGN/CTSA/BCAN/OGN/NPC2/PRELP/SCARB2/GALC/CTSL/CD74/PDGFRB	16
CC	GO:0031968	organelle outer membrane	29/1488	220/19520	0.00271077	0.0153065	0.010479	GJA1/UBC/UBA52/LPIN1/BNIP3/UBB/HSPA9/TOMM34/COASY/MAOA/BCL2L2/LETMD1/RHOT2/TOMM40L/FIS1/RSAD2/PPP1CC/MGST1/MFN2/PPP2R2B/VDAC2/SOX10/EMD/ACSL5/OPA1/CPTP/IFI27/SMPD4/CPT1C	29
CC	GO:0005681	spliceosomal complex	26/1488	191/19520	0.0028122	0.015719	0.0107614	SRRM1/TRA2A/U2AF1/YBX1/PDCD7/SNRNP70/SNRPD3/SART1/SF1/RBM3/CWF19L2/ADAR/TTF2/SNU13/PRKRIP1/SREK1/SNRNP25/HNRNPM/PHF5A/GPKOW/RNF113A/HNRNPH3/PRPF6/GCFC2/DDX5/TRA2B	26
CC	GO:0031674	I band	20/1488	134/19520	0.00285228	0.015719	0.0107614	CSRP1/FBXL22/PDLIM5/HDAC4/FKBP1A/FERMT2/SCN1A/BAG3/NEBL/FKBP1B/MYH7/FLNA/CACNA1C/ANK3/KCNA5/PALLD/PRICKLE4/NOS1AP/HOMER1/KRT19	20
CC	GO:0060077	inhibitory synapse	5/1488	14/19520	0.00285583	0.015719	0.0107614	NPTN/GAD2/NLGN4X/SLC32A1/GAD1	5
CC	GO:0030666	endocytic vesicle membrane	23/1488	163/19520	0.0030299	0.0165382	0.0113222	CAMK2A/APOE/ATP6V0C/ATP6V0A1/UBC/UBA52/RAB10/GRIA2/SH3GL2/HLA-DPB1/CACNG3/UBB/ATP6V0B/AP2B1/SGIP1/AP2S1/B2M/TAP1/SCARB2/CLTC/LDLR/CD74/TLR2	23
CC	GO:0019867	outer membrane	29/1488	222/19520	0.0030982	0.0167713	0.0114818	GJA1/UBC/UBA52/LPIN1/BNIP3/UBB/HSPA9/TOMM34/COASY/MAOA/BCL2L2/LETMD1/RHOT2/TOMM40L/FIS1/RSAD2/PPP1CC/MGST1/MFN2/PPP2R2B/VDAC2/SOX10/EMD/ACSL5/OPA1/CPTP/IFI27/SMPD4/CPT1C	29
CC	GO:0033176	proton-transporting V-type ATPase complex	7/1488	27/19520	0.00336984	0.0180189	0.0123359	ATP6V0C/ATP6V1B2/ATP6V0A1/ATP6V1D/ATP6V0B/ATP6V1H/ATP6AP2	7
CC	GO:0005766	primary lysosome	22/1488	155/19520	0.00342625	0.0180189	0.0123359	ATP6V0C/DYNC1H1/NDUFC2/SERPINA3/TTR/FABP5/PA2G4/TUBB4B/RNASET2/STOM/CTSA/NPC2/GCA/MGST1/CAP1/DDOST/CREG1/STX3/PRCP/TRAPPC1/C3/NAPRT	22
CC	GO:0042582	azurophil granule	22/1488	155/19520	0.00342625	0.0180189	0.0123359	ATP6V0C/DYNC1H1/NDUFC2/SERPINA3/TTR/FABP5/PA2G4/TUBB4B/RNASET2/STOM/CTSA/NPC2/GCA/MGST1/CAP1/DDOST/CREG1/STX3/PRCP/TRAPPC1/C3/NAPRT	22
CC	GO:0045334	clathrin-coated endocytic vesicle	11/1488	57/19520	0.00343872	0.0180189	0.0123359	APOE/SH3GL2/CEMIP/HLA-DPB1/AP2B1/SGIP1/AP2S1/CPNE6/CLTC/LDLR/CD74	11
CC	GO:0035578	azurophil granule lumen	15/1488	91/19520	0.00354296	0.0184178	0.012609	DYNC1H1/SERPINA3/TTR/FABP5/PA2G4/TUBB4B/RNASET2/CTSA/NPC2/GCA/CAP1/CREG1/TRAPPC1/C3/NAPRT	15
CC	GO:0005788	endoplasmic reticulum lumen	37/1488	306/19520	0.00357691	0.0184478	0.0126296	CLU/APOE/SPP1/ARSK/SPARCL1/CST3/COL16A1/CHGB/RNASET2/VWA1/MANF/SDF2L1/COLGALT2/B2M/ERAP2/TIMP1/CANX/IGFBP4/CDH2/GANAB/BACE1/MFGE8/COL6A2/CERCAM/FOXRED2/SCG2/WFS1/IGFBP5/CTSZ/ERO1A/STS/COL4A5/PDGFA/PTPRN2/CALU/C3/ERLEC1	37
CC	GO:0045211	postsynaptic membrane	33/1488	265/19520	0.00363459	0.0185989	0.012733	SYAP1/DDN/PRRT2/NRGN/CLSTN1/GRIA2/KCNB1/FAIM2/NPTN/GABRA1/RPH3A/CACNG3/SNTA1/CNIH2/SLITRK2/GRIN1/CDH2/CHRNA5/KCND2/GABBR1/ABHD6/CACNA1C/ANK3/HTR2A/GLRB/ADORA1/NLGN4X/FLRT3/LRFN3/GPHN/ATP6AP2/NLGN1/CNKSR2	33
CC	GO:0005741	mitochondrial outer membrane	26/1488	195/19520	0.00373705	0.0188796	0.0129252	GJA1/UBC/UBA52/LPIN1/BNIP3/UBB/HSPA9/TOMM34/COASY/MAOA/BCL2L2/LETMD1/RHOT2/TOMM40L/FIS1/RSAD2/PPP1CC/MGST1/MFN2/PPP2R2B/VDAC2/SOX10/ACSL5/OPA1/IFI27/CPT1C	26
CC	GO:0031300	intrinsic component of organelle membrane	46/1488	402/19520	0.0037471	0.0188796	0.0129252	RAB3A/RTN1/CLSTN1/SCD/BSCL2/SARAF/BNIP3/HLA-DPB1/SPCS1/HSPA9/RTN4/SLC30A3/SYP/RHOT2/B2M/CANX/RAB5B/TAP1/GALNT2/ERGIC3/STX1A/FIS1/SV2A/SYT1/SFXN5/MFN2/ARL6IP1/WFS1/ETFDH/MPC1/ITM2B/ELOVL4/TMCO1/SYNPR/ESYT1/FICD/RAB26/PTPRN2/EMC4/CD74/FURIN/VAMP5/CPT1C/SYT4/SLC32A1/EMC10	46
CC	GO:0043209	myelin sheath	9/1488	42/19520	0.00379394	0.0189697	0.0129869	PLP1/PMP2/TUBA1A/CALM1/GDI1/PLLP/GNAO1/CALM3/AKR1B1	9
CC	GO:0005838	proteasome regulatory particle	6/1488	21/19520	0.0038854	0.0192798	0.0131992	PSMC5/PSMD11/PSMC3/PSMD4/PSMC4/ADRM1	6
CC	GO:0005665	RNA polymerase II, core complex	5/1488	15/19520	0.00401733	0.019637	0.0134437	POLR2I/POLR2F/POLR2L/POLR2J/POLR2A	5
CC	GO:0098554	cytoplasmic side of endoplasmic reticulum membrane	5/1488	15/19520	0.00401733	0.019637	0.0134437	RPS26/RPL27/DNAJA1/EPM2AIP1/RPS28	5
CC	GO:0030125	clathrin vesicle coat	7/1488	28/19520	0.00420204	0.0202378	0.013855	AP2B1/SGIP1/AP2S1/AP1G2/NECAP1/CLTC/EPN1	7
CC	GO:0031045	dense core granule	7/1488	28/19520	0.00420204	0.0202378	0.013855	CHGA/NCS1/SOD1/NPY/SYT1/SCG2/SYT4	7
CC	GO:0005743	mitochondrial inner membrane	54/1488	493/19520	0.00451608	0.0215915	0.0147818	CLU/IFI6/NDUFA4/UQCR10/ACADVL/NDUFC2/NDUFA5/RPS3/NDUFB4/MTCH1/NDUFV1/COX5A/COX4I1/COX7C/MRPL24/HSPA9/MRPL57/NDUFA10/NDUFB5/SLC25A18/COX8A/NDUFS8/EFHD1/NDUFS7/MRPL16/MRPS23/NDUFB8/LYN/MRPL17/RSAD2/SDHD/SFXN5/SDHC/SPHK2/SDHA/ETFDH/MPC1/MRS2/SLC25A29/MRPS6/MRPL41/MRPS36/ACAD11/SLC25A39/NDUFB10/MRPL37/OPA1/HIGD1A/SLC25A6/NDUFS5/MRPS33/STOML2/MRPL45/NDUFB7	54
CC	GO:0000118	histone deacetylase complex	13/1488	77/19520	0.00519225	0.0246444	0.0168718	RERE/HINT1/HDAC4/CHD5/ZBTB7A/MORF4L1/GATAD2A/DMAP1/RBBP7/SATB2/SAP30/KDM3A/ACTR6	13
CC	GO:0071782	endoplasmic reticulum tubular network	6/1488	23/19520	0.00633874	0.0298696	0.0204491	REEP5/RAB10/REEP2/RTN4/REEP1/EMD	6
CC	GO:0031301	integral component of organelle membrane	42/1488	371/19520	0.00652839	0.0305436	0.0209105	RTN1/CLSTN1/SCD/BSCL2/SARAF/BNIP3/HLA-DPB1/SPCS1/HSPA9/RTN4/SLC30A3/SYP/RHOT2/B2M/CANX/TAP1/GALNT2/ERGIC3/STX1A/FIS1/SV2A/SYT1/SFXN5/ARL6IP1/WFS1/ETFDH/MPC1/ITM2B/ELOVL4/TMCO1/SYNPR/ESYT1/FICD/PTPRN2/EMC4/CD74/FURIN/VAMP5/CPT1C/SYT4/SLC32A1/EMC10	42
CC	GO:0099523	presynaptic cytosol	4/1488	11/19520	0.00718118	0.0333594	0.0228382	NCS1/PRKCB/PRKCG/CALB1	4
CC	GO:0022624	proteasome accessory complex	6/1488	24/19520	0.00791613	0.0362592	0.0248235	PSMC5/PSMD11/PSMC3/PSMD4/PSMC4/ADRM1	6
CC	GO:0036019	endolysosome	6/1488	24/19520	0.00791613	0.0362592	0.0248235	CTSB/AP2B1/AP2S1/CLTC/LDLR/CTSL	6
CC	GO:0030120	vesicle coat	10/1488	55/19520	0.00798173	0.0363058	0.0248554	AP2B1/SGIP1/AP2S1/AP1G2/SEC31A/NECAP1/PEF1/CLTC/SAR1A/EPN1	10
CC	GO:0005938	cell cortex	35/1488	301/19520	0.00824788	0.0370815	0.0253865	SCIN/EEF1A1/ADD3/DYNC1H1/PRKCB/PVALB/RHOBTB3/RAB10/COBL/C2CD5/MYH10/CABP1/FERMT2/EXOC6B/ENO1/CDH2/PARD6A/SPTAN1/CALB1/RAC1/FRMPD1/FLNA/CAP1/CALB2/RHOG/CTSZ/EMD/MAPRE1/BSN/TRIP10/COTL1/LANCL2/PTK2B/KRT19/GAD1	35
CC	GO:0030176	integral component of endoplasmic reticulum membrane	21/1488	157/19520	0.0082655	0.0370815	0.0253865	RTN1/SCD/BSCL2/SARAF/HLA-DPB1/SPCS1/RTN4/B2M/CANX/TAP1/ERGIC3/ARL6IP1/WFS1/ELOVL4/TMCO1/ESYT1/FICD/EMC4/CD74/CPT1C/EMC10	21
CC	GO:0031941	filamentous actin	7/1488	32/19520	0.00914695	0.0407568	0.0279026	PDLIM5/ARPC3/APC2/DUSP22/EHBP1L1/KPTN/PRICKLE4	7
CC	GO:0043034	costamere	5/1488	18/19520	0.00946204	0.0415949	0.0284764	SYNM/ANK3/FXR1/HOMER1/KRT19	5
CC	GO:0097440	apical dendrite	5/1488	18/19520	0.00946204	0.0415949	0.0284764	CLU/MAP2/FLNA/PPARGC1A/PTK2B	5
CC	GO:0016234	inclusion body	12/1488	74/19520	0.00977875	0.0427005	0.0292333	MT3/CLU/HSPA1B/NEFH/PSMC5/PRNP/HSP90AB1/EEF2/BAG3/SQSTM1/TRIM37/PSMC4	12
CC	GO:0005751	mitochondrial respiratory chain complex IV	4/1488	12/19520	0.0101292	0.043082	0.0294945	NDUFA4/COX5A/COX4I1/COX7C	4
CC	GO:0008540	proteasome regulatory particle, base subcomplex	4/1488	12/19520	0.0101292	0.043082	0.0294945	PSMC5/PSMC3/PSMD4/PSMC4	4
CC	GO:0042583	chromaffin granule	4/1488	12/19520	0.0101292	0.043082	0.0294945	CHGA/CLU/SYT1/CTSL	4
CC	GO:0099059	integral component of presynaptic active zone membrane	4/1488	12/19520	0.0101292	0.043082	0.0294945	GPM6A/NPTN/CDH2/LRFN3	4
CC	GO:0043204	perikaryon	20/1488	151/19520	0.0108614	0.0457345	0.0313104	SYAP1/DDN/ENO2/GAP43/DIP2B/CCK/RACK1/KCNB1/PAM/PTPRN/SHTN1/OLFM1/CPLX1/CPNE6/CRMP1/KCND2/FLNA/CACNA1C/NDN/HPCA	20
CC	GO:0005875	microtubule associated complex	21/1488	161/19520	0.0108925	0.0457345	0.0313104	PEA15/DYNC1H1/HAUS2/MAP2/DYNLL1/KIFC2/DYNC1LI2/SHTN1/YWHAE/RABGAP1/KIFC3/DYNLRB1/KIF3B/DYNC1I1/DNAL4/CLIP2/EML1/NDE1/EML2/KIFAP3/KLC2	21
CC	GO:1904115	axon cytoplasm	10/1488	58/19520	0.0115828	0.0481739	0.0329804	DYNC1H1/CALY/SOD1/DYNLL1/MAPK8IP3/AP3S1/HSPB1/KIF3B/OPA1/NEFL	10
CC	GO:0030134	COPII-coated ER to Golgi transport vesicle	14/1488	94/19520	0.0116206	0.0481739	0.0329804	GOLGA2/HLA-DPB1/CNIH2/SCAP/B2M/SEC31A/ERGIC3/LMAN2L/CTSZ/CD59/PEF1/CD74/SAR1A/YIPF6	14
CC	GO:0036464	cytoplasmic ribonucleoprotein granule	28/1488	234/19520	0.0117497	0.0484029	0.0331372	ACTB/CNOT2/TUBA1A/EID1/RPS4X/APOBEC3A/RPS6/YBX1/LARP1/PUM1/PCBP1/PAN2/ATXN2/PSMC3/DYNC1I1/RAC1/SNCAIP/BTBD2/ROCK2/DDX1/SQSTM1/PSMA6/NUFIP2/HABP4/FXR1/PNRC2/TNRC6B/HENMT1	28
CC	GO:0030867	rough endoplasmic reticulum membrane	6/1488	26/19520	0.0118835	0.0486481	0.0333051	RPS26/RPL27/RPS28/ARL6IP1/UBA1/SRP9	6
CC	GO:0030863	cortical cytoskeleton	15/1488	104/19520	0.0122425	0.0498065	0.0340981	EEF1A1/PRKCB/PVALB/COBL/CDH2/SPTAN1/CALB1/FLNA/CAP1/CALB2/MAPRE1/BSN/COTL1/LANCL2/KRT19	15
MF	GO:0003735	structural constituent of ribosome	60/1468	180/18337	1.44e-22	1.4832e-19	1.33541e-19	RPL31/RPL38/RPL19/RPL4/RPL24/RPL11/RPS14/RPS26/RPL5/RPL35/RPL41/RPS24/RPS25/RPL18A/RPS4Y1/RPL37A/RPL18/RPS4X/UBA52/RPS27/RPSA/RPL23A/RPS6/RPLP1/RPS10/RPS3/RPS23/RPS21/RPS3A/RPS27L/MRPL24/RPS20/RPLP2/RPL27/RPS8/RPL26/MRPL57/RPS7/RPL3/RPL21/RPL36/RPL10A/MRPL16/MRPS23/RPL13A/RPL9/RPL30/MRPL17/RPS28/RPL27A/MRPS6/MRPL41/MRPS36/RPS18/MRPL37/RPS9/RPL17/RPS19/RPL23/MRPS33	60
MF	GO:0044389	ubiquitin-like protein ligase binding	54/1468	312/18337	5.30463e-08	2.73189e-05	2.45968e-05	CLU/ATP6V0C/BLZF1/HSPA1B/RPL11/CKB/RPL5/SPOP/HSP90AB1/TMBIM6/ISG15/UBC/UBA52/GPR37/CDK5RAP3/XRCC5/STAT2/PTPRN/PA2G4/HSPA6/DBT/UBB/HSPA9/PIAS4/RTN4/UCHL1/NEDD8/TUBA1B/DNAJA1/NFKBIA/BAG6/YWHAE/TPI1/SMAD3/GABARAPL1/LYN/FOXO1/SNCAIP/MFN2/WFS1/SQSTM1/RNF40/TRIM37/PPARGC1A/SUMO3/CEBPB/UBE2J1/POLR2A/RPL23/PRKAR2B/NAE1/RALA/TNK2/PTK2B	54
MF	GO:0001540	amyloid-beta binding	22/1468	84/18337	4.75739e-07	0.000161465	0.000145377	CLU/ATP1A3/APOE/PRNP/CST3/ITM2C/CLSTN1/FBXO2/GRIA2/PFDN5/ITM2A/GRIN1/PFDN2/C1QA/BACE1/ITM2B/LDLR/CD74/APBB3/TLR2/NLGN1/SORL1	22
MF	GO:0031625	ubiquitin protein ligase binding	49/1468	293/18337	6.2705e-07	0.000161465	0.000145377	CLU/ATP6V0C/BLZF1/HSPA1B/RPL11/CKB/RPL5/SPOP/HSP90AB1/TMBIM6/ISG15/UBC/UBA52/GPR37/XRCC5/PA2G4/HSPA6/DBT/UBB/HSPA9/PIAS4/RTN4/UCHL1/NEDD8/TUBA1B/DNAJA1/NFKBIA/BAG6/YWHAE/TPI1/SMAD3/GABARAPL1/LYN/FOXO1/SNCAIP/MFN2/WFS1/SQSTM1/RNF40/TRIM37/PPARGC1A/UBE2J1/POLR2A/RPL23/PRKAR2B/NAE1/RALA/TNK2/PTK2B	49
MF	GO:0003955	NAD(P)H dehydrogenase (quinone) activity	15/1468	48/18337	2.87885e-06	0.000593042	0.00053395	NDUFA4/NDUFC2/NDUFA5/NDUFB4/NDUFV1/NDUFA10/NDUFB5/NDUFS8/NDUFS7/NDUFB8/NDUFB10/NDUFS5/NQO1/CBR4/NDUFB7	15
MF	GO:0009055	electron transfer activity	28/1468	138/18337	3.87512e-06	0.000665229	0.000598944	NDUFA4/UQCR10/NDUFC2/PHGDH/NDUFA5/NDUFB4/NDUFV1/COX5A/COX4I1/COX7C/NDUFA10/NDUFB5/COX8A/NDUFS8/NDUFS7/QDPR/ALDH2/NDUFB8/ALDH4A1/SDHD/SDHC/SDHA/ETFDH/AKR7A2/NDUFB10/NDUFS5/AKR1B1/NDUFB7	28
MF	GO:0005200	structural constituent of cytoskeleton	23/1468	103/18337	5.23517e-06	0.000770318	0.000693562	GFAP/ACTB/TUBB2B/NEFH/TUBA1A/ARPC3/ADD3/TUBB2A/VIM/TUBA1C/TUBGCP4/TUBB4B/TUBA1B/SPTAN1/SYNM/EPB41L3/ADD1/ANK3/NEFL/ARPC1B/ACTL6B/TLN2/KRT19	23
MF	GO:0019843	rRNA binding	17/1468	64/18337	7.62243e-06	0.000981388	0.0008836	RPL11/RPS14/RPL5/RPS4Y1/RPS4X/RPL23A/RPS3/EEF2/RPL3/MRPL16/RPL9/SBDS/MRPS6/RPS18/RPS9/RPL23/RPF2	17
MF	GO:0017075	syntaxin-1 binding	10/1468	26/18337	1.68993e-05	0.00193403	0.00174132	PRRT2/SNAP25/CPLX1/SYP/NSF/VAMP2/SYT1/RNF40/SYNPR/SYT4	10
MF	GO:0045296	cadherin binding	49/1468	332/18337	2.22347e-05	0.00216875	0.00195265	GOLGA2/RPL24/PDLIM5/PFKP/RPS26/EEF1G/HSP90AB1/EEF1D/MARK2/SERBP1/RPL23A/ARGLU1/RAB10/FASN/RACK1/CHMP4B/LARP1/SHTN1/RTN4/EEF2/ARHGAP1/ENO1/CHMP5/VASP/PCBP1/CAST/YWHAE/CDH2/PTPN11/LRRFIP1/BAG3/SPTAN1/EIF2S3/MPRIP/FLNA/PAK6/ADD1/ANK3/RAN/EMD/MAPRE1/LDHA/DNAJB1/SH3GLB2/KLC2/PTPRO/PLIN3/ANXA1/GOLGA3	49
MF	GO:0031386	protein tag	7/1468	13/18337	2.31614e-05	0.00216875	0.00195265	ISG15/UBC/UBA52/UBB/NEDD8/UBL5/SUMO3	7
MF	GO:0003954	NADH dehydrogenase activity	13/1468	45/18337	3.37795e-05	0.0024852	0.00223757	NDUFA4/NDUFC2/NDUFA5/NDUFB4/NDUFV1/NDUFA10/NDUFB5/NDUFS8/NDUFS7/NDUFB8/NDUFB10/NDUFS5/NDUFB7	13
MF	GO:0008137	NADH dehydrogenase (ubiquinone) activity	13/1468	45/18337	3.37795e-05	0.0024852	0.00223757	NDUFA4/NDUFC2/NDUFA5/NDUFB4/NDUFV1/NDUFA10/NDUFB5/NDUFS8/NDUFS7/NDUFB8/NDUFB10/NDUFS5/NDUFB7	13
MF	GO:0050136	NADH dehydrogenase (quinone) activity	13/1468	45/18337	3.37795e-05	0.0024852	0.00223757	NDUFA4/NDUFC2/NDUFA5/NDUFB4/NDUFV1/NDUFA10/NDUFB5/NDUFS8/NDUFS7/NDUFB8/NDUFB10/NDUFS5/NDUFB7	13
MF	GO:0031720	haptoglobin binding	6/1468	10/18337	4.12851e-05	0.00283491	0.00255243	HBB/HBD/HBA1/HBA2/HBQ1/HBG1	6
MF	GO:0016655	oxidoreductase activity, acting on NAD(P)H, quinone or similar compound as acceptor	15/1468	60/18337	5.60961e-05	0.00343132	0.00308941	NDUFA4/NDUFC2/NDUFA5/NDUFB4/NDUFV1/NDUFA10/NDUFB5/NDUFS8/NDUFS7/NDUFB8/NDUFB10/NDUFS5/NQO1/CBR4/NDUFB7	15
MF	GO:0033218	amide binding	54/1468	391/18337	5.66334e-05	0.00343132	0.00308941	CLU/ATP1A3/APOE/PRNP/HSP90AB1/SRP14/TPP1/CST3/RAMP1/ACADVL/PPIAL4A/GPR37/ITM2C/CLSTN1/FBXO2/TMEM158/PPP3R1/FASN/GRIA2/CEMIP/KPNA6/CLIP3/HLA-DPB1/PFDN5/FKBP1A/CABP1/AP2B1/CCKBR/ITM2A/GRIN1/ERAP2/NFKBIA/TAP1/PFDN2/C1QA/TOMM40L/GPR1/BACE1/FKBP1B/MGST1/GLTP/ITM2B/VDAC2/DLD/CPTP/PEX5L/LDLR/CD74/FURIN/APBB3/TLR2/NLGN1/SORL1/SSTR2	54
MF	GO:0042277	peptide binding	45/1468	315/18337	0.000103844	0.00594219	0.0053501	CLU/ATP1A3/APOE/PRNP/HSP90AB1/SRP14/TPP1/CST3/RAMP1/PPIAL4A/GPR37/ITM2C/CLSTN1/FBXO2/TMEM158/PPP3R1/GRIA2/CEMIP/KPNA6/HLA-DPB1/PFDN5/CABP1/AP2B1/CCKBR/ITM2A/GRIN1/ERAP2/NFKBIA/TAP1/PFDN2/C1QA/TOMM40L/GPR1/BACE1/MGST1/ITM2B/PEX5L/LDLR/CD74/FURIN/APBB3/TLR2/NLGN1/SORL1/SSTR2	45
MF	GO:0035256	G protein-coupled glutamate receptor binding	6/1468	12/18337	0.000157825	0.00855577	0.00770325	CALM1/PRNP/FYN/NECAB2/CALM3/HOMER1	6
MF	GO:0035254	glutamate receptor binding	11/1468	41/18337	0.000278197	0.0143272	0.0128996	CAMK2A/CALM1/PRNP/CACNG3/FYN/NECAB2/GNAS/NSF/CALM3/SQSTM1/HOMER1	11
MF	GO:0015631	tubulin binding	49/1468	368/18337	0.000295734	0.014505	0.0130597	GOLGA2/NEFH/DIP2B/PRNP/GJA1/BEX4/TUBGCP4/MAP6D1/MAP2/RPS3/STMN3/KIFC2/FEZ1/CLIP3/CCDC88B/REEP2/TBCA/MAST1/GAPDH/SGIP1/FYN/APC2/GABARAPL1/RABGAP1/MTUS1/KIFC3/LYN/KIF3B/DYNC1I1/CLIP2/MAST2/EML1/NDE1/VPS41/SBDS/S100A8/REEP1/PEX14/PPARGC1A/EMD/MAPRE1/TBCE/JAKMIP1/PSRC1/OPA1/NDN/EML2/RAB11A/TPPP	49
MF	GO:0051539	4 iron, 4 sulfur cluster binding	11/1468	42/18337	0.000349932	0.0158468	0.0142677	NDUFV1/NDUFS8/ACO1/NDUFS7/ISCU/RSAD2/ETFDH/RSAD1/DDX11/MUTYH/TYW1	11
MF	GO:0051117	ATPase binding	17/1468	85/18337	0.000353859	0.0158468	0.0142677	RAB3A/SNX10/ATP6V1E1/ATP6V0A1/METTL21A/ATP1B1/ATP1B3/ATP1B2/SNTA1/SDF2L1/S100A1/RAC1/WFS1/SNU13/BRSK2/DNAJB1/RALA	17
MF	GO:0019208	phosphatase regulator activity	19/1468	101/18337	0.000372737	0.0159966	0.0144027	PTN/CALM1/PPP2R1A/SET/PPP3R1/RCAN2/PPP2R2C/PPP2R5B/CALM3/PPP4R1/CALM2/PPP2R3B/TESC/PPP2R2B/PPP1R2/GTF2F1/PPP2R5E/PHACTR1/RCAN1	19
MF	GO:0016209	antioxidant activity	17/1468	86/18337	0.000408685	0.0165747	0.0149231	MT3/APOE/HBB/HBD/SOD1/HP/HBA1/HBA2/MGST3/HBQ1/GPX4/GSTK1/MGST1/GPX3/HBG1/NQO1/SOD3	17
MF	GO:0005344	oxygen carrier activity	6/1468	14/18337	0.000445853	0.0165747	0.0149231	HBB/HBD/HBA1/HBA2/HBQ1/HBG1	6
MF	GO:0050998	nitric-oxide synthase binding	6/1468	14/18337	0.000445853	0.0165747	0.0149231	ACTB/CALM1/SNTA1/CALM3/NOS1AP/CD74	6
MF	GO:0016835	carbon-oxygen lyase activity	16/1468	79/18337	0.000450574	0.0165747	0.0149231	ENO2/ETNPPL/CA11/CYP1B1/RPS3/XRCC5/FASN/FAHD2A/ENO1/ACO1/CA10/TPI1/ECHS1/CA2/PCBD1/CA8	16
MF	GO:0019888	protein phosphatase regulator activity	17/1468	87/18337	0.000470688	0.0167175	0.0150518	PTN/CALM1/PPP2R1A/SET/PPP3R1/RCAN2/PPP2R2C/PPP2R5B/CALM3/PPP4R1/CALM2/PPP2R3B/PPP2R2B/PPP1R2/PPP2R5E/PHACTR1/RCAN1	17
MF	GO:0005516	calmodulin binding	30/1468	198/18337	0.000523069	0.0173975	0.015664	CAMK2A/EEF1A1/RGS4/GAP43/ADD3/NRGN/MAP6D1/MAP2/CAMK1D/PPP3R1/MYH10/PCNT/SNTA1/GRIN1/SPTAN1/VAMP2/SYT1/CAMKK2/MYH7/MARCKSL1/ADD1/CACNA1C/SLC9A1/ARPP21/RGS1/ADCY3/PCP4/PLCB1/AEBP1/MYH14	30
MF	GO:0016903	oxidoreductase activity, acting on the aldehyde or oxo group of donors	11/1468	44/18337	0.000540506	0.0173975	0.015664	HSD17B12/PDHB/GAPDH/ALDH2/ALDH4A1/ALDH5A1/OGDHL/DLD/OGDH/ALDH1A3/AKR1B1	11
MF	GO:0048156	tau protein binding	11/1468	44/18337	0.000540506	0.0173975	0.015664	ACTB/CLU/APOE/HSP90AB1/MARK2/MAP2/FYN/PPP2CA/ROCK2/DYRK1A/BRSK2	11
MF	GO:0030957	Tat protein binding	5/1468	10/18337	0.000584588	0.0182462	0.0164281	ACTB/DNAJA1/GABARAPL1/NPM1/SMARCA4	5
MF	GO:0003924	GTPase activity	43/1468	322/18337	0.000633873	0.0192026	0.0172892	RAB3A/GNA11/TUBB2B/EEF1A1/TUBA1A/RGS4/TUBB2A/MRAS/TUBA1C/RGS11/GNAI2/RHOBTB3/EEF1A2/RAB10/RAP1GAP/RRAGC/TUBB4B/RAB15/RAB40C/RASEF/EEF2/TUBA1B/RRAGD/RHOT2/GNAO1/RAB5B/GNAS/EIF2S3/RAC1/MFN2/RHOG/RAN/RASL10B/RGS6/RGS1/OPA1/RAB26/RAB11A/HRAS/GNG11/SAR1A/RALA/TPPP	43
MF	GO:0043177	organic acid binding	20/1468	114/18337	0.000678931	0.01998	0.0179891	HBB/HBD/CRABP1/PAM/FABP5/HBA1/HBA2/DBT/GAD2/HBQ1/GRIN1/P4HTM/S100A8/FABP3/GLRB/STX3/HBG1/PHYH/GAD1/NR2F2	20
MF	GO:0048027	mRNA 5'-UTR binding	8/1468	26/18337	0.000698454	0.0199835	0.0179923	RPS14/RPL5/RPL41/RPS3A/MYH10/LARP1/RPL26/RPS7	8
MF	GO:0043021	ribonucleoprotein complex binding	22/1468	134/18337	0.000951858	0.025732	0.023168	RPSA/EIF1/RPLP1/EIF3C/RACK1/SPCS1/LARP1/EEF2/SRP72/LETMD1/RPN2/BAG6/MTIF3/EIF1B/RBM3/NPM1/SBDS/PRPF6/LTN1/PIM1/DDX5/SRP9	22
MF	GO:0005080	protein kinase C binding	12/1468	54/18337	0.000962041	0.025732	0.023168	PDLIM5/HINT1/PRKCB/RACK1/FEZ1/YWHAG/HSPB1/PARD6A/NELL1/FLNA/SQSTM1/NELL2	12
MF	GO:0061629	RNA polymerase II-specific DNA-binding transcription factor binding	37/1468	271/18337	0.000974318	0.025732	0.023168	ACTB/YWHAH/JUND/PRKCB/RBPJ/ZBTB7A/CDK5RAP3/FOXP1/BEX1/DUSP26/TACC1/ARNT2/DNAJA1/NFKBIA/HSPB1/SMAD3/TADA3/GABARAPL1/KLF4/HMGN3/DMAP1/NPM1/MED25/PSMA6/SMARCA4/TRIP6/PPARGC1A/COMMD7/CEBPB/IFI27/PRPF6/WBP2/KDM3A/DDX5/ID2/TTC8/HES6	37
MF	GO:0008097	5S rRNA binding	5/1468	11/18337	0.0010012	0.0257808	0.023212	RPL11/RPL5/EEF2/RPL3/RPF2	5
MF	GO:0019211	phosphatase activator activity	6/1468	16/18337	0.00103395	0.0259749	0.0233867	CALM1/PPP2R5B/CALM3/CALM2/GTF2F1/PPP2R5E	6
MF	GO:0097718	disordered domain specific binding	9/1468	34/18337	0.00110018	0.0269807	0.0242922	CALM1/HSP90AB1/GJA1/GAPDH/BCL2L2/FYN/CALM3/CALM2/CLTC	9
MF	GO:0044769	ATPase activity, coupled to transmembrane movement of ions, rotational mechanism	7/1468	22/18337	0.00121084	0.0283446	0.0255203	ATP6V0C/ATP6V1B2/ATP6V1E1/ATP6V0A1/ATP6V1D/ATP6V0B/ATP6V1H	7
MF	GO:0046961	proton-transporting ATPase activity, rotational mechanism	7/1468	22/18337	0.00121084	0.0283446	0.0255203	ATP6V0C/ATP6V1B2/ATP6V1E1/ATP6V0A1/ATP6V1D/ATP6V0B/ATP6V1H	7
MF	GO:0044325	ion channel binding	21/1468	128/18337	0.00123983	0.0283784	0.0255507	YWHAH/CALM1/HSP90AB1/KCNB1/NPTN/FKBP1A/SNTA1/SLC5A3/FYN/YWHAE/CALM3/LYN/STX1A/FKBP1B/CALM2/FLNA/FHL1/ANK3/FXYD1/HOMER1/ID2	21
MF	GO:0043024	ribosomal small subunit binding	6/1468	17/18337	0.00149041	0.0333723	0.030047	EIF1/LARP1/MTIF3/EIF1B/NPM1/PIM1	6
MF	GO:0008179	adenylate cyclase binding	5/1468	12/18337	0.00160361	0.0351429	0.0316412	CALM1/CAP2/CALM3/CALM2/CAP1	5
MF	GO:0016829	lyase activity	28/1468	194/18337	0.00167843	0.0351764	0.0316713	ALDOC/ENO2/ETNPPL/CSAD/CA11/CYP1B1/RPS3/XRCC5/FASN/FAHD2A/PAM/RNASET2/GAD2/ENO1/ACO1/MGST3/CA10/GLO1/TPI1/ECHS1/UROD/HOGA1/CA2/ADCY3/PCBD1/CA8/GAD1/TYW1	28
MF	GO:0016620	oxidoreductase activity, acting on the aldehyde or oxo group of donors, NAD or NADP as acceptor	9/1468	36/18337	0.00170759	0.0351764	0.0316713	HSD17B12/PDHB/GAPDH/ALDH2/ALDH4A1/ALDH5A1/DLD/ALDH1A3/AKR1B1	9
MF	GO:0044183	protein folding chaperone	9/1468	36/18337	0.00170759	0.0351764	0.0316713	HSPA1B/HSP90AB1/HSPA6/HSPA9/CCT7/PFDN2/HSPB1/CD74/DNAJB1	9
MF	GO:0047485	protein N-terminus binding	18/1468	106/18337	0.00180559	0.0364657	0.0328322	HSPA1B/VWF/PDLIM5/CALM1/RBPJ/RPS21/FEZ1/ERCC5/DCN/MORF4L1/CALM3/STX1A/PPP1CC/CALM2/SMARCA4/PEX14/MAP2K1/GAD1	18
MF	GO:0072542	protein phosphatase activator activity	5/1468	13/18337	0.00243508	0.0482333	0.0434272	CALM1/PPP2R5B/CALM3/CALM2/PPP2R5E	5
MF	GO:0048306	calcium-dependent protein binding	15/1468	84/18337	0.00254297	0.0492894	0.0443781	CALM1/S100A6/SNAP25/S100A13/CABP1/S100A1/SEC31A/CALM3/VAMP2/STX1A/SYT1/S100A8/SLC9A1/PEF1/ANXA1	15
MF	GO:0005518	collagen binding	13/1468	68/18337	0.0025841	0.0492894	0.0443781	SPARC/VWF/SPARCL1/HSD17B12/ADGRG1/CTSB/DCN/SMAD3/COL6A2/TGFBI/PDGFA/CTSL/AEBP1	13

## Sheet: KEGG analysis
ID	Description	GeneRatio	BgRatio	pvalue	p.adjust	qvalue	geneID	Count
hsa03010	Ribosome	55/744	158/8163	1.68575e-19	5.52927e-17	4.241e-17	6160/6169/6143/6124/6152/6135/6208/6231/6125/11224/6171/6229/6230/6142/6192/6168/6141/6191/7311/6232/3921/6147/6194/6176/6204/6188/6228/6227/6189/51065/79590/6224/2197/6181/6155/6202/6154/6201/6122/6144/25873/4736/54948/23521/6133/6156/63875/6234/6157/64968/6222/6203/6139/6223/9349	55
hsa05171	Coronavirus disease - COVID-19	66/744	232/8163	6.84159e-18	1.12202e-15	8.60601e-16	6160/6169/6143/6124/7450/6152/6135/6208/6231/6125/5595/11224/6171/6229/6230/6142/6192/5579/9636/6168/6141/6191/7311/6232/3921/6147/6194/6176/6204/6188/6228/6227/6773/6189/51065/6224/2197/6181/6155/6202/6154/6201/6122/6144/25873/4792/4736/712/23521/6133/3553/5582/6156/6234/103/714/6157/1440/6222/10379/6203/6139/6223/9349/7097/718	66
hsa05012	Parkinson disease	61/744	266/8163	5.31867e-12	5.81508e-10	4.46022e-10	815/347733/4697/7846/5688/5705/801/29796/7280/84790/7316/4718/7311/2861/2771/6647/4698/4710/4723/9377/1327/1350/10383/7314/4705/4711/1351/4128/4728/7345/5717/10376/5691/374291/2778/5702/4714/808/9627/6392/6391/9927/6389/805/5682/4217/7317/5687/7417/1649/1843/4716/293/4725/51465/5710/5704/64837/5693/11047/4713	61
hsa05022	Pathways of neurodegeneration - multiple diseases	87/744	476/8163	8.51606e-11	6.98317e-09	5.35615e-09	815/347733/4697/4744/7846/5595/5688/5705/801/29796/5621/7280/5579/84790/7316/4718/7311/2861/6647/4698/5534/4710/4723/9377/2891/1327/1350/10383/10133/7314/4705/4711/57679/823/1351/4728/7345/5717/10376/5691/2902/374291/10297/6311/84134/3553/5582/5702/4714/808/10126/6804/5879/9627/6392/9706/6391/9927/7976/6389/805/5682/8878/2878/4217/7317/5687/775/60673/7417/1649/4716/4747/293/4725/51465/5710/3265/2…	87
hsa05016	Huntington disease	64/744	306/8163	1.09972e-10	7.21416e-09	5.53332e-09	6507/347733/4697/7846/5688/5705/29796/7280/84790/4718/6647/4698/3766/4710/4723/9377/2891/1327/1350/10383/5438/5435/4705/4711/1351/163/6506/4728/5717/10376/1175/5691/2902/374291/5702/4714/10126/6804/6392/9706/6391/6389/5682/2878/4217/5687/60673/5441/7417/10891/4716/5439/1213/9586/293/4725/5430/5710/23236/5704/64837/5693/11047/4713	64
hsa05020	Prion disease	56/744	273/8163	3.62548e-09	1.98193e-07	1.52016e-07	347733/3304/4697/7846/5595/5688/5705/29796/5621/7280/84790/4718/6647/4698/5534/4710/4723/9377/1327/1350/10383/3310/4705/4711/1351/4728/2534/5717/10376/5691/2902/374291/712/3553/5702/4714/5879/6392/6391/6389/714/5682/5687/775/7417/1649/4716/9586/293/4725/5710/5704/64837/5693/11047/4713	56
hsa05010	Alzheimer disease	66/744	384/8163	2.20841e-07	1.0348e-05	7.937e-06	347733/348/4697/7846/5595/5688/5705/801/29796/7280/84790/4718/4698/5534/4710/4723/9377/1327/1350/10313/10383/4705/2597/4711/57142/823/1351/4728/5717/10376/5691/2902/374291/10297/3553/23621/5702/4714/808/6392/9706/6391/7976/6389/805/5682/4217/5687/775/60673/7417/1649/4716/293/4725/5710/3265/8883/23236/5704/64837/3028/5693/5604/11047/4713	66
hsa01200	Carbon metabolism	29/744	115/8163	2.71032e-07	1.11123e-05	8.52325e-06	230/2746/5214/2026/5211/26227/29968/84706/2653/84532/5162/7086/2597/2023/48/7167/1892/6392/6391/4190/6389/2747/4191/55753/1738/4967/1431/6888/39	29
hsa04971	Gastric acid secretion	22/744	76/8163	5.98897e-07	2.18265e-05	1.67411e-05	815/60/478/801/5579/2771/3766/477/481/476/483/482/887/2778/5582/808/805/6548/760/109/23236/6752	22
hsa05014	Amyotrophic lateral sclerosis	62/744	364/8163	7.24647e-07	2.37684e-05	1.82306e-05	60/347733/4697/4744/7846/5688/5705/29796/7280/84790/4718/6647/4698/5534/4710/4723/9377/2891/1327/1350/10383/10133/4705/4711/57679/1351/6506/4728/5717/10376/5691/2902/374291/6311/84134/5702/4714/29978/10126/5879/6392/9706/6391/6389/5682/8878/2878/4217/5687/60673/1649/4716/4747/4725/5710/5704/64837/5217/5693/11047/2521/4713	62
hsa04721	Synaptic vesicle cycle	22/744	78/8163	9.79118e-07	2.91955e-05	2.23932e-05	6507/5864/527/526/529/535/51382/6616/533/163/6506/1175/10815/4905/6844/6804/6857/51606/6539/1213/6809/140679	22
hsa04964	Proximal tubule bicarbonate reclamation	11/744	23/8163	1.62828e-06	4.45064e-05	3.41368e-05	478/2746/358/477/481/476/483/482/4190/2747/760	11
hsa00190	Oxidative phosphorylation	29/744	134/8163	7.68624e-06	0.00019393	0.000148746	527/4697/526/29796/529/535/4718/51382/4698/4710/4723/9377/1327/1350/533/4705/4711/1351/4728/374291/4714/6392/6391/6389/5464/51606/4716/4725/4713	29
hsa04911	Insulin secretion	21/744	86/8163	2.04355e-05	0.000478774	0.000367224	815/5864/2767/478/5579/885/6616/11069/477/481/476/483/482/2778/5582/6844/6804/775/9586/109/23236	21
hsa04261	Adrenergic signaling in cardiomyocytes	30/744	150/8163	2.75655e-05	0.000602766	0.000462327	815/478/5595/801/5518/2771/11069/477/481/476/10368/483/482/5522/5515/2778/5526/808/5501/4625/805/785/775/28227/6548/5521/5529/9586/109/23236	30
hsa00020	Citrate cycle (TCA cycle)	11/744	30/8163	3.6223e-05	0.00069889	0.000536055	5162/48/6392/6391/4190/6389/4191/55753/1738/4967/1431	11
hsa00630	Glyoxylate and dicarboxylate metabolism	11/744	30/8163	3.6223e-05	0.00069889	0.000536055	2653/84532/48/4190/4191/81888/112817/1738/2752/1431/39	11
hsa04961	Endocrine and other factor-regulated calcium reabsorption	15/744	53/8163	4.9895e-05	0.000909197	0.000697363	478/5579/477/481/476/483/482/163/1175/2778/5582/793/1213/8766/23236	15
hsa04145	Phagosome	29/744	152/8163	9.16646e-05	0.00156697	0.00120188	60/347733/527/526/7846/529/535/1778/7280/84790/51382/3115/10383/1783/533/10376/821/5869/6890/7060/1780/5879/7037/2214/51606/3693/1514/7097/718	29
hsa04540	Gap junction	20/744	88/8163	9.55472e-05	0.00156697	0.00120188	2767/347733/7846/5595/7280/2697/5579/84790/2771/10383/10376/2778/5582/3356/5154/3265/109/5159/23236/5604	20
hsa04727	GABAergic synapse	20/744	89/8163	0.000112926	0.00172896	0.00132613	5579/2771/54407/2554/81539/2572/2775/23710/5582/4905/2550/775/6539/2752/10243/109/2788/2791/140679/2571	20
hsa04714	Thermogenesis	39/744	232/8163	0.000115967	0.00172896	0.00132613	60/4697/29796/11343/4718/6194/4698/4710/4723/9377/1327/1350/4705/4711/1351/4728/374291/2778/4714/6392/6391/6389/6196/4217/6597/123096/10891/51703/4716/9586/8110/4725/51412/3265/109/55818/84987/126129/4713	39
hsa04728	Dopaminergic synapse	26/744	132/8163	0.000121516	0.00173292	0.00132917	815/801/5518/50632/5579/2771/2891/5522/4128/5515/6323/2775/2778/5582/5526/808/5501/805/775/28227/5521/5529/9586/2788/2791/23236	26
hsa04723	Retrograde endocannabinoid signaling	28/744	148/8163	0.000140244	0.00191666	0.0014701	4697/5595/11343/5579/4718/2771/4698/4710/4723/2891/2554/4705/4711/4728/374291/2775/5582/4714/57406/775/4716/4725/109/2788/2791/23236/140679/4713	28
hsa05017	Spinocerebellar ataxia	27/744	143/8163	0.000189963	0.00249232	0.00191163	5688/5705/5649/5579/3516/2891/9698/5717/5691/2902/6311/5582/5702/9706/5682/4217/5687/60673/7417/4976/23152/293/5710/23236/5704/5693/11047	27
hsa04720	Long-term potentiation	16/744	67/8163	0.000256823	0.00313461	0.00240428	815/5595/801/5579/5534/2891/2902/5582/808/5501/805/6196/775/3265/23236/5604	16
hsa05132	Salmonella infection	40/744	249/8163	0.000258032	0.00313461	0.00240428	60/347733/6932/7846/5595/10094/3326/1778/7280/84790/8655/6188/6500/10383/9267/1783/3606/2597/10376/4792/81873/5869/3553/83658/1780/5879/9475/27072/2316/391/79443/9842/23643/10095/3265/5898/64837/7097/5217/5604	40
hsa04921	Oxytocin signaling pathway	28/744	154/8163	0.000281614	0.00329891	0.00253029	815/60/5595/801/5579/2002/2771/57118/5534/10368/1938/2775/4208/2778/5582/808/5501/10645/9475/805/785/775/1827/3265/109/23236/4637/5604	28
hsa04918	Thyroid hormone synthesis	17/744	75/8163	0.000325069	0.00367363	0.0028177	478/5579/477/481/476/7276/483/482/821/2778/5582/8458/2878/5172/9586/109/23236	17
hsa05415	Diabetic cardiomyopathy	34/744	203/8163	0.000336002	0.00367363	0.0028177	815/4697/29796/5579/4718/4698/4710/4723/9377/1327/1350/5166/5162/4705/2597/4711/1351/4728/374291/4088/5582/4714/5879/6392/5501/6391/6389/51660/7417/4716/293/4725/23236/4713	34
hsa05031	Amphetamine addiction	16/744	69/8163	0.000367822	0.00389179	0.00298504	815/801/5579/2354/5534/2891/4128/2902/2778/5582/808/6804/5501/805/775/9586	16
hsa04071	Sphingolipid signaling pathway	23/744	119/8163	0.000392476	0.00402287	0.00308558	5595/5518/5579/2771/253782/5522/2534/5515/1901/5582/5526/5879/9475/56848/4217/28227/5521/5529/134/91012/3265/23236/5604	23
hsa04925	Aldosterone synthesis and secretion	20/744	98/8163	0.000444193	0.00441501	0.00338635	815/2767/478/801/5579/57118/477/481/476/483/482/2778/5582/808/805/775/9586/109/3949/23236	20
hsa04724	Glutamatergic synapse	22/744	114/8163	0.000532825	0.00514019	0.00394258	6507/5595/5579/2771/5534/54407/2891/81539/6506/2902/2775/2778/5582/2914/775/2752/109/2788/2791/9456/23236/2918	22
hsa04730	Long-term depression	14/744	60/8163	0.000789632	0.00739998	0.00567585	2767/5595/5518/5579/2771/2891/5515/2775/2778/5582/4067/3265/23236/5604	14
hsa05208	Chemical carcinogenesis - reactive oxygen species	35/744	223/8163	0.000947973	0.00863709	0.00662473	4697/5595/29796/4718/1545/6647/4698/4710/4723/9377/1327/1350/4705/4711/1351/4728/4259/374291/4792/5781/4714/5879/6392/4257/6391/6389/4217/7417/4716/293/4725/3265/1728/5604/4713	35
hsa01230	Biosynthesis of amino acids	16/744	75/8163	0.000979561	0.00868367	0.00666046	230/5214/2026/5211/26227/29968/84706/7086/2597/2023/48/7167/4144/2752/1431/6888	16
hsa04960	Aldosterone-regulated sodium reabsorption	10/744	37/8163	0.00132966	0.0114771	0.008803	478/5595/5579/477/481/476/483/482/5582/6446	10
hsa04962	Vasopressin-regulated water reabsorption	11/744	44/8163	0.00155602	0.0130253	0.00999053	1778/8655/1783/5869/2778/4905/1780/6844/9586/8766/109	11
hsa04932	Non-alcoholic fatty liver disease	26/744	155/8163	0.00158845	0.0130253	0.00999053	4697/29796/4718/4698/4710/4723/9377/1327/1350/4705/4711/1351/4728/374291/3553/4714/5879/6392/6391/79602/6389/4217/1649/4716/4725/4713	26
hsa04260	Cardiac muscle contraction	17/744	87/8163	0.00192078	0.0153663	0.0117861	478/29796/477/481/9377/1327/1350/476/10368/483/482/1351/4625/785/775/6548/10479	17
hsa03050	Proteasome	11/744	46/8163	0.00228797	0.017868	0.0137049	5688/5705/5717/5691/5702/5682/5687/5710/5704/5693/11047	11
hsa04978	Mineral absorption	13/744	60/8163	0.00246503	0.0186828	0.0143299	4494/478/2495/4495/4502/4496/477/481/4501/476/483/482/79901	13
hsa04015	Rap1 signaling pathway	32/744	210/8163	0.00250623	0.0186828	0.0143299	60/5595/801/22808/5579/2771/11069/2261/5909/26037/7408/51466/2902/2775/2778/50855/5582/808/5879/3815/805/51196/3674/5154/3265/109/5159/23236/5898/5217/5604/83660	32
hsa04713	Circadian entrainment	18/744	97/8163	0.00261726	0.0190769	0.0146322	815/5595/801/5579/2771/2891/2902/2775/2778/5582/808/805/775/9722/109/2788/2791/23236	18
hsa04919	Thyroid hormone signaling pathway	21/744	121/8163	0.00283664	0.0202265	0.0155139	60/478/5214/5595/5211/5579/477/481/476/10231/483/482/5582/2308/4625/51196/6548/1827/3265/23236/5604	21
hsa04970	Salivary secretion	17/744	92/8163	0.00355846	0.0248335	0.0190475	478/801/1471/5579/477/481/476/483/482/2778/5582/808/6844/805/6548/109/23236	17
hsa04022	cGMP-PKG signaling pathway	26/744	167/8163	0.0045714	0.0294665	0.0226011	2767/478/5595/801/2771/5534/477/481/476/483/482/7408/4208/808/5501/9475/4625/805/775/7417/134/9586/293/109/23236/5604	26
hsa01212	Fatty acid metabolism	12/744	57/8163	0.00457533	0.0294665	0.0226011	37/6319/51144/2194/9415/3992/1892/6785/51703/126129/84869/39	12
hsa05134	Legionellosis	12/744	57/8163	0.00457533	0.0294665	0.0226011	3304/1915/1937/1917/664/3310/3606/4792/3553/56681/7097/718	12
hsa05110	Vibrio cholerae infection	11/744	50/8163	0.00458169	0.0294665	0.0226011	60/527/526/529/535/51382/533/2778/51606/30001/109	11
hsa05143	African trypanosomiasis	9/744	37/8163	0.00498101	0.0314187	0.0240984	3043/5579/3039/3040/169355/3606/3553/5582/23236	9
hsa00010	Glycolysis / Gluconeogenesis	13/744	67/8163	0.00669311	0.0414215	0.0317707	230/5214/2026/5211/3945/84532/5162/2597/2023/7167/217/1738/3939	13
hsa05214	Glioma	14/744	75/8163	0.00710961	0.042662	0.0327222	815/5595/801/5579/57118/10912/5582/808/805/51426/5154/3265/5159/5604	14
hsa04371	Apelin signaling pathway	22/744	139/8163	0.00715369	0.042662	0.0327222	6696/5595/801/22808/9759/2771/6194/187/4208/4088/808/56848/805/6548/10365/10891/3265/109/2788/2791/23236/5604	22
hsa04510	Focal adhesion	29/744	201/8163	0.00846561	0.0495281	0.0379885	60/7450/6696/5595/5649/5579/2002/3611/2534/7408/331/5582/7060/5879/5501/1292/9475/2316/56924/3674/3693/1287/5154/3265/23396/5159/894/5604/83660	29
hsa00620	Pyruvate metabolism	10/744	47/8163	0.00860702	0.0495281	0.0379885	3945/84532/5162/2739/217/4190/4191/1738/3939/39	10
hsa04966	Collecting duct acid secretion	7/744	27/8163	0.00890604	0.0503652	0.0386306	527/526/529/535/51382/10723/760	7
hsa04066	HIF-1 signaling pathway	18/744	109/8163	0.00925292	0.0509905	0.0391102	815/230/5214/2026/5595/5211/5579/3945/6194/5162/2597/2023/7076/7428/5582/7037/3939/5604	18
hsa04916	Melanogenesis	17/744	101/8163	0.00932753	0.0509905	0.0391102	815/6932/5595/801/5579/2771/2775/2778/5582/808/3815/7976/805/3265/109/23236/5604	17
hsa04024	cAMP signaling pathway	31/744	221/8163	0.00989812	0.0532227	0.0408223	815/478/5595/801/2771/11069/477/481/2891/476/483/4852/482/2902/4792/2778/808/5879/5501/9475/805/2550/51196/775/6548/134/9586/109/5348/5604/6752	31
hsa04216	Ferroptosis	9/744	41/8163	0.0101025	0.0534457	0.0409933	2495/5621/6303/23657/5093/2879/7037/7417/51703	9
hsa05165	Human papillomavirus infection	43/744	331/8163	0.0105468	0.0549106	0.0421169	527/7450/6932/6696/526/5595/5518/23462/529/535/5649/3516/9636/51382/6773/57801/533/5522/5515/2778/50855/10297/10474/5526/7060/2308/1292/7976/28227/51606/26508/3674/5521/3693/5529/10379/1287/9586/3265/5159/894/5604/55502	43
hsa04152	AMPK signaling pathway	19/744	121/8163	0.0129212	0.0662211	0.0507922	5214/5518/5211/6319/10890/2194/5522/1938/5515/5526/2308/10645/79602/28227/5521/5529/10891/9586/126129	19
hsa03015	mRNA surveillance pathway	16/744	97/8163	0.0138096	0.0696853	0.0534492	5518/10250/23049/80335/5522/4440/5515/5526/5501/55339/28227/81608/5521/5529/29101/2521	16
hsa00910	Nitrogen metabolism	5/744	17/8163	0.0151817	0.0754486	0.0578698	2746/2747/760/2752/767	5
hsa00250	Alanine, aspartate and glutamate metabolism	8/744	37/8163	0.0163605	0.0800933	0.0614323	2746/84706/2572/8659/7915/2747/2752/2571	8
hsa04144	Endocytosis	33/744	251/8163	0.0197685	0.0953537	0.0731372	3304/10094/2261/10890/6456/9372/128866/3310/9267/163/9135/51510/1175/84440/84249/9559/81873/55737/5869/50855/4088/7037/51324/1213/10095/8766/3265/3949/23396/147179/56904/29924/23362	33
hsa04912	GnRH signaling pathway	15/744	93/8163	0.0203283	0.0953644	0.0731453	815/2767/5595/801/5579/2002/2778/808/805/775/3265/109/23236/2185/5604	15
hsa05130	Pathogenic Escherichia coli infection	27/744	197/8163	0.0203521	0.0953644	0.0731453	60/347733/7846/5595/10094/7009/7280/84790/6188/10383/4628/9267/3606/2597/2534/10376/4792/81873/5781/3553/23365/5879/9475/24146/10095/147179/79784	27
hsa04972	Pancreatic secretion	16/744	102/8163	0.021601	0.0984047	0.0754773	478/5579/885/477/481/476/483/482/2778/5582/5879/6548/760/8766/109/23236	16
hsa05142	Chagas disease	16/744	102/8163	0.021601	0.0984047	0.0754773	2767/5595/5518/2771/5522/5515/2775/4792/2778/712/3553/714/5521/23236/7097/718	16
hsa05120	Epithelial cell signaling in Helicobacter pylori infection	12/744	70/8163	0.0231951	0.104219	0.0799371	527/526/529/535/51382/5803/533/4792/5781/4067/5879/51606	12
hsa00790	Folate biosynthesis	6/744	26/8163	0.0265469	0.116134	0.0890754	250/5860/249/10243/5092/231	6
hsa05418	Fluid shear stress and atherosclerosis	20/744	139/8163	0.0265549	0.116134	0.0890754	60/801/3326/51588/4259/4208/3553/808/5879/4257/805/8878/4217/10365/3674/1843/6612/5154/1514/1728	20
hsa04137	Mitophagy - animal	12/744	72/8163	0.0283697	0.122411	0.0938907	22808/7316/7311/664/10133/7314/89941/23710/51024/9927/8878/3265	12
hsa04666	Fc gamma R-mediated phagocytosis	15/744	97/8163	0.0287368	0.122411	0.0938907	85477/5595/10094/5579/7408/81873/5582/4067/5879/56848/2214/65108/10095/23396/5604	15
hsa01040	Biosynthesis of unsaturated fatty acids	6/744	27/8163	0.0315872	0.132828	0.10188	6319/51144/9415/3992/10965/6785	6
hsa04922	Glucagon signaling pathway	16/744	107/8163	0.032345	0.133272	0.102221	815/5214/801/5211/3945/5534/5162/2778/808/2308/805/10891/3939/9586/23236/126129	16
hsa04936	Alcoholic liver disease	20/744	142/8163	0.0325053	0.133272	0.102221	6932/37/6319/23175/2194/29896/4792/712/3553/217/2308/10645/79602/714/4217/10891/23643/6434/126129/718	20
hsa04270	Vascular smooth muscle contraction	19/744	134/8163	0.0343821	0.139226	0.106788	2767/5595/801/10267/5579/4628/2778/5582/808/23365/5501/9475/805/775/109/23236/4637/5604/79784	19
hsa04141	Protein processing in endoplasmic reticulum	23/744	171/8163	0.0369667	0.147867	0.113415	3304/3326/26232/6500/10294/3310/823/6185/3301/821/22872/23193/29978/7466/4217/1649/1650/30001/6184/51465/3337/56681/27248	23
hsa00270	Cysteine and methionine metabolism	9/744	51/8163	0.0389245	0.153822	0.117983	10768/26227/3945/29968/4144/4190/4191/3939/4357	9
hsa04010	MAPK signaling pathway	36/744	294/8163	0.040335	0.157499	0.120803	3304/5595/22808/3727/5579/1845/2002/5534/2261/1850/10368/3310/23162/9479/3315/4208/3553/10912/5582/5879/3815/2316/5871/785/6196/4217/7786/775/1649/1848/1843/5154/3265/5495/5159/5604	36
hsa05131	Shigellosis	31/744	247/8163	0.0409601	0.158058	0.121232	60/5595/10094/7316/7311/6500/64121/664/7307/9267/7314/3611/3606/823/58528/4792/7335/81873/831/3553/2308/5879/9475/51196/8878/25851/10095/23236/5217/718/83660	31
hsa05140	Leishmaniasis	12/744	77/8163	0.0448723	0.171141	0.131267	1915/5595/5579/2002/1917/3115/4792/3553/2214/65108/7097/718	12
hsa04924	Renin secretion	11/744	69/8163	0.0463874	0.174886	0.134139	801/2771/358/5534/1508/2778/808/805/775/134/23236	11
hsa04072	Phospholipase D signaling pathway	20/744	148/8163	0.0473066	0.176324	0.135242	5595/22808/11069/9267/2534/2778/5781/2914/3815/56848/5154/3265/109/23396/5159/23236/5898/2185/5604/2918	20
hsa04725	Cholinergic synapse	16/744	113/8163	0.0498827	0.182784	0.140197	815/2767/5595/5579/2771/2534/2775/5582/775/9586/3265/109/2788/2791/23236/5604	16
