# Supplementary material for: Sensitivity of substrate translocation in chaperone-mediated autophagy to Alzheimer’s disease progression
Source: Aging (Albany NY). 2024 May 23;16(10):9072–105. doi: 10.18632/aging.205856 (PMC11164475; doi:10.18632/aging.205856)
Supplement: Supplementary File 4 [file aging-16-205856-s006.xlsx]

## Sheet: Sheet1
Supplementary File 4. Result set S_6.
Gene name
GFAP		All genes in set S6
CLU
APOE
HSPA1B
EEF1A1
RPL11
RPL5
HSP90AB1
GJA1
CST3
TMEM9
CDK5RAP3
EEF1A2
VGLL4
RACK1
PTTG1IP
ZYG11B
RYBP
UBB
SNRNP70
FYN
RPS7
TIMP1
BAG6
VPS35
CTSA
APC2
SMAD3
N4BP1
PITHD1
IL1B
PRKCG
NSF
PSMC3
UBQLN2
FOXO1
NELL1
FLNA
TIMP2
F8A1
RNF40
NUB1
RAB26
RPL23
LDLR
FURIN
PSMC4
PTK2B
ABCA2
SORL1
OAZ1
