# Supplementary material for: Sensitivity of substrate translocation in chaperone-mediated autophagy to Alzheimer’s disease progression
Source: Aging (Albany NY). 2024 May 23;16(10):9072–105. doi: 10.18632/aging.205856 (PMC11164475; doi:10.18632/aging.205856)
Supplement: Supplementary File 5 [file aging-16-205856-s007.xlsx]

## Sheet: betweenness
Supplementary File 5. Result set S_6 score table.
rank	Betweenness	name
1	172.767	GFAP
2	143.745	HSP90AB1
3	129.798	SMAD3
4	121.337	UBB
5	83.3119	IL1B
6	55.1976	GNB2L1
7	52.9643	FYN
8	50.6071	APOE
9	46.8341	PSMC3
10	46.8341	PSMC4
11	45.5881	EEF1A1
12	40.1651	FLNA
13	39.9405	CLU
14	29.9889	TIMP1
15	28.8333	OAZ1
16	25.0857	PTK2B
17	24.3405	LDLR
18	17.4714	FURIN
19	17.3937	TIMP2
20	10.5238	UBQLN2
21	8.60952	SORL1
22	6.69683	HSPA1B
23	4.3	CST3
24	4.2	PRKCG
25	4.16667	GJA1
26	3.39365	RPL5
27	3.39365	RPL11
28	2.00635	RPL23
29	2.00635	RPS7
30	0.5	EEF1A2
31	0	NUB1
32	0	FOXO1
