# Supplementary material for: Sensitivity of substrate translocation in chaperone-mediated autophagy to Alzheimer’s disease progression
Source: Aging (Albany NY). 2024 May 23;16(10):9072–105. doi: 10.18632/aging.205856 (PMC11164475; doi:10.18632/aging.205856)
Supplement: Supplementary File 6 [file aging-16-205856-s008.xlsx]

## Sheet: T-test result
Supplementary File 6. Differential analysis results.
T-test results of genes related to the CMA substrate entry into lysosomes under different datasets (T-test between control and AD groups)
gene name	GSE15222	GSE5281	GSE1297
GFAP	0.0003	0.0018	0.0011
LAMP2	0.0201	0.0099	0.0812
HSP90AB1	0.0059	0.0027	0.0048
EEF1A1	0.2972	0.1141	0.0334
The normality of genes related to the CMA substrate entry into lysosomes across different datasets (√: indicates an approximation to normal distribution)
	GSE15222	GSE5281	GSE1297
GFAP（Controll group）	√	√	√
GFAP（AD group）	√	√	√
LAMP2（Controll group）		√	√
LAMP2（AD group）			√
HSP90AB1（Controll group）	√	√	√
HSP90AB1（AD group）		√	√
EEF1A1（Controll group）	√
EEF1A1（AD group）	√		√
