# Supplementary material for: Sensitivity of substrate translocation in chaperone-mediated autophagy to Alzheimer’s disease progression
Source: publisher site journal article supplement (doi:10.18632/aging.205856), 2024-05-23
Supplement: Supplementary file [file aging-v16i10-205856-supplementary-material-SD2.pdf]

**SUPPLEMENTARY FIGURES**

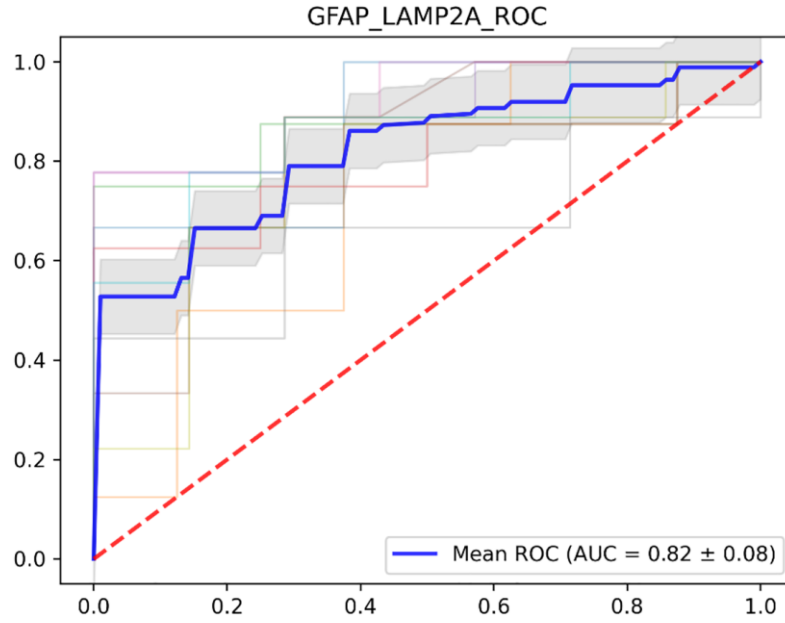

**Supplementary Figure 1. Results of ten-fold cross validation of support vector machine model in GFAP and LAMP2A combination.**

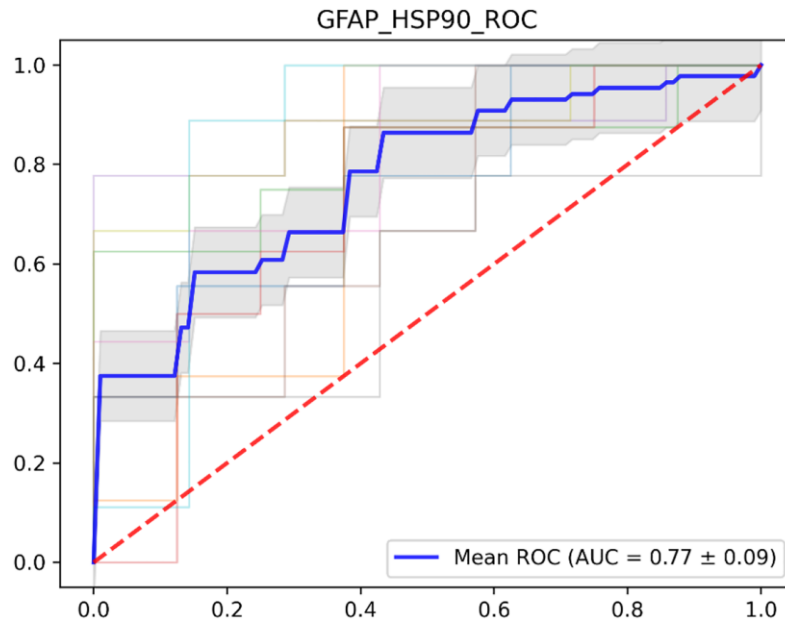

**Supplementary Figure 2. Results of ten-fold cross validation of support vector machine model in GFAP and HSP90AB1 combination.**

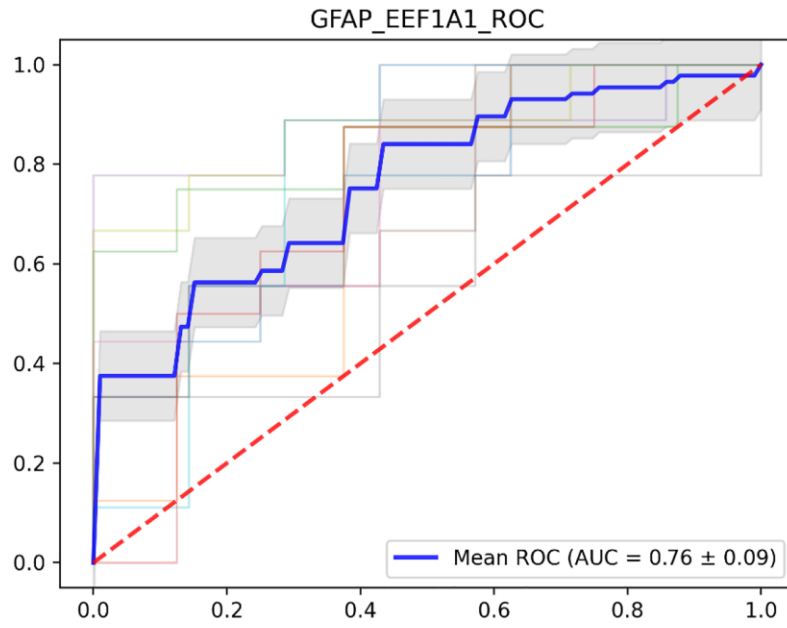

**Supplementary Figure 3. Results of ten-fold cross validation of support vector machine model in GFAP and EEF1A1 combination.**
